# Supplementary material for: BF3·OEt2-mediated nucleophilic fluorocyclization of sulfonyl 3-methylene-oxabenzocyclooctan-6-ones. Diastereocontrolled synthesis of benzofused fluorooxabicyclo[4.2.1]nonanes
Source: Royal Society of Chemistry journal article supplement (doi:10.1039/d2ob01459a), 2022-01-01
Supplement: d2ob01459a1.pdf [file d2ob01459a1.pdf]

# Supporting Information

## **BF<sub>3</sub>·OEt<sub>2</sub>-Mediated Nucleophilic Fluorocyclization of Sulfonyl 3-Methylene-oxabenzocyclooctan-6-ones. Diastereocontrolled Synthesis of Benzofused Fluorooxabicyclo[4.2.1]nonanes**

Nai-Chen Hsueh<sup>a</sup> and Meng-Yang Chang<sup>\*a,b</sup>

<sup>a</sup>Department of Medicinal and Applied Chemistry, Kaohsiung Medical University, Kaohsiung 807, Taiwan. <sup>b</sup>Department of Medical Research, Kaohsiung Medical University Hospital, Kaohsiung 807, Taiwan. <sup>c</sup>NPUST College of Professional Studies, National Pingtung University of Science and Technology, Pingtung 912, Taiwan.

\*Corresponding author, email: [mychang@kmu.edu.tw](mailto:mychang@kmu.edu.tw)

### Table of Contents

|                                                                                                       |             |
|-------------------------------------------------------------------------------------------------------|-------------|
| 1. <sup>1</sup> H NMR and <sup>13</sup> C NMR spectra copies of <b>4a-4aa</b>                         | S-2~S-55    |
| 2. <sup>1</sup> H NMR and <sup>13</sup> C NMR spectra copies of <b>6a, 5a-5s, 5r-1, 6t, 5u-5v, 5y</b> | S-56~S-111  |
| 3. <sup>1</sup> H NMR and <sup>13</sup> C NMR spectra copies of <b>7a-7b, 9</b>                       | S-112~S-117 |
| 4. X-ray crystal data of <b>4l, 5d, 5j, 5l, 5m, 6a, 7a, 7b</b> and <b>9</b>                           | S-118~S-135 |

# Compound 4a (<sup>1</sup>H-NMR spectral data)

NC1081129

Pulse Sequence: s2pu1  
 UNITYplus-400 "unity400"  
 Date: Nov 29 2019  
 Solvent: CDC13  
 Ambient temperature  
 Total 32 repetitions

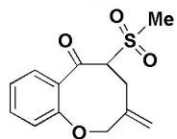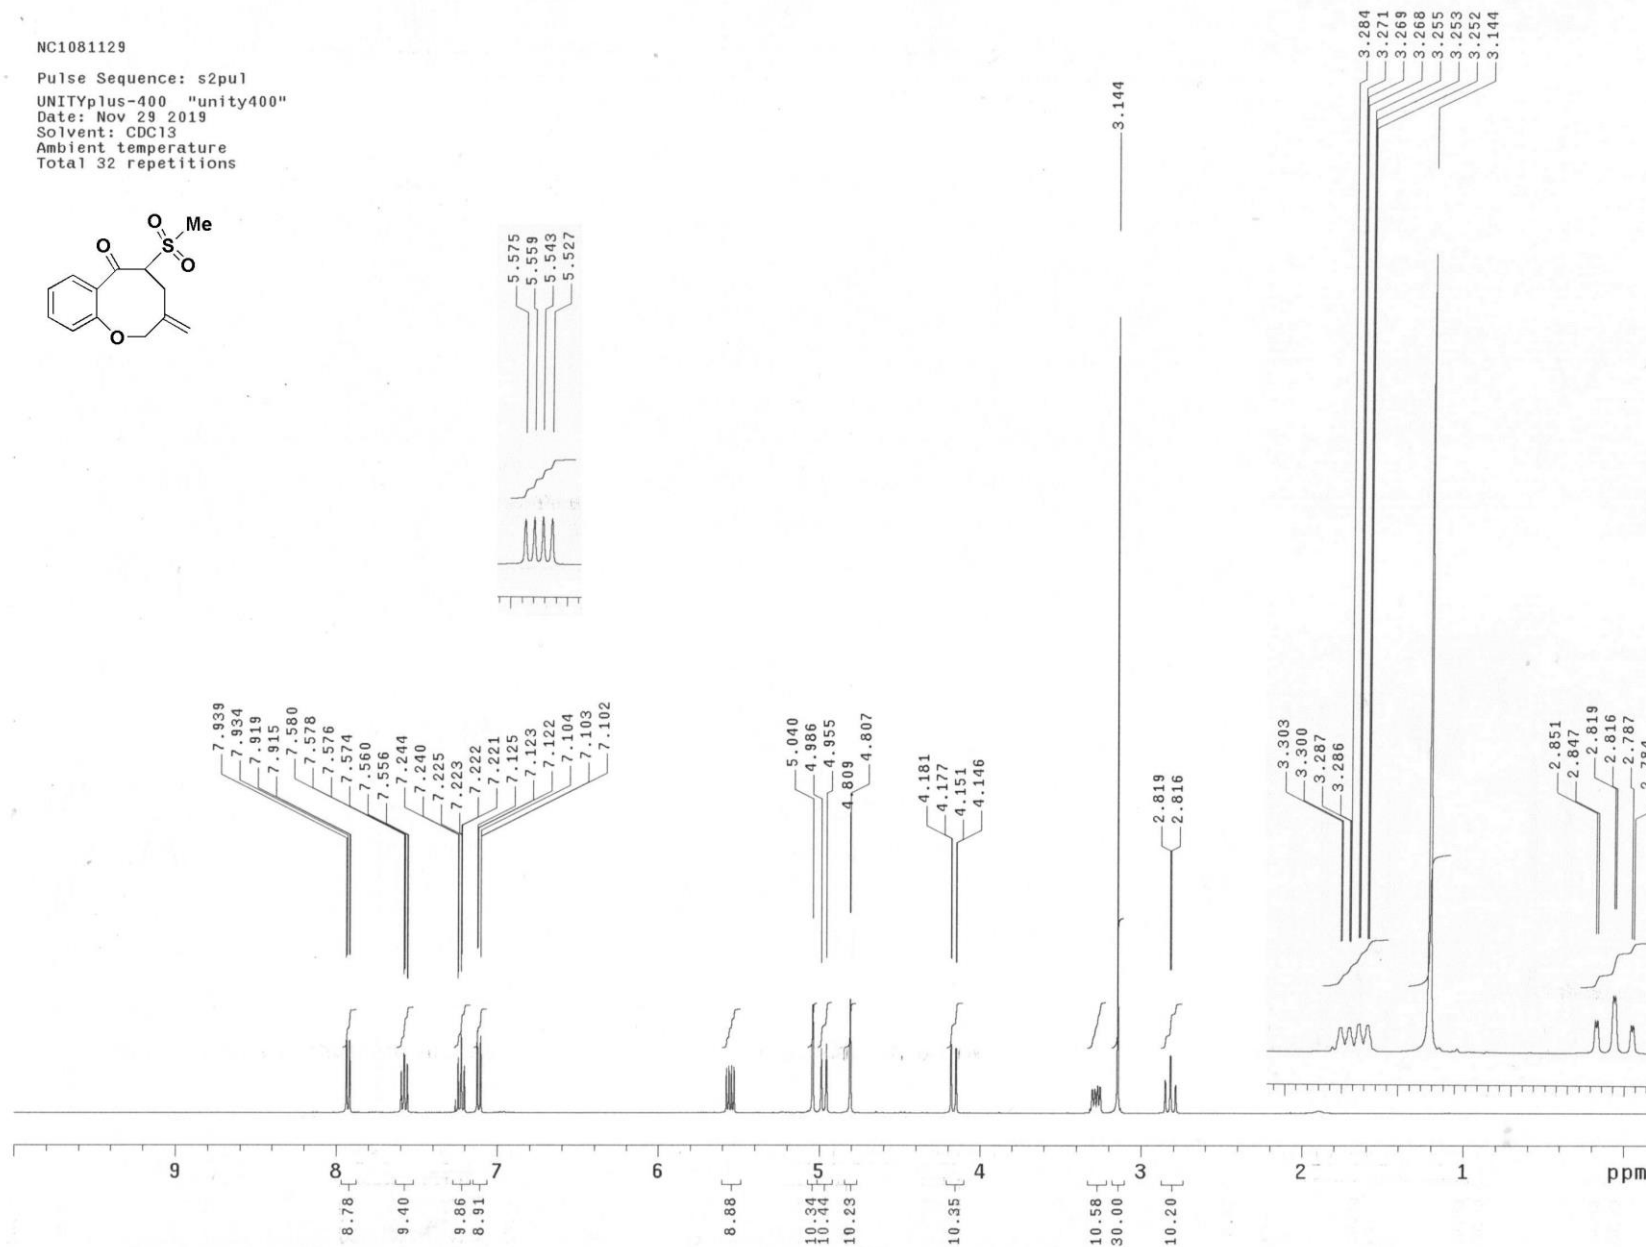

# Compound 4a (<sup>13</sup>C-NMR spectral data)

NC1081129

Pulse Sequence: s2pu1

UNITYplus-400 "unity400"

Date: Nov 29 2019

Solvent: CDCl<sub>3</sub>

Ambient temperature

Total 256 repetitions

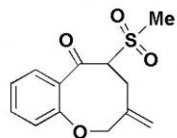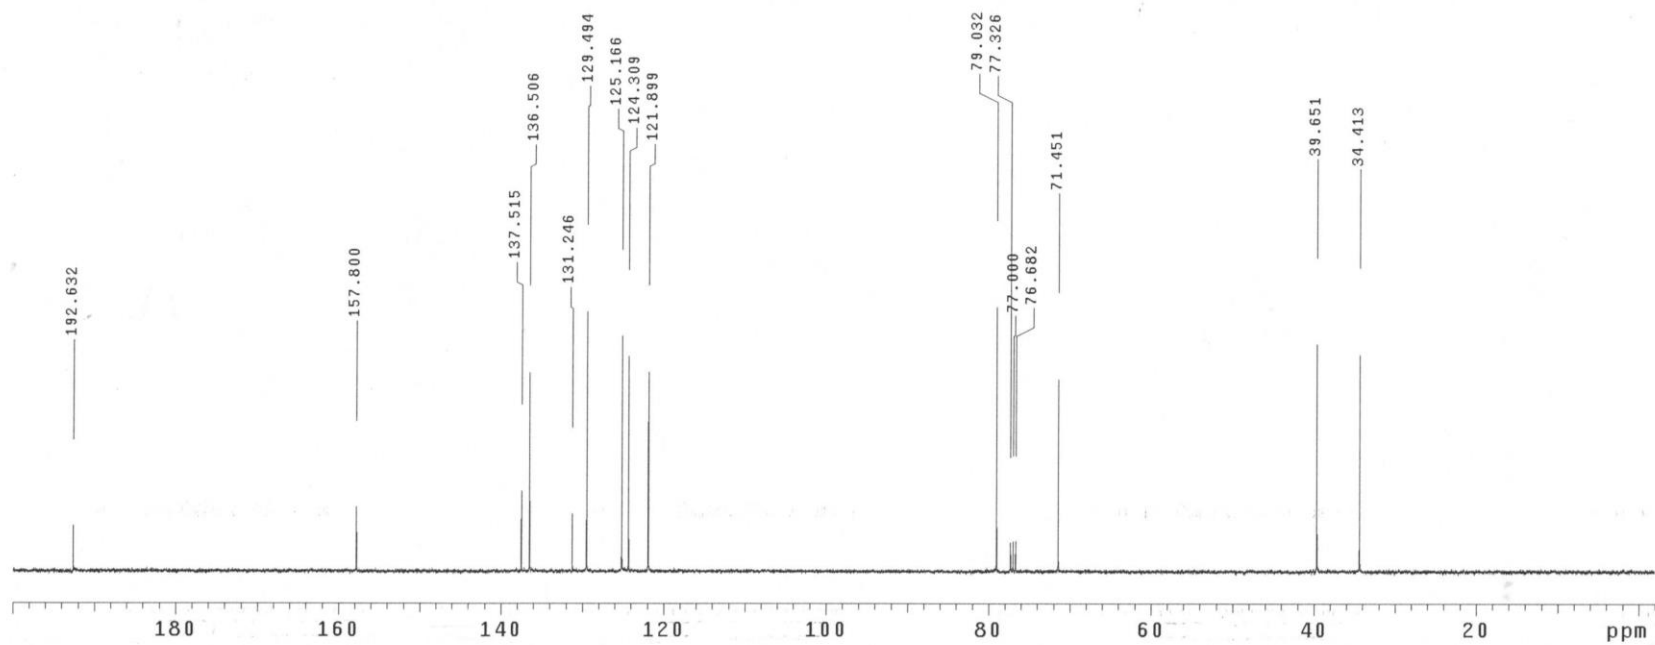

# Compound 4b (<sup>1</sup>H-NMR spectral data)

NC1081217

Pulse Sequence: s2pu1  
 UNITYplus-400 "unity400"  
 Date: Dec 23 2019  
 Solvent: CDC13  
 Ambient temperature  
 Total 32 repetitions

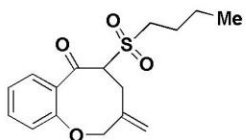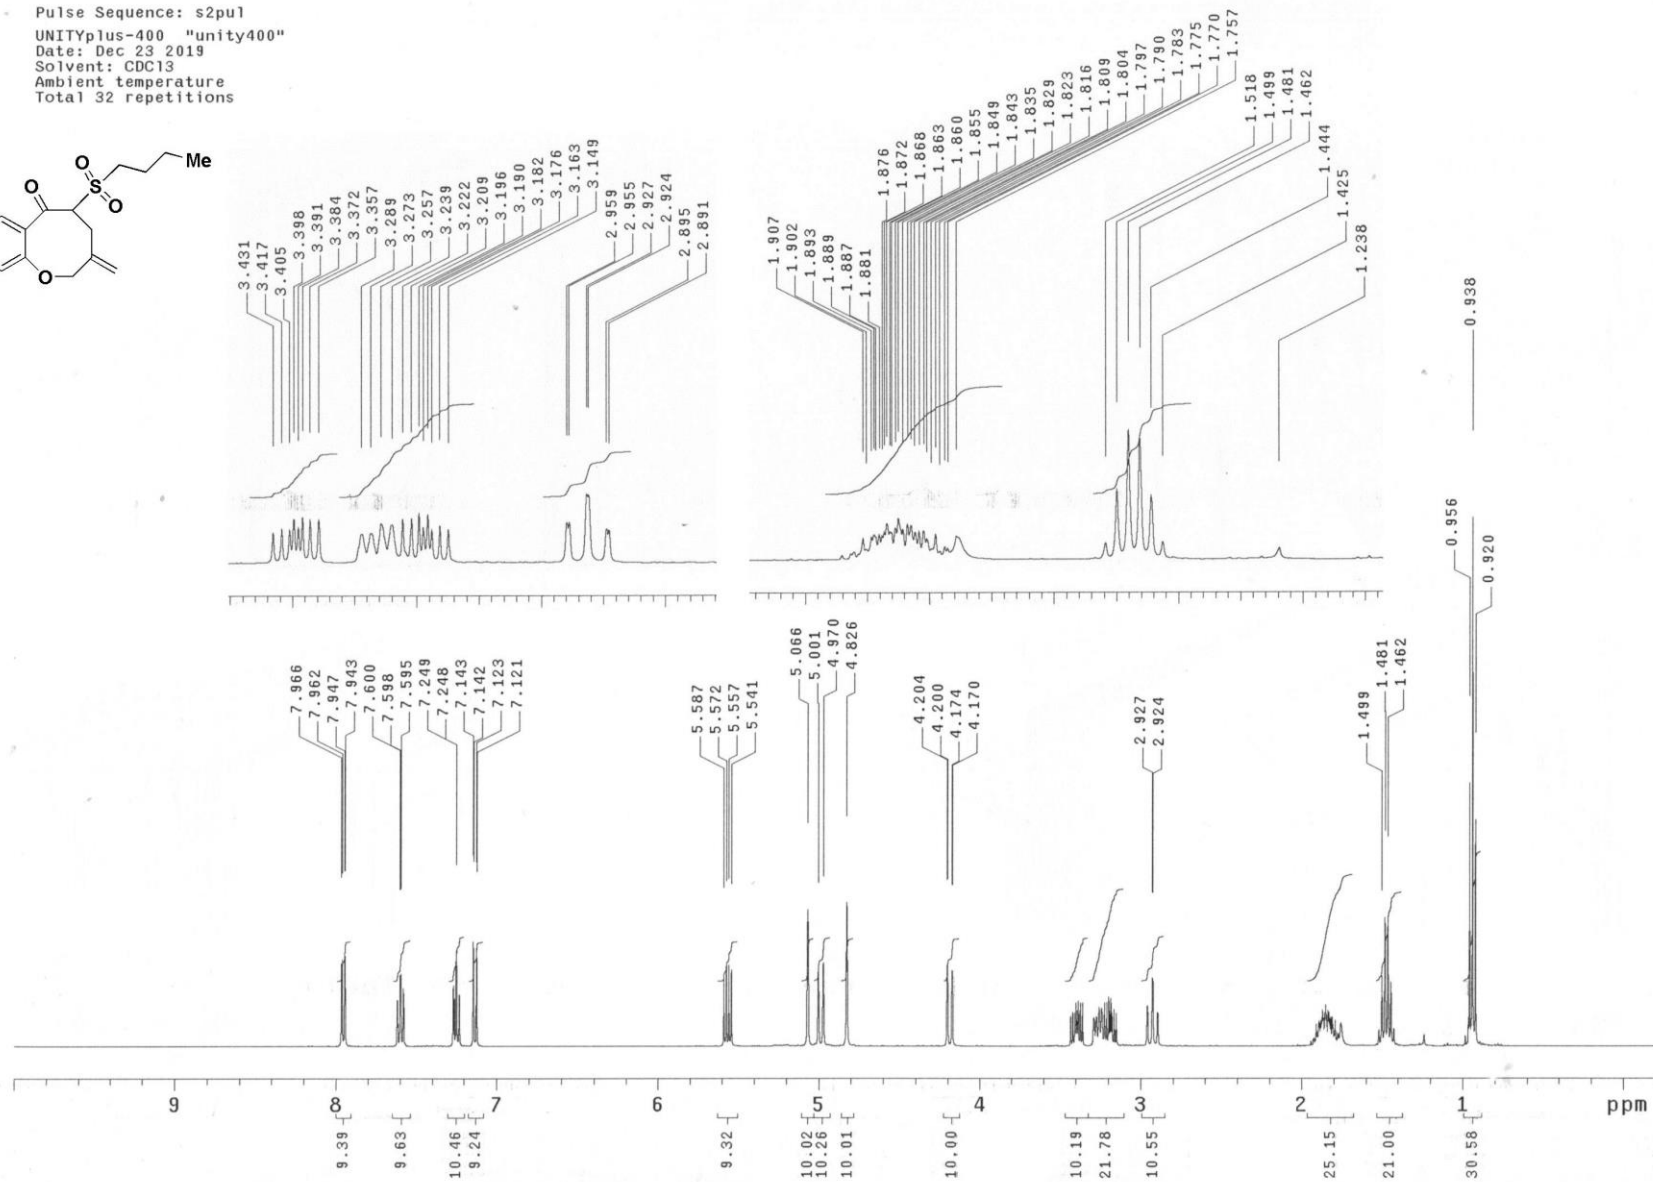

# Compound 4b (<sup>13</sup>C-NMR spectral data)

NC1081217

Pulse Sequence: s2pu1  
UNITYplus-400 "unity400"  
Date: Dec 23 2019  
Solvent: CDCl<sub>3</sub>  
Ambient temperature  
Total 224 repetitions

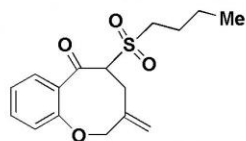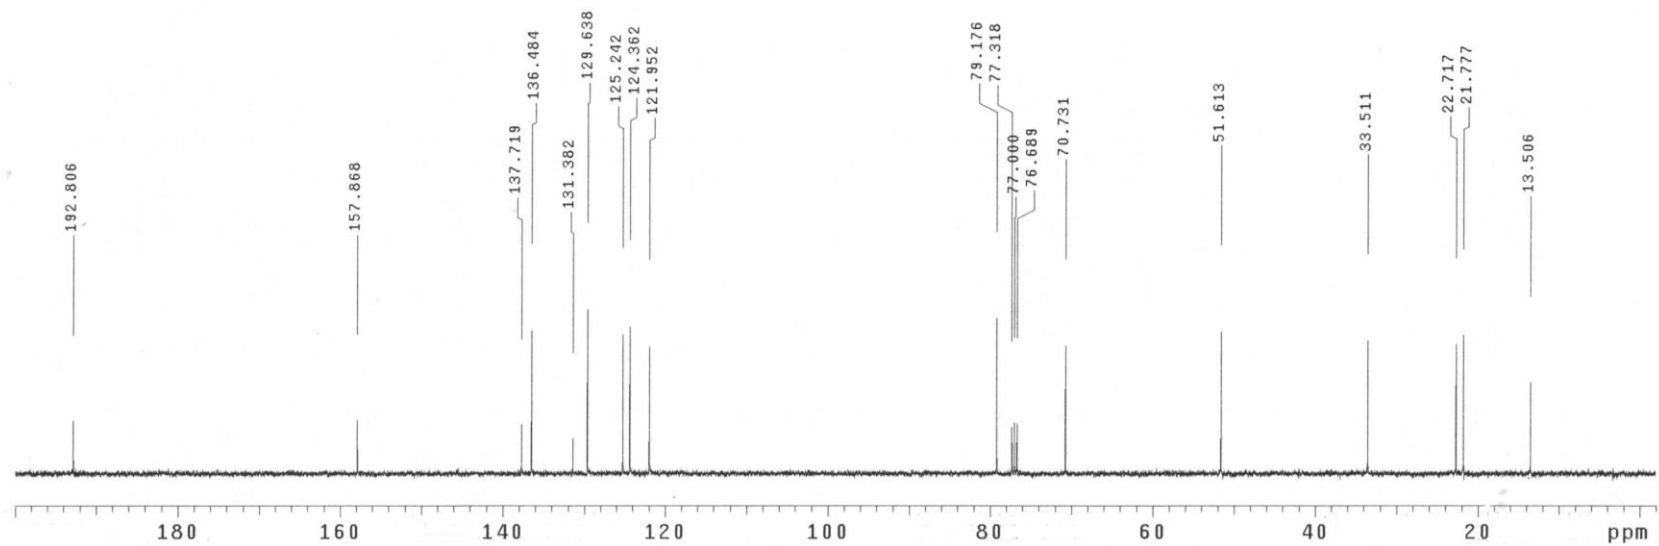

# Compound 4c (<sup>1</sup>H-NMR spectral data)

NC1081128

Pulse Sequence: s2pu1  
UNITYplus-400 "unity400"  
Date: Nov 28 2019  
Solvent: CDC13  
Ambient temperature  
Total 32 repetitions

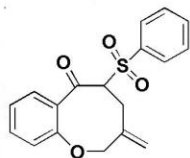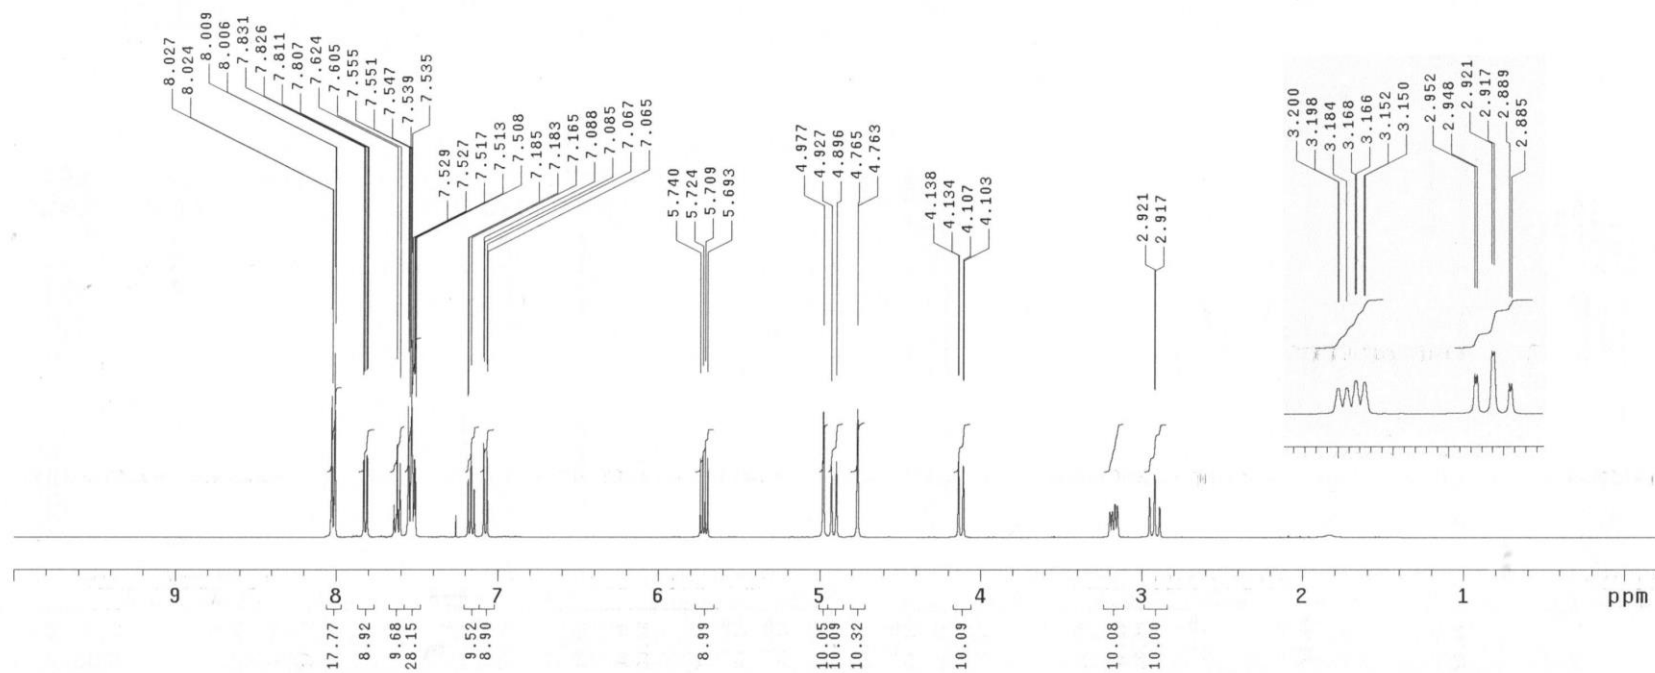

# Compound 4c (<sup>13</sup>C-NMR spectral data)

NC1081128

Pulse Sequence: s2pu1

UNITYplus-400 "unity400"

Date: Nov 28 2019

Solvent: CDC13

Ambient temperature

Total 256 repetitions

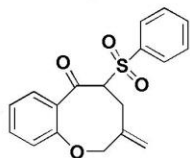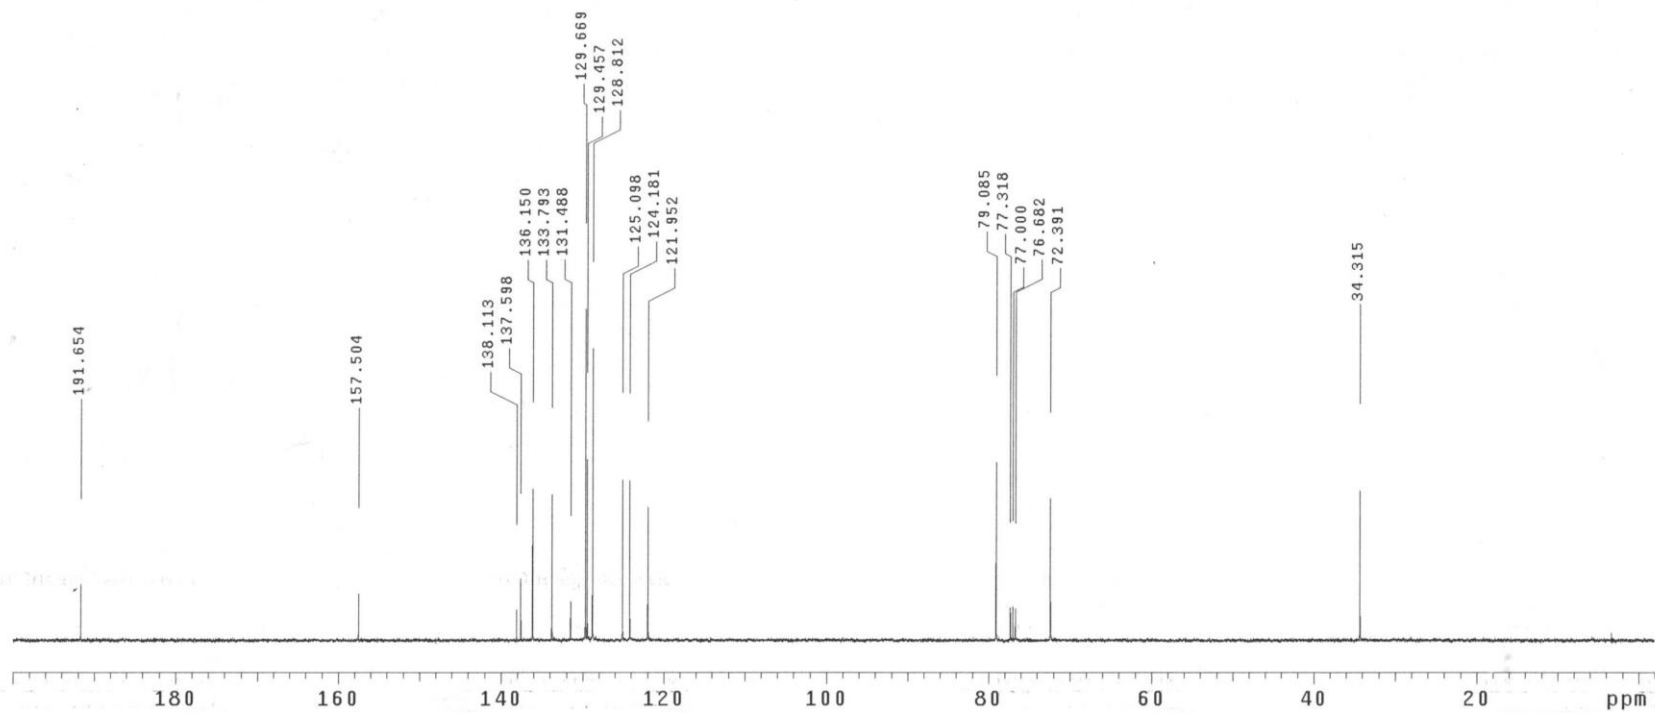

# Compound 4d (<sup>1</sup>H-NMR spectral data)

NC1081113

Pulse Sequence: s2pu1

UNITYplus-400 "unity400"

Date: Nov 13 2019

Solvent: CDC13

Ambient temperature

Total 32 repetitions

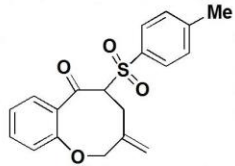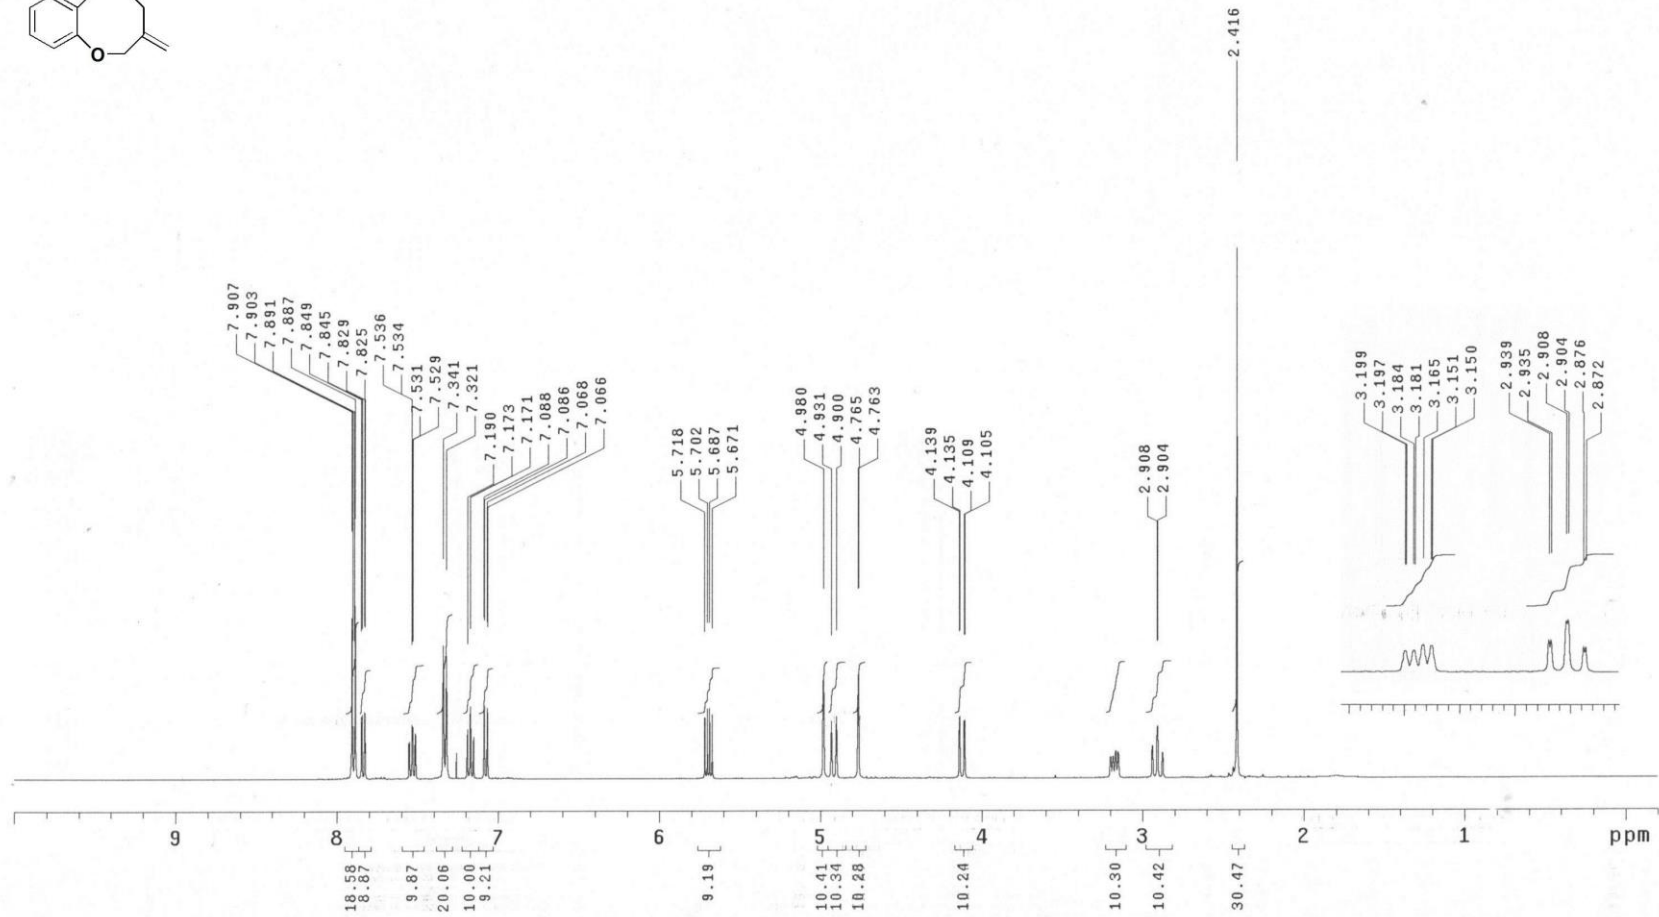



# Compound 4d (<sup>13</sup>C-NMR spectral data)

NC1081113

Pulse Sequence: s2pu1

UNITYplus-400 "unity400"

Date: Nov 13 2019

Solvent: CDC13

Ambient temperature

Total 768 repetitions

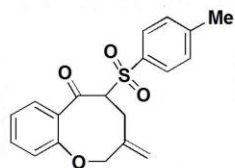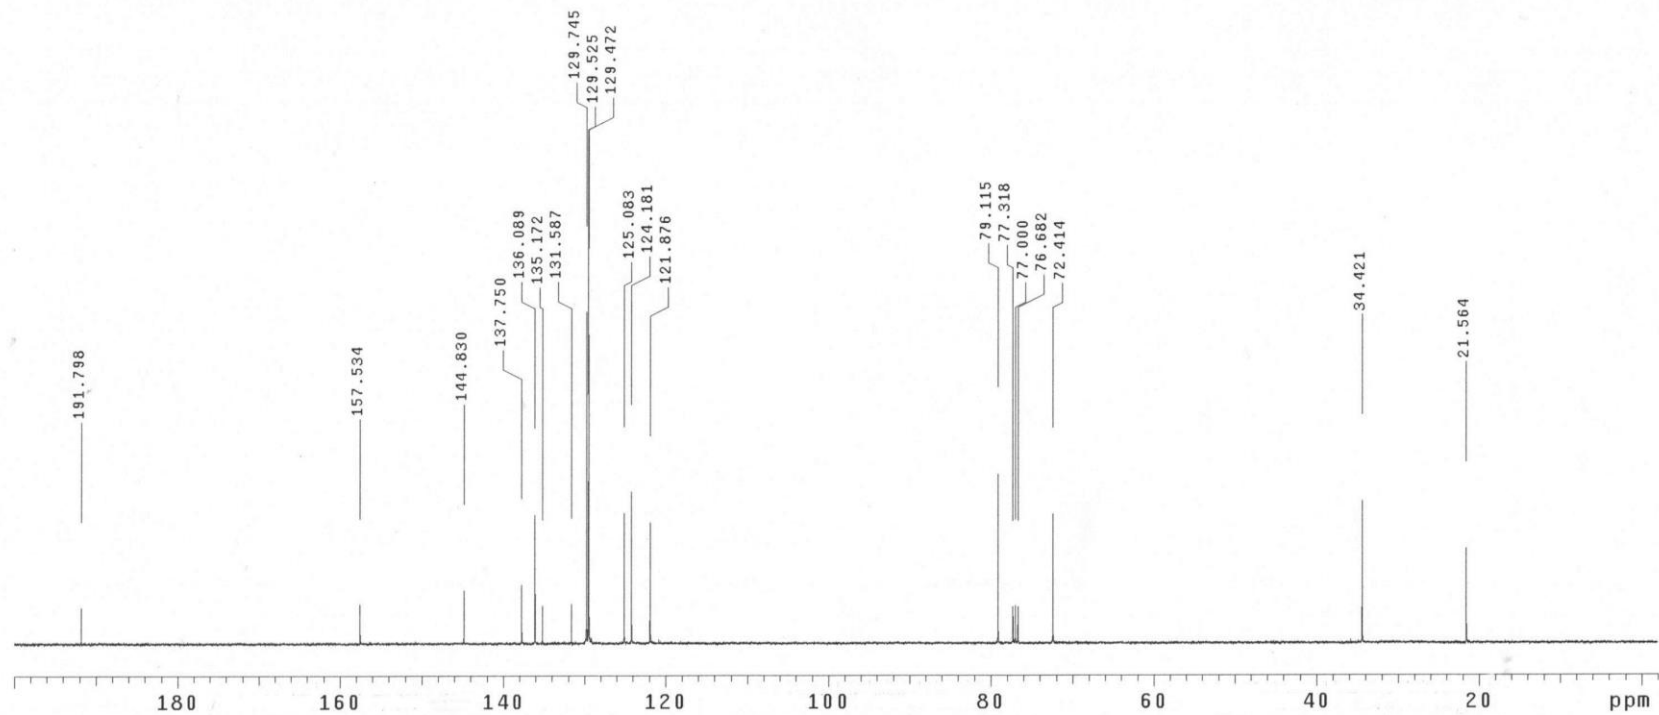

# Compound 4e (<sup>1</sup>H-NMR spectral data)

NC1081211

Pulse Sequence: s2pu1

UNITYplus-400 "unity400"

Date: Dec 12 2019

Solvent: CDCl<sub>3</sub>

Ambient temperature

Total 32 repetitions

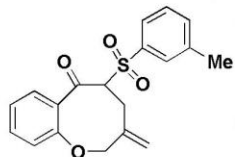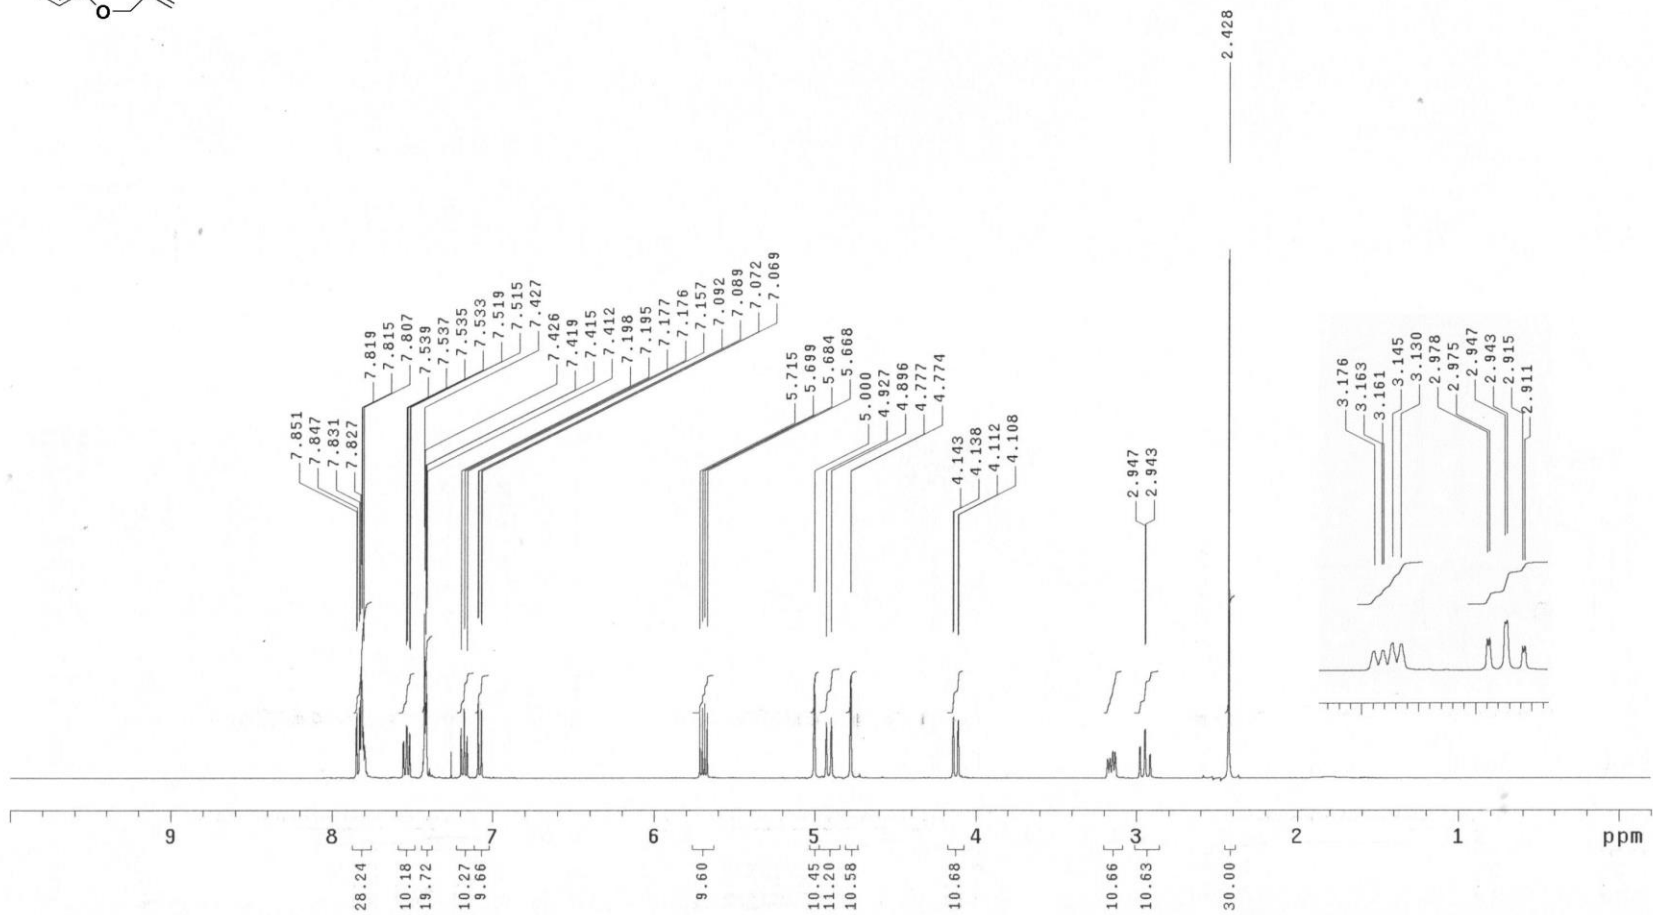

# Compound 4e (<sup>13</sup>C-NMR spectral data)

NC1081211

Pulse Sequence: s2pu1

UNITYplus-400 "unity400"

Date: Dec 12 2019

Solvent: CDCl<sub>3</sub>

Ambient temperature

Total 608 repetitions

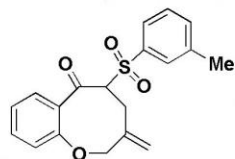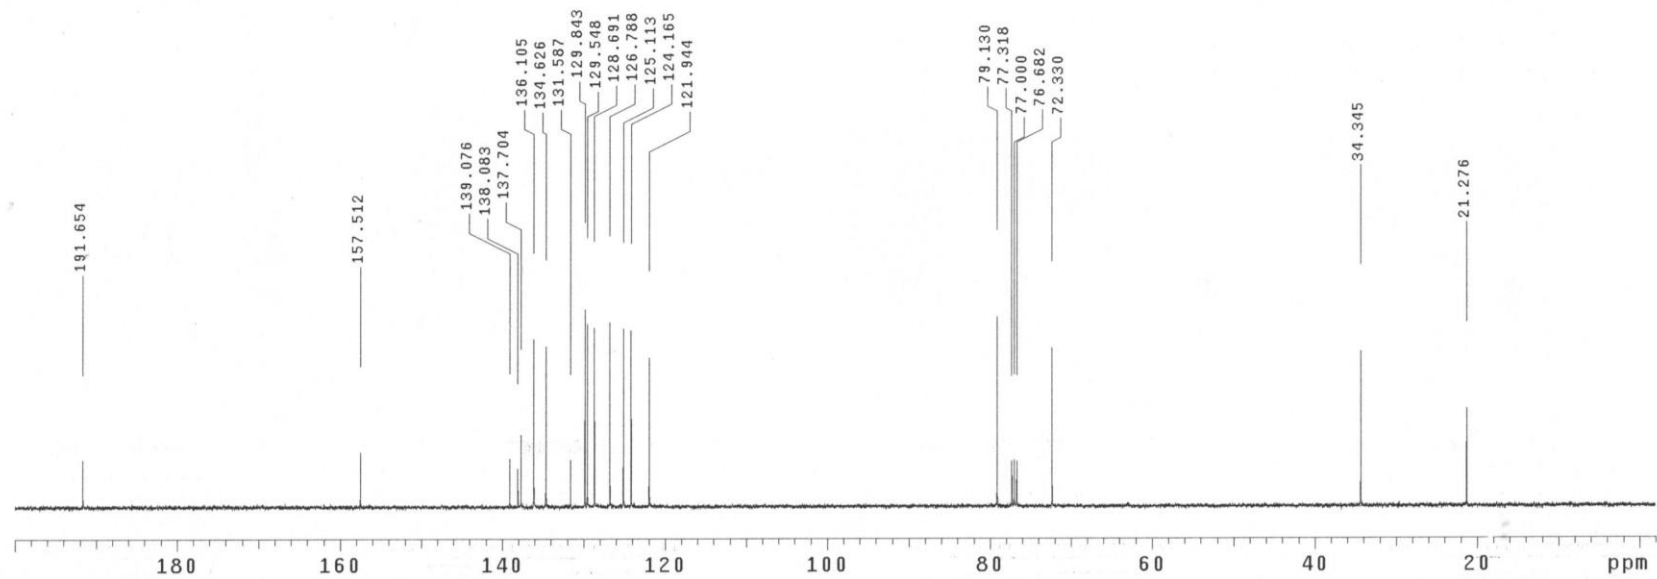

# Compound 4f (<sup>1</sup>H-NMR spectral data)

NC1081202

Pulse Sequence: s2pu1

UNITYplus-400 "unity400"

Date: Dec 3 2019

Solvent: CDCl<sub>3</sub>

Ambient temperature

Total 32 repetitions

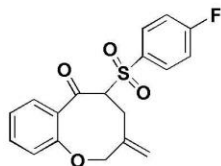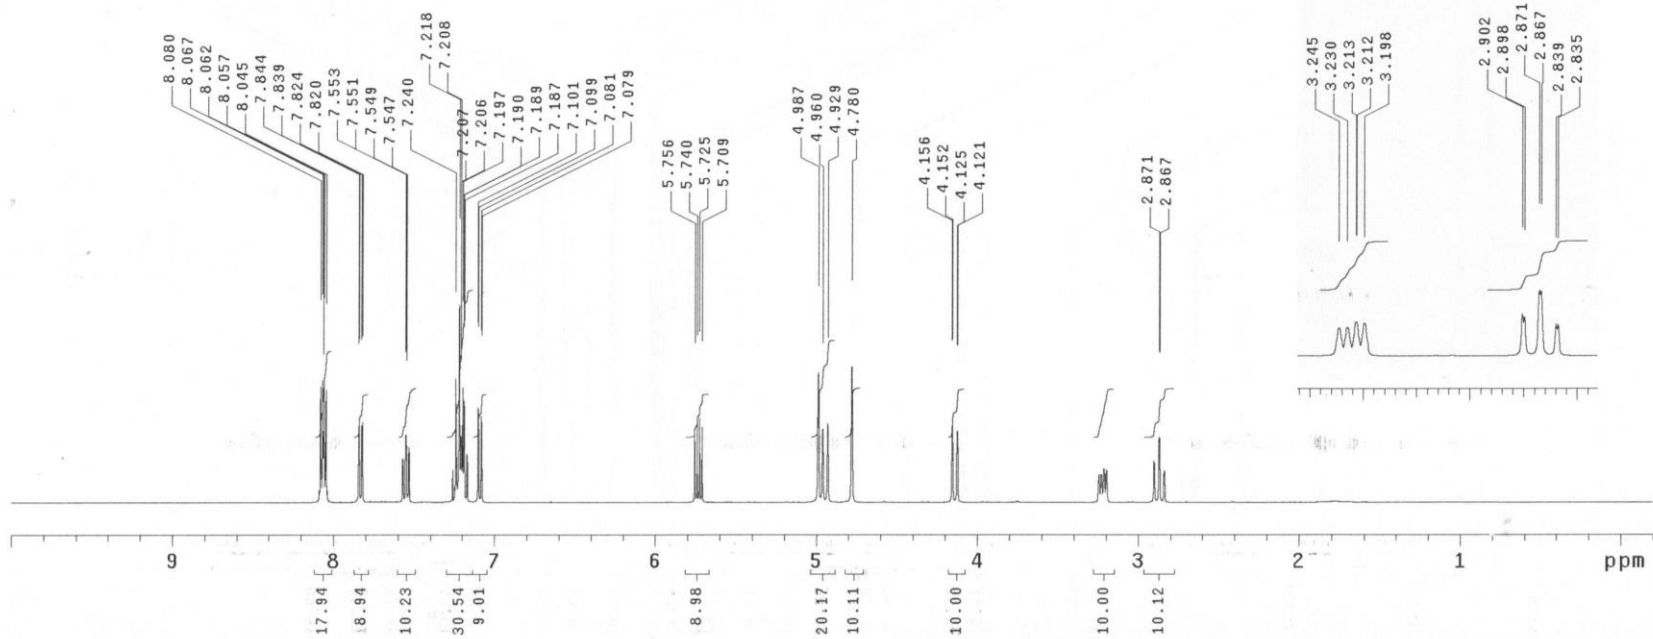

# Compound 4f (<sup>13</sup>C-NMR spectral data)

NC1081202

Pulse Sequence: s2pu1

UNITYplus-400 "unity400"

Date: Dec 3 2019

Solvent: CDCl<sub>3</sub>

Ambient temperature

Total 640 repetitions

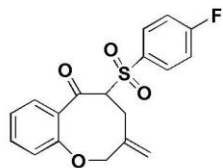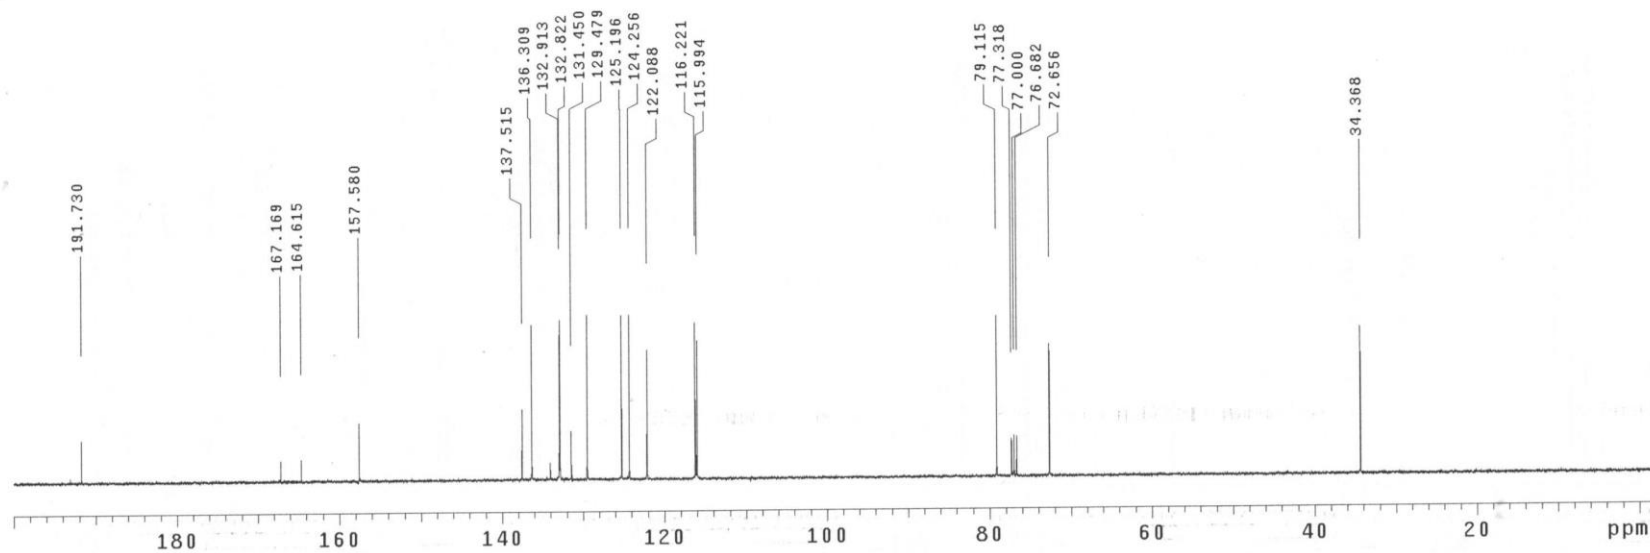

# Compound 4g (<sup>1</sup>H-NMR spectral data)

NC1081130

Pulse Sequence: s2pu1

UNITYplus-400 "unity400"

Date: Dec 2 2019

Solvent: CDC13

Ambient temperature

Total 32 repetitions

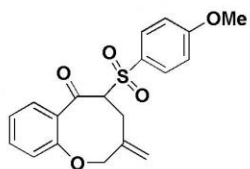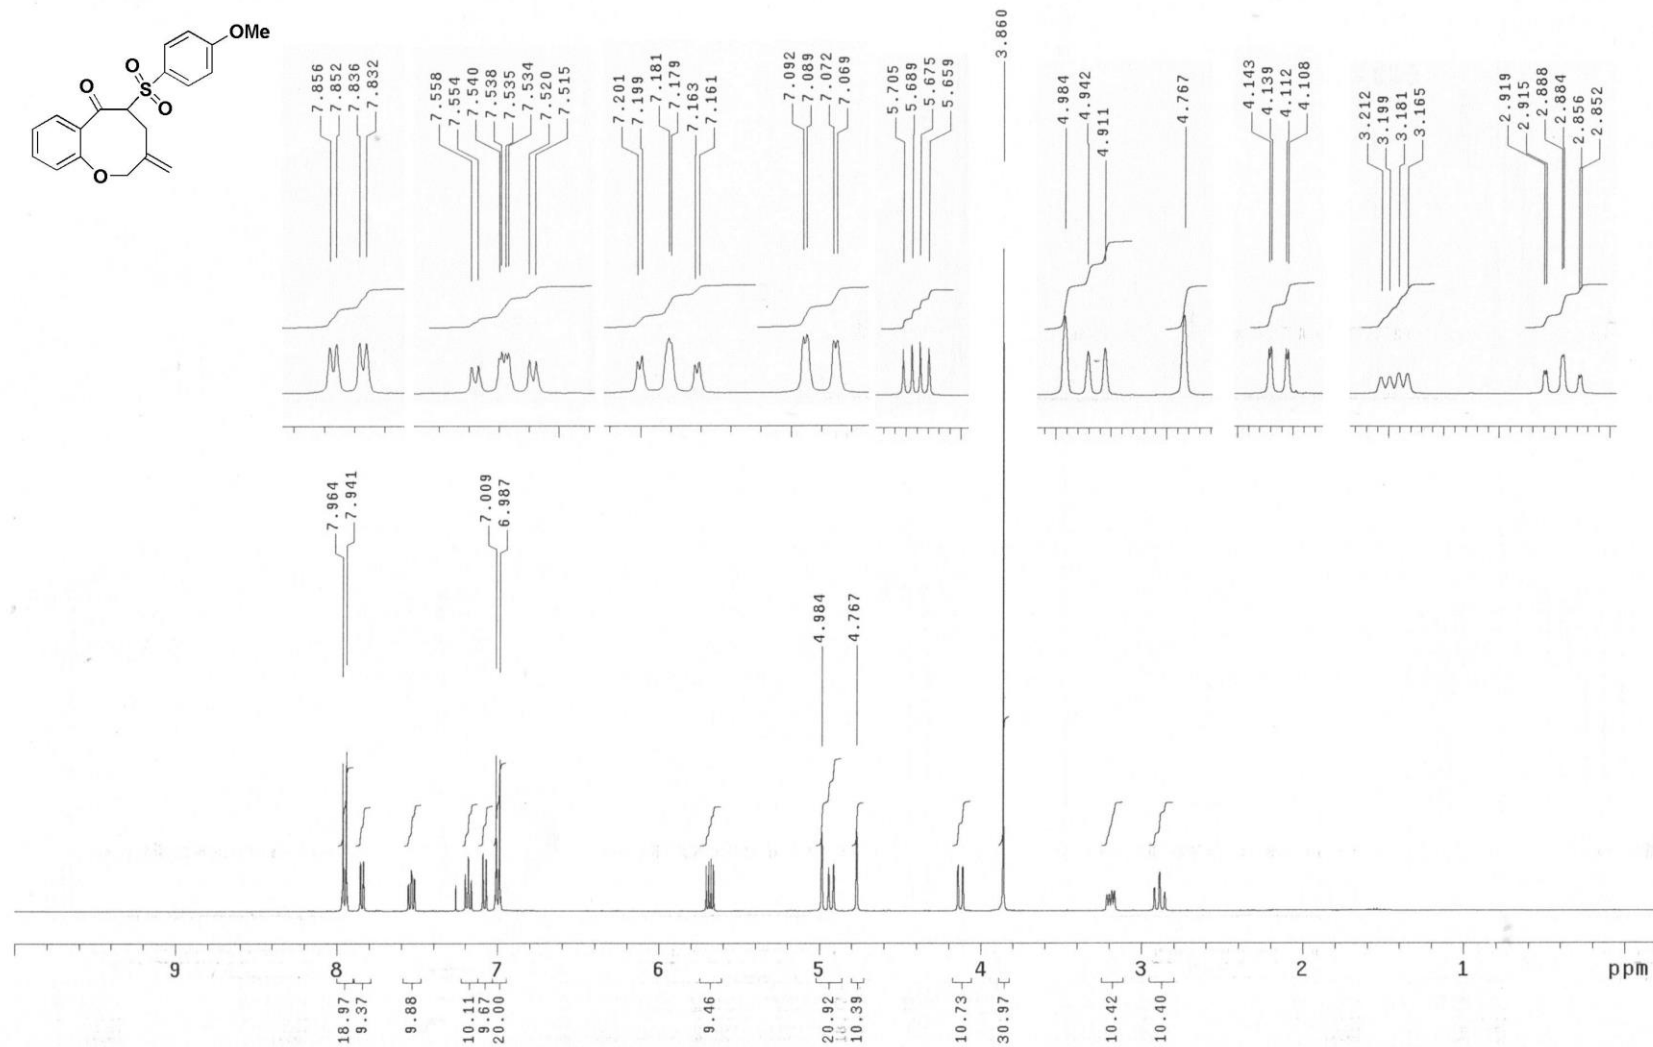

# Compound 4g (<sup>13</sup>C-NMR spectral data)

NC1081130

Pulse Sequence: s2pu1

UNITYplus-400 "unity400"

Date: Dec 2 2019

Solvent: CDCl<sub>3</sub>

Ambient temperature

Total 208 repetitions

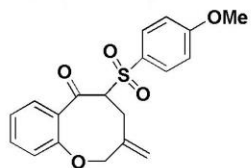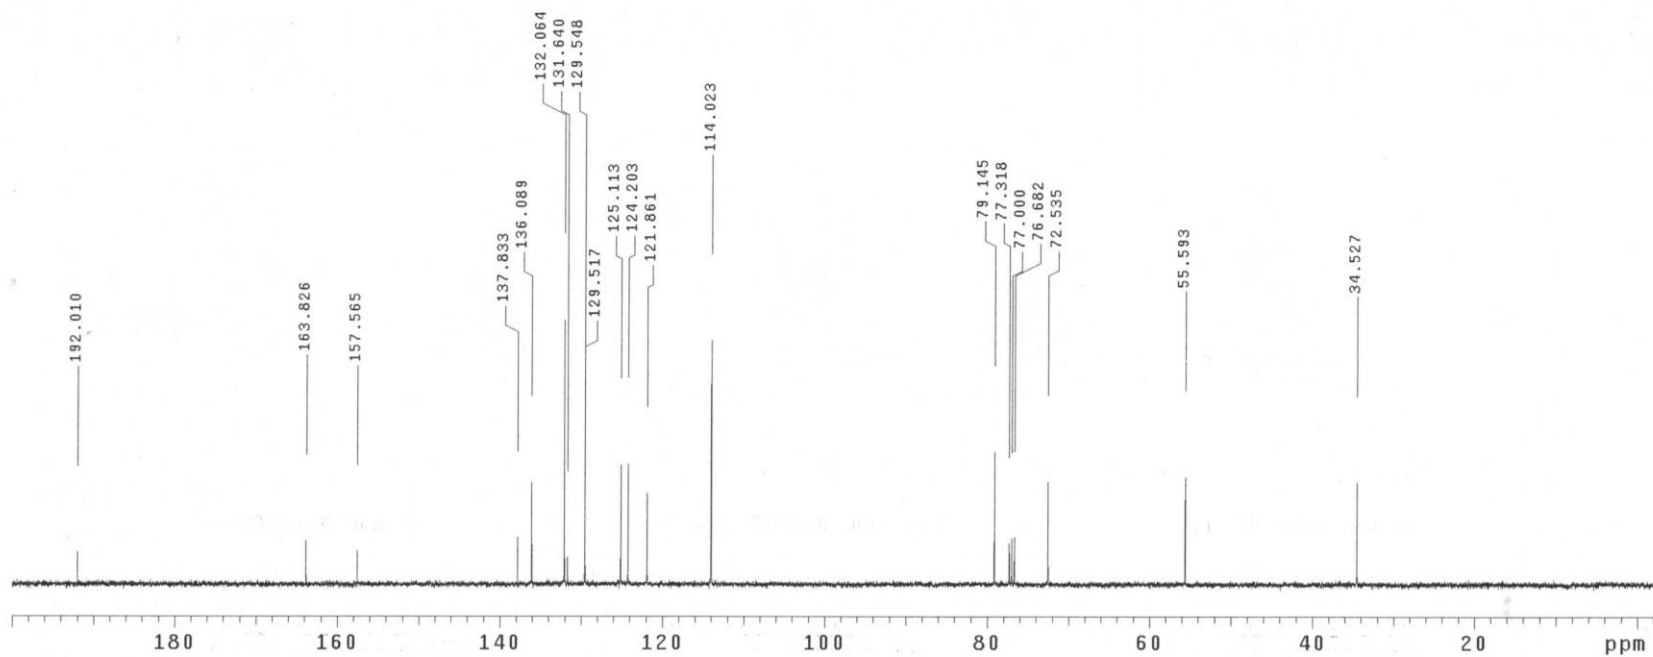

# Compound 4h (<sup>1</sup>H-NMR spectral data)

NC1081220

Pulse Sequence: s2pu1

UNITYplus-400 "unity400"

Date: Dec 20 2019

Solvent: CDCl<sub>3</sub>

Ambient temperature

Total 32 repetitions

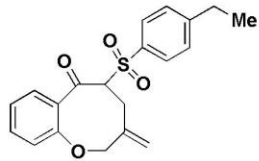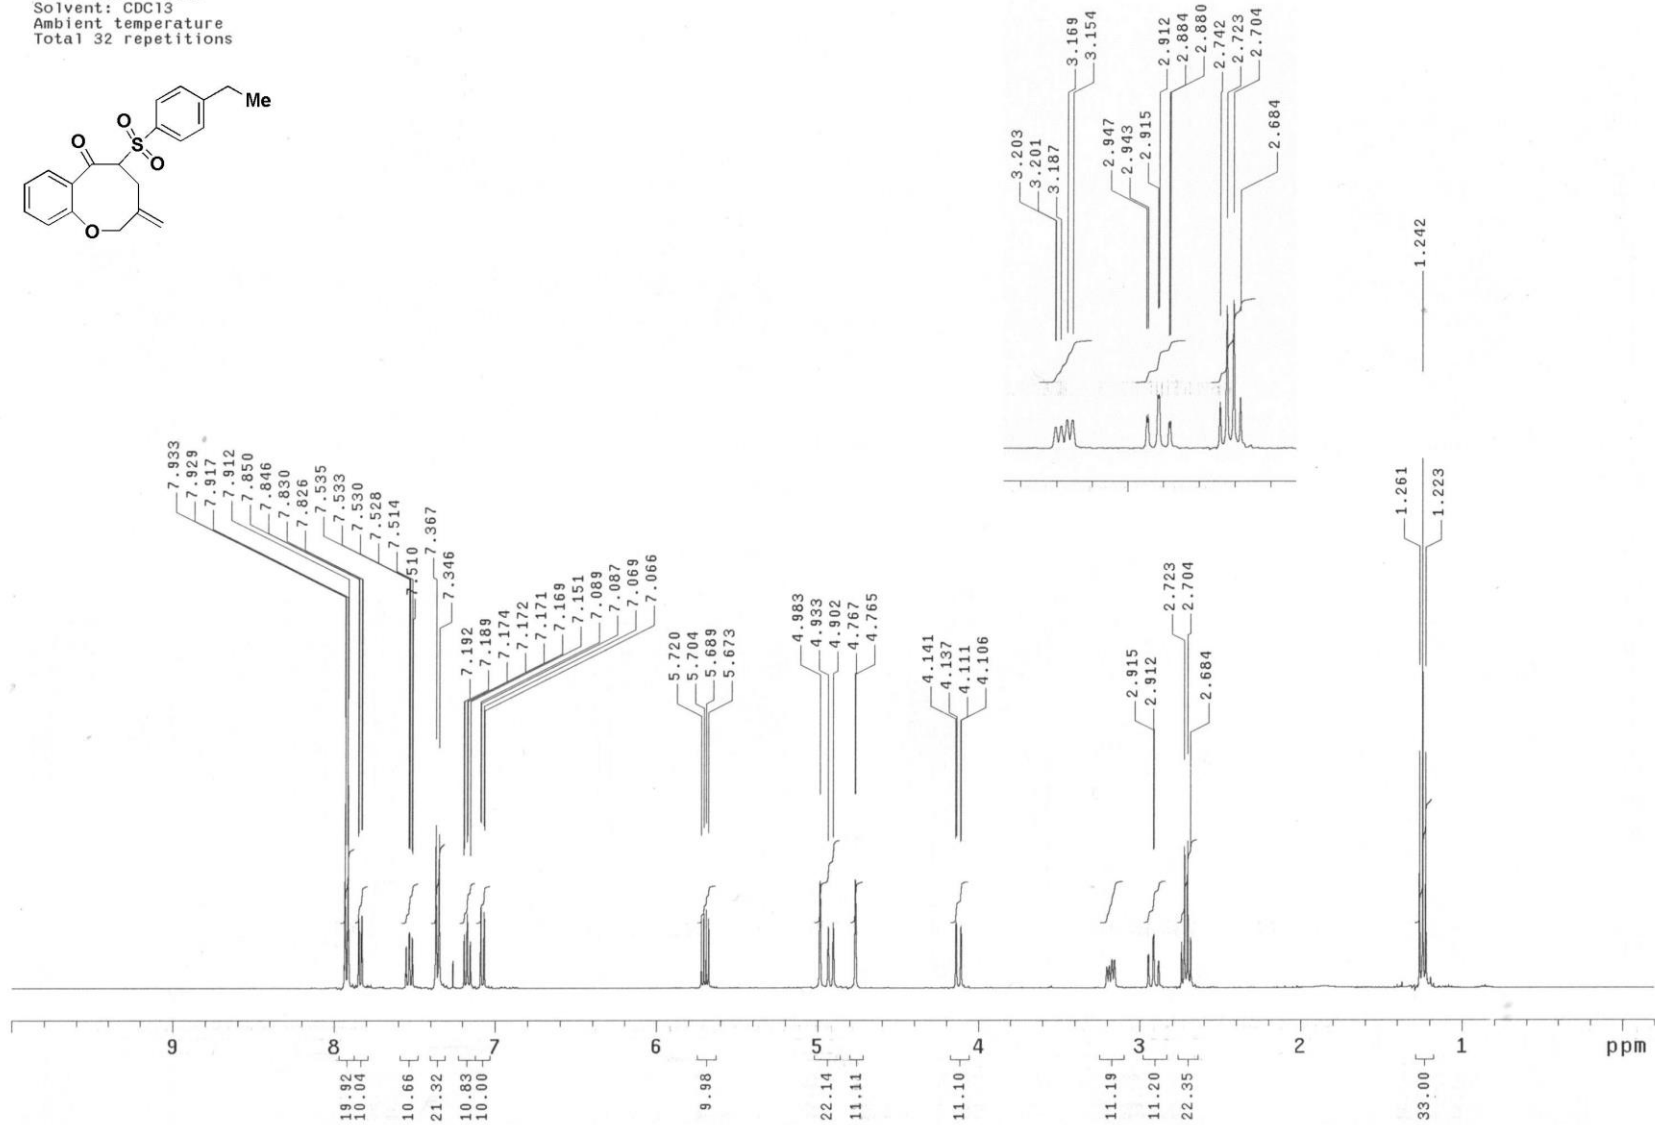



# Compound 4h (<sup>13</sup>C-NMR spectral data)

NC1081220

Pulse Sequence: s2pu1

UNITYplus-400 "unity400"

Date: Dec 20 2019

Solvent: CDCl<sub>3</sub>

Ambient temperature

Total 512 repetitions

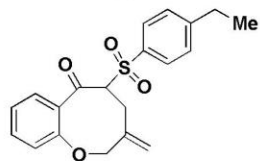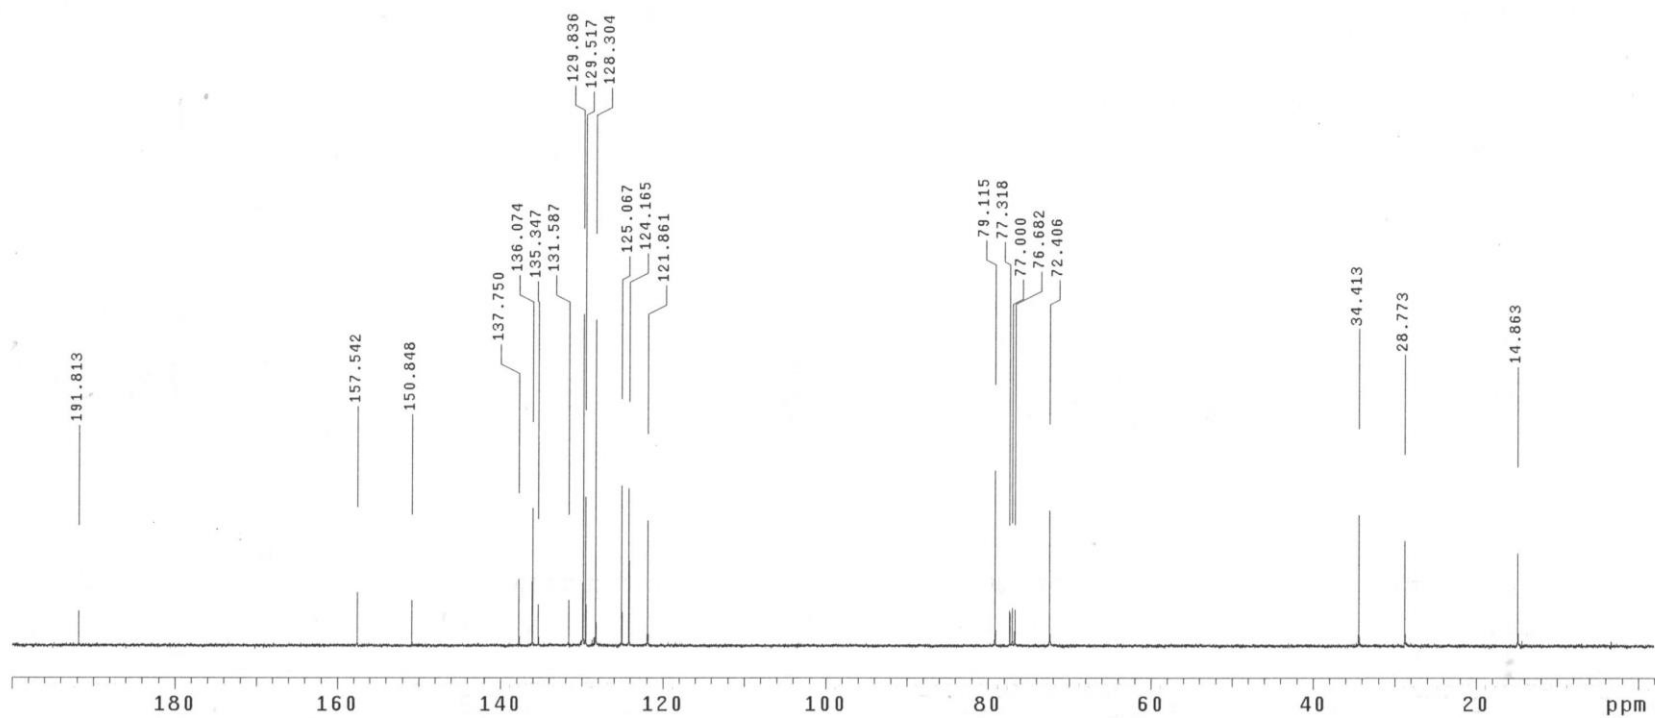

# Compound 4i (<sup>1</sup>H-NMR spectral data)

NC1081210

Pulse Sequence: s2pu1

UNITYplus-400 "unity400"

Date: Dec 10 2019

Solvent: CDC13

Ambient temperature

Total 32 repetitions

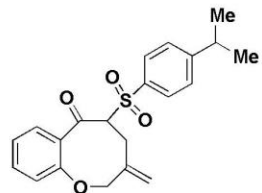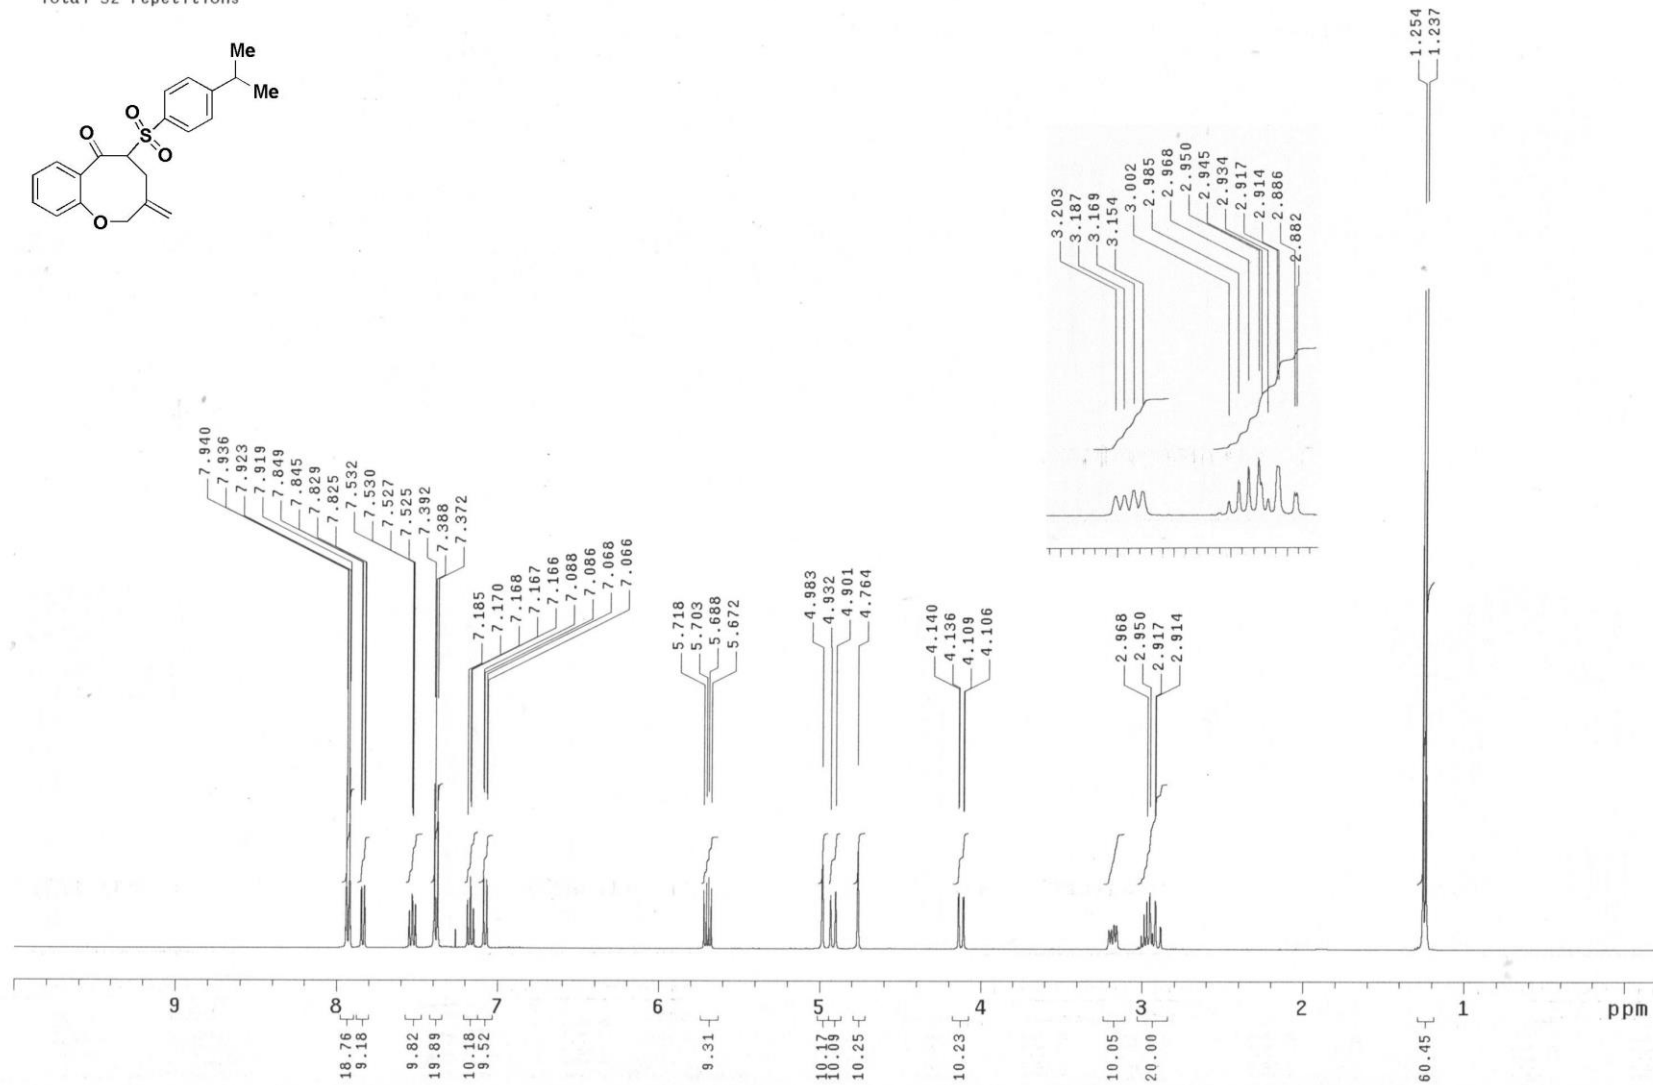

# Compound 4i (<sup>13</sup>C-NMR spectral data)

NC1081210

Pulse Sequence: s2pu1

UNITYplus-400 "unity400"

Date: Dec 10 2019

Solvent: CDC13

Ambient temperature

Total 160 repetitions

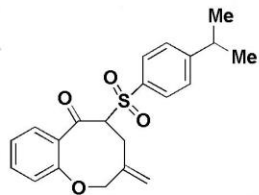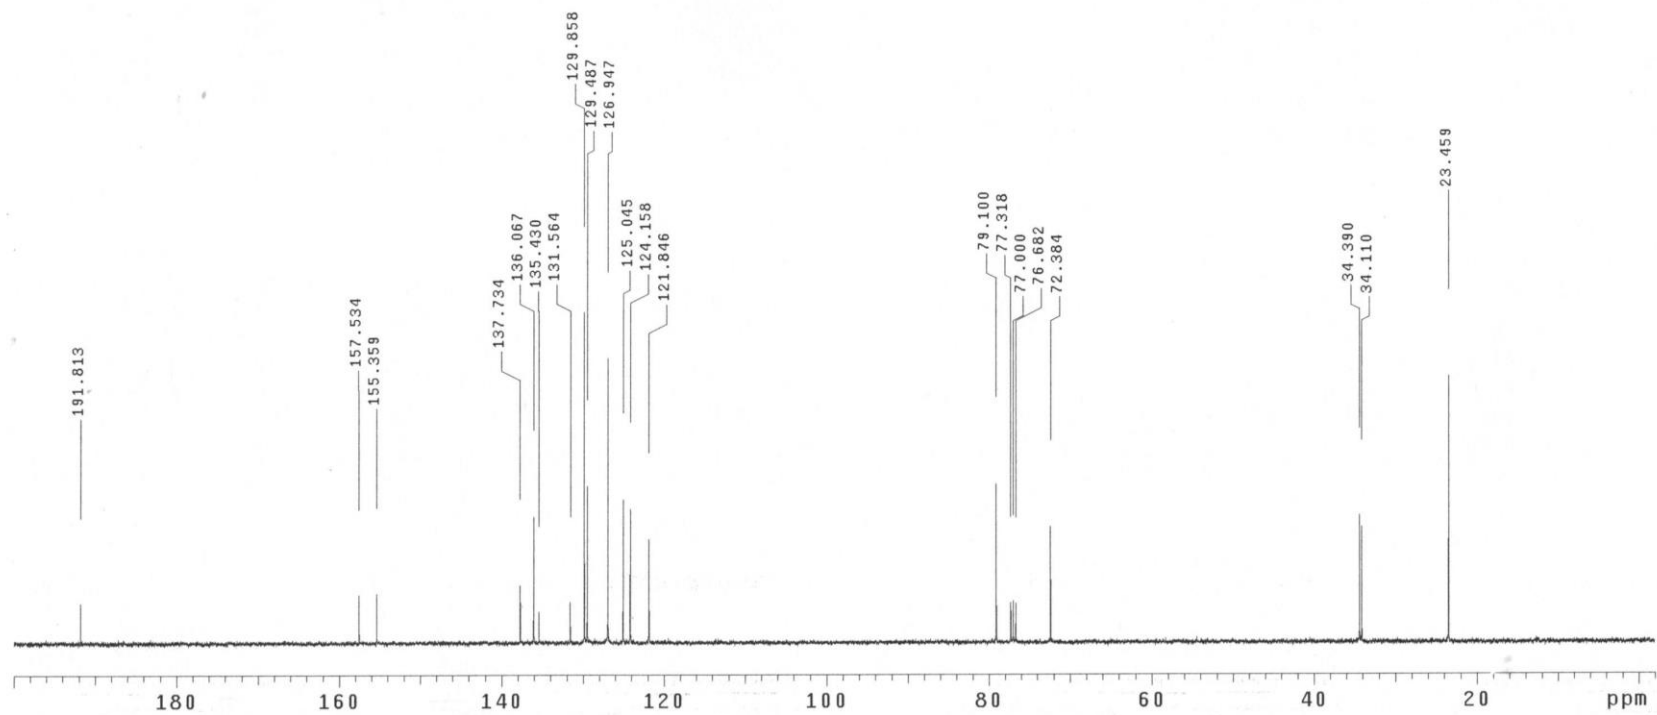

# Compound 4j (<sup>1</sup>H-NMR spectral data)

NC1081216

Pulse Sequence: s2pu1  
UNITYplus-400 "unity400"  
Date: Dec 17 2019  
Solvent: CDC13  
Ambient temperature  
Total 32 repetitions

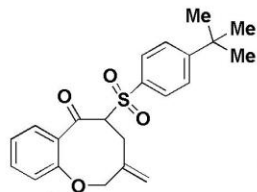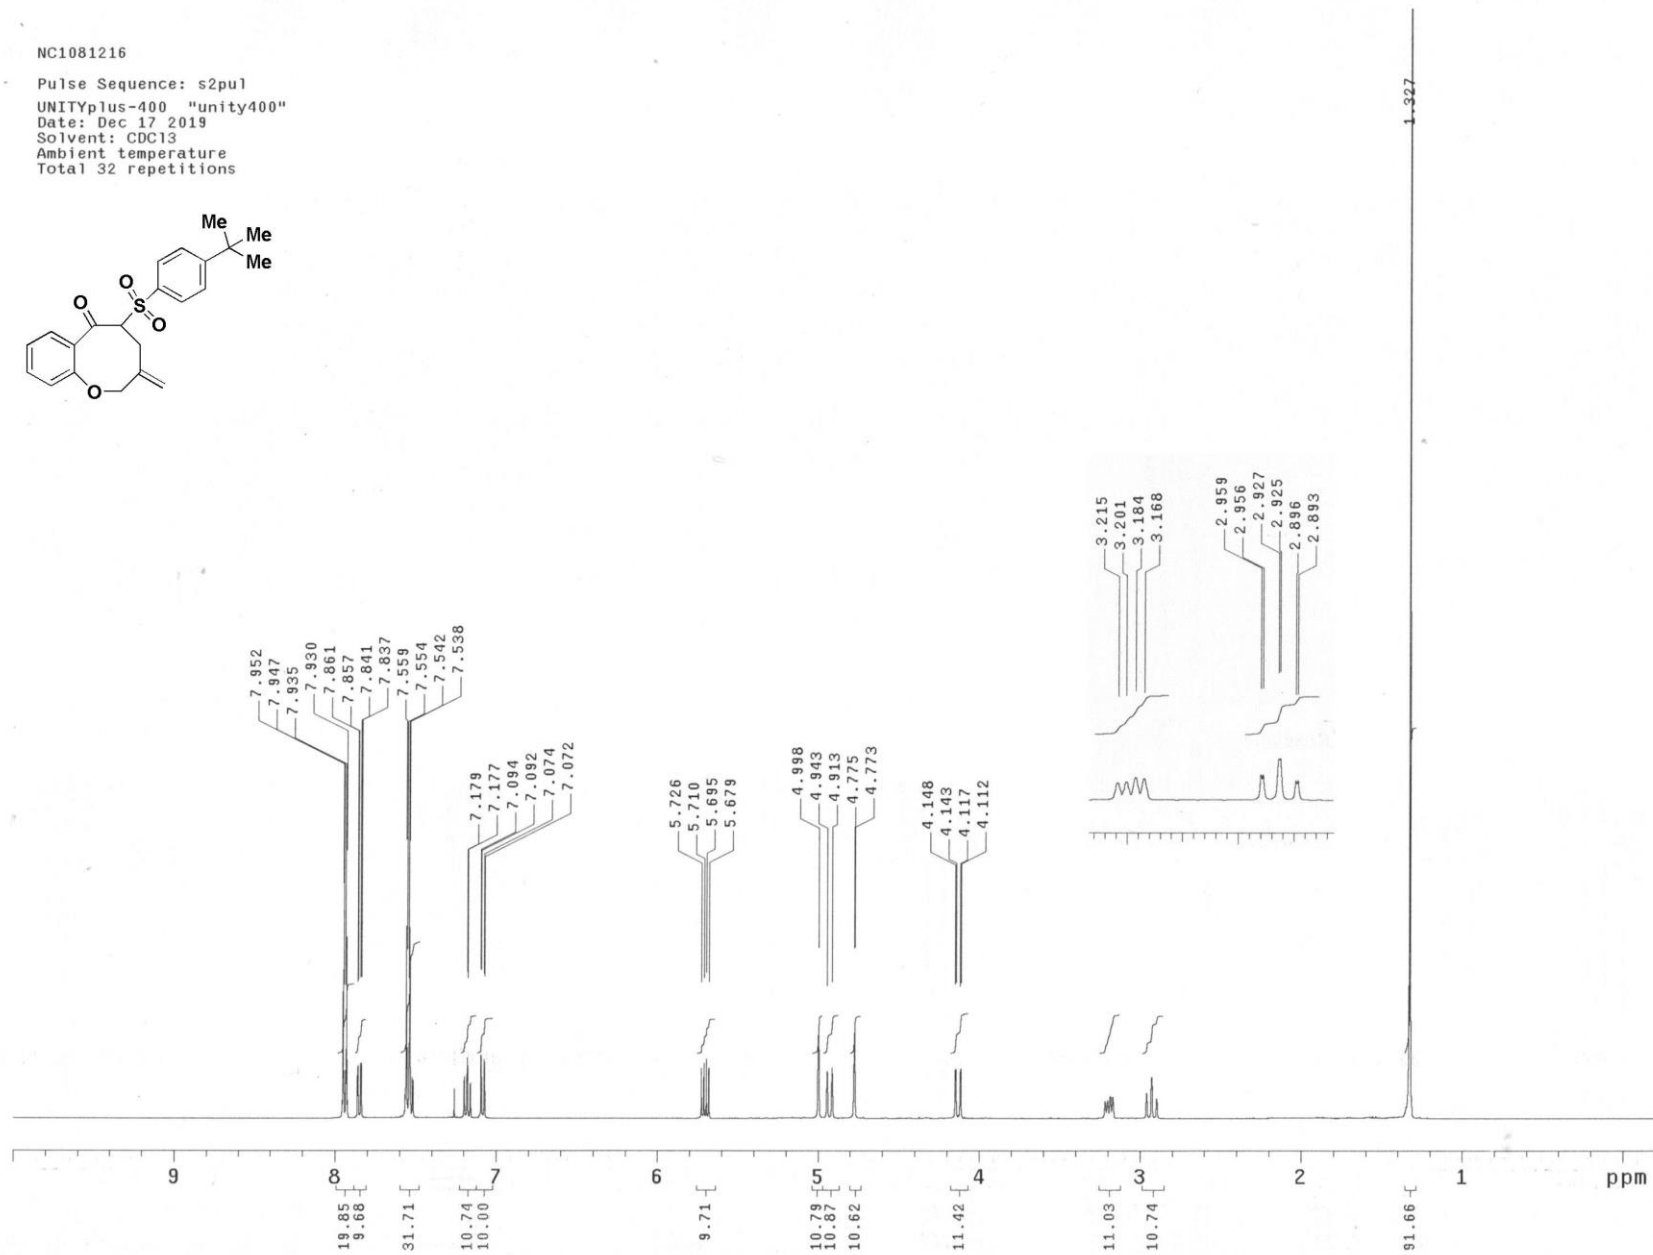

# Compound 4j (<sup>13</sup>C-NMR spectral data)

NC1081216

Pulse Sequence: s2pu1

UNITYplus-400 "unity400"

Date: Dec 17 2019

Solvent: CDC13

Ambient temperature

Total 160 repetitions

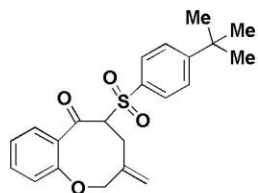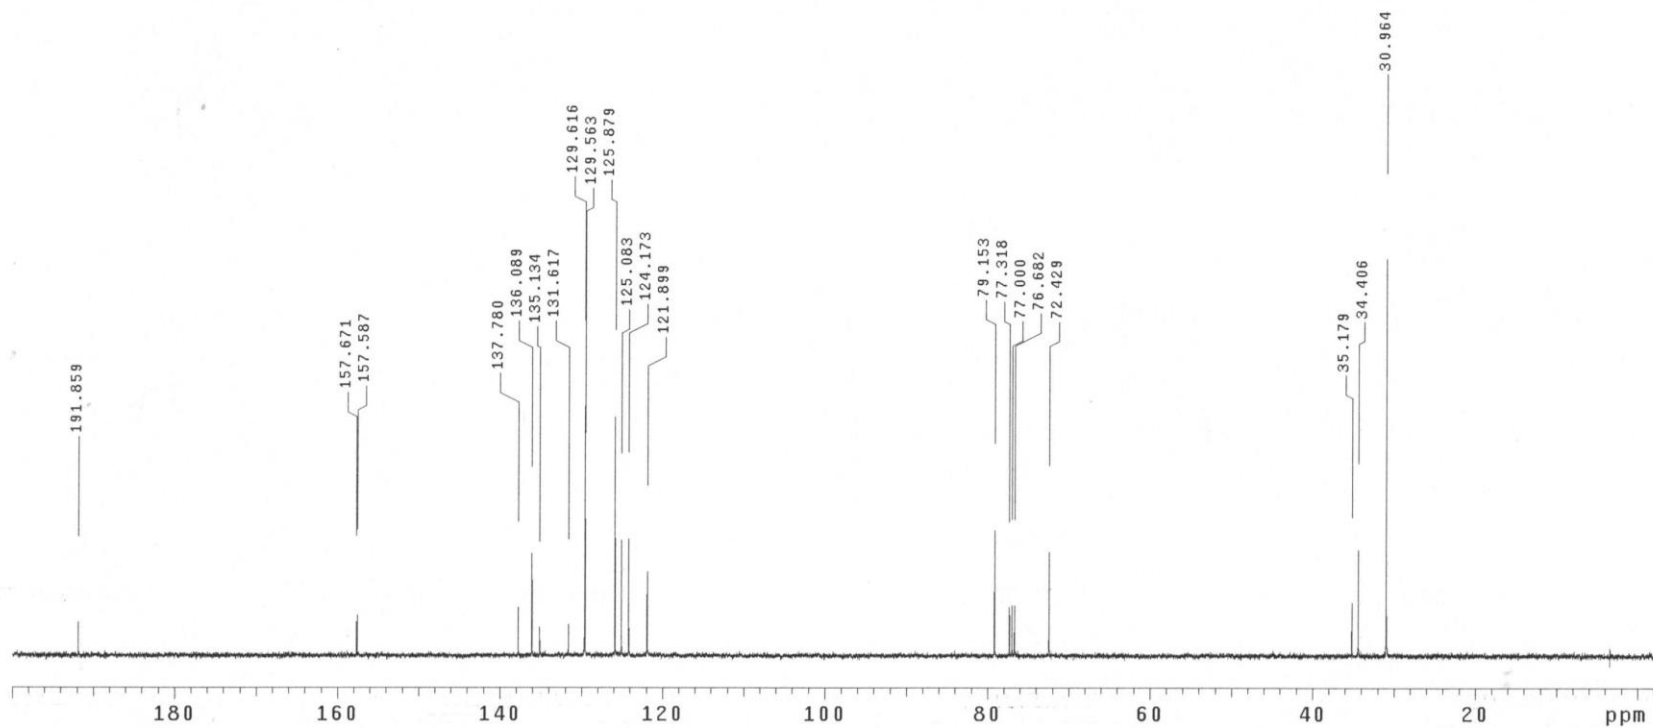

# Compound 4k (<sup>1</sup>H-NMR spectral data)

NC1081212

Pulse Sequence: s2pu1

UNITYplus-400 "unity400"

Date: Dec 13 2019

Solvent: CDCl<sub>3</sub>

Ambient temperature

Total 32 repetitions

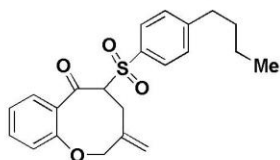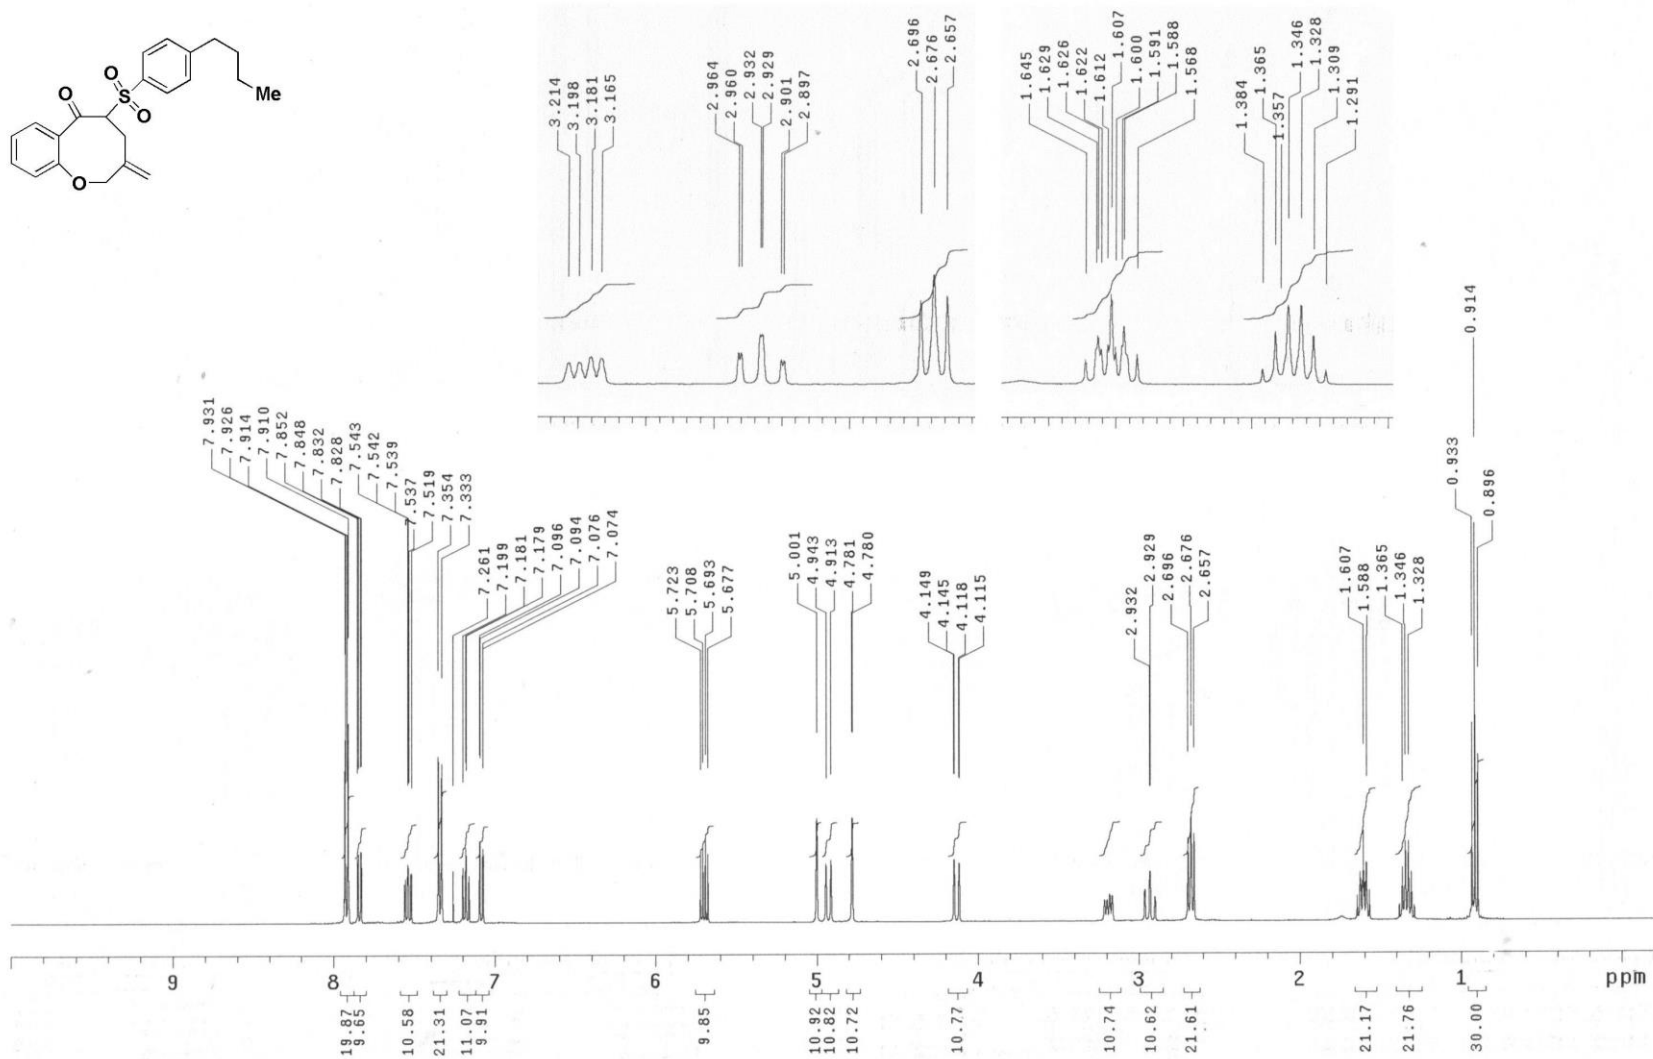

# Compound 4k (<sup>13</sup>C-NMR spectral data)

NC1081212

Pulse Sequence: s2pu1

UNITYplus-400 "unity400"

Date: Dec 13 2019

Solvent: CDC13

Ambient temperature

Total 608 repetitions

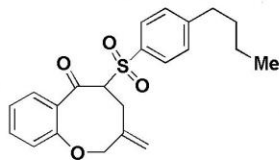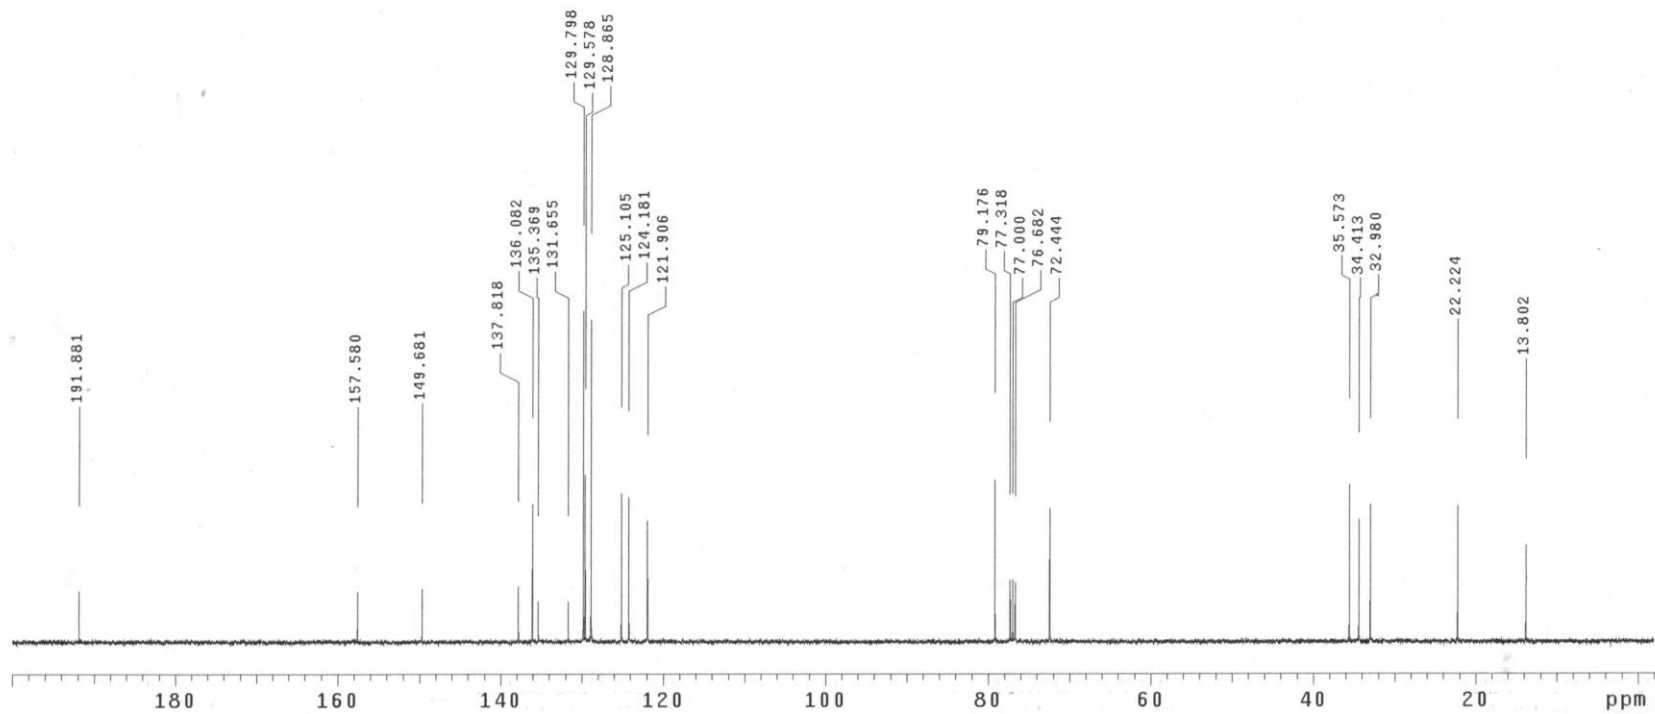

# Compound 4I (<sup>1</sup>H-NMR spectral data)

NC1081024

Pulse Sequence: s2pu1

UNITYplus-400 "unity400"

Date: Dec 5 2019

Solvent: CDC13

Ambient temperature

Total 32 repetitions

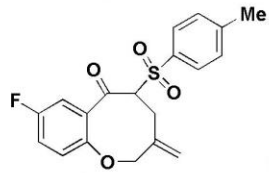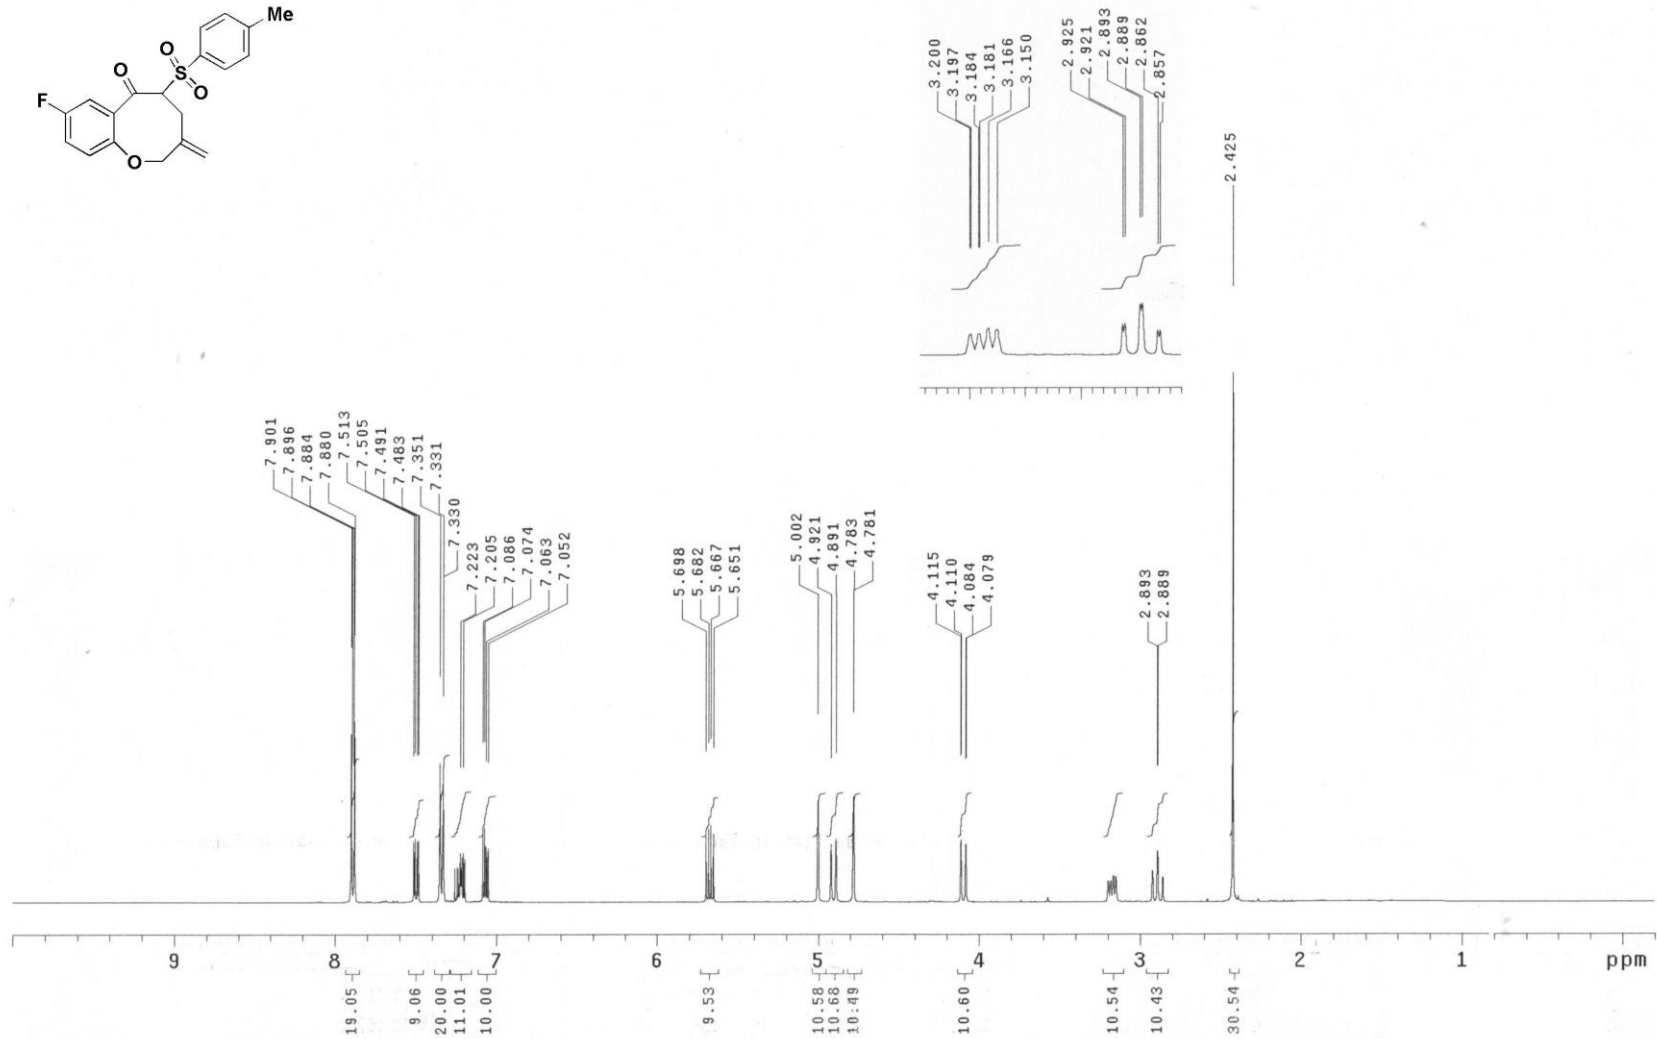



# Compound 4I (<sup>13</sup>C-NMR spectral data)

NC1081024

Pulse Sequence: s2pu1

UNITYplus-400 "unity400"

Date: Dec 5 2019

Solvent: CDCl<sub>3</sub>

Ambient temperature

Total 688 repetitions

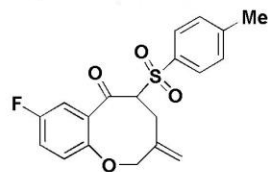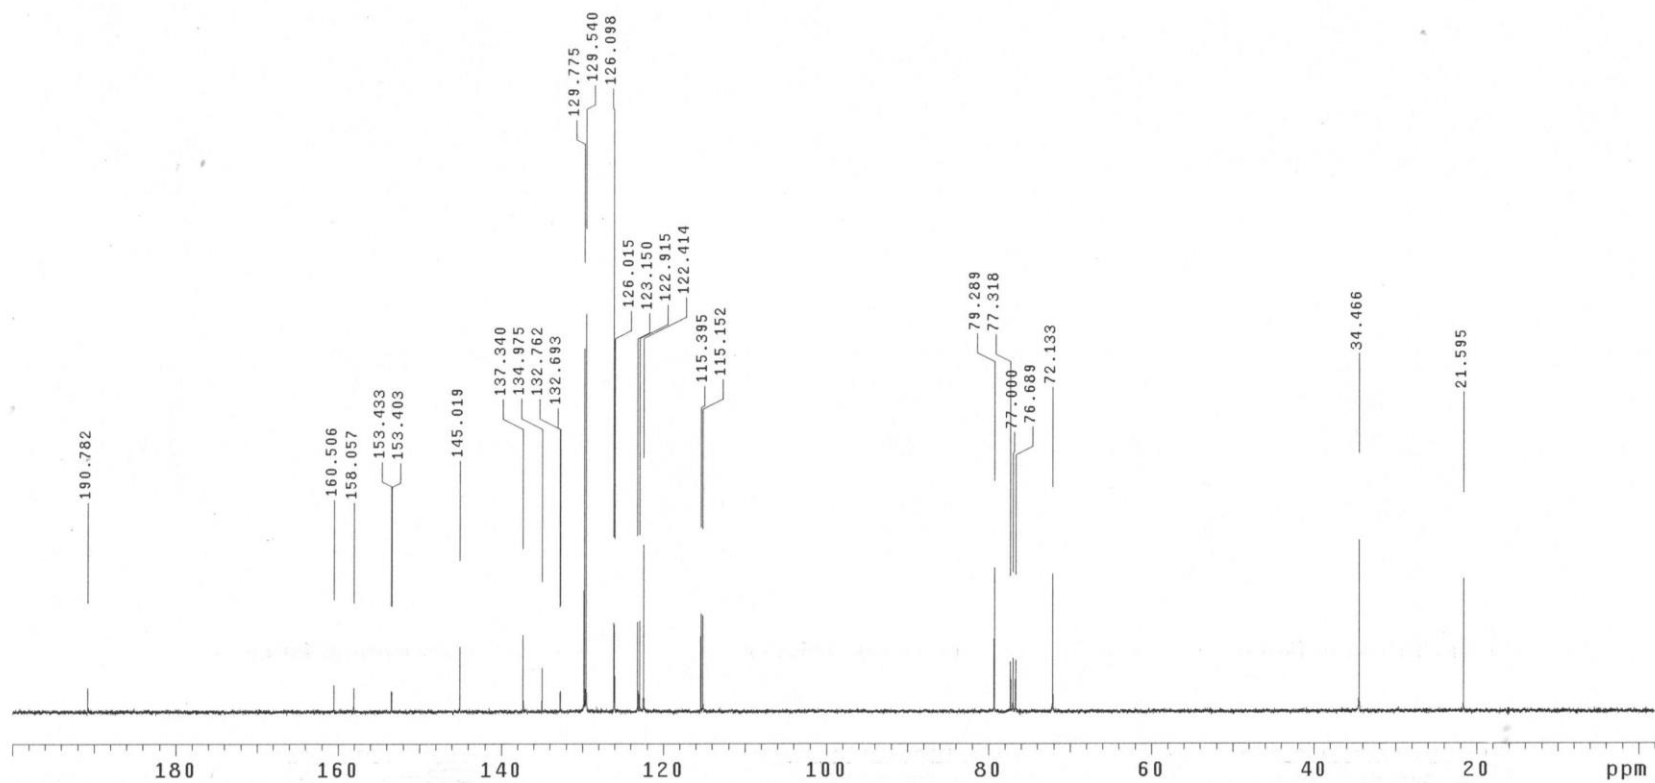

# Compound 4m (<sup>1</sup>H-NMR spectral data)

NC1090115

Pulse Sequence: s2pu1  
UNITYplus-400 "unity400"  
Date: Jan 16 2020  
Solvent: CDCl3  
Ambient temperature  
Total 32 repetitions

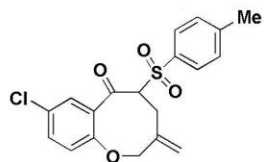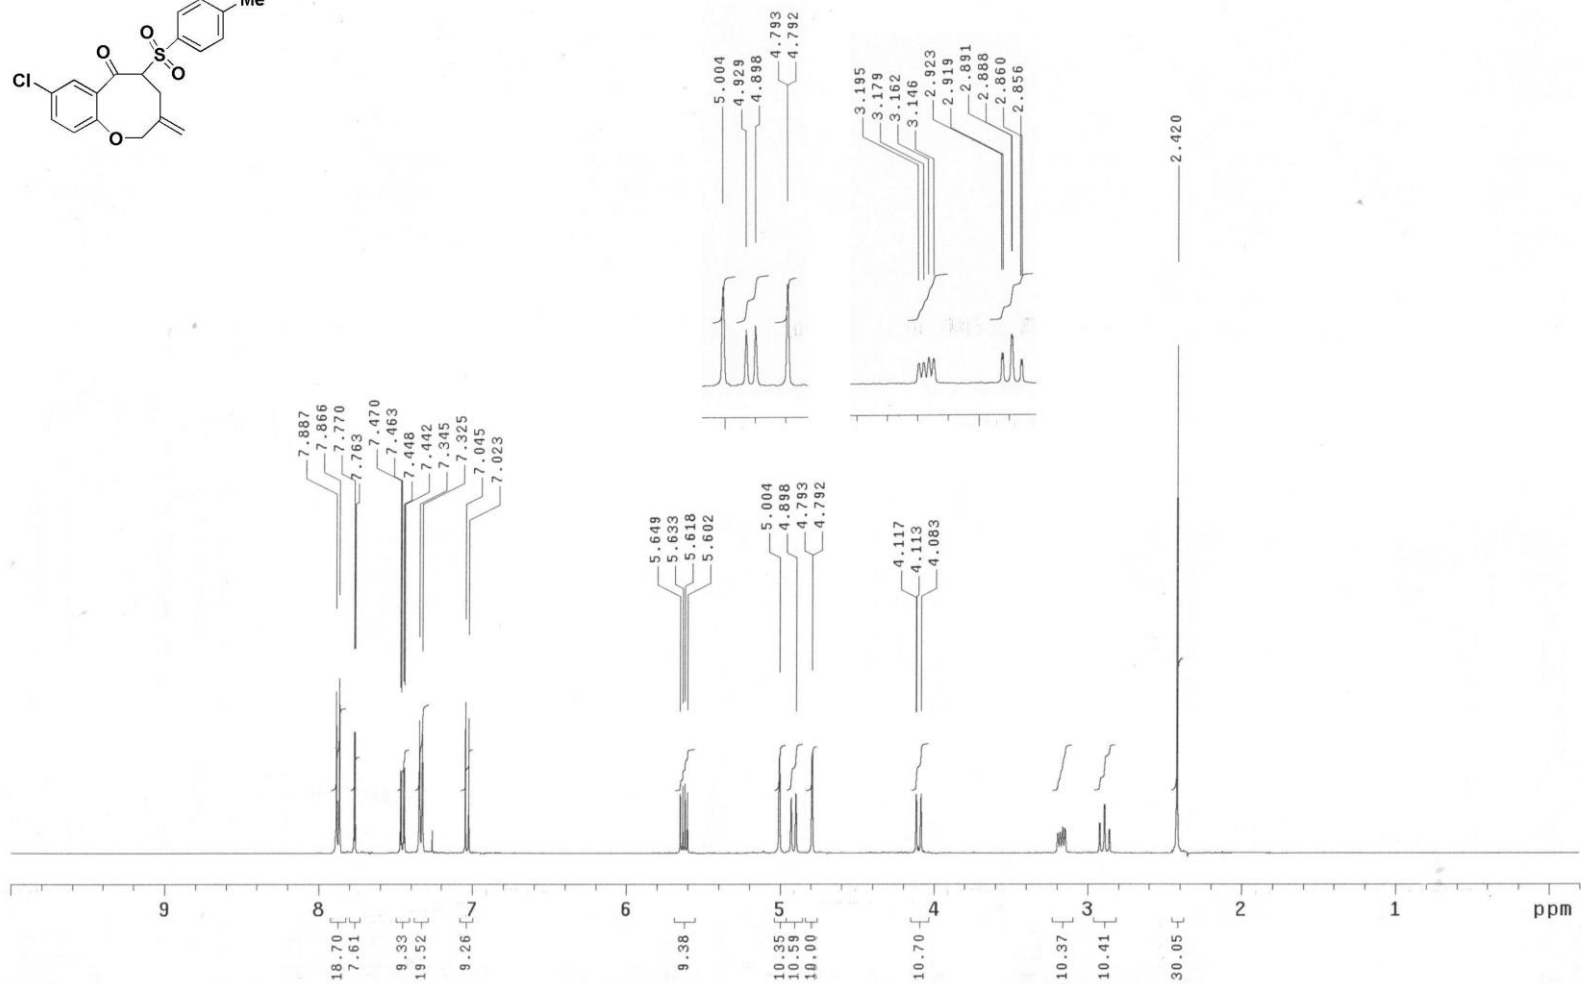

# Compound 4m (<sup>13</sup>C-NMR spectral data)

NC1090115

Pulse Sequence: s2pu1

UNITYplus-400 "unity400"

Date: Jan 16 2020

Solvent: CDCl<sub>3</sub>

Ambient temperature

Total 848 repetitions

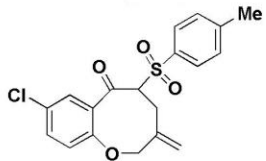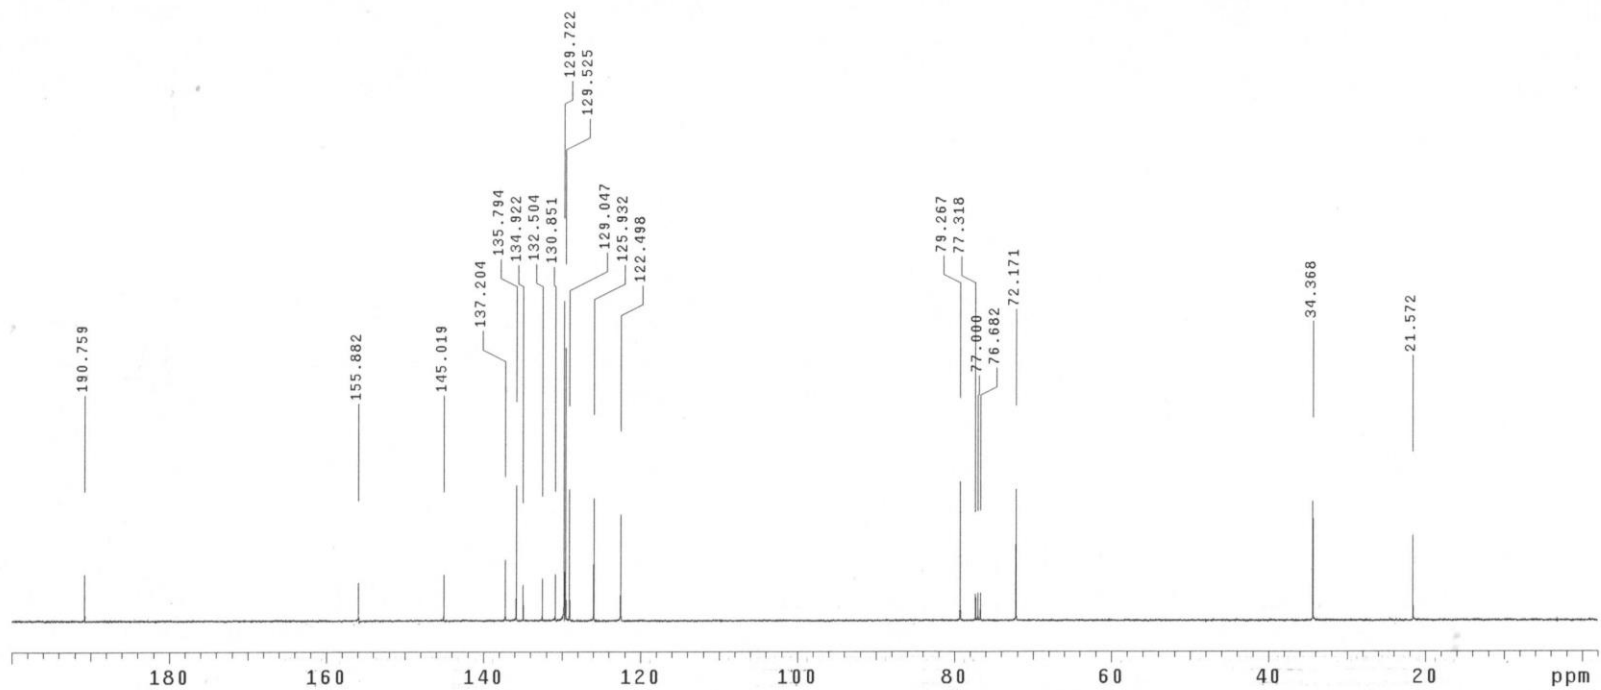

# Compound 4n (<sup>1</sup>H-NMR spectral data)

NC1090131

Pulse Sequence: s2pu1  
 UNITYplus-400 "unity400"  
 Date: Feb 3 2020  
 Solvent: CDC13  
 Ambient temperature  
 Total 32 repetitions

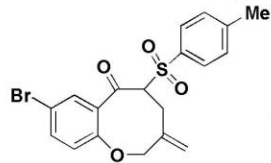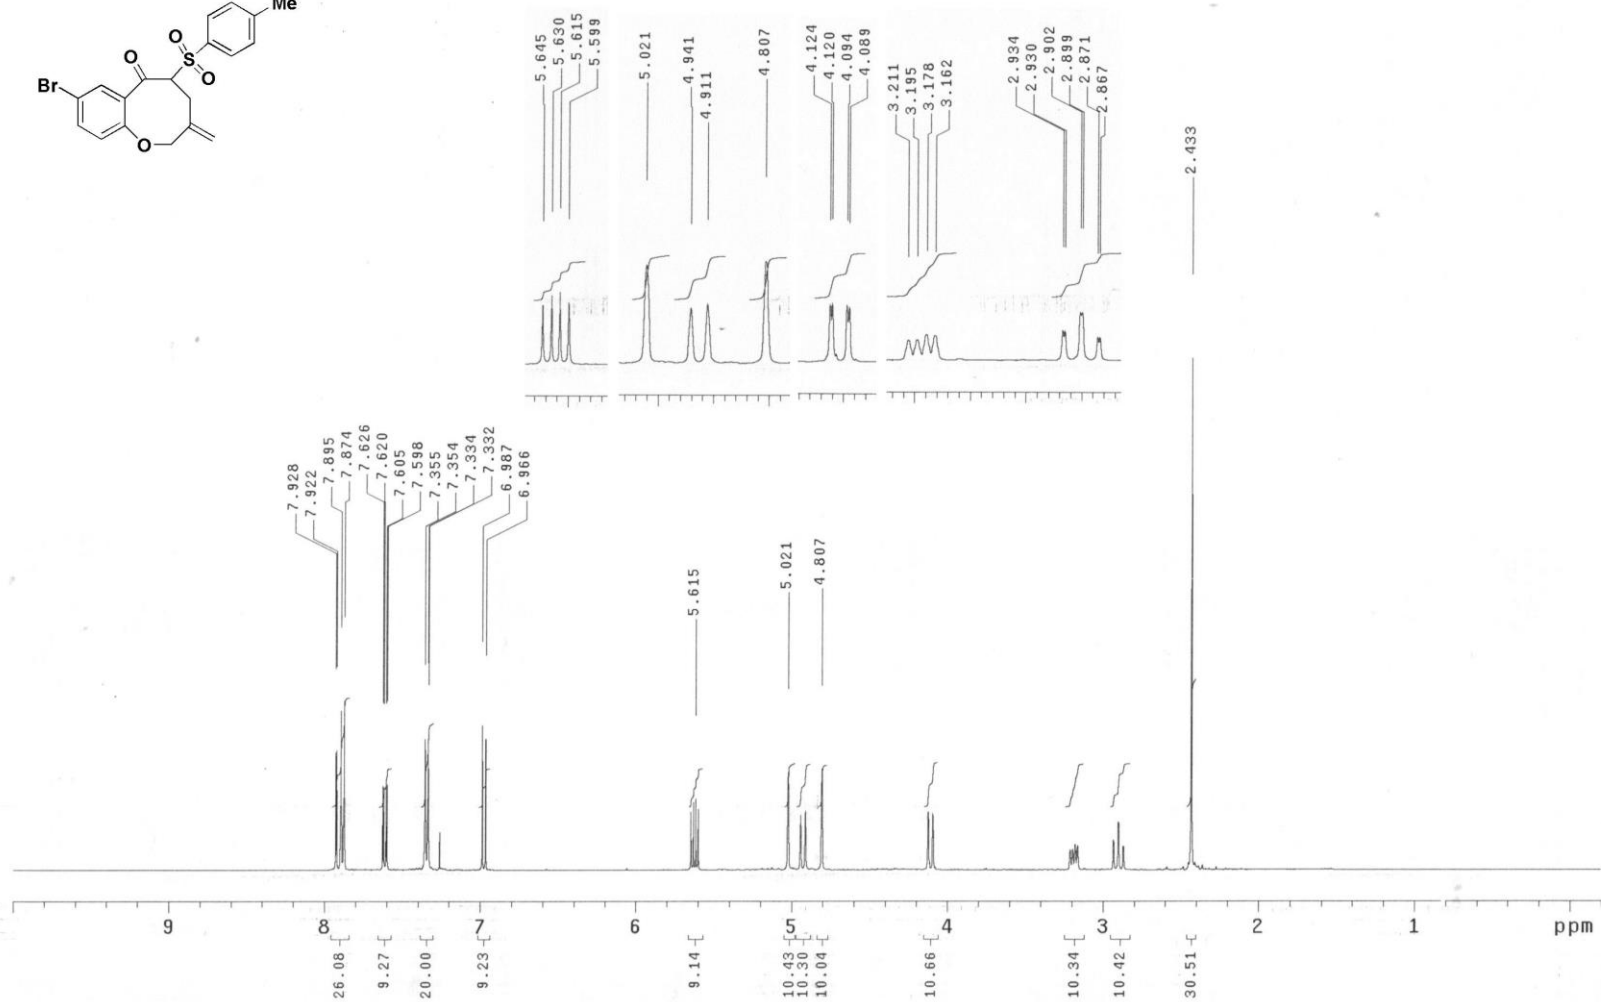

# Compound 4n (<sup>13</sup>C-NMR spectral data)

NC1090131

Pulse Sequence: s2pu1

UNITYplus-400 "unity400"

Date: Feb 3 2020

Solvent: CDCl<sub>3</sub>

Ambient temperature

Total 320 repetitions

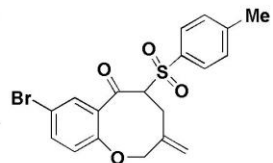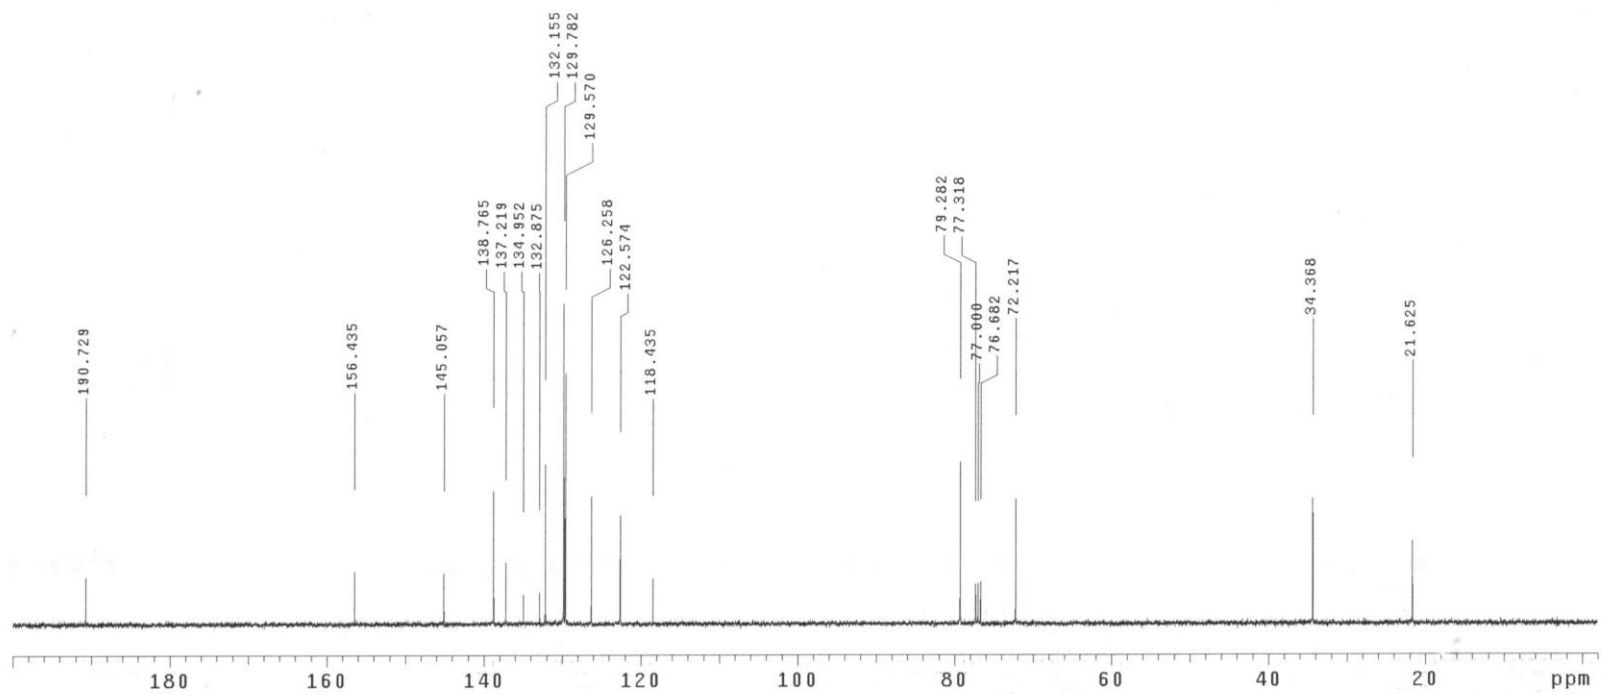

# Compound 4o (<sup>1</sup>H-NMR spectral data)

NC1081226

Pulse Sequence: s2pu1  
UNITYplus-400 "unity400"  
Date: Jan 6 2020  
Solvent: CDC13  
Ambient temperature  
Total 32 repetitions

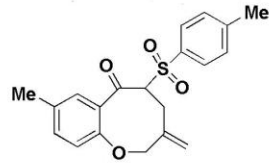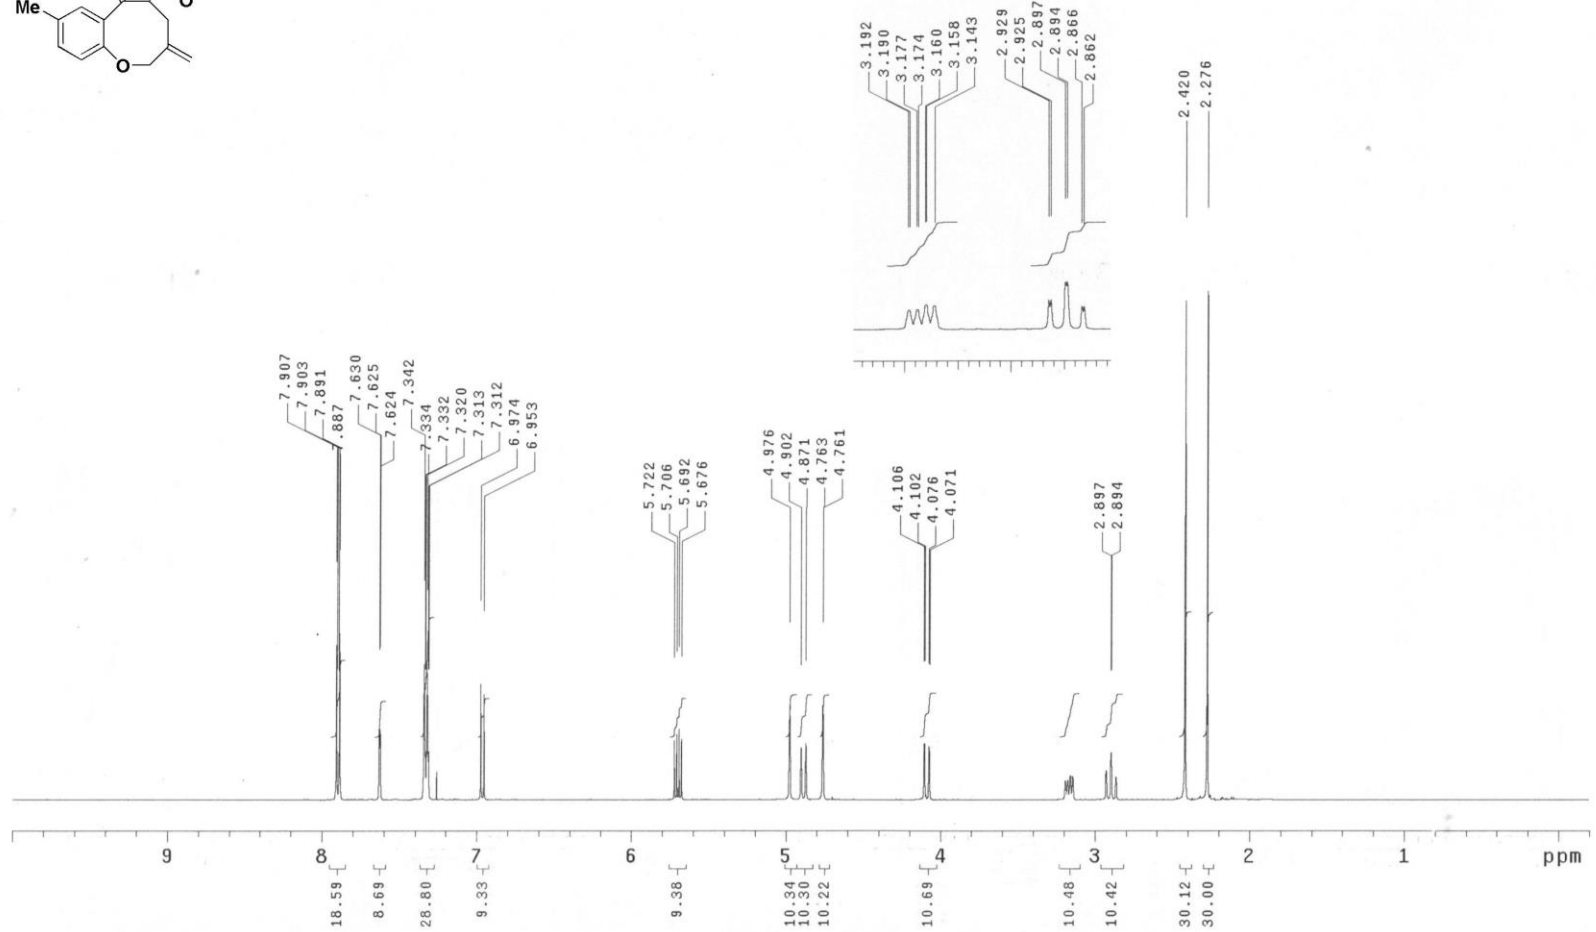

# Compound 4o (<sup>13</sup>C-NMR spectral data)

NC1081226

Pulse Sequence: s2pu1  
UNITYplus-400 "unity400"  
Date: Jan 6 2020  
Solvent: CDCl<sub>3</sub>  
Ambient temperature  
Total 704 repetitions

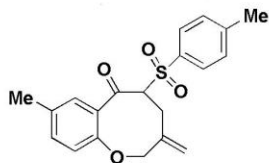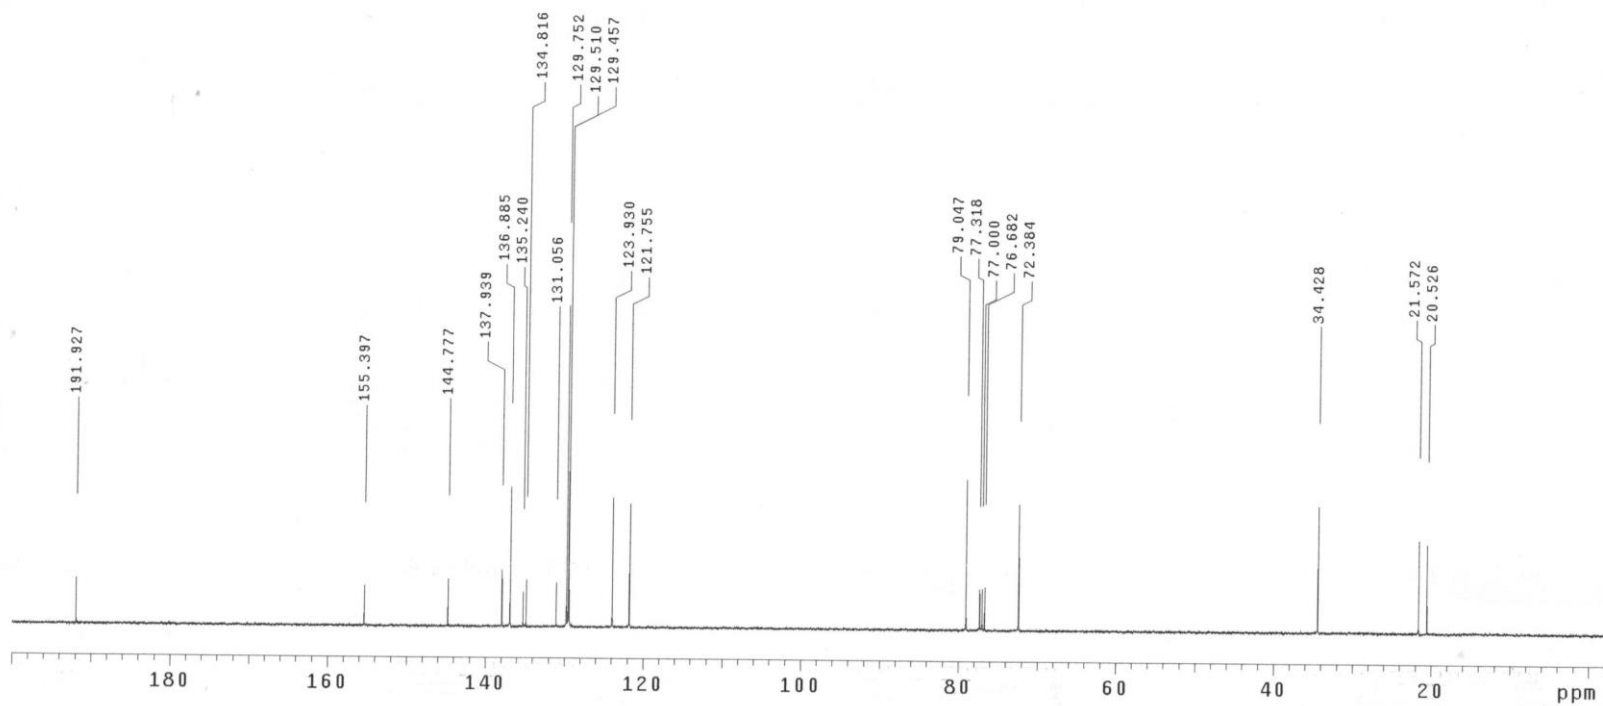

# Compound 4p (<sup>1</sup>H-NMR spectral data)

NC1090106

Pulse Sequence: s2pu1  
 UNITYplus-400 "unity400"  
 Date: Jan 6 2020  
 Solvent: CDCl<sub>3</sub>  
 Ambient temperature  
 Total 32 repetitions

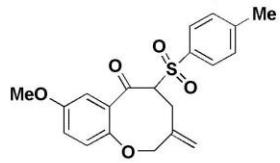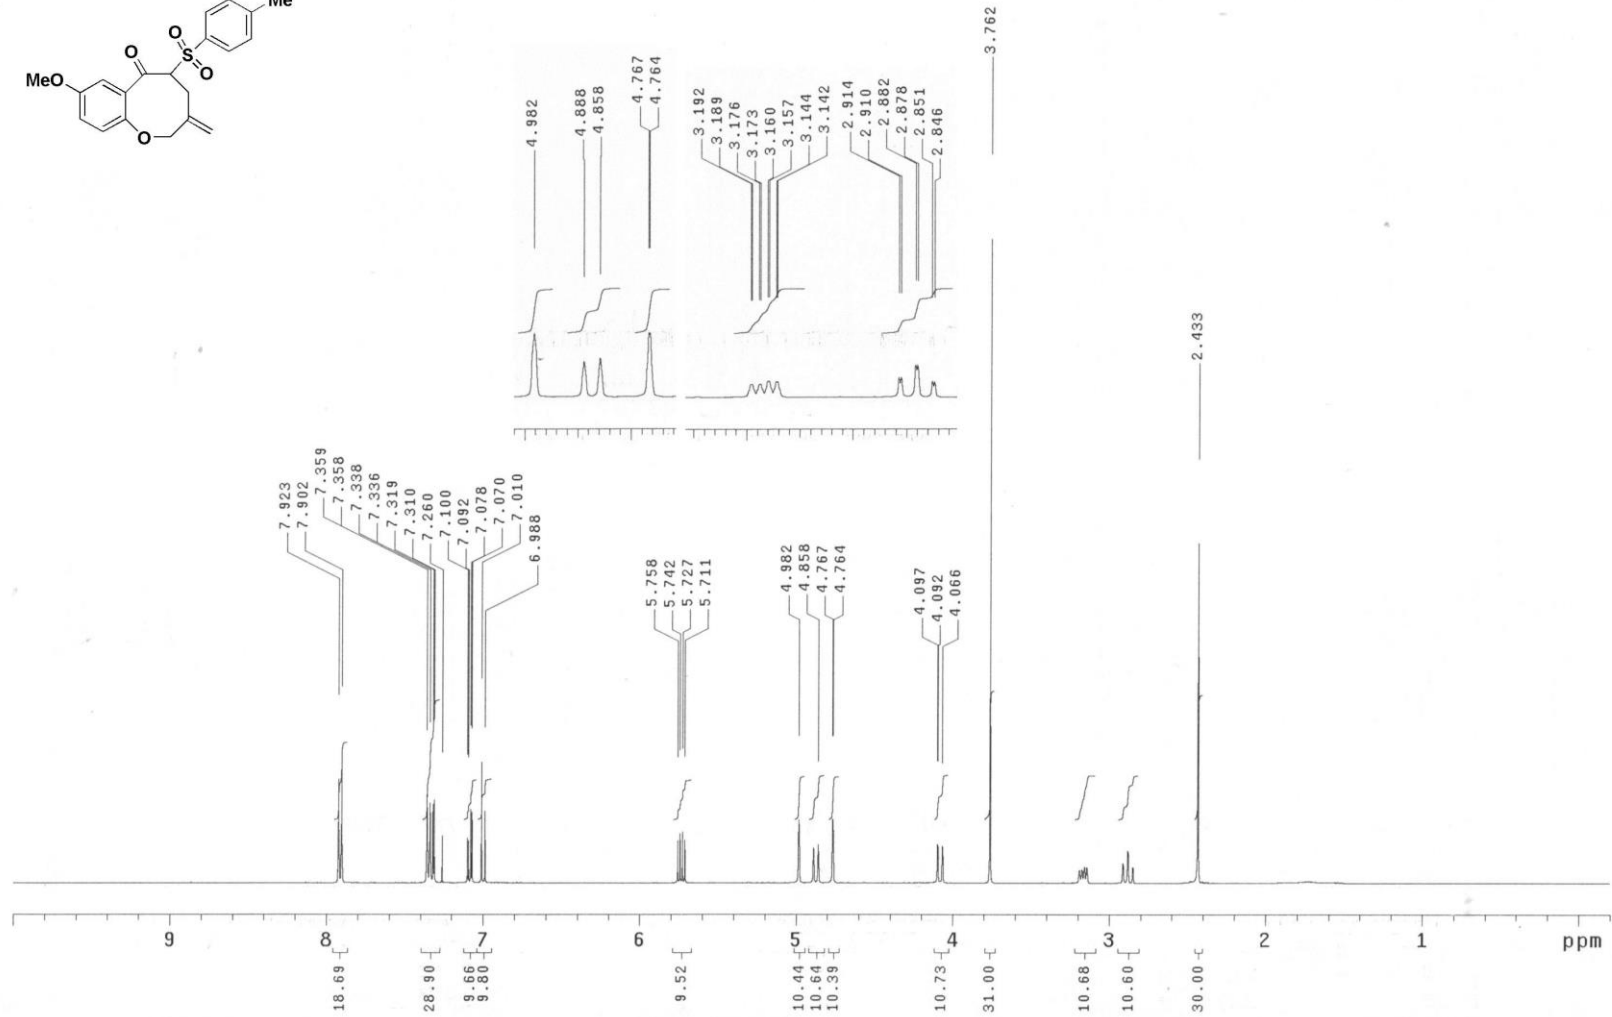



# Compound 4p (<sup>13</sup>C-NMR spectral data)

NC1090106

Pulse Sequence: s2pu1  
UNITYplus-400 "unity400"  
Date: Jan 6 2020  
Solvent: CDCl<sub>3</sub>  
Ambient temperature  
Total 512 repetitions

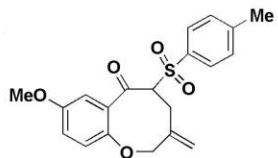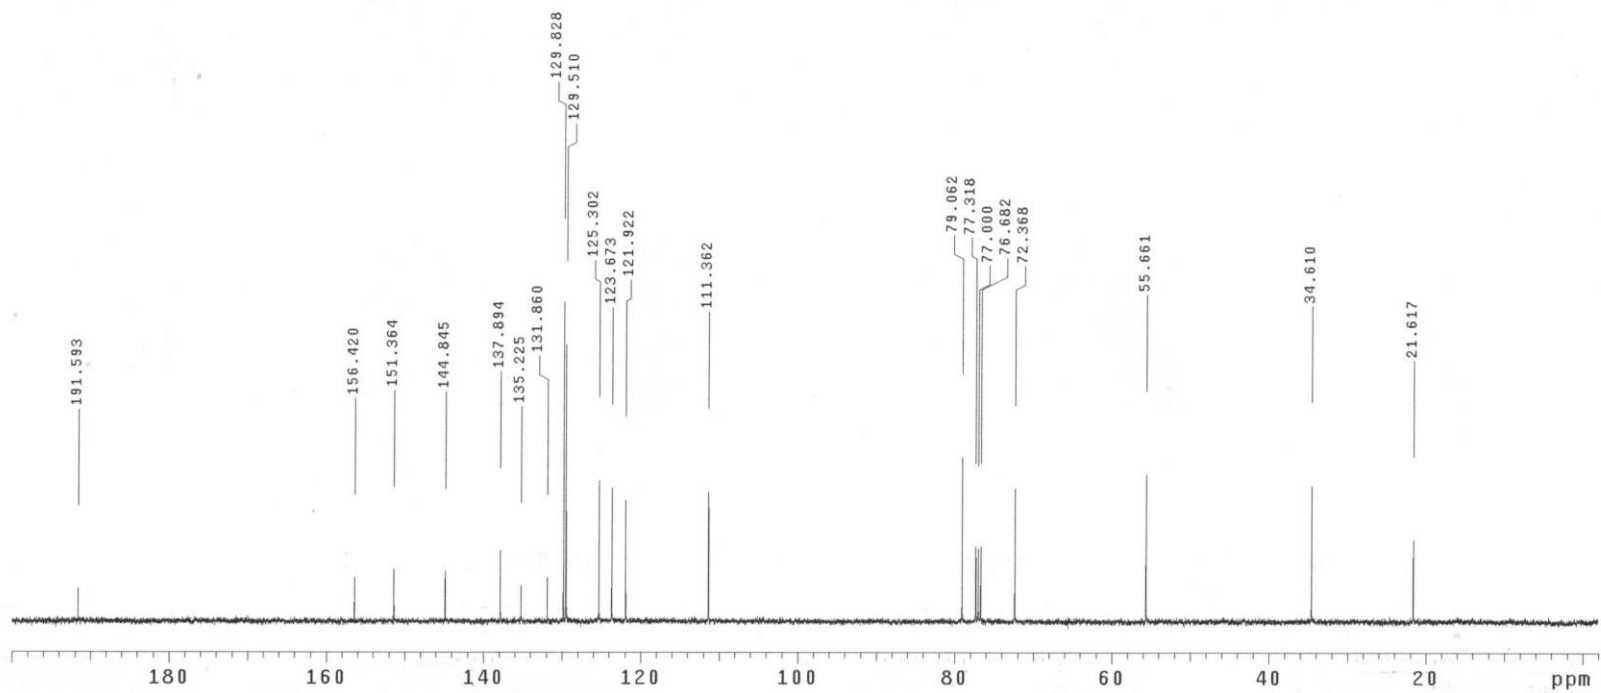

# Compound 4q (<sup>1</sup>H-NMR spectral data)

NC1081230

Pulse Sequence: s2pu1  
UNITYplus-400 "unity400"  
Date: Dec 30 2019  
Solvent: CDCl3  
Ambient temperature  
Total 32 repetitions

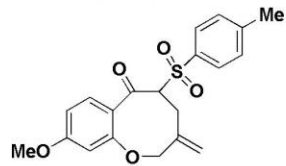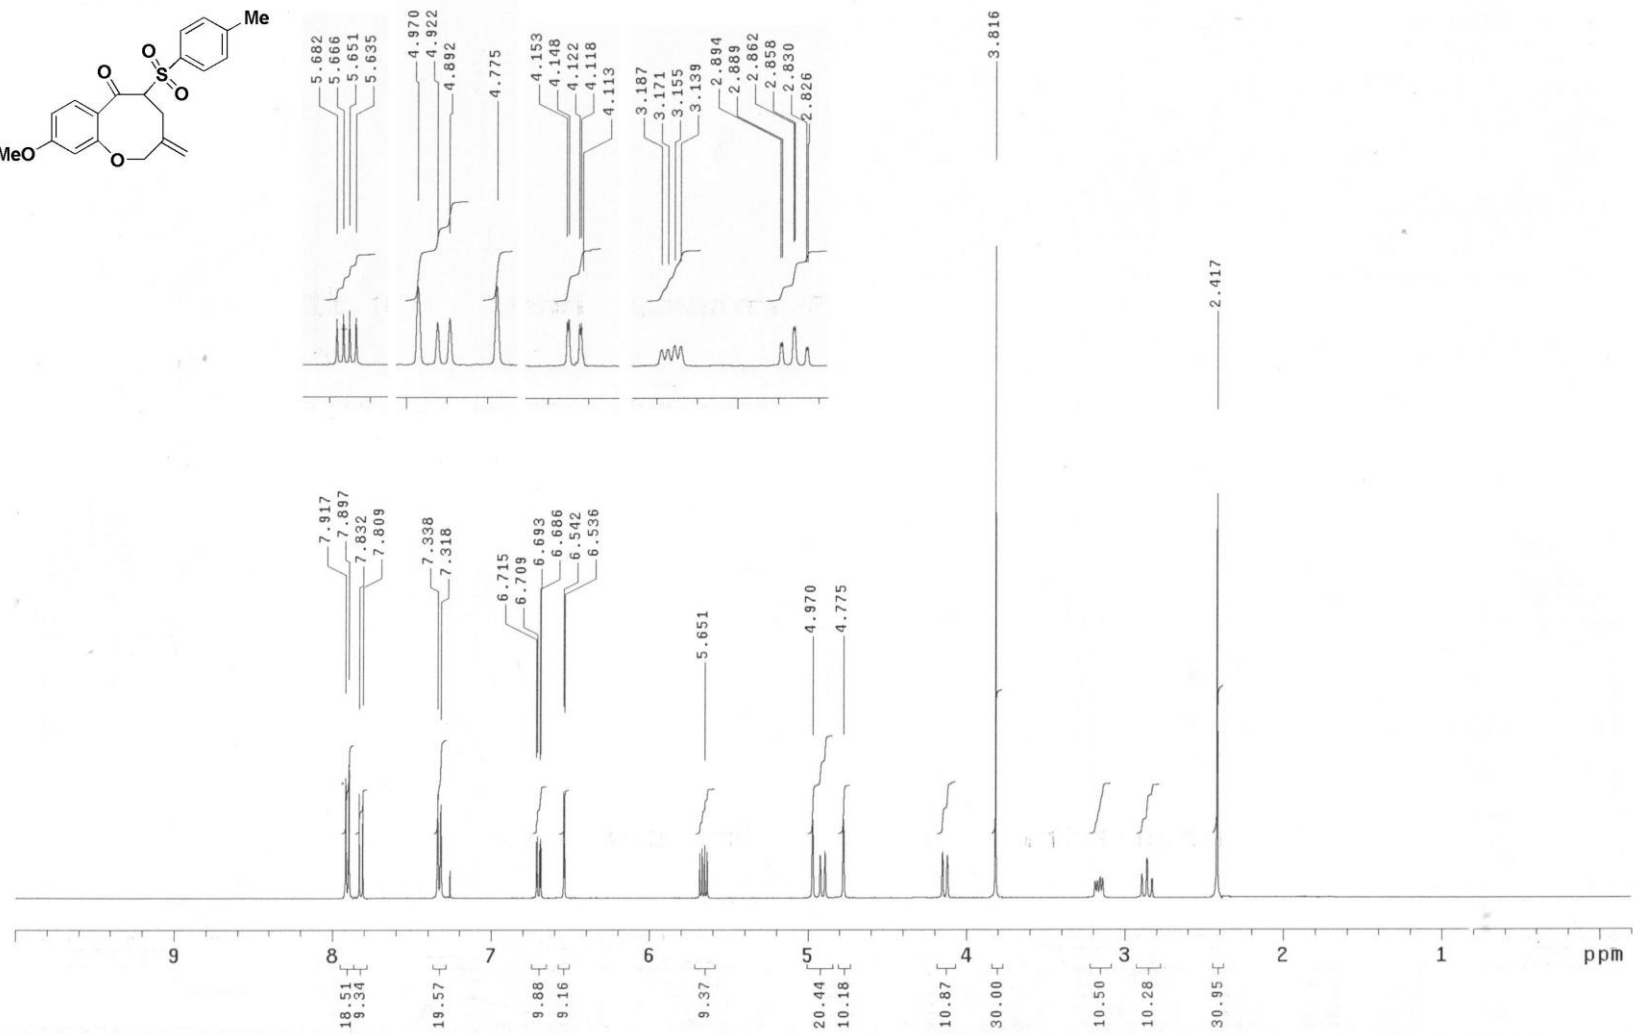

# Compound 4q (<sup>13</sup>C-NMR spectral data)

NC1081230

Pulse Sequence: s2pu1  
UNITYplus-400 "unity400"  
Date: Dec 30 2019  
Solvent: CDC13  
Ambient temperature  
Total 816 repetitions

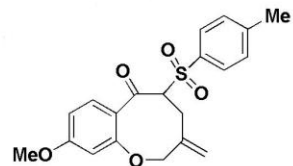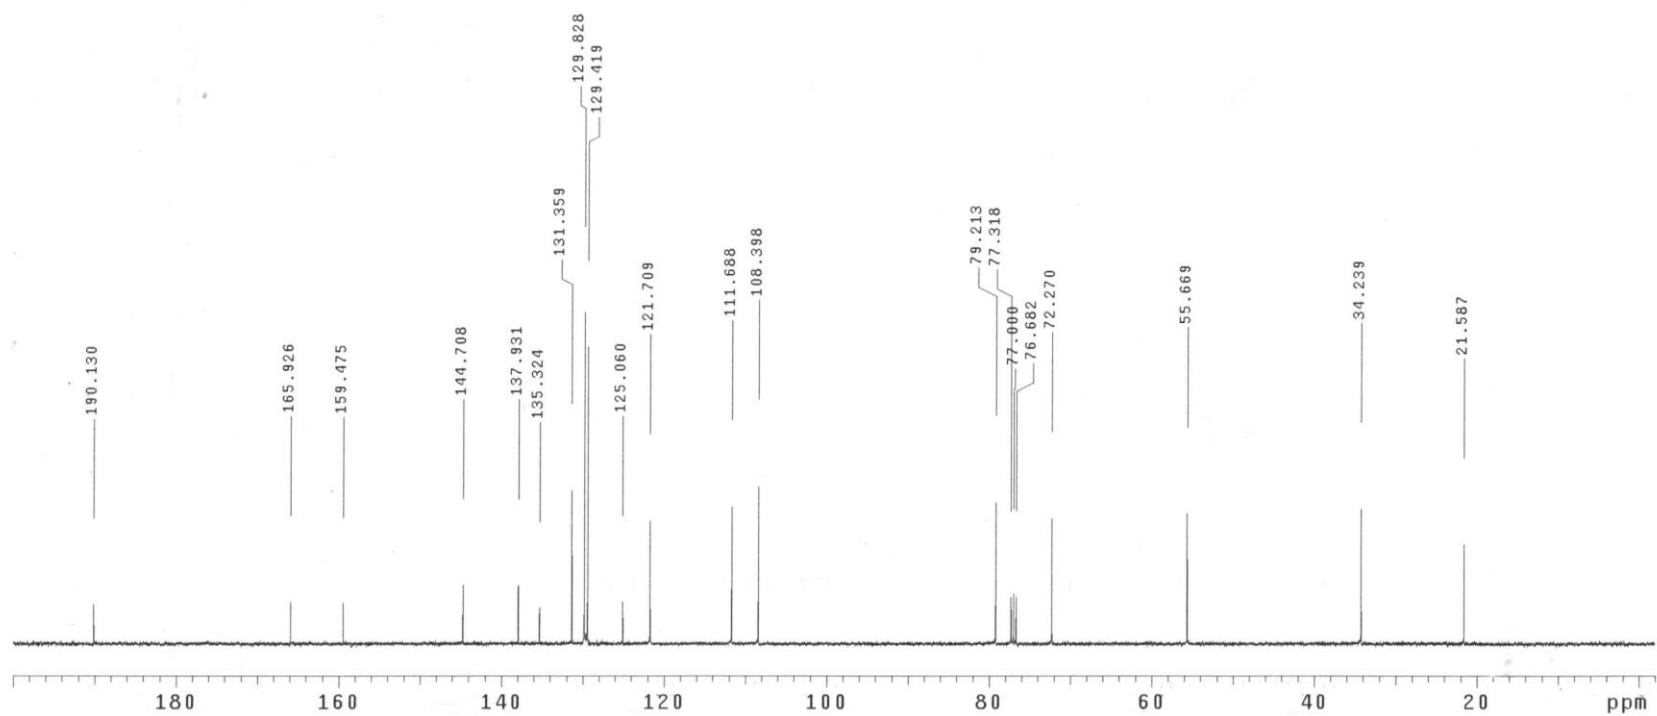

# Compound 4r (<sup>1</sup>H-NMR spectral data)

NC1090114

Pulse Sequence: s2pu1  
 UNITYplus-400 "unity400"  
 Date: Jan 15 2020  
 Solvent: CDC13  
 Ambient temperature  
 Total 64 repetitions

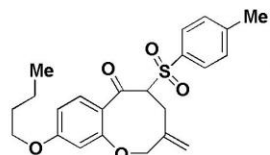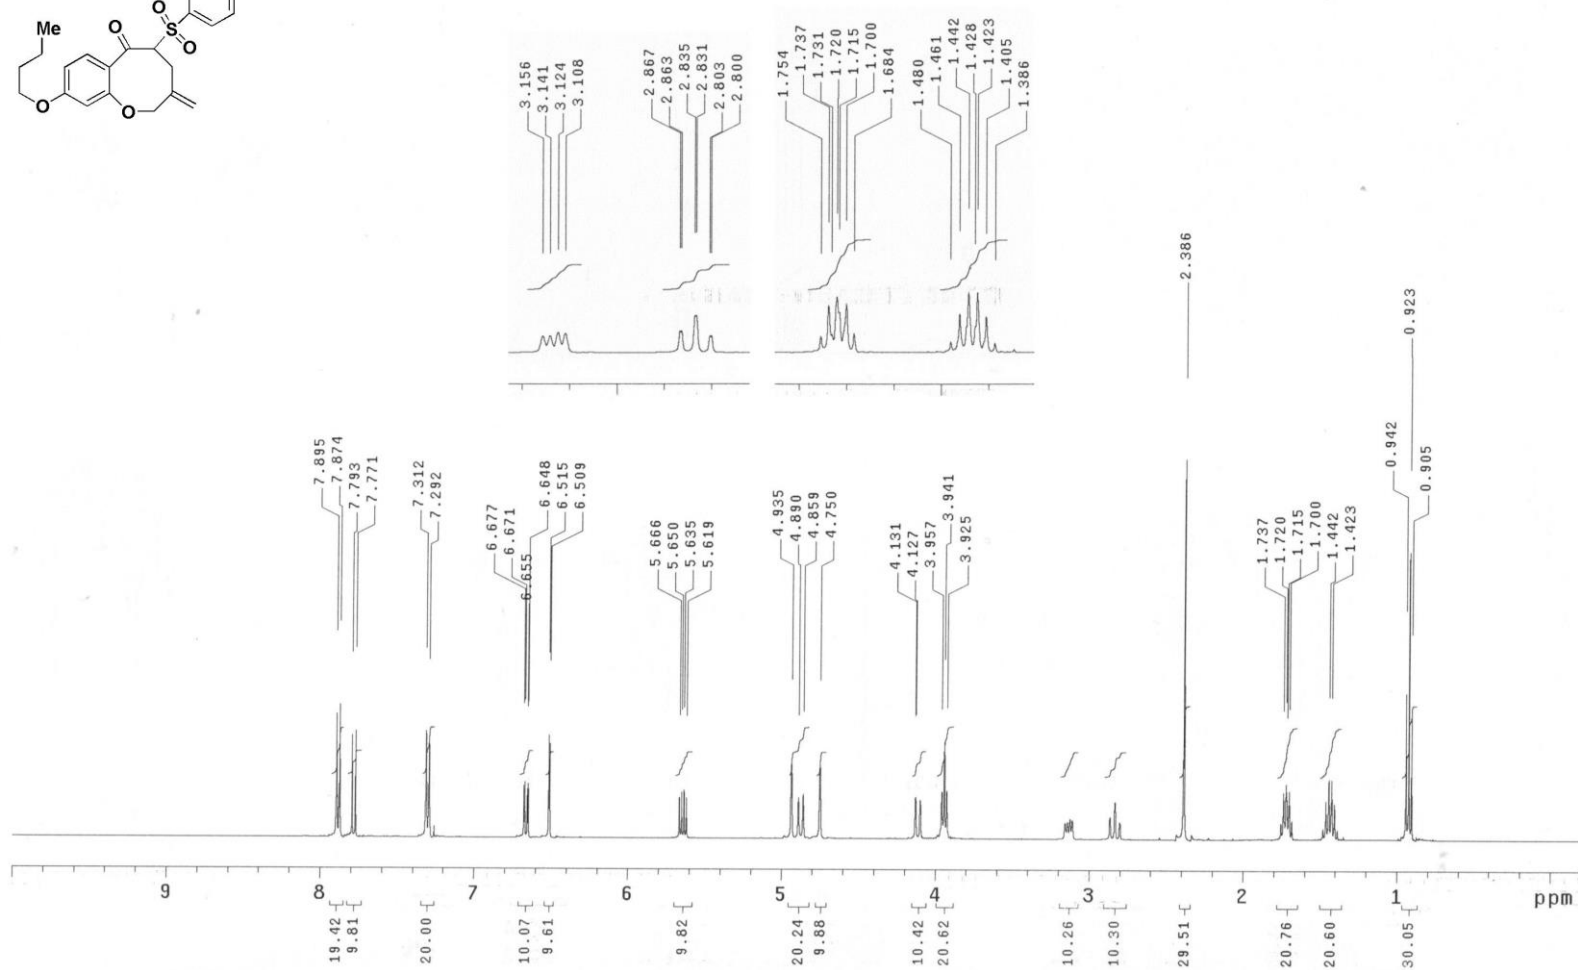

# Compound 4r (<sup>13</sup>C-NMR spectral data)

NC1090114

Pulse Sequence: s2pu1  
UNITYplus-400 "unity400"  
Date: Jan 15 2020  
Solvent: CDCl<sub>3</sub>  
Ambient temperature  
Total 320 repetitions

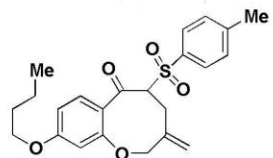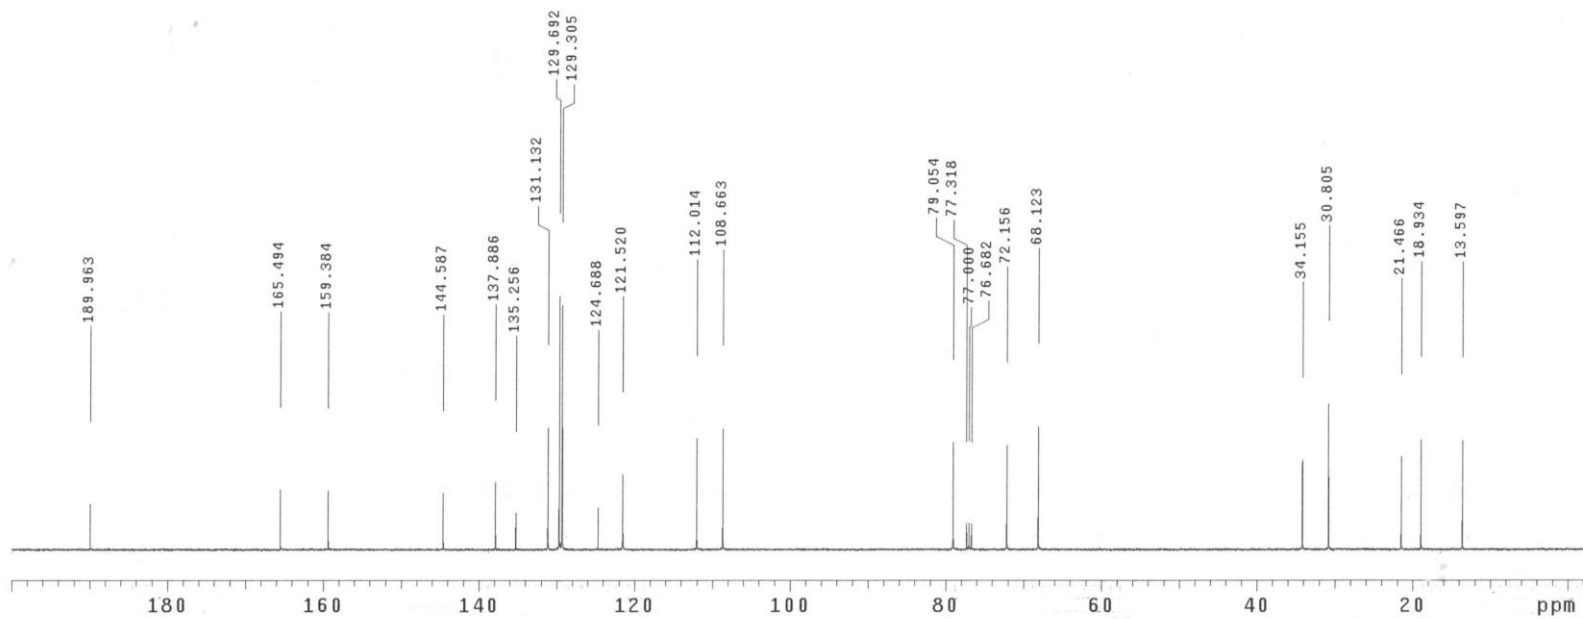

# Compound 4s (<sup>1</sup>H-NMR spectral data)

NC1090130

Pulse Sequence: s2pu1  
 UNITYplus-400 "unity400"  
 Date: Feb 3 2020  
 Solvent: CDC13  
 Ambient temperature  
 Total 32 repetitions

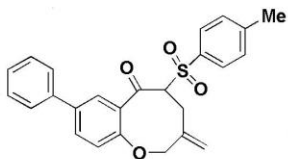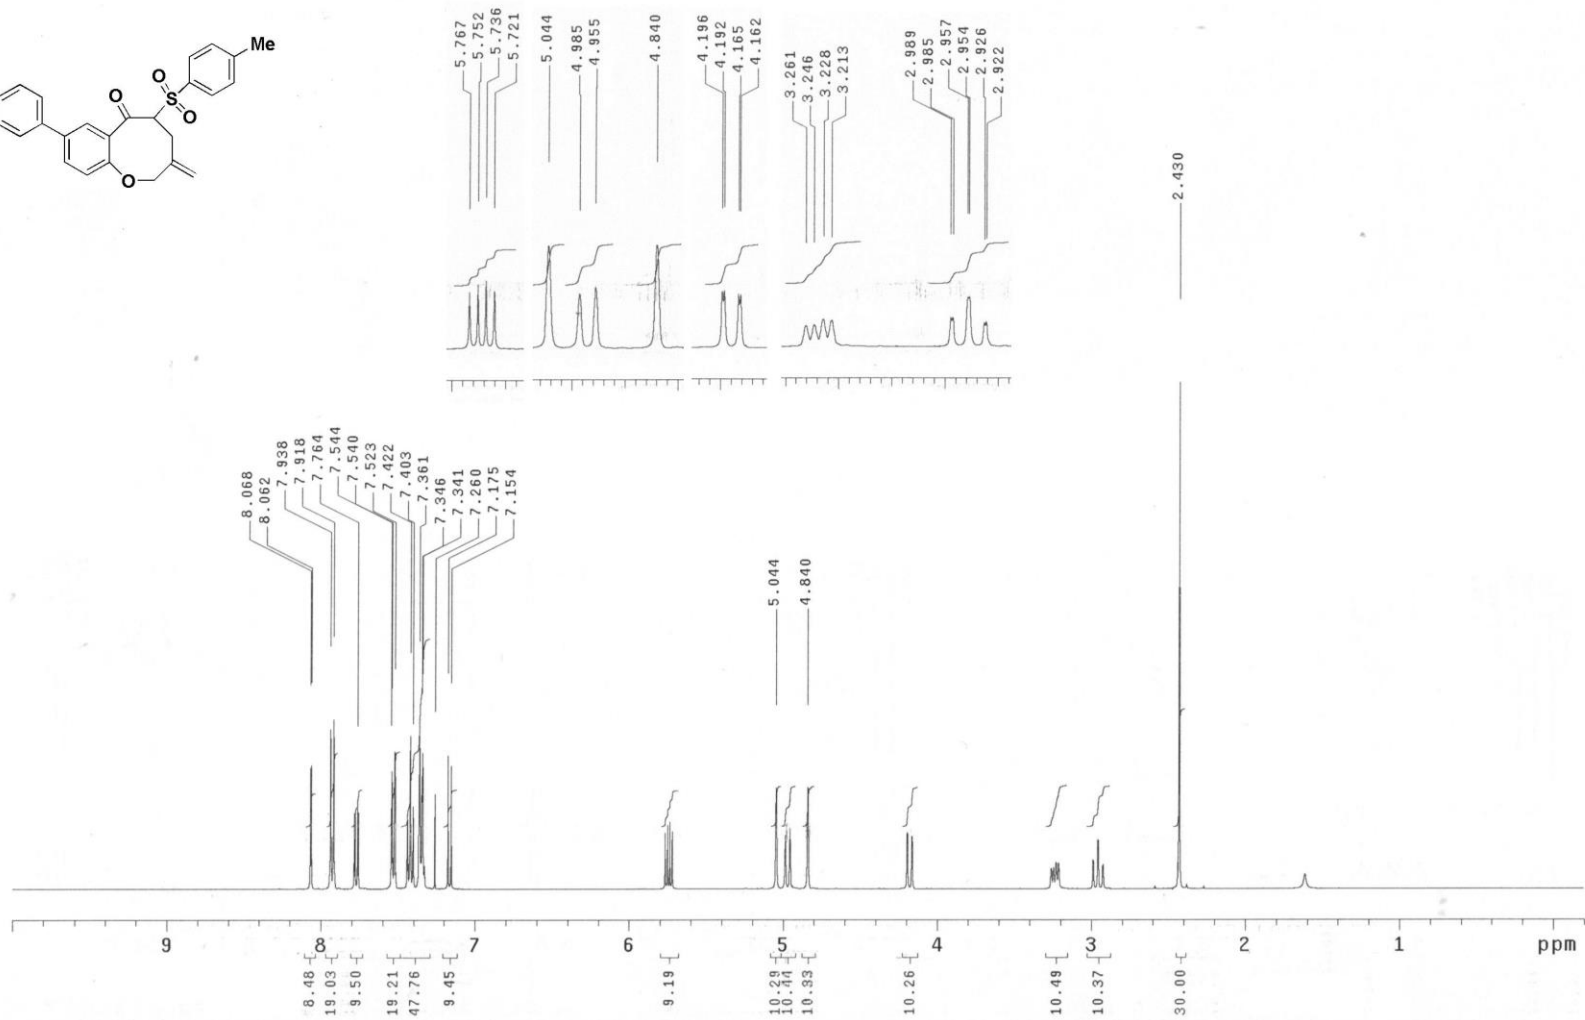

# Compound 4s (<sup>13</sup>C-NMR spectral data)

NC1090130

Pulse Sequence: s2pu1

UNITYplus-400 "unity400"

Date: Feb 3 2020

Solvent: CDCl<sub>3</sub>

Ambient temperature

Total 1312 repetitions

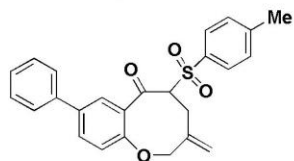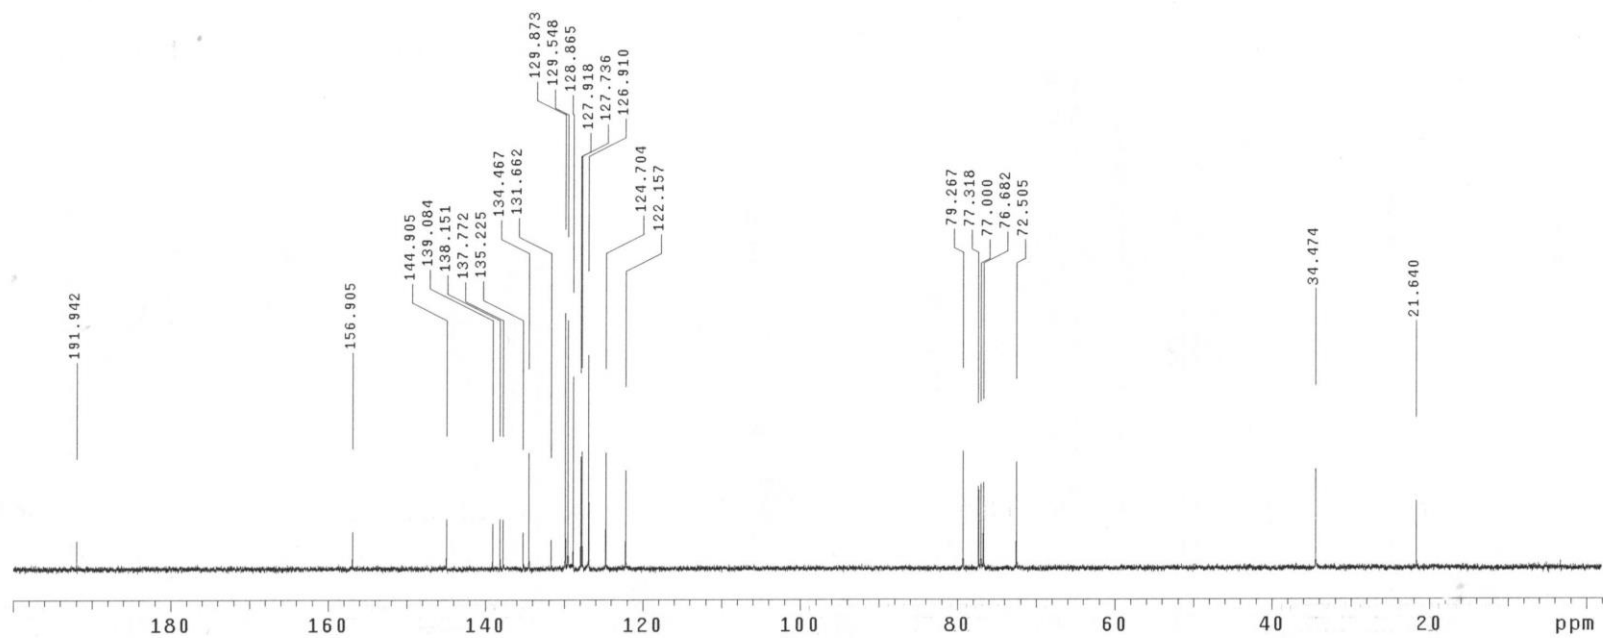

# Compound 4t (<sup>1</sup>H-NMR spectral data)

NC1081224

Pulse Sequence: s2pu1  
 UNITYplus-400 "unity400"  
 Date: Dec 24 2019  
 Solvent: CDC13  
 Ambient temperature  
 Total 32 repetitions

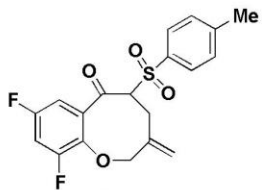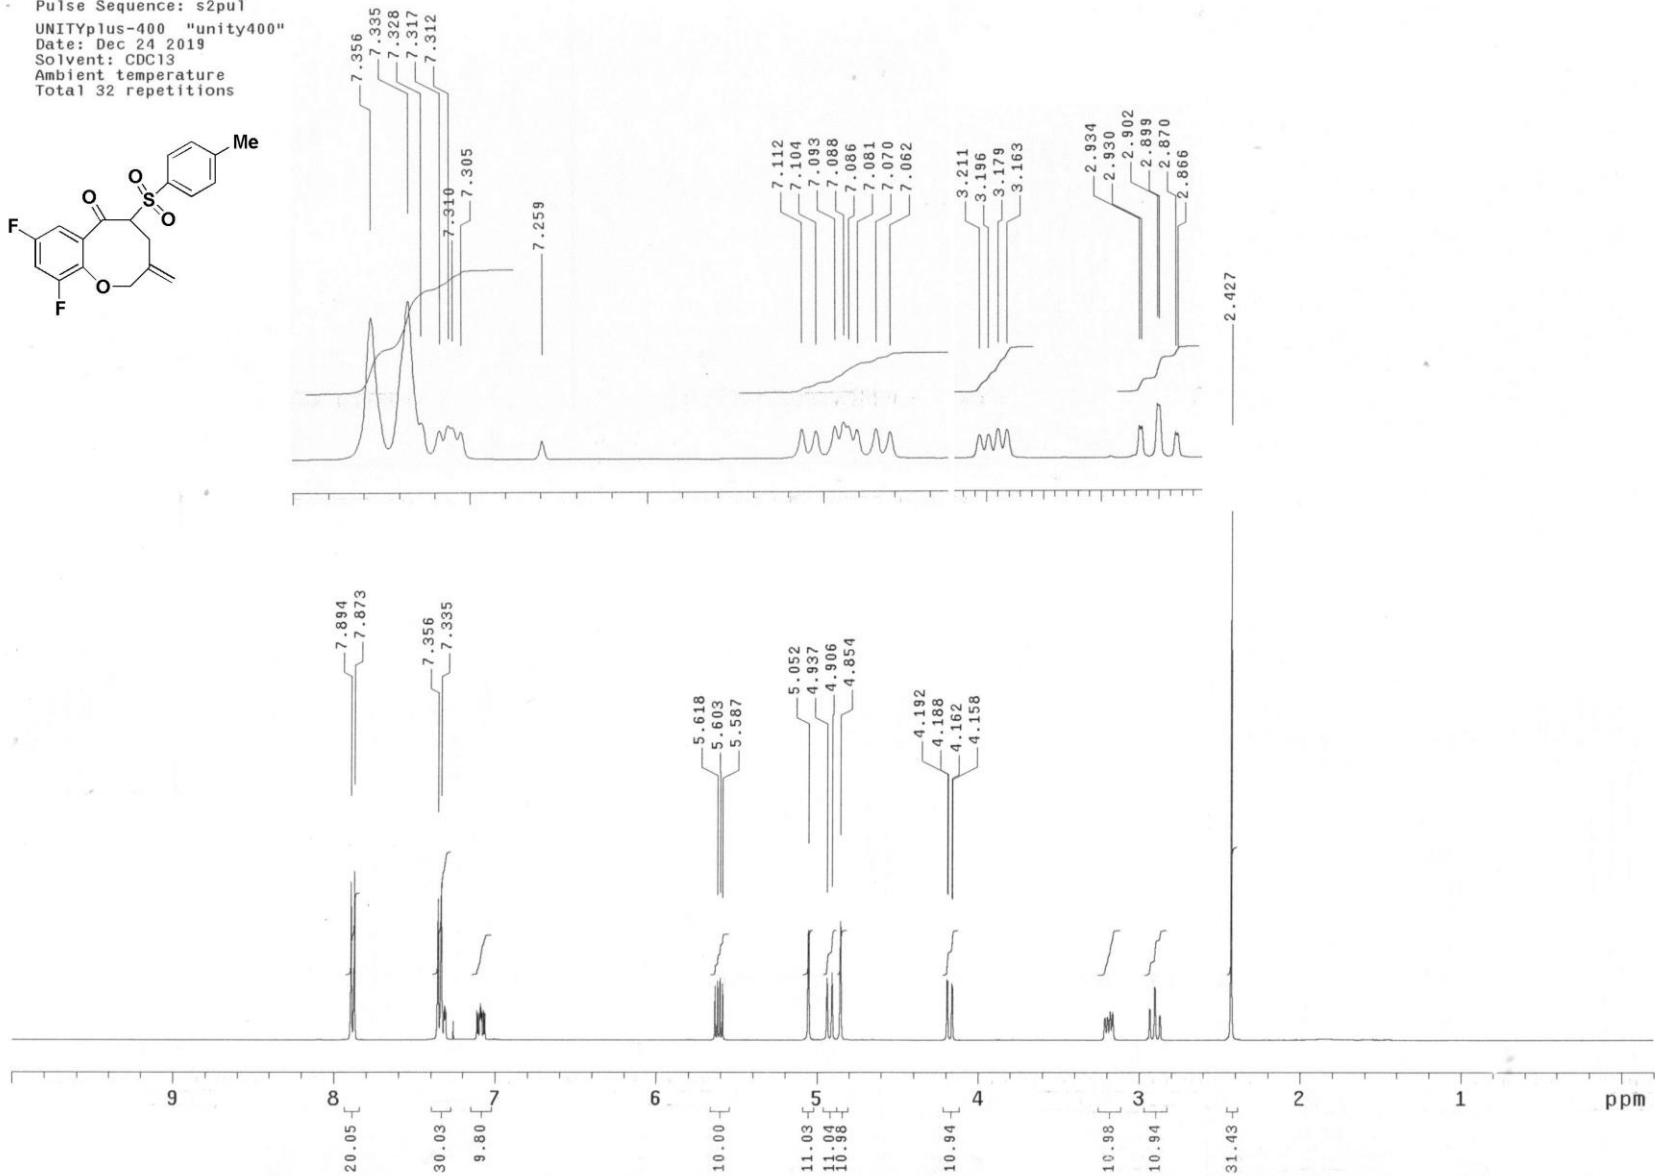



# Compound 4t (<sup>13</sup>C-NMR spectral data)

NC1081224

Pulse Sequence: s2pu1  
UNITYplus-400 "unity400"  
Date: Dec 24 2019  
Solvent: CDCl<sub>3</sub>  
Ambient temperature  
Total 752 repetitions

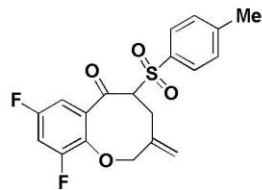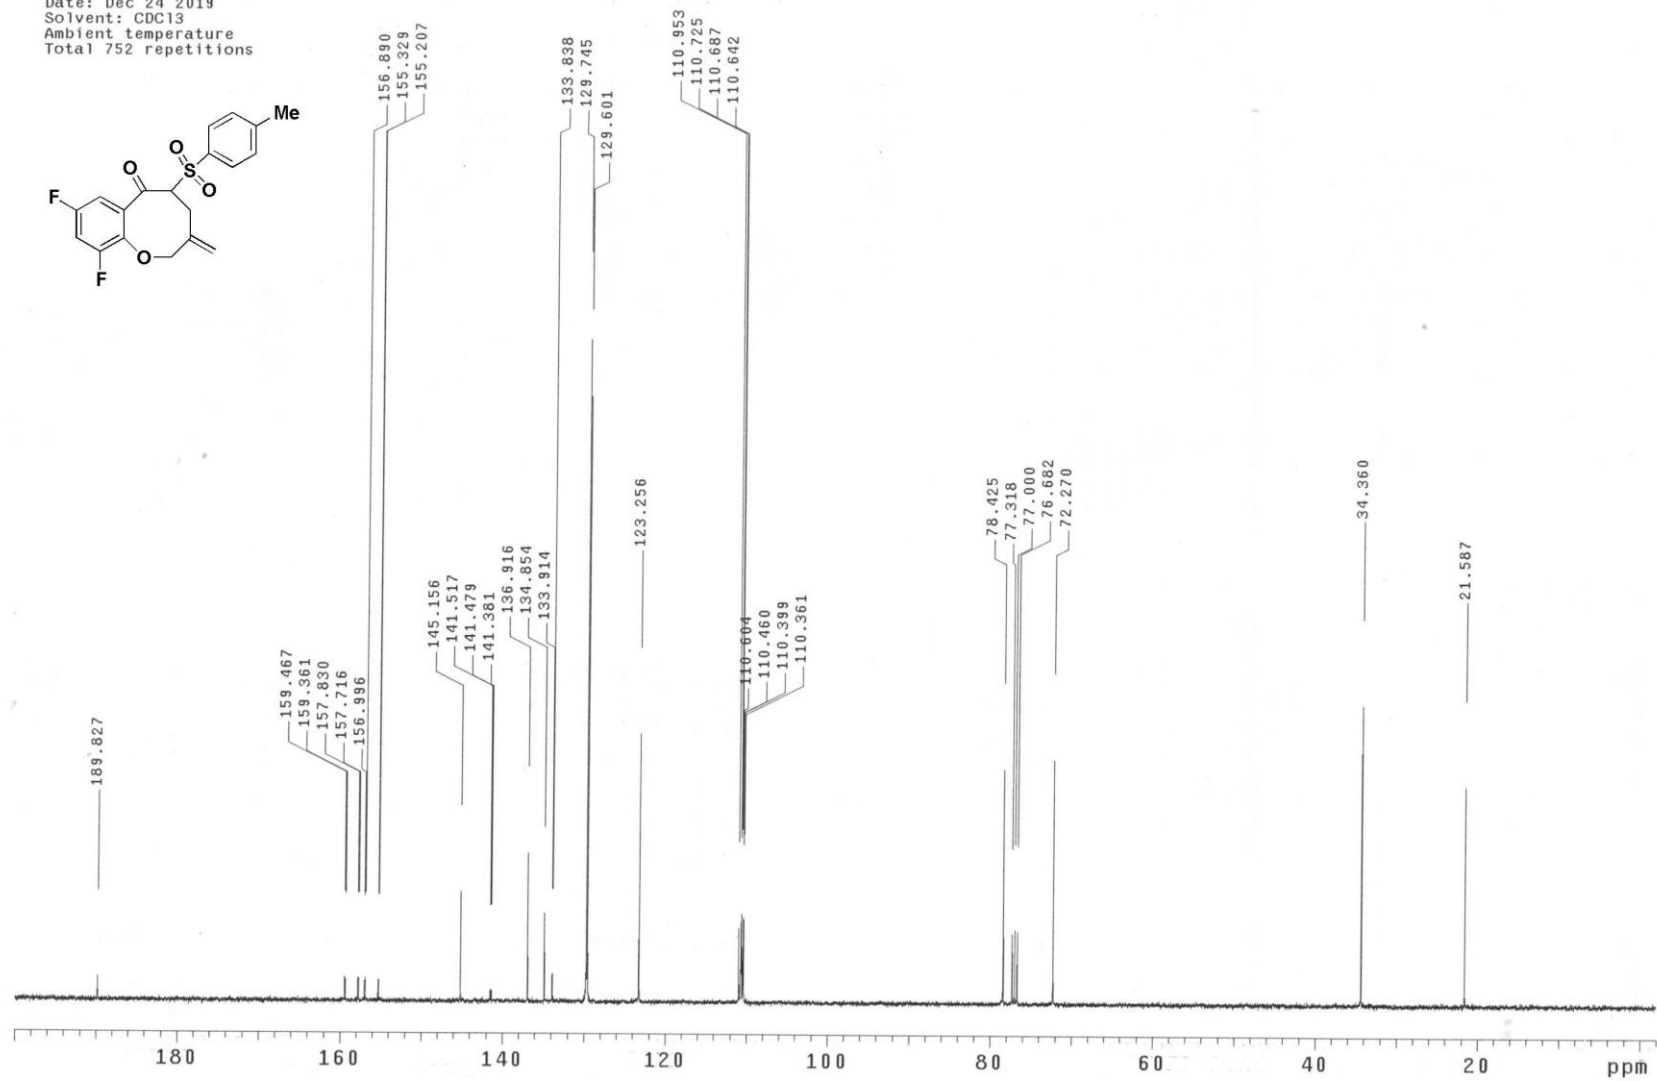

# Compound 4u (<sup>1</sup>H-NMR spectral data)

NC1090102

Pulse Sequence: s2pu1  
UNITYplus-400 "unity400"  
Date: Jan 3 2020  
Solvent: CDCl<sub>3</sub>  
Ambient temperature  
Total 64 repetitions

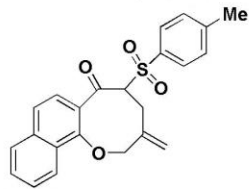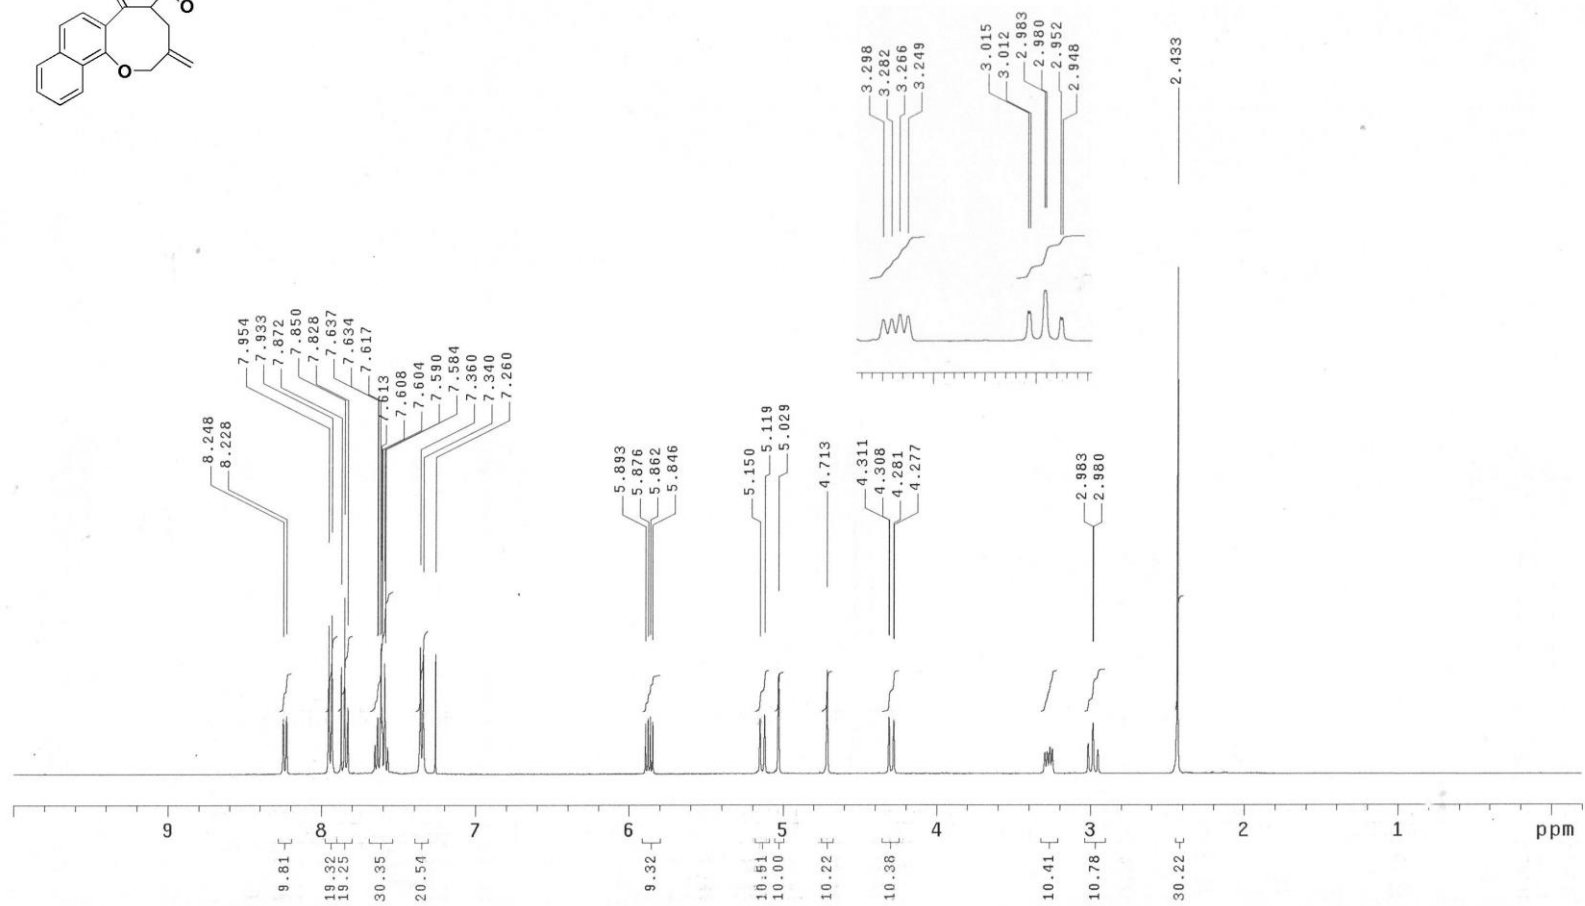

# Compound 4u (<sup>13</sup>C-NMR spectral data)

NC1090102

Pulse Sequence: s2pu1  
UNITYplus-400 "unity400"  
Date: Jan 3 2020  
Solvent: CDCl<sub>3</sub>  
Ambient temperature  
Total 3584 repetitions

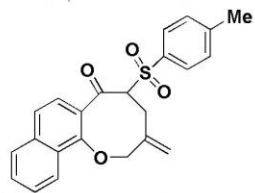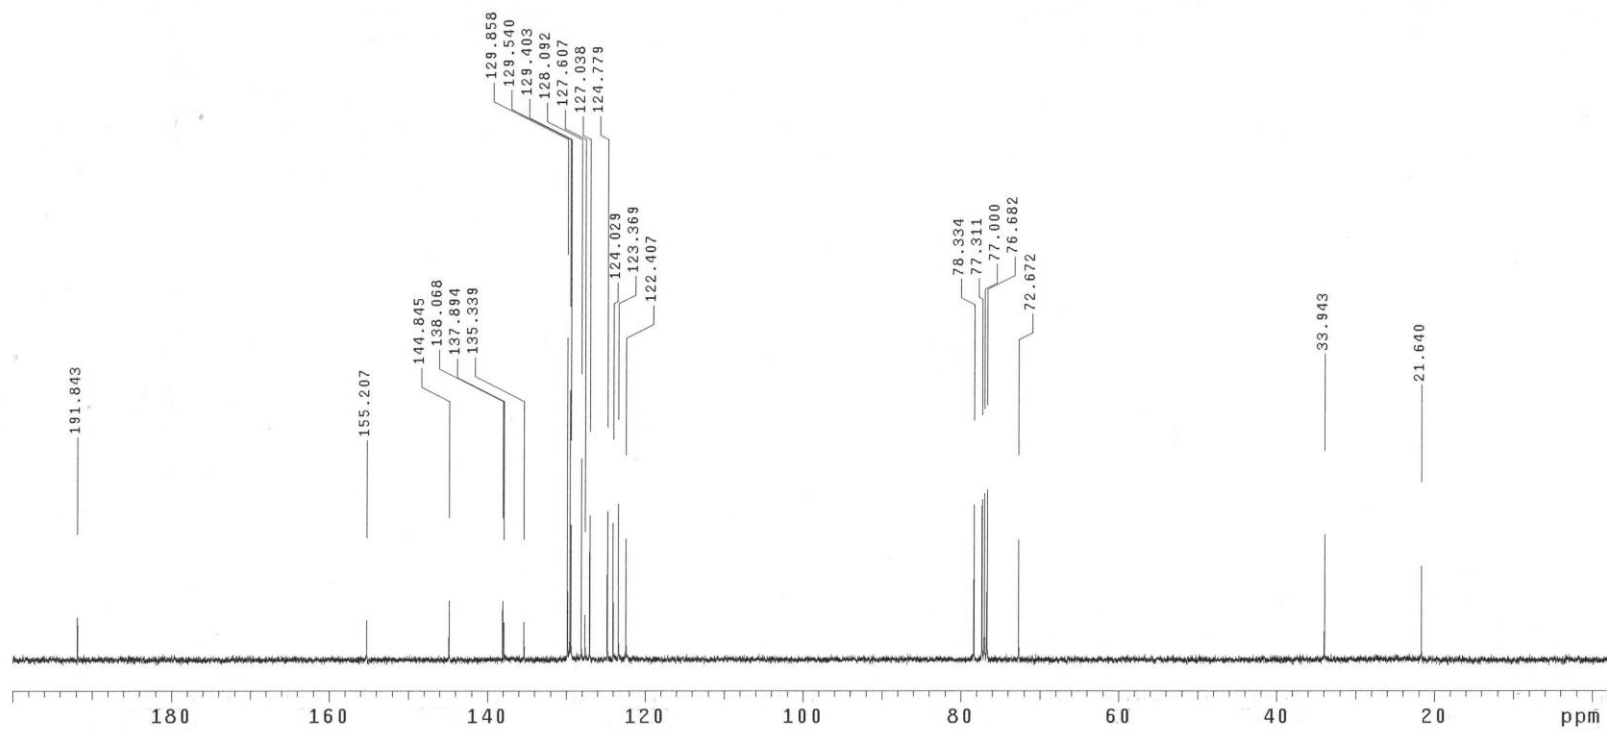

# Compound 4v (<sup>1</sup>H-NMR spectral data)

NC1090204

Pulse Sequence: s2pu1  
UNITYplus-400 "unity400"  
Date: Feb 5 2020  
Solvent: CDCl3  
Ambient temperature  
Total 32 repetitions

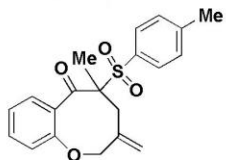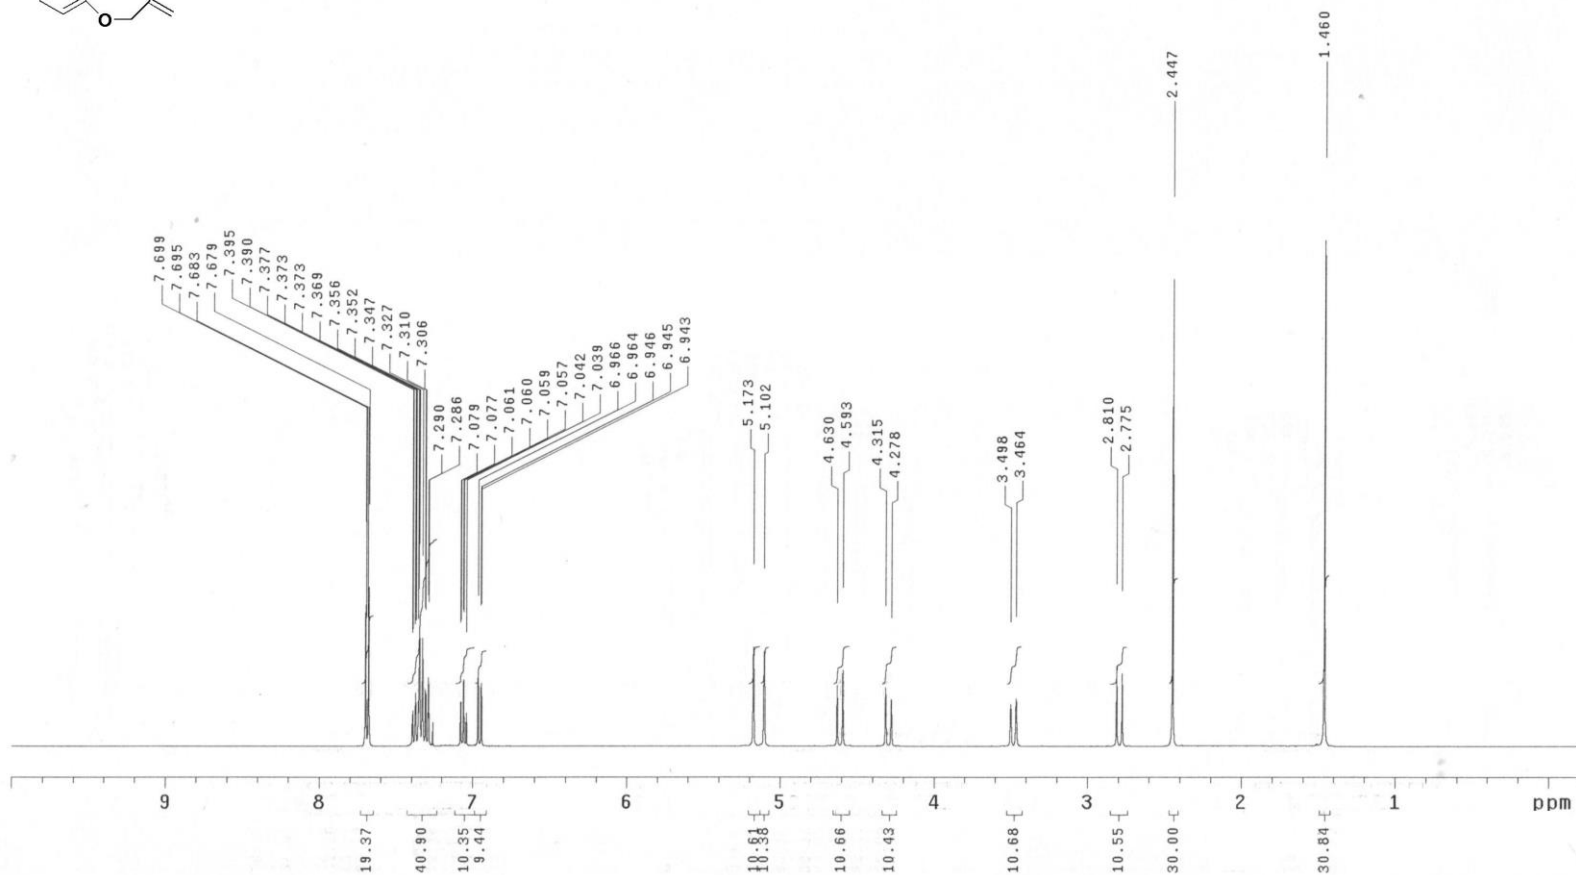

# Compound 4v (<sup>13</sup>C-NMR spectral data)

NC1090204

Pulse Sequence: s2pu1  
UNITYplus-400 "unity400"  
Date: Feb 5 2020  
Solvent: CDCl<sub>3</sub>  
Ambient temperature  
Total 224 repetitions

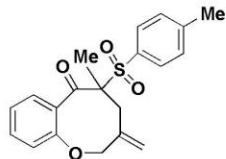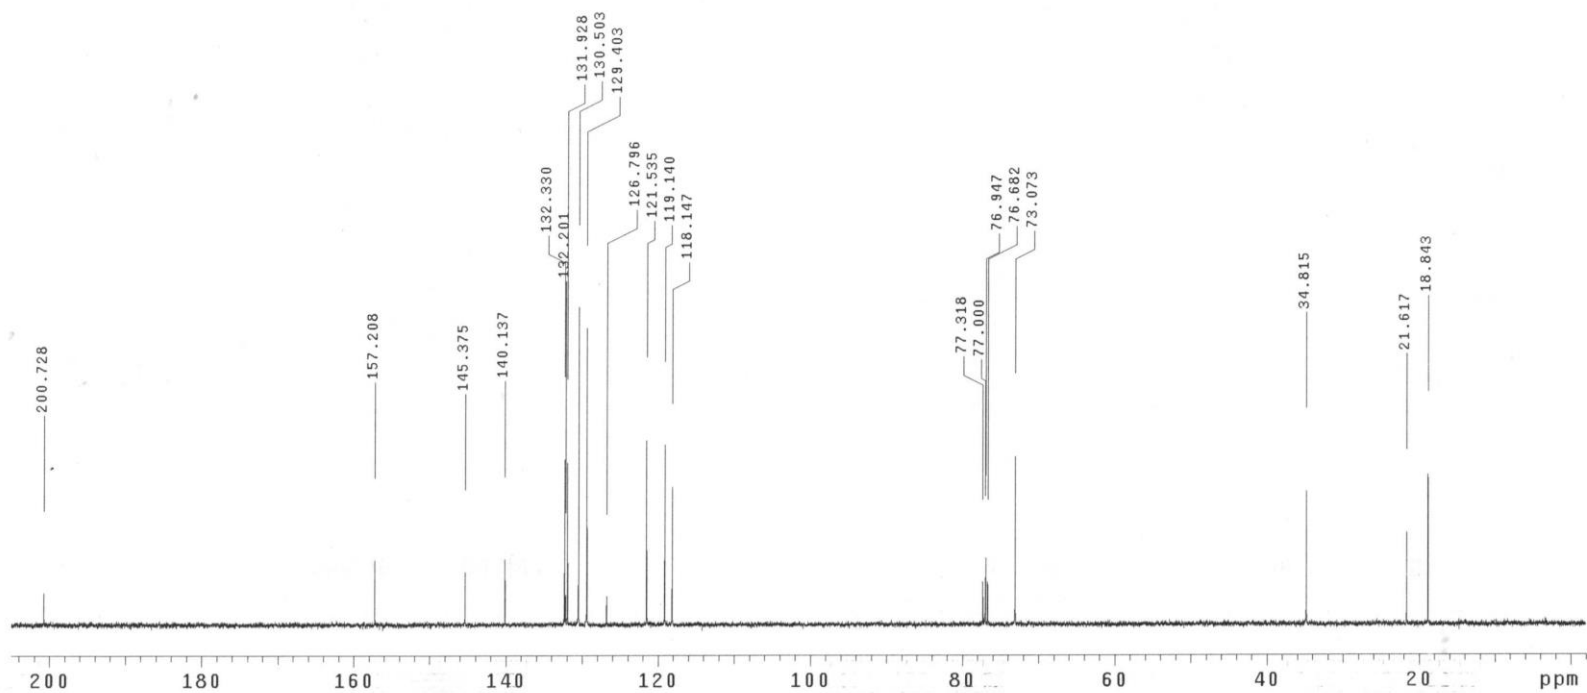

# Compound 4w (<sup>1</sup>H-NMR spectral data)

510212

NC1090318

Pulse Sequence: s2pu1  
 UNITYplus-400 "unity400"  
 Date: Mar 19 2020  
 Solvent: CDC13  
 Ambient temperature  
 Total 32 repetitions

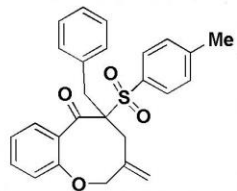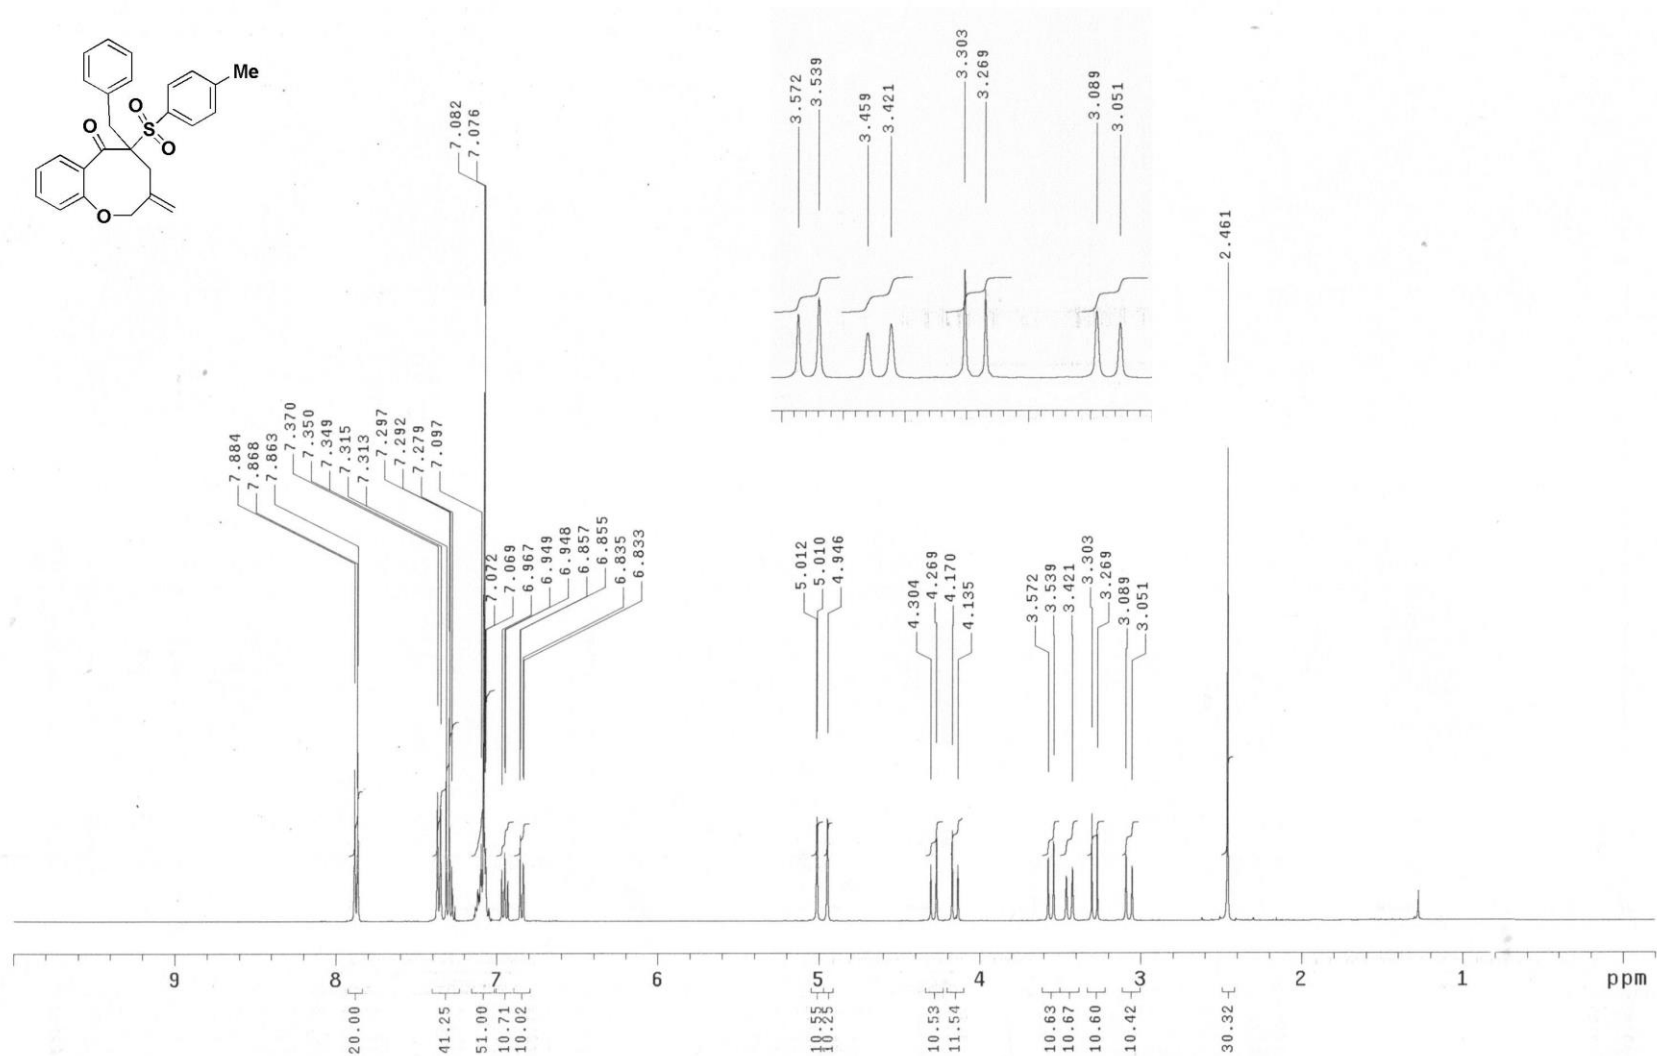

# Compound 4w (<sup>13</sup>C-NMR spectral data)

NC1090318

Pulse Sequence: s2pu1

UNITYplus-400 "unity400"

Date: Mar 19 2020

Solvent: CDCl<sub>3</sub>

Ambient temperature

Total 512 repetitions

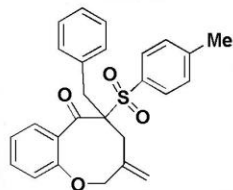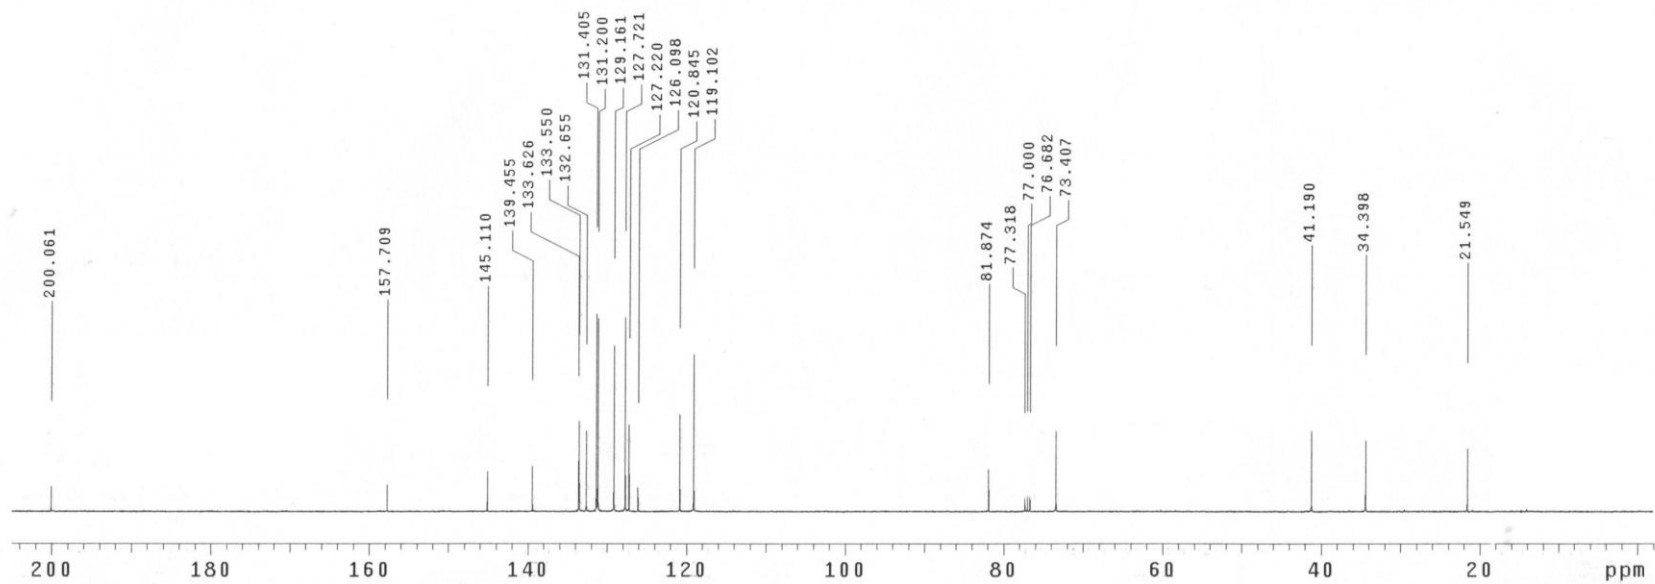

# Compound 4x (<sup>1</sup>H-NMR spectral data)

NC1090417

Pulse Sequence: s2pu1

UNITYplus-400 "unity400"

Date: Apr 17 2020

Solvent: CDCl<sub>3</sub>

Ambient temperature

Total 32 repetitions

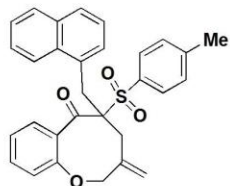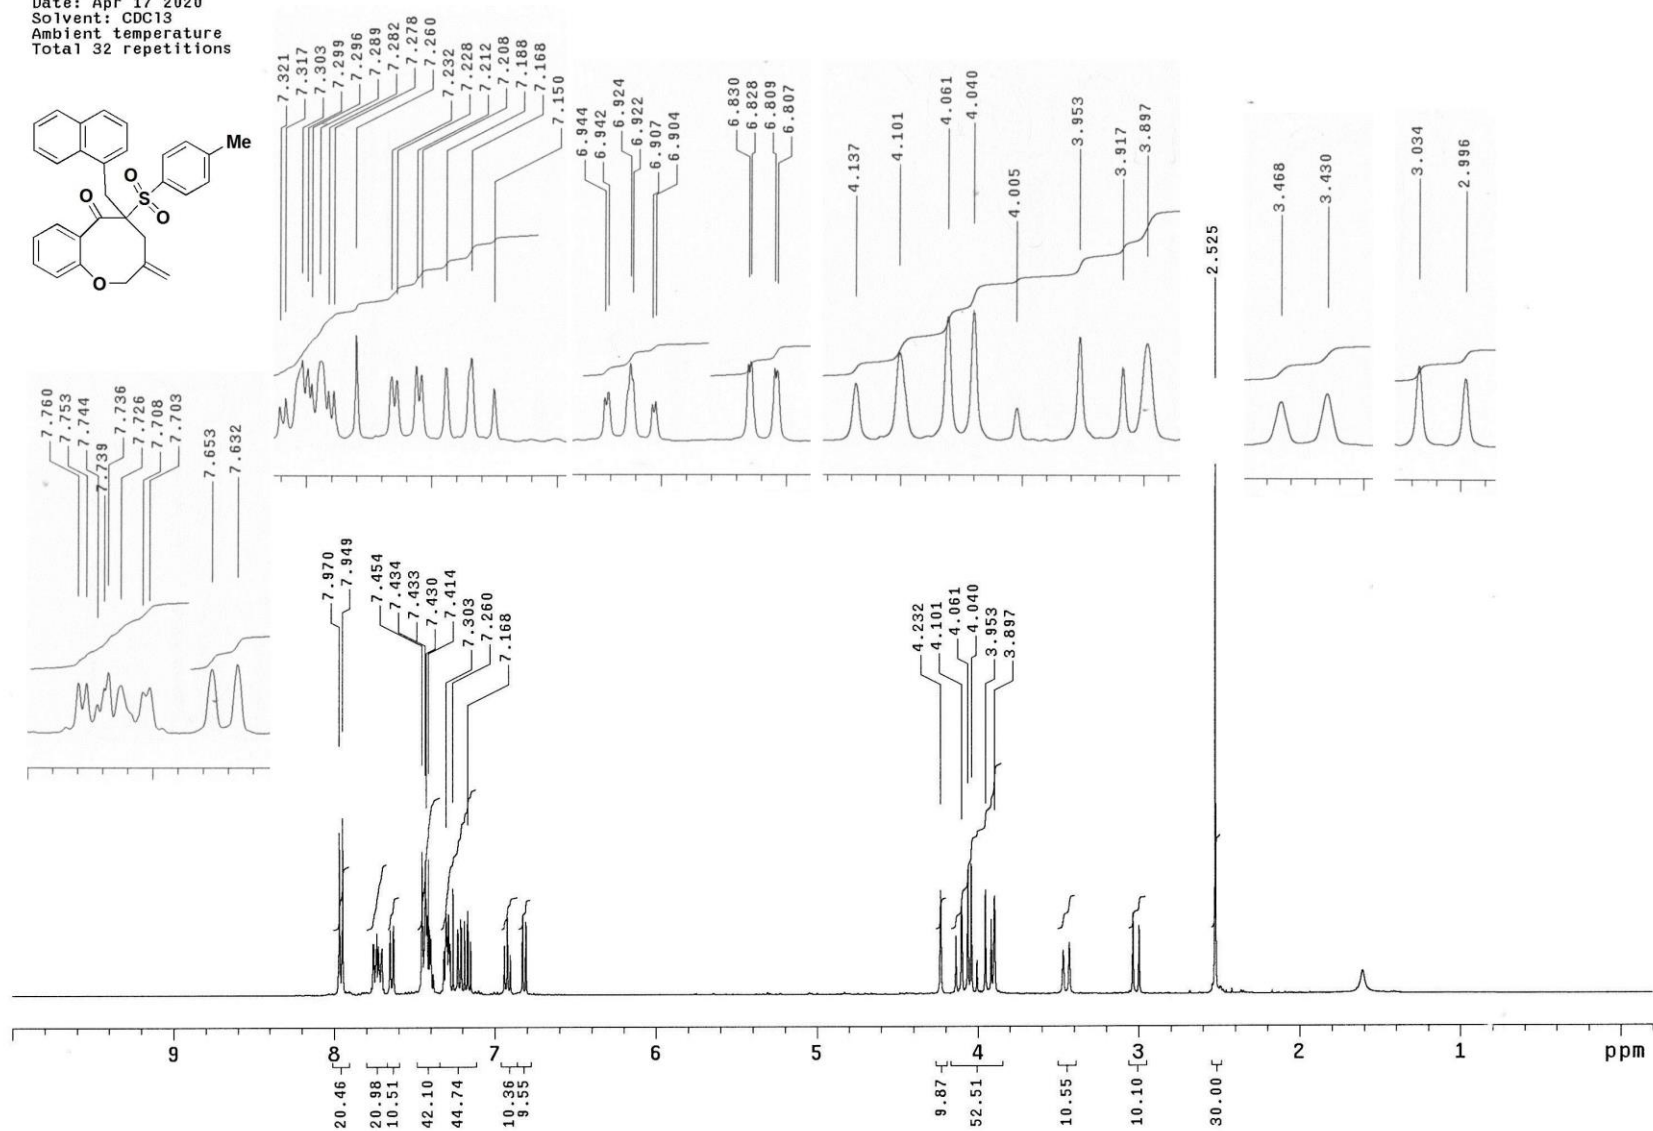



# Compound 4x (<sup>13</sup>C-NMR spectral data)

NC1090417

Pulse Sequence: s2pu1  
UNITYplus-400 "unity400"  
Date: Apr 17 2020  
Solvent: CDCl<sub>3</sub>  
Ambient temperature  
Total 1792 repetitions

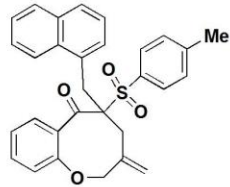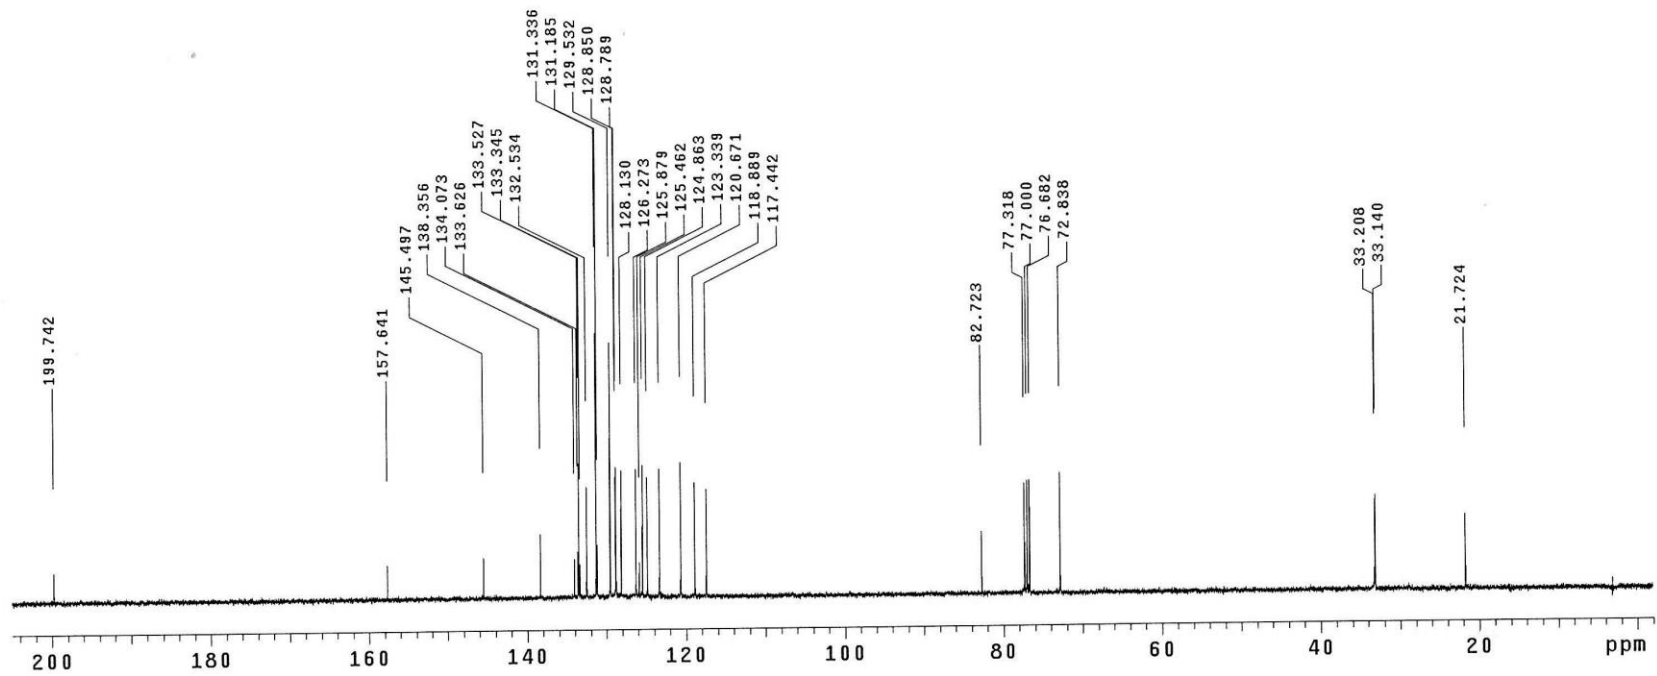

# Compound 4y (<sup>1</sup>H-NMR spectral data)

NC1090110

Pulse Sequence: s2pu1  
UNITYplus-400 "unity400"  
Date: Jan 10 2020  
Solvent: CDCl<sub>3</sub>  
Ambient temperature  
Total 32 repetitions

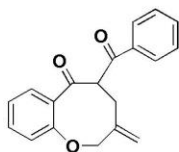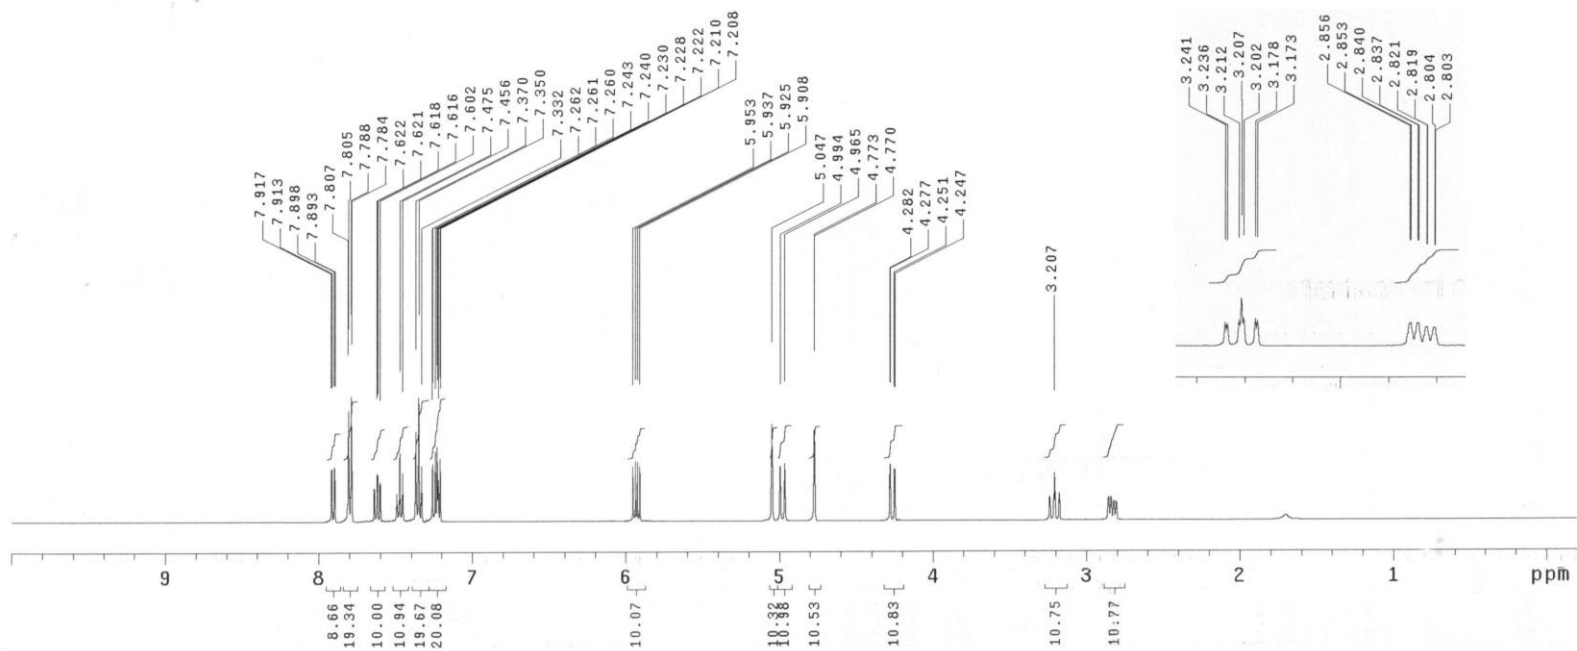

# Compound 4y (<sup>13</sup>C-NMR spectral data)

NC1090110

Pulse Sequence: s2pu1  
UNITYplus-400 "unity400"  
Date: Jan 10 2020  
Solvent: CDCl<sub>3</sub>  
Ambient temperature  
Total 448 repetitions

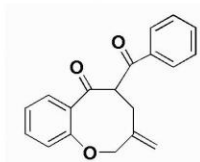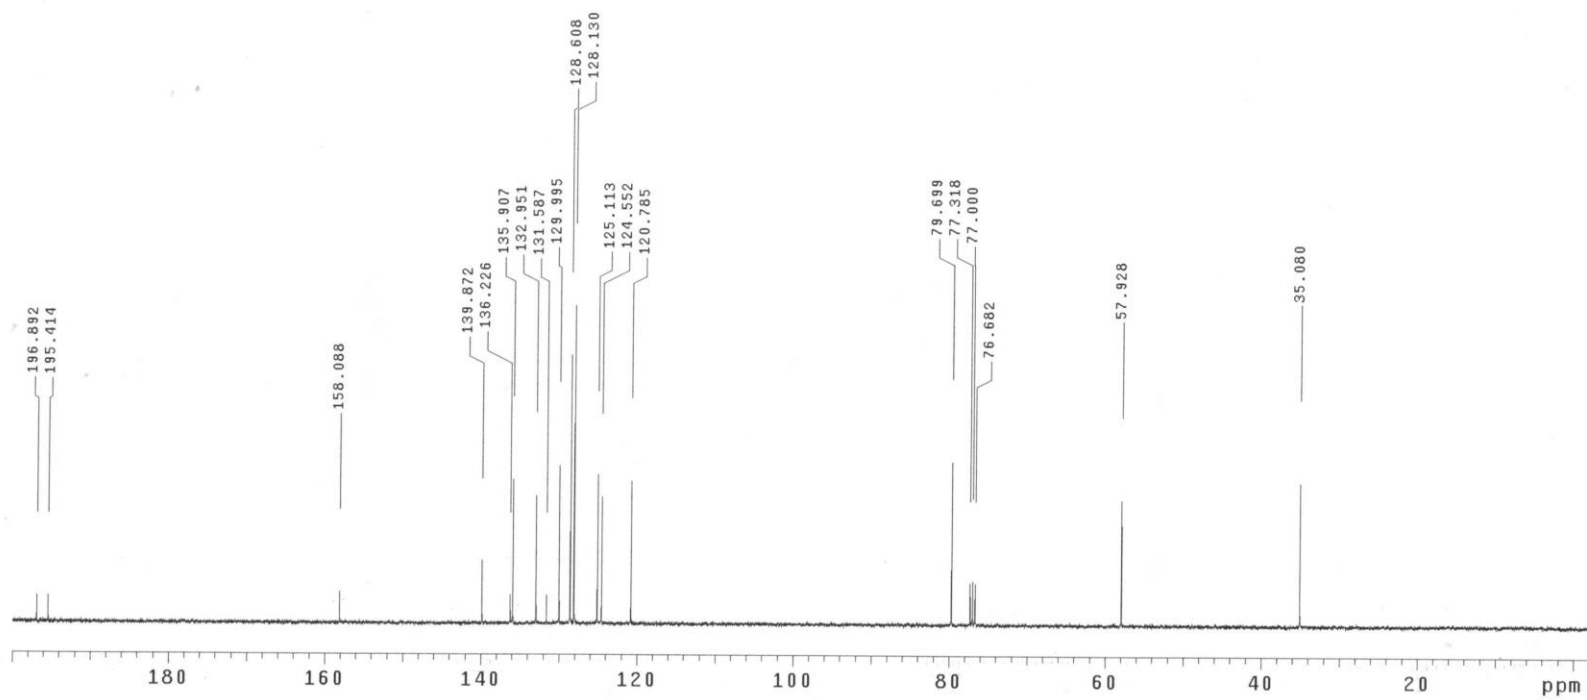

# Compound 4z (<sup>1</sup>H-NMR spectral data)

NC1090911

Pulse Sequence: s2pu1

UNITYplus-400 "unity400"

Date: Nov 6 2020

Solvent: CDCl<sub>3</sub>

Ambient temperature

Total 32 repetitions

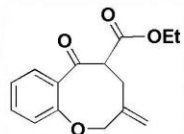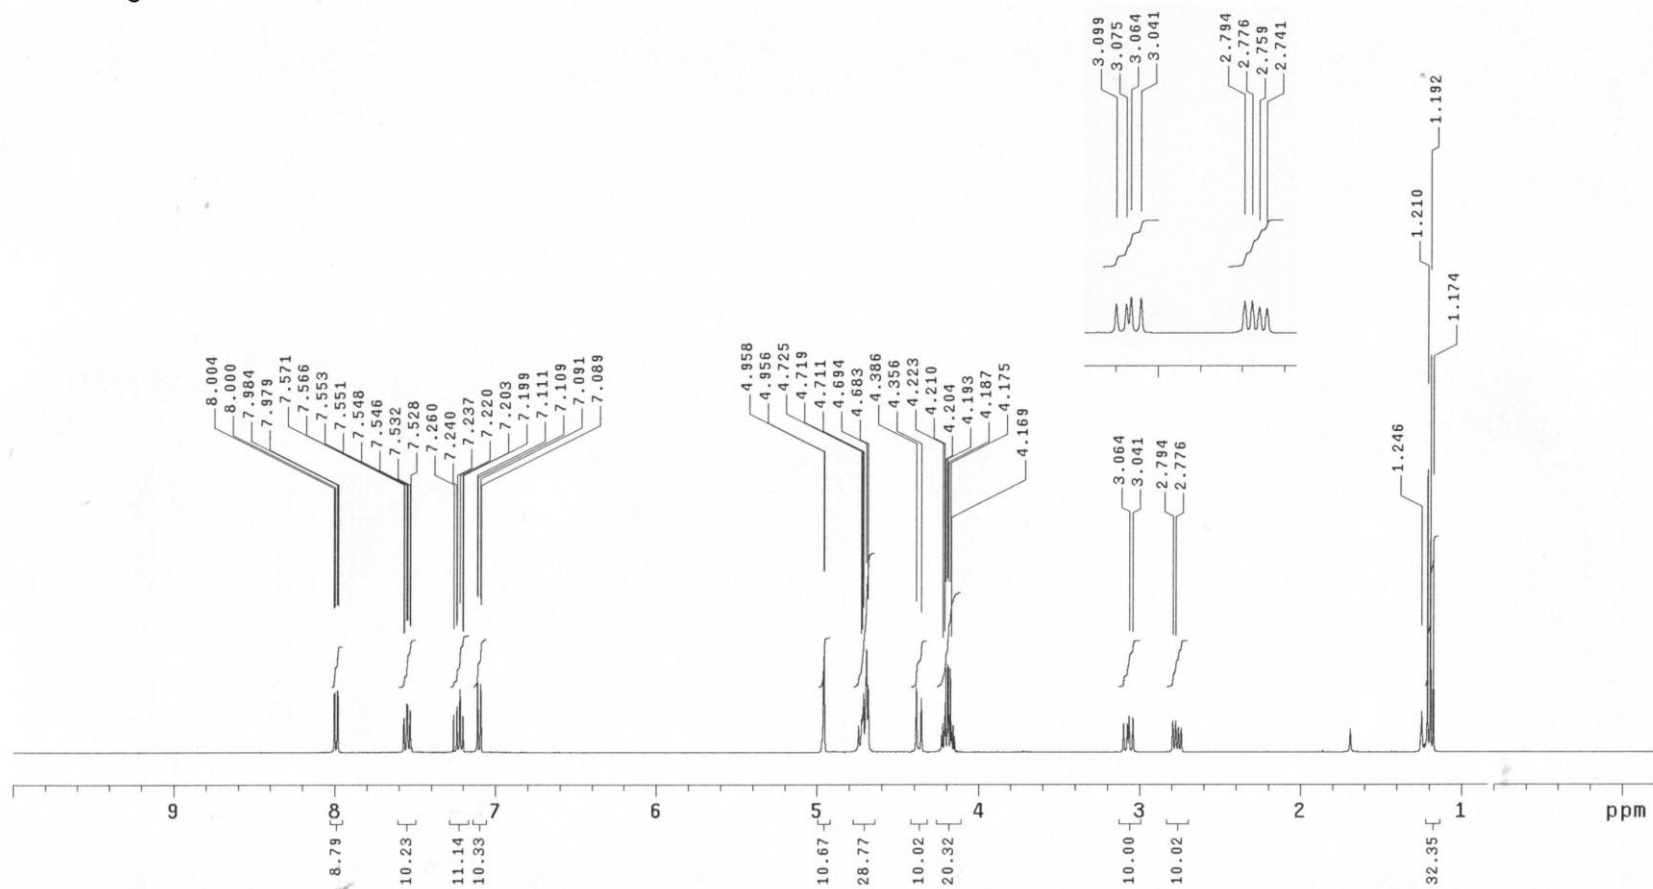

# Compound 4z (<sup>13</sup>C-NMR spectral data)

NC1090911

Pulse Sequence: s2pu1

UNITYplus-400 "unity400"

Date: Nov 6 2020

Solvent: CDCl<sub>3</sub>

Ambient temperature

Total 816 repetitions

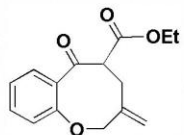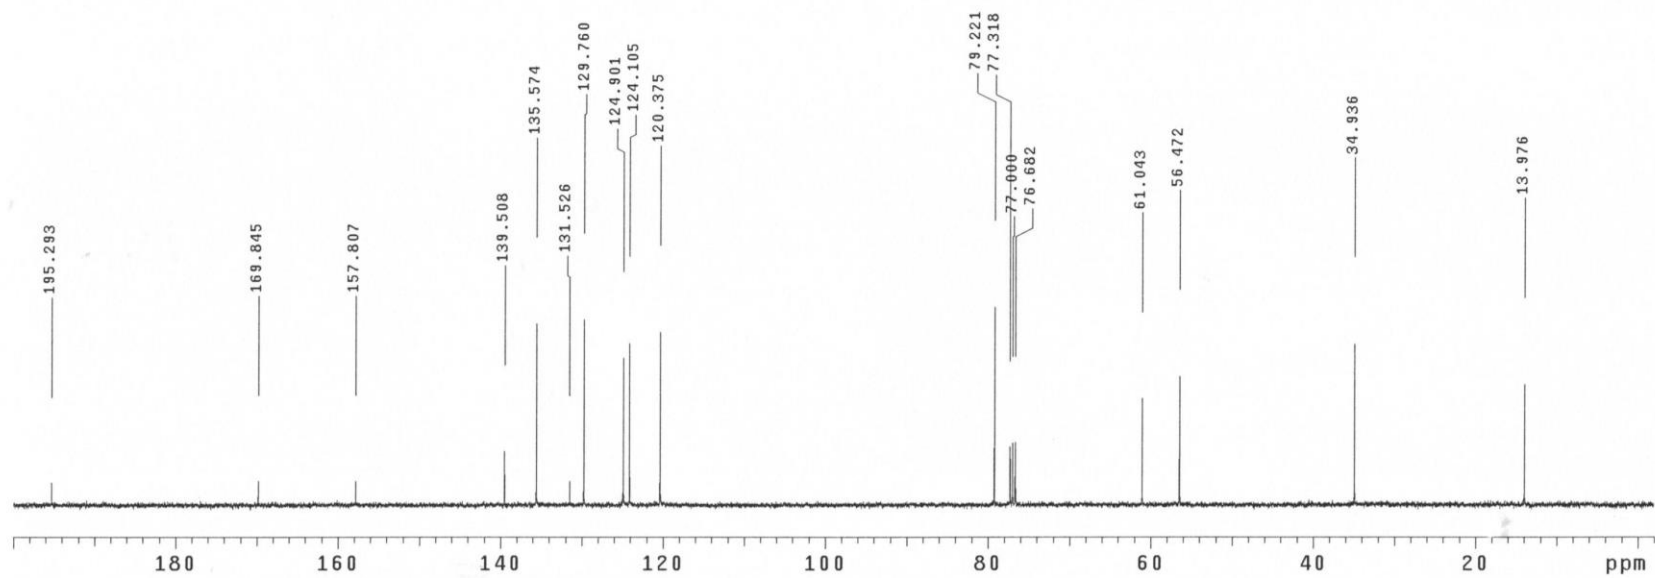

# Compound 4aa (<sup>1</sup>H-NMR spectral data)

NC1090224

Pulse Sequence: s2pu1  
 UNITYplus-400 "unity400"  
 Date: Feb 25 2020  
 Solvent: CDC13  
 Ambient temperature  
 Total 64 repetitions

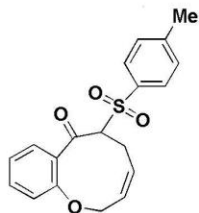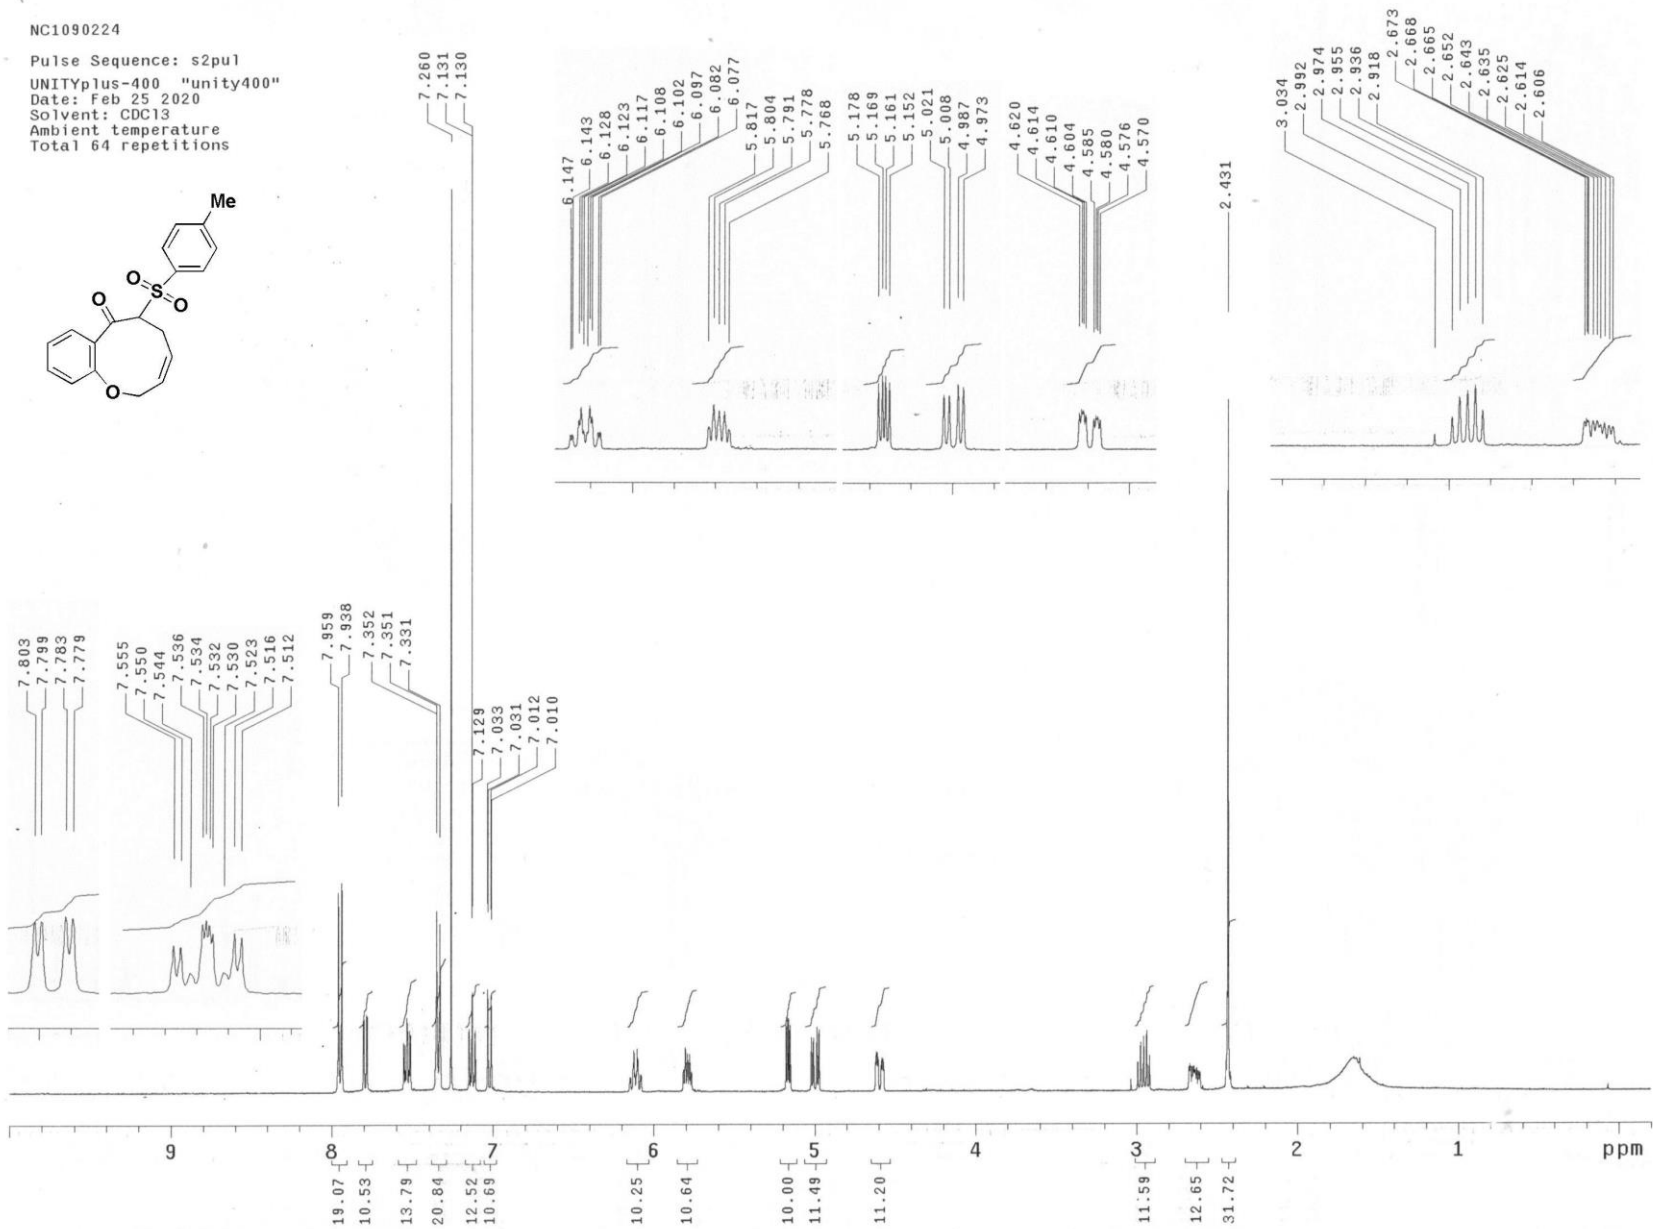

# Compound 4aa (<sup>13</sup>C-NMR spectral data)

NC1090224

Pulse Sequence: s2pu1  
UNITYplus-400 "unity400"  
Date: Feb 25 2020  
Solvent: CDCl<sub>3</sub>  
Ambient temperature  
Total 32896 repetitions

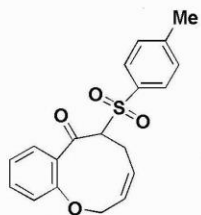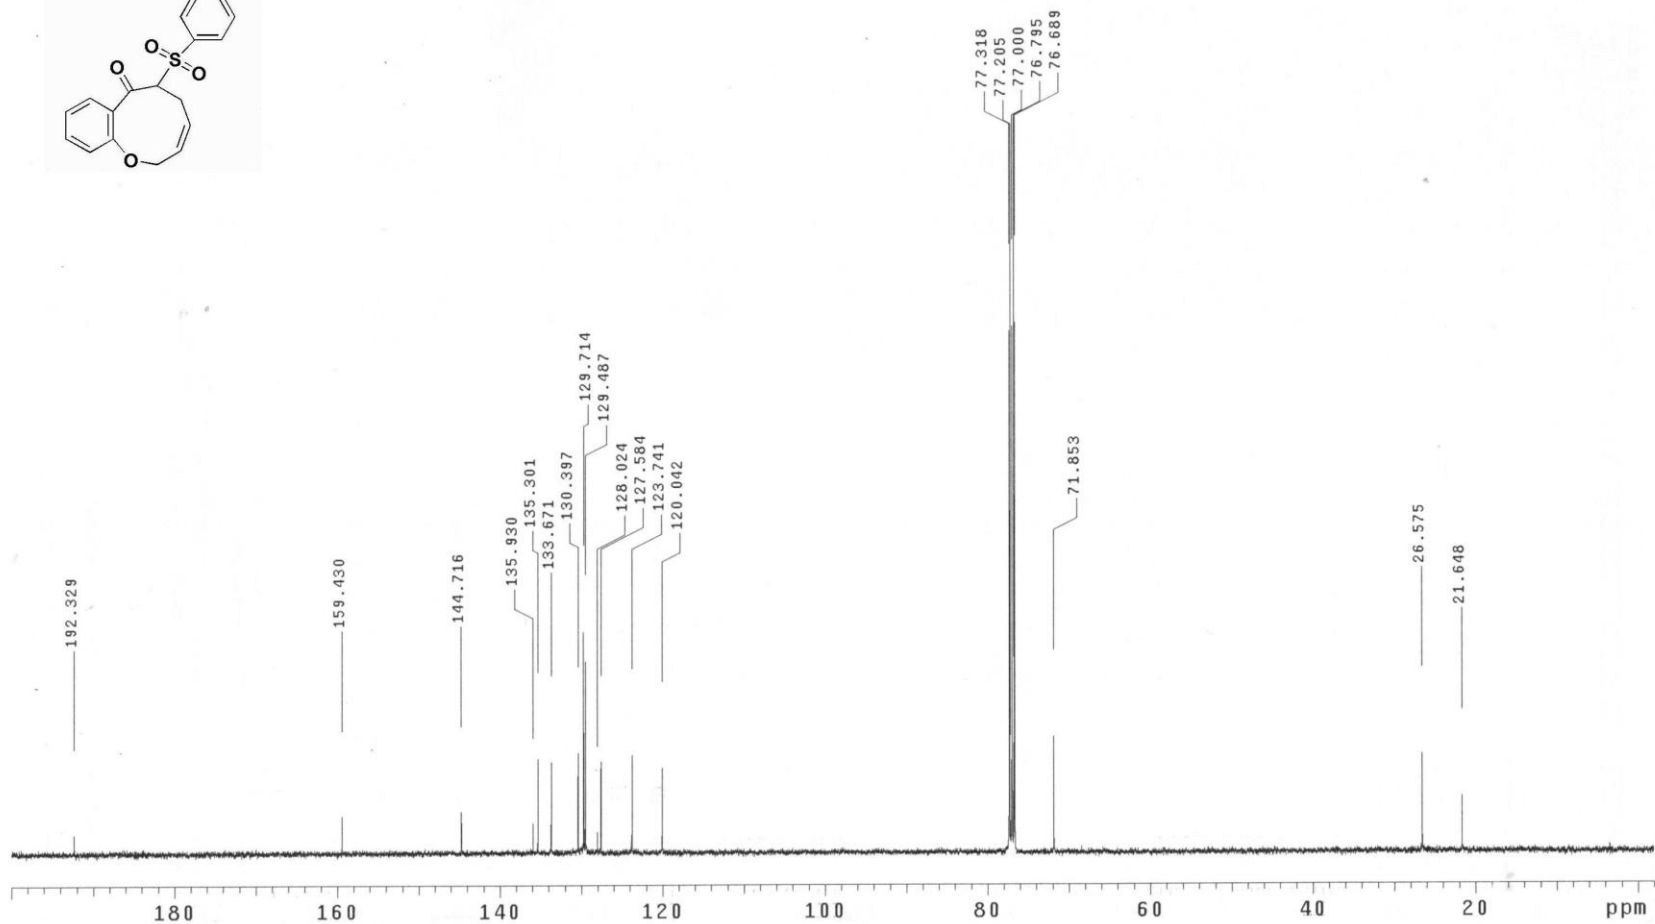

# Compound 6a (<sup>1</sup>H-NMR spectral data)

NCMsN19

Pulse Sequence: s2pul

UNITYplus-400 "unity400"

Date: Dec 16 2019

Solvent: CDC13

Ambient temperature

Total 32 repetitions

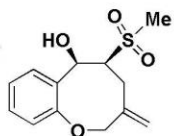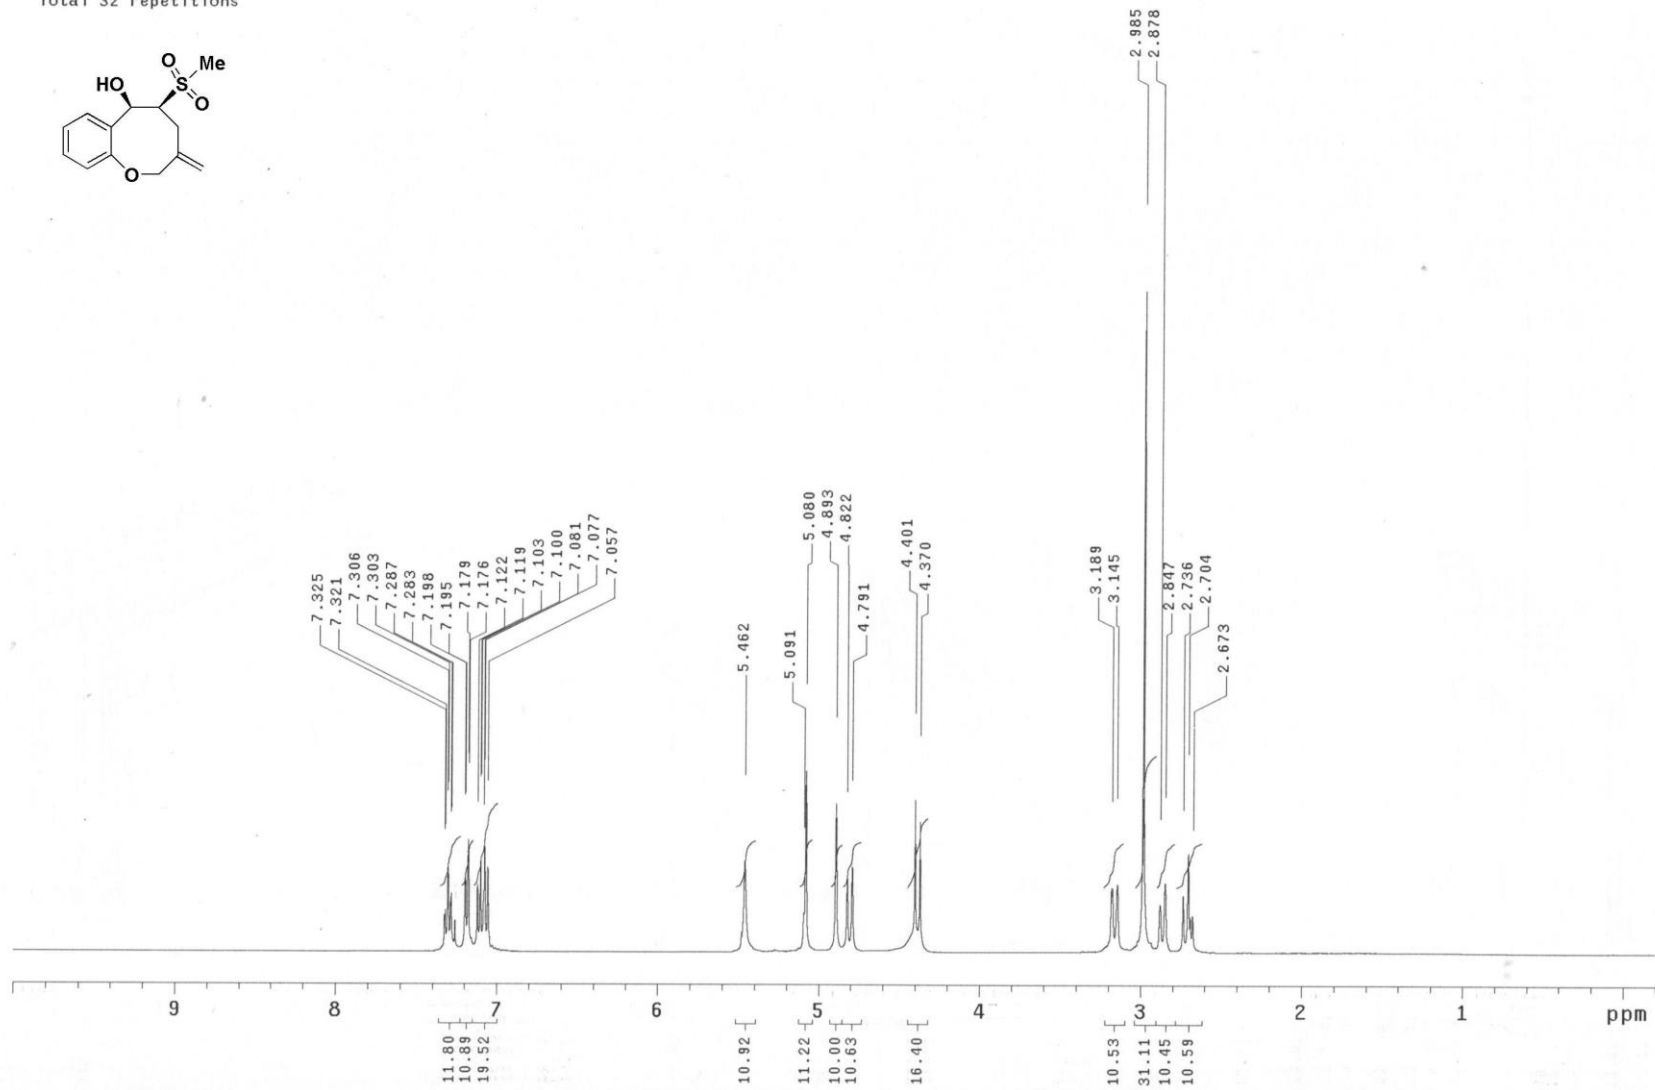



# Compound 6a (<sup>13</sup>C-NMR spectral data)

NCMsN19

Pulse Sequence: s2pu1

UNITYplus-400 "unity400"

Date: Dec 16 2019

Solvent: CDCl<sub>3</sub>

Ambient temperature

Total 3728 repetitions

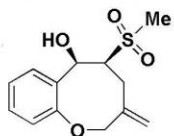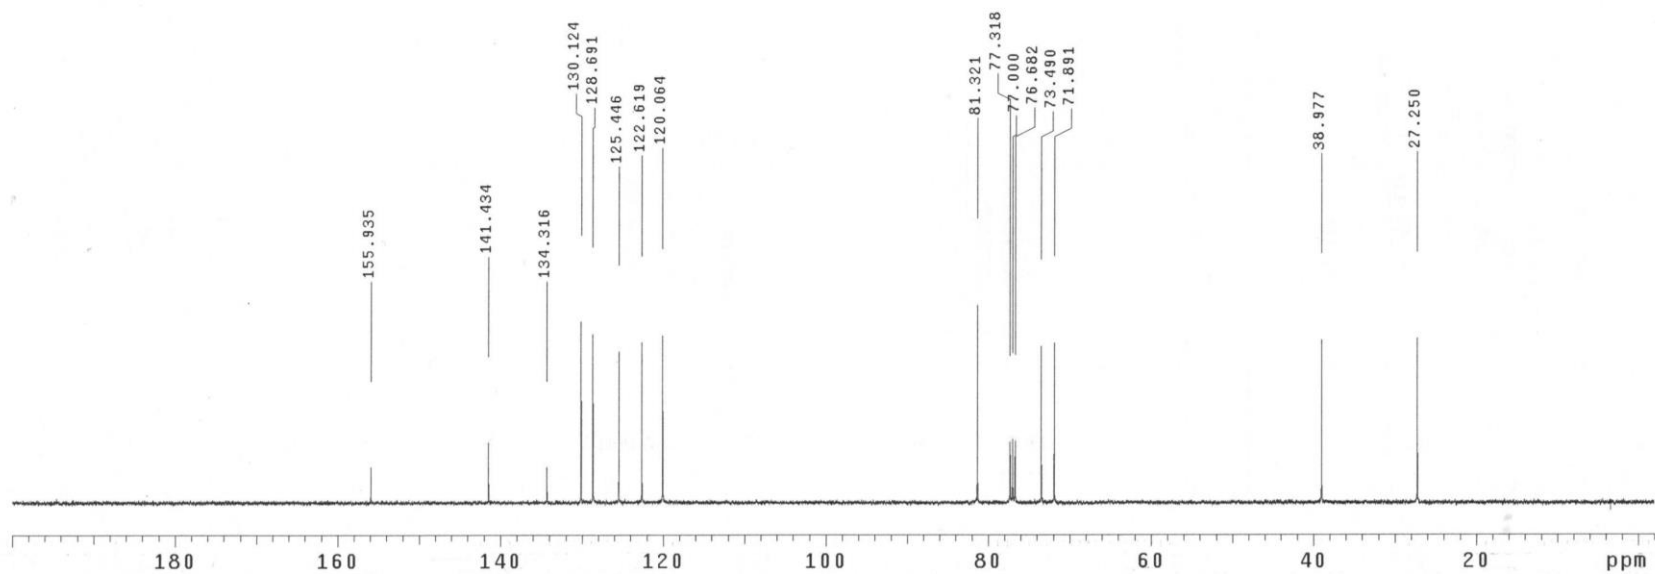

# Compound 5a (<sup>1</sup>H-NMR spectral data)

NC1129NB

Pulse Sequence: s2pu1

UNITYplus-400 "unity400"

Date: Dec 20 2019

Solvent: CDC13

Ambient temperature

Total 32 repetitions

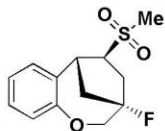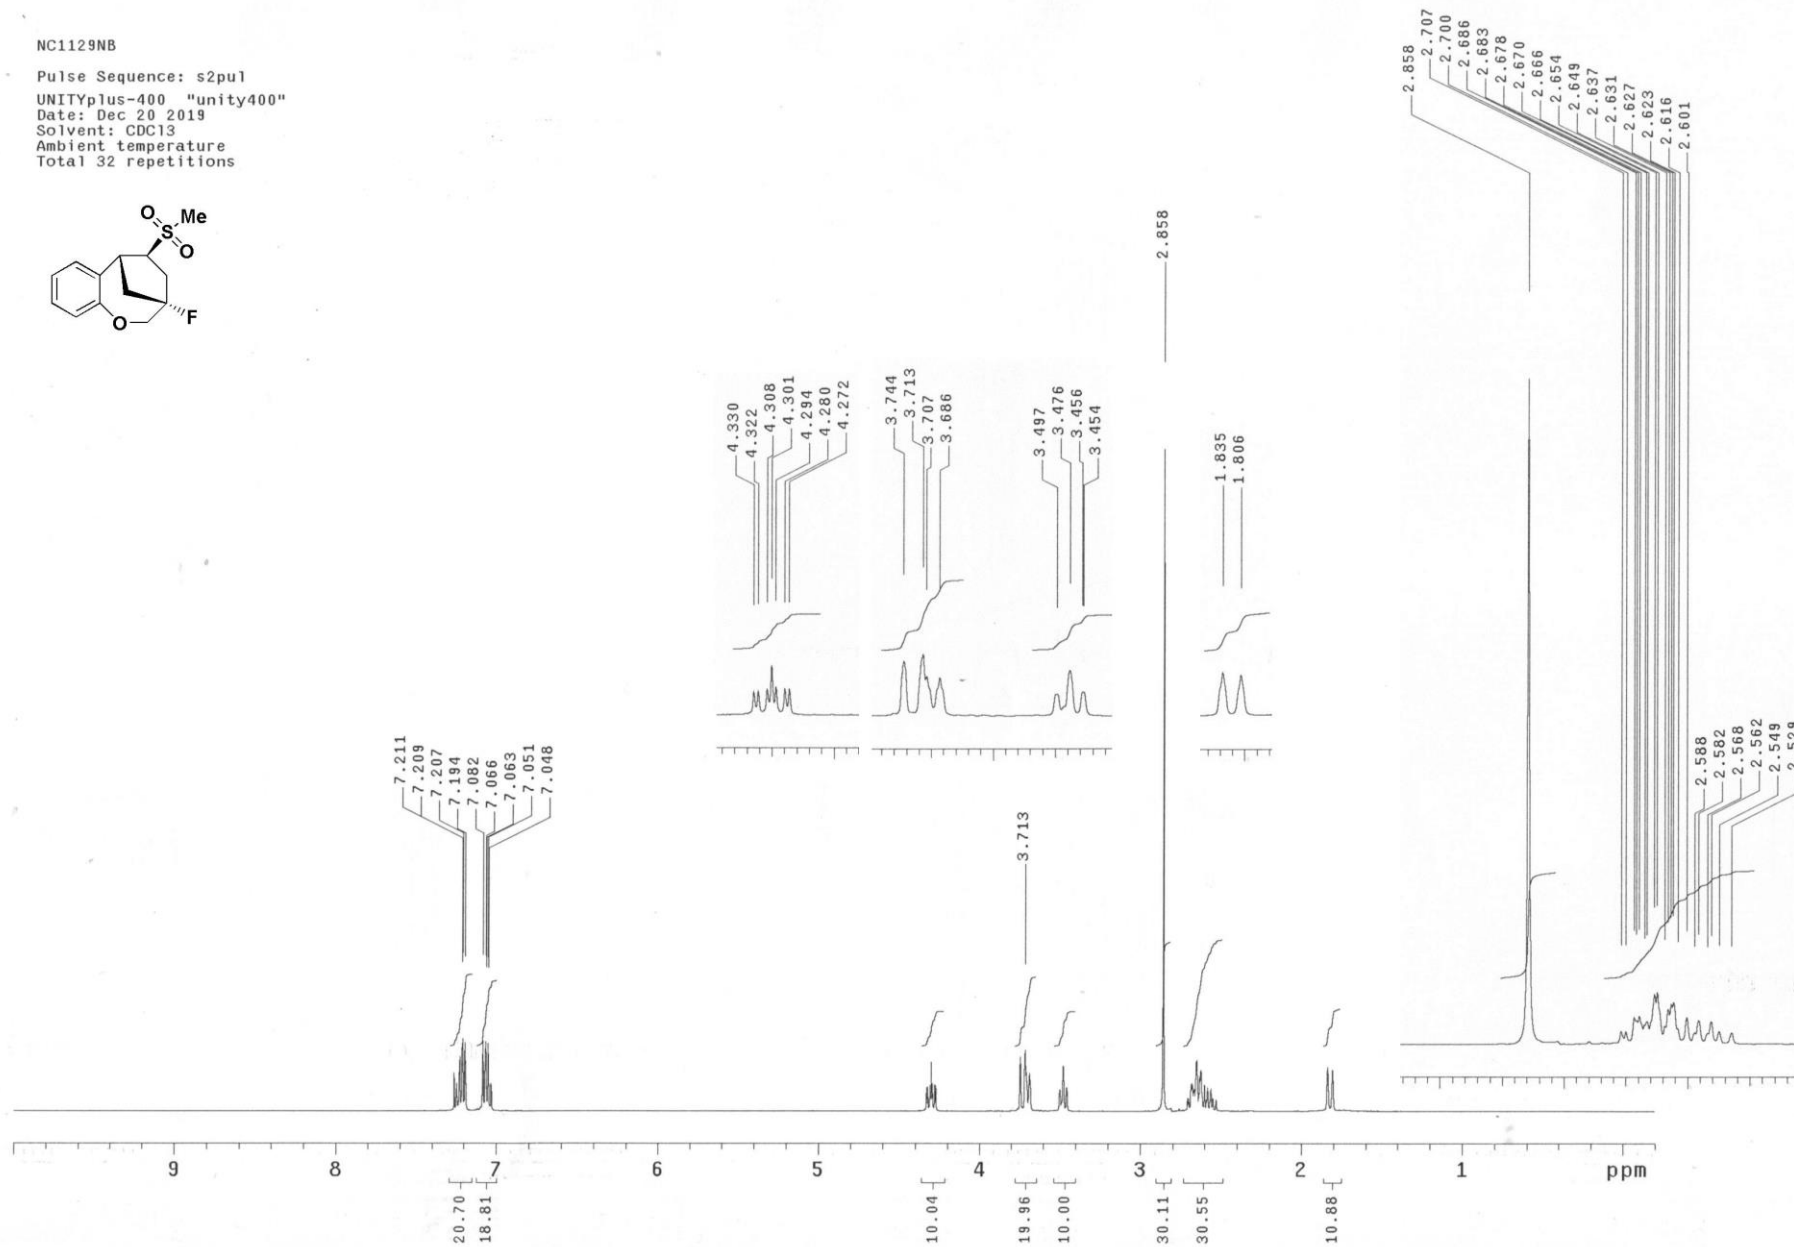

# Compound 5a (<sup>13</sup>C-NMR spectral data)

NC1129NB

Pulse Sequence: s2pu1  
UNITYplus-400 "unity400"  
Date: Dec 20 2019  
Solvent: CDC13  
Ambient temperature  
Total 560 repetitions

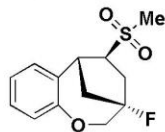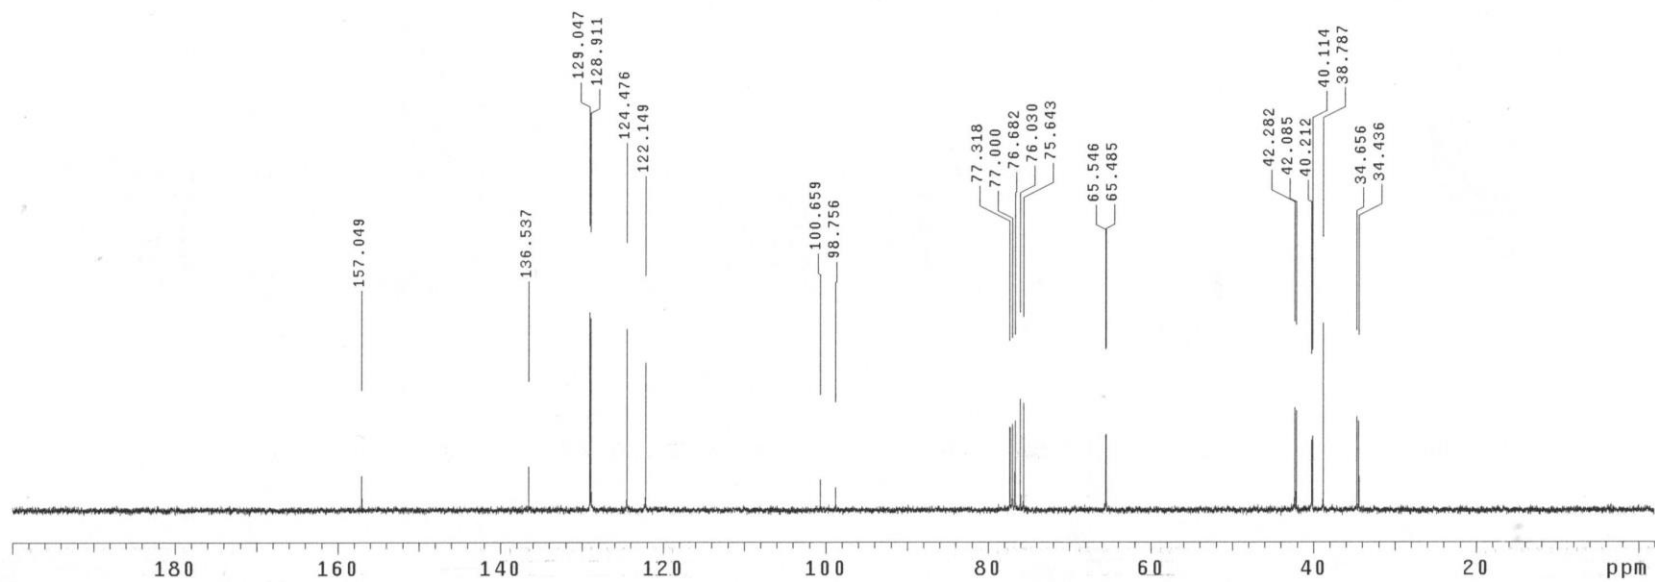

# Compound 5b (<sup>1</sup>H-NMR spectral data)

NCBu46

Pulse Sequence: s2pu1

UNITYplus-400 "unity400"

Date: Mar 16 2020

Solvent: CDC13

Ambient temperature

Total 64 repetitions

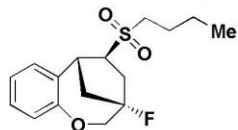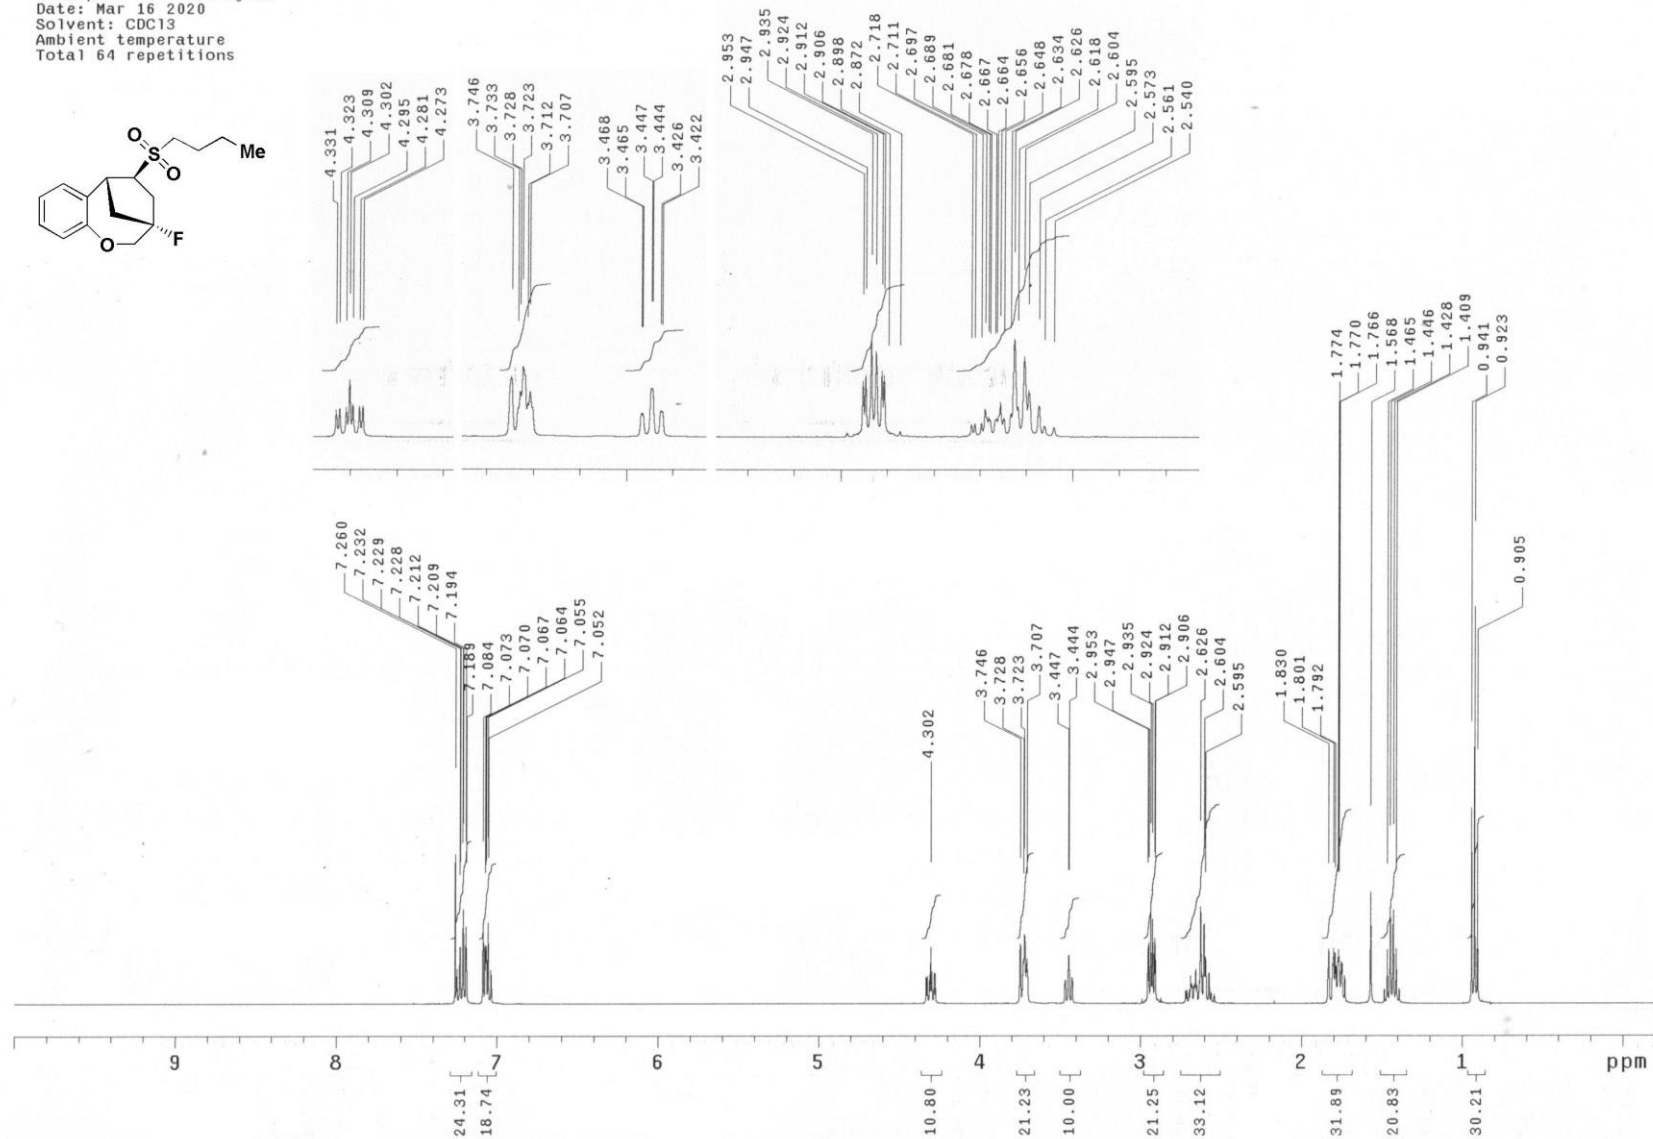

# Compound 5b (<sup>13</sup>C-NMR spectral data)

NCBu46

Pulse Sequence: s2pu1

UNITYplus-400 "unity400"

Date: Mar 16 2020

Solvent: CDC13

Ambient temperature

Total 5616 repetitions

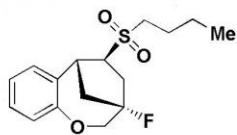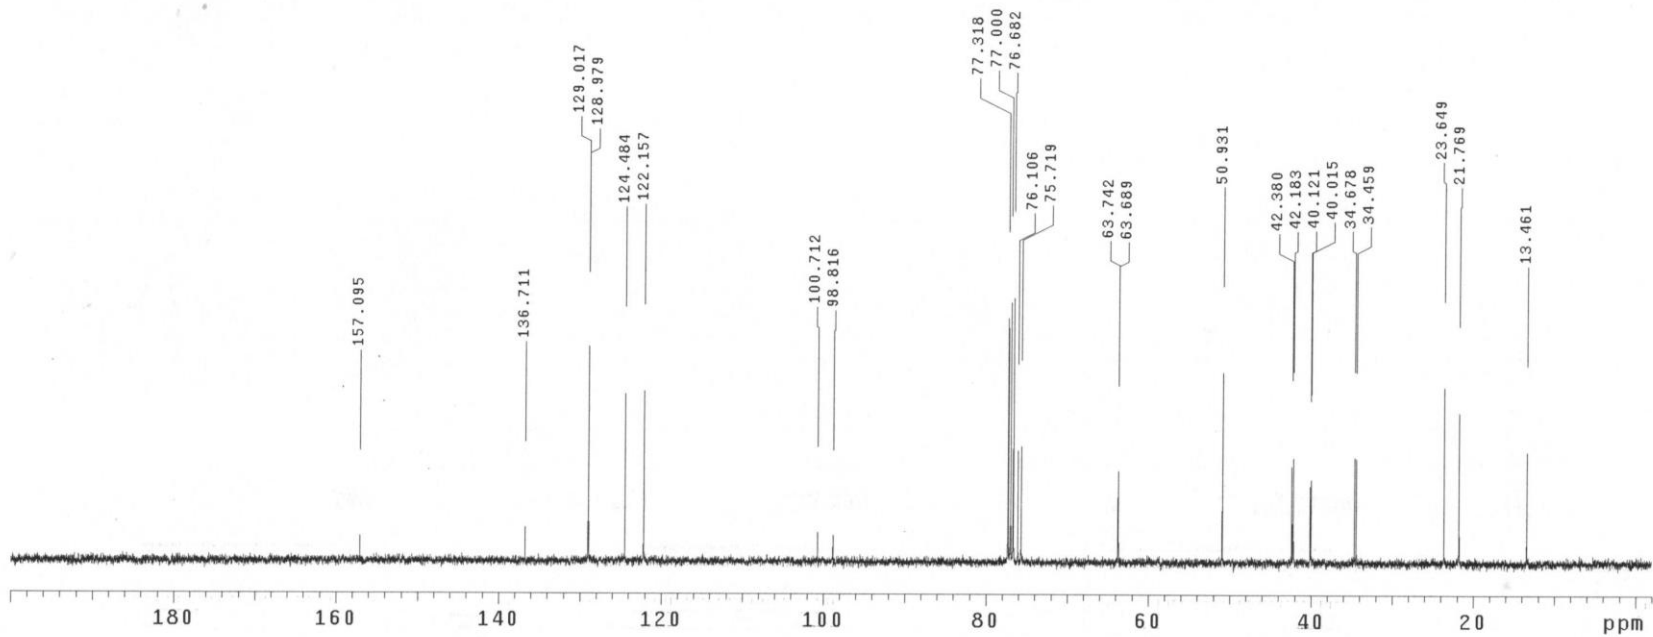

# Compound 5c (<sup>1</sup>H-NMR spectral data)

NC1128NB

Pulse Sequence: s2pu1  
 UNITYplus-400 "unity400"  
 Date: Dec 13 2019  
 Solvent: CDC13  
 Ambient temperature  
 Total 32 repetitions

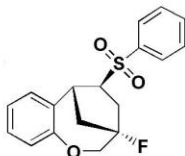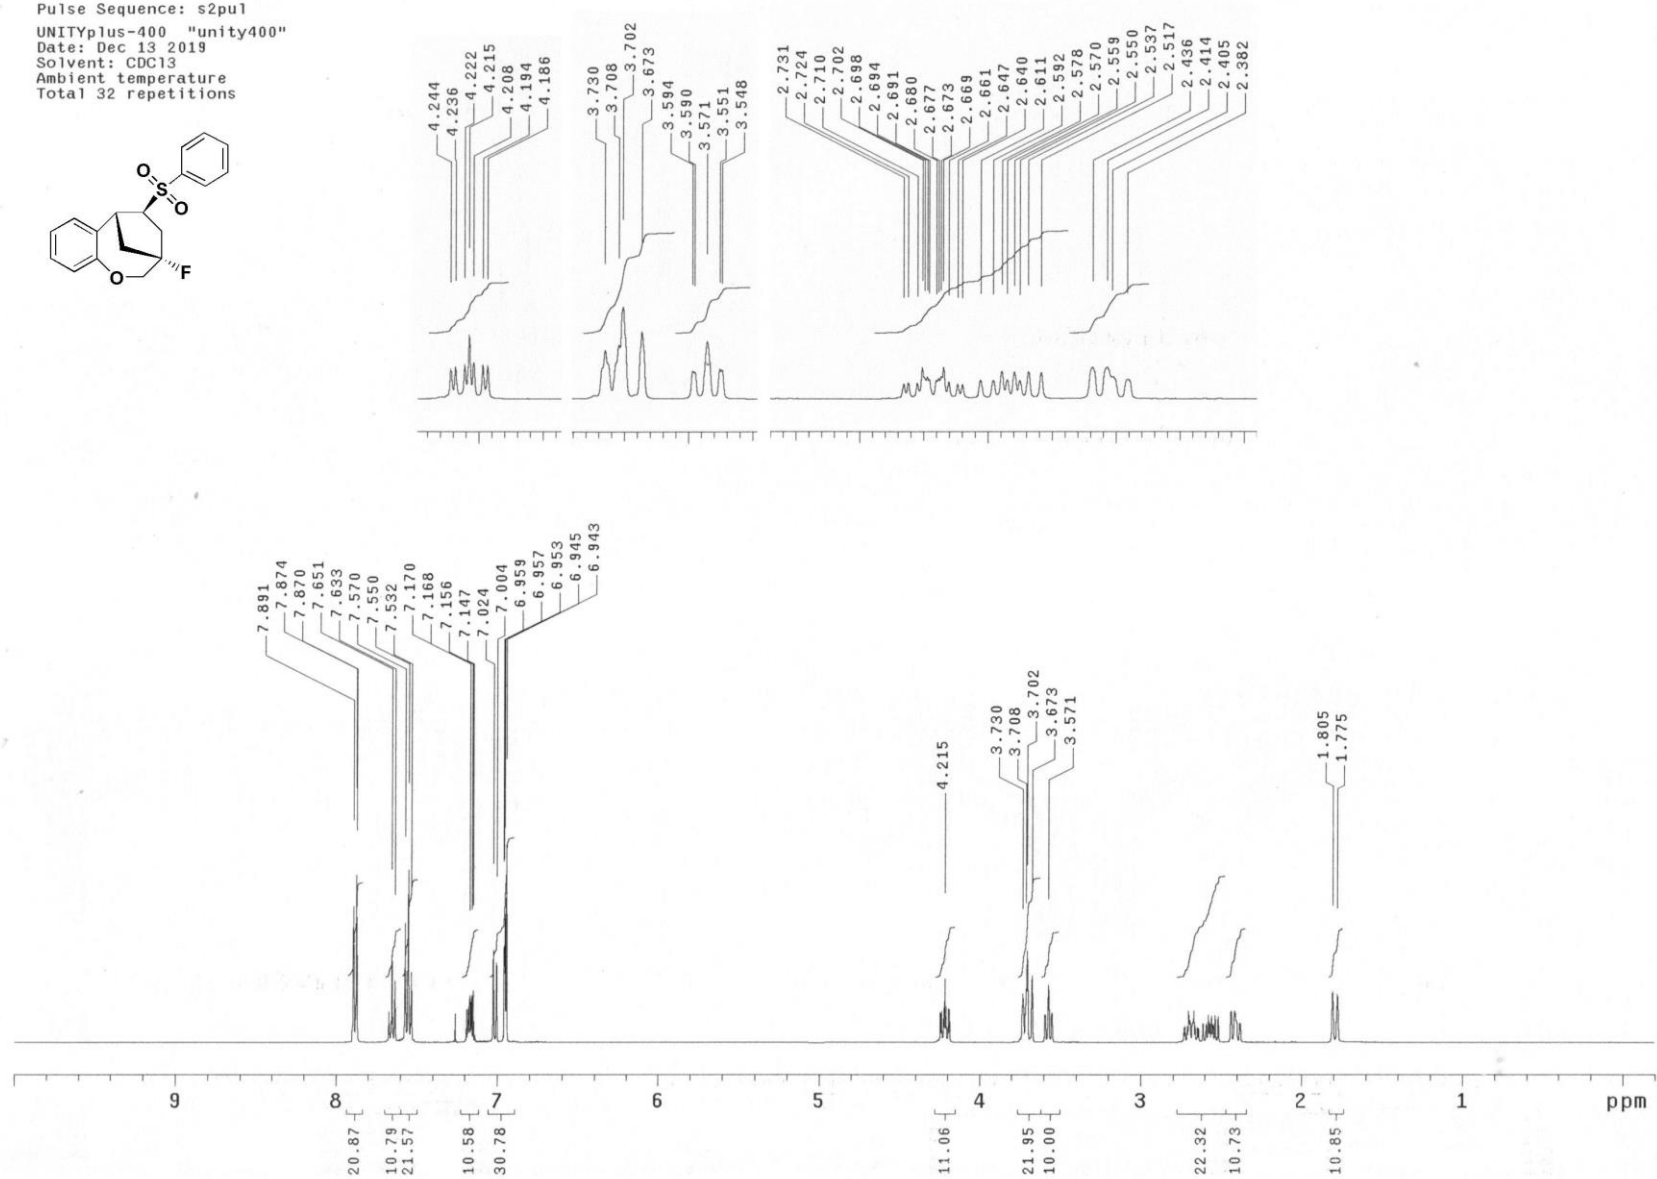

# Compound 5c (<sup>13</sup>C-NMR spectral data)

NC1128NB

Pulse Sequence: s2pu1

UNITYplus-400 "unity400"

Date: Dec 13 2019

Solvent: CDCl<sub>3</sub>

Ambient temperature

Total 528 repetitions

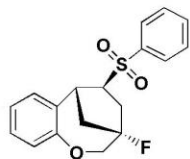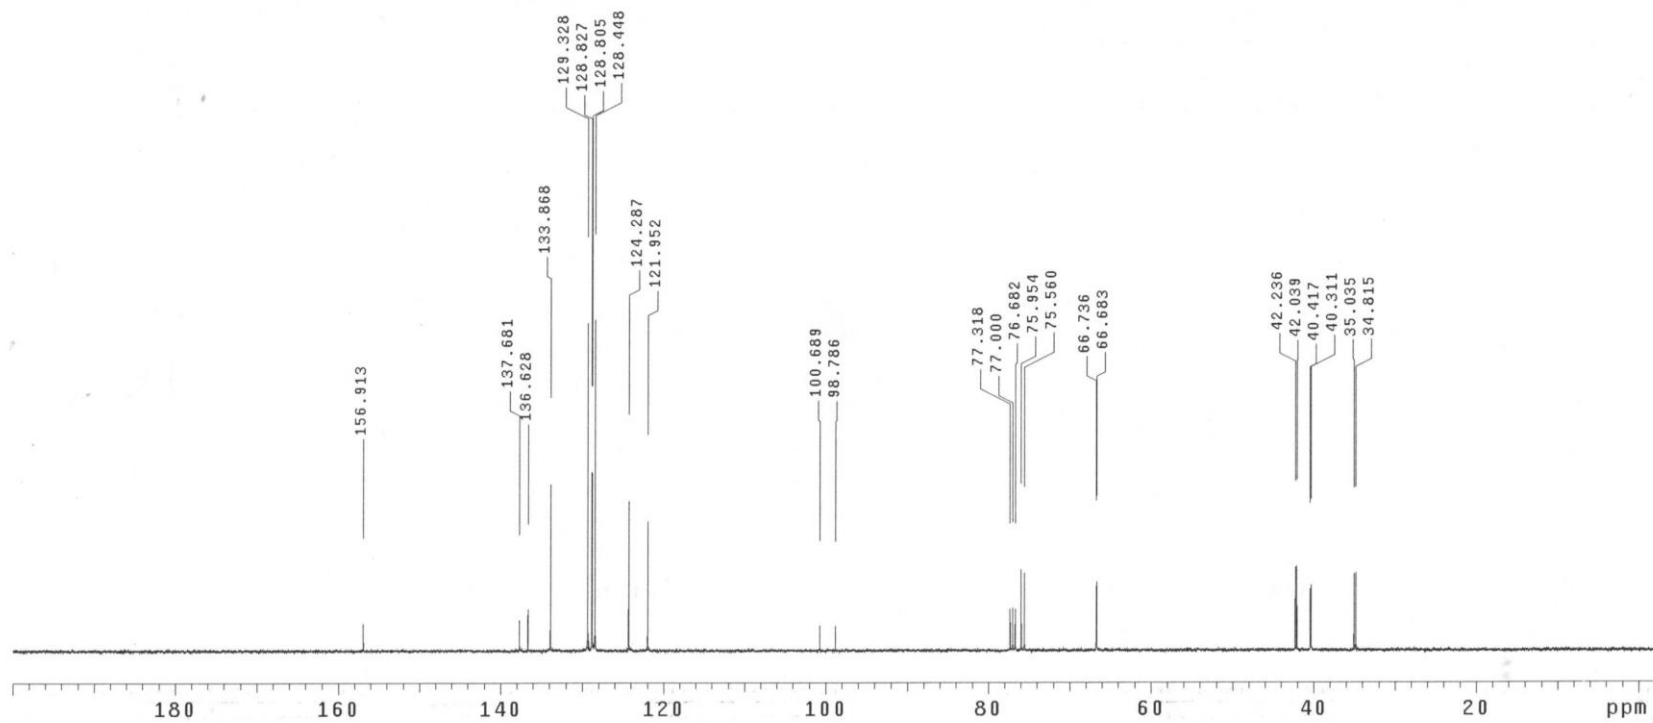

# Compound 5d (<sup>1</sup>H-NMR spectral data-1)

NC8RNB

Pulse Sequence: s2pu1  
Mercury-400BB "MerPlus400"  
Date: Nov 25 2019  
Solvent: cdcl3  
Ambient temperature  
Total 32 repetitions

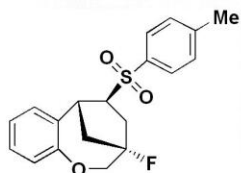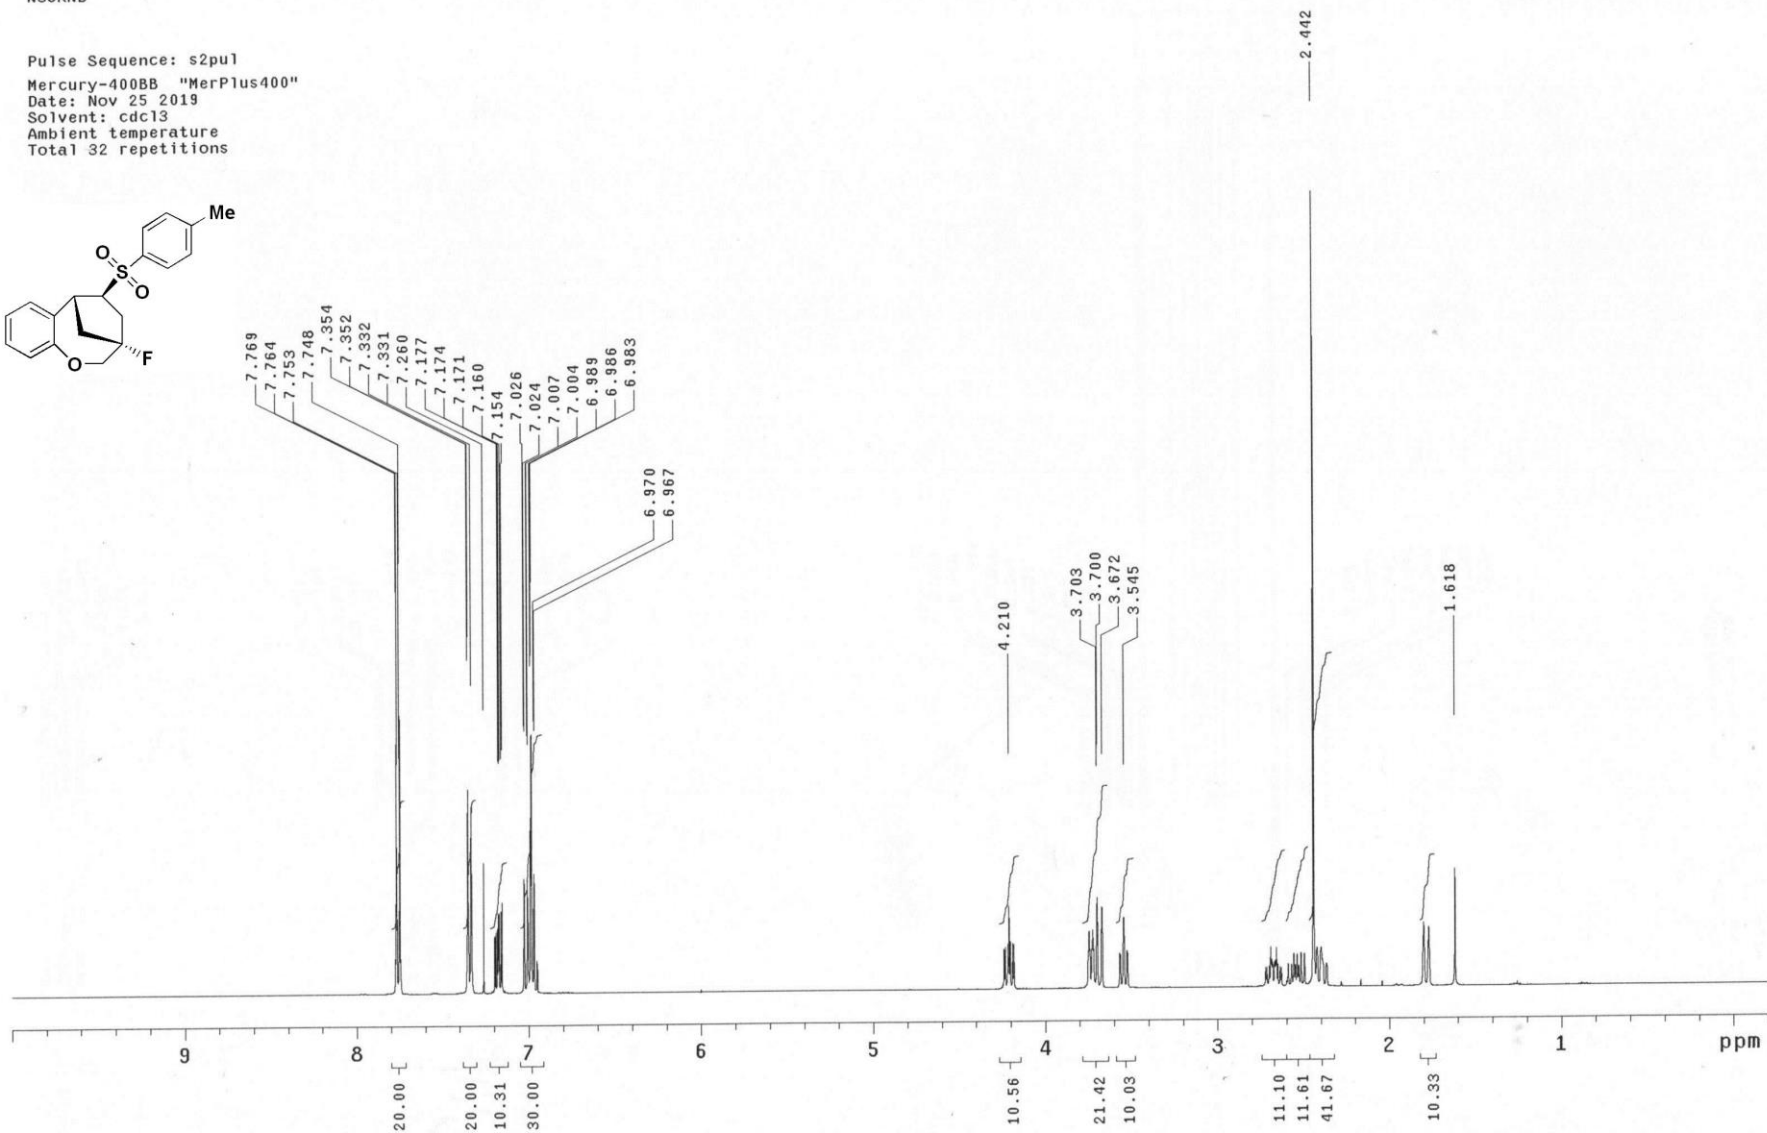



# Compound 5d (<sup>1</sup>H-NMR spectral data-2)

NC8RNB

Pulse Sequence: s2pu1

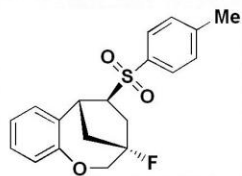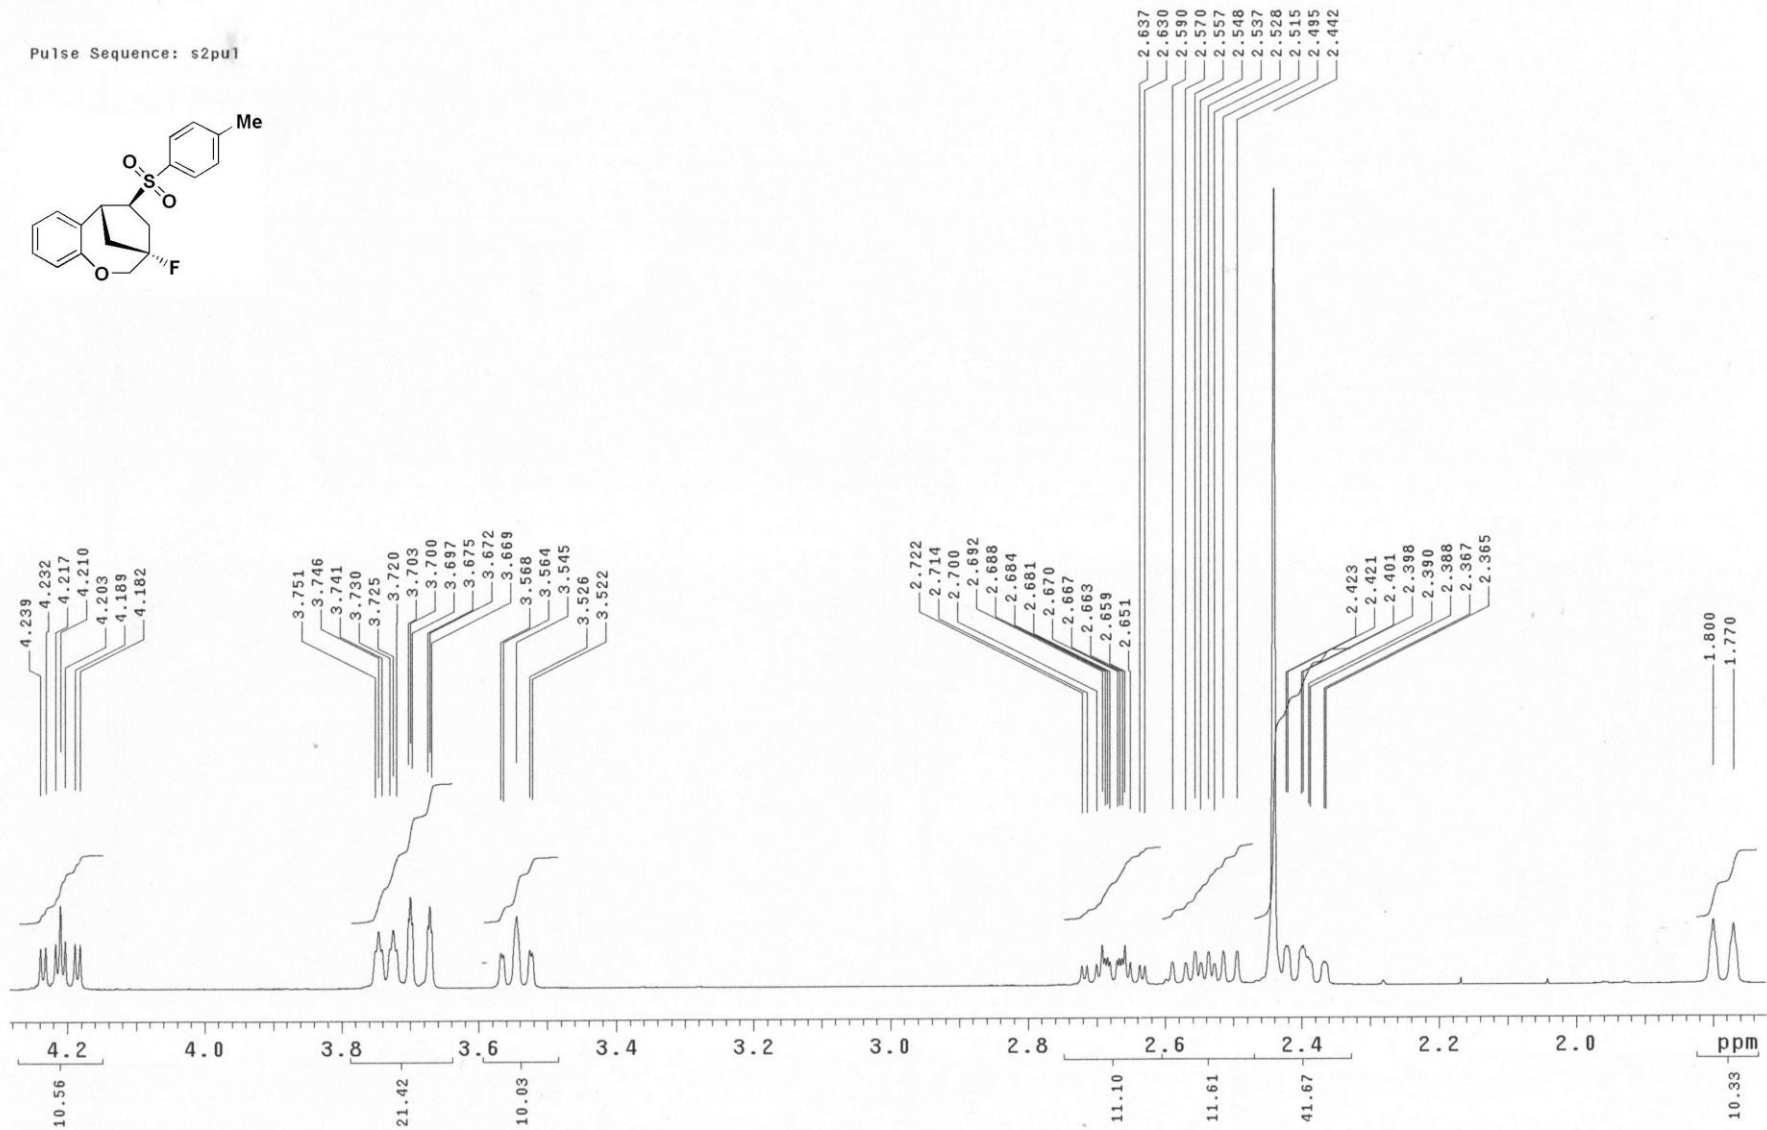

# Compound 5d (<sup>13</sup>C-NMR spectral data)

NC8RNB

Pulse Sequence: s2pu1  
Mercury-400BB "MerPlus400"  
Date: Nov 25 2019  
Solvent: CDCl<sub>3</sub>  
Ambient temperature  
Total 272 repetitions

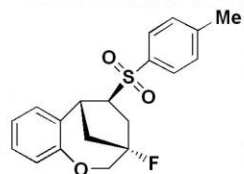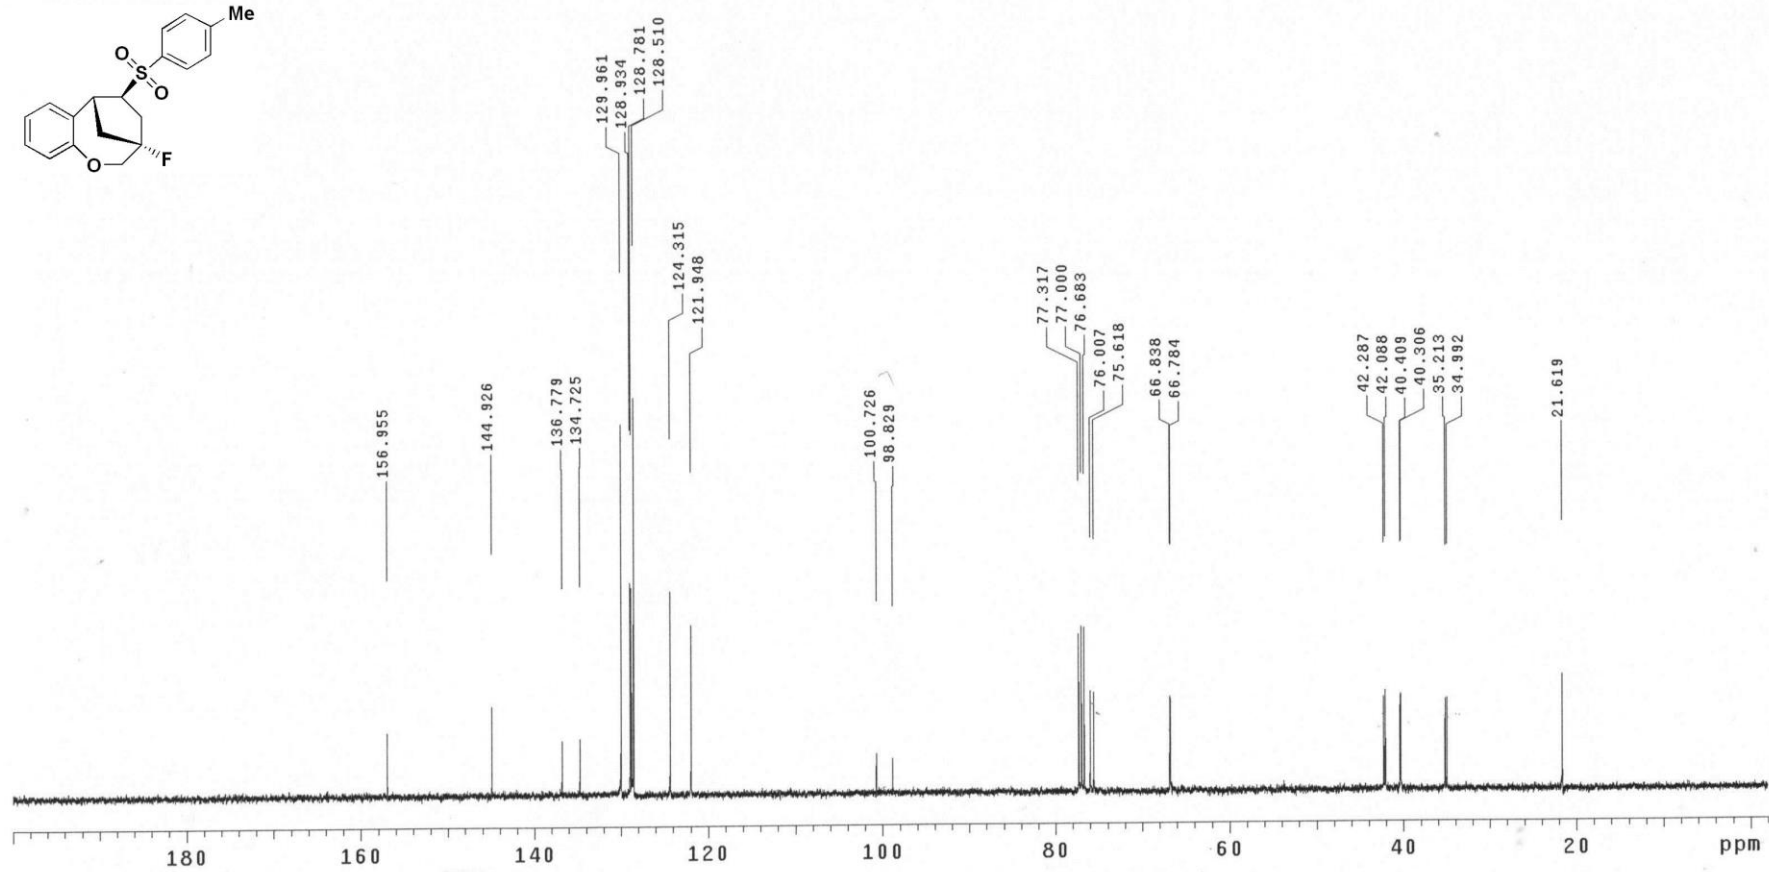

# Compound 5e (<sup>1</sup>H-NMR spectral data-1)

NC1211NB  
Pulse Sequence: s2pu1  
UNITYplus-400 "unity400"  
Date: Jan 6 2020  
Solvent: CDCl3  
Ambient temperature  
Total 32 repetitions

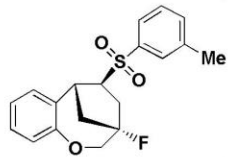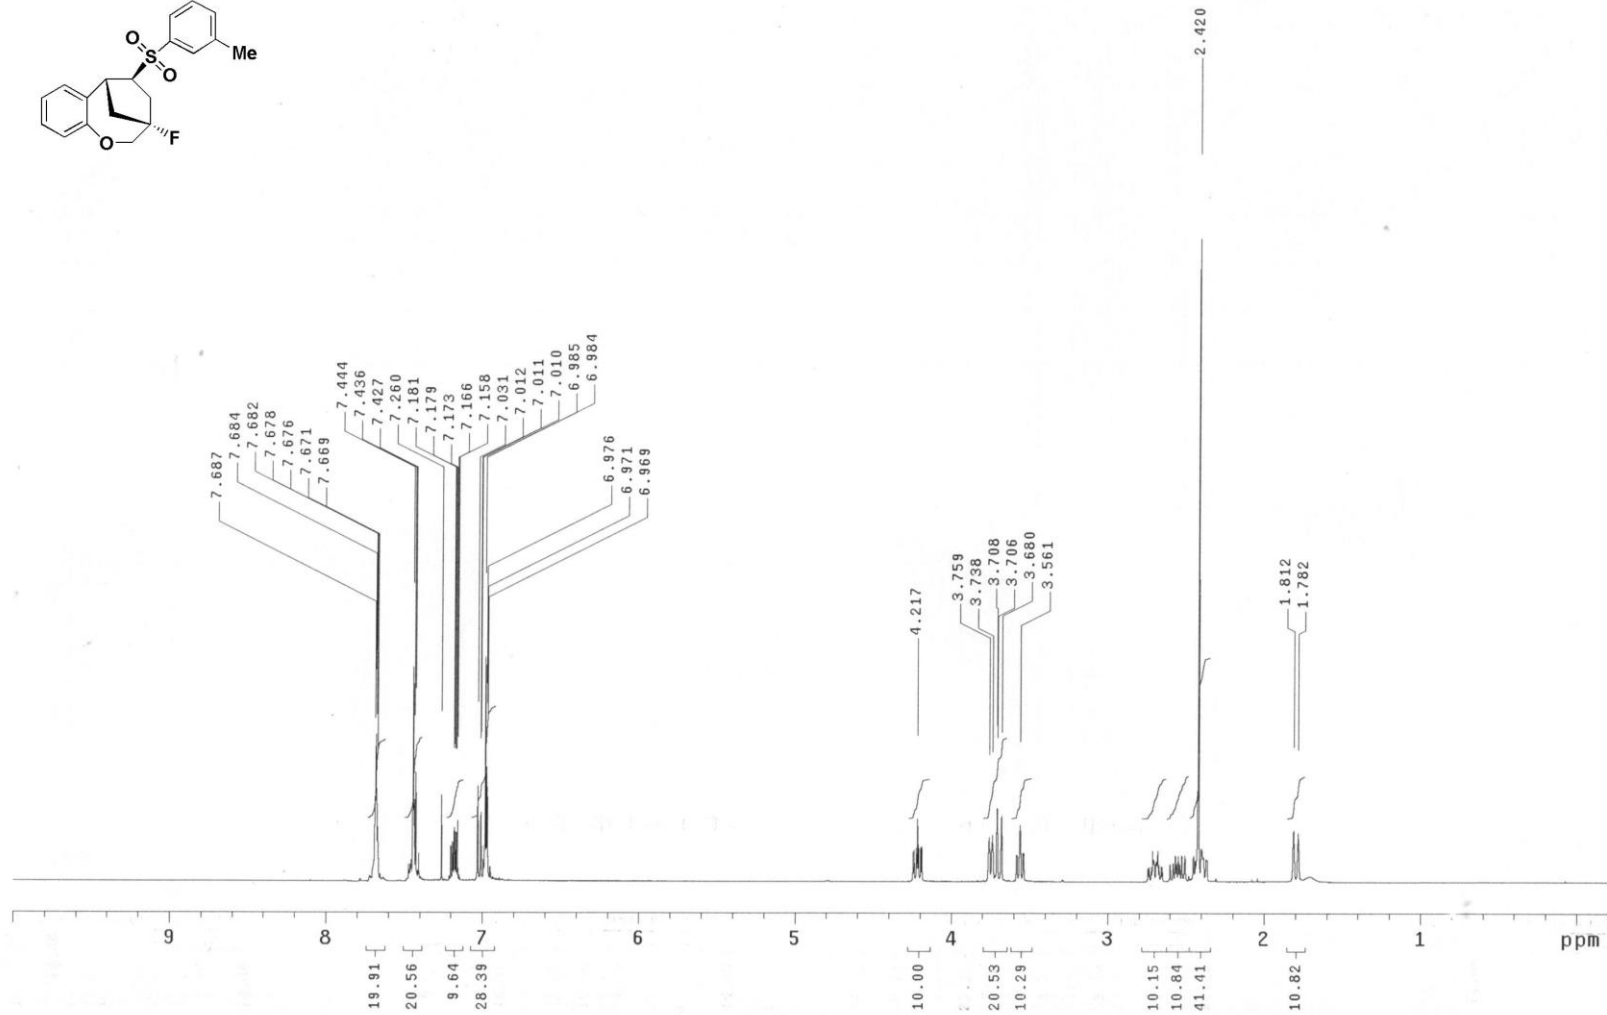

# Compound 5e (<sup>1</sup>H-NMR spectral data-2)

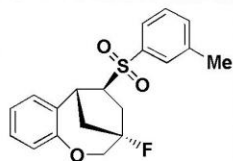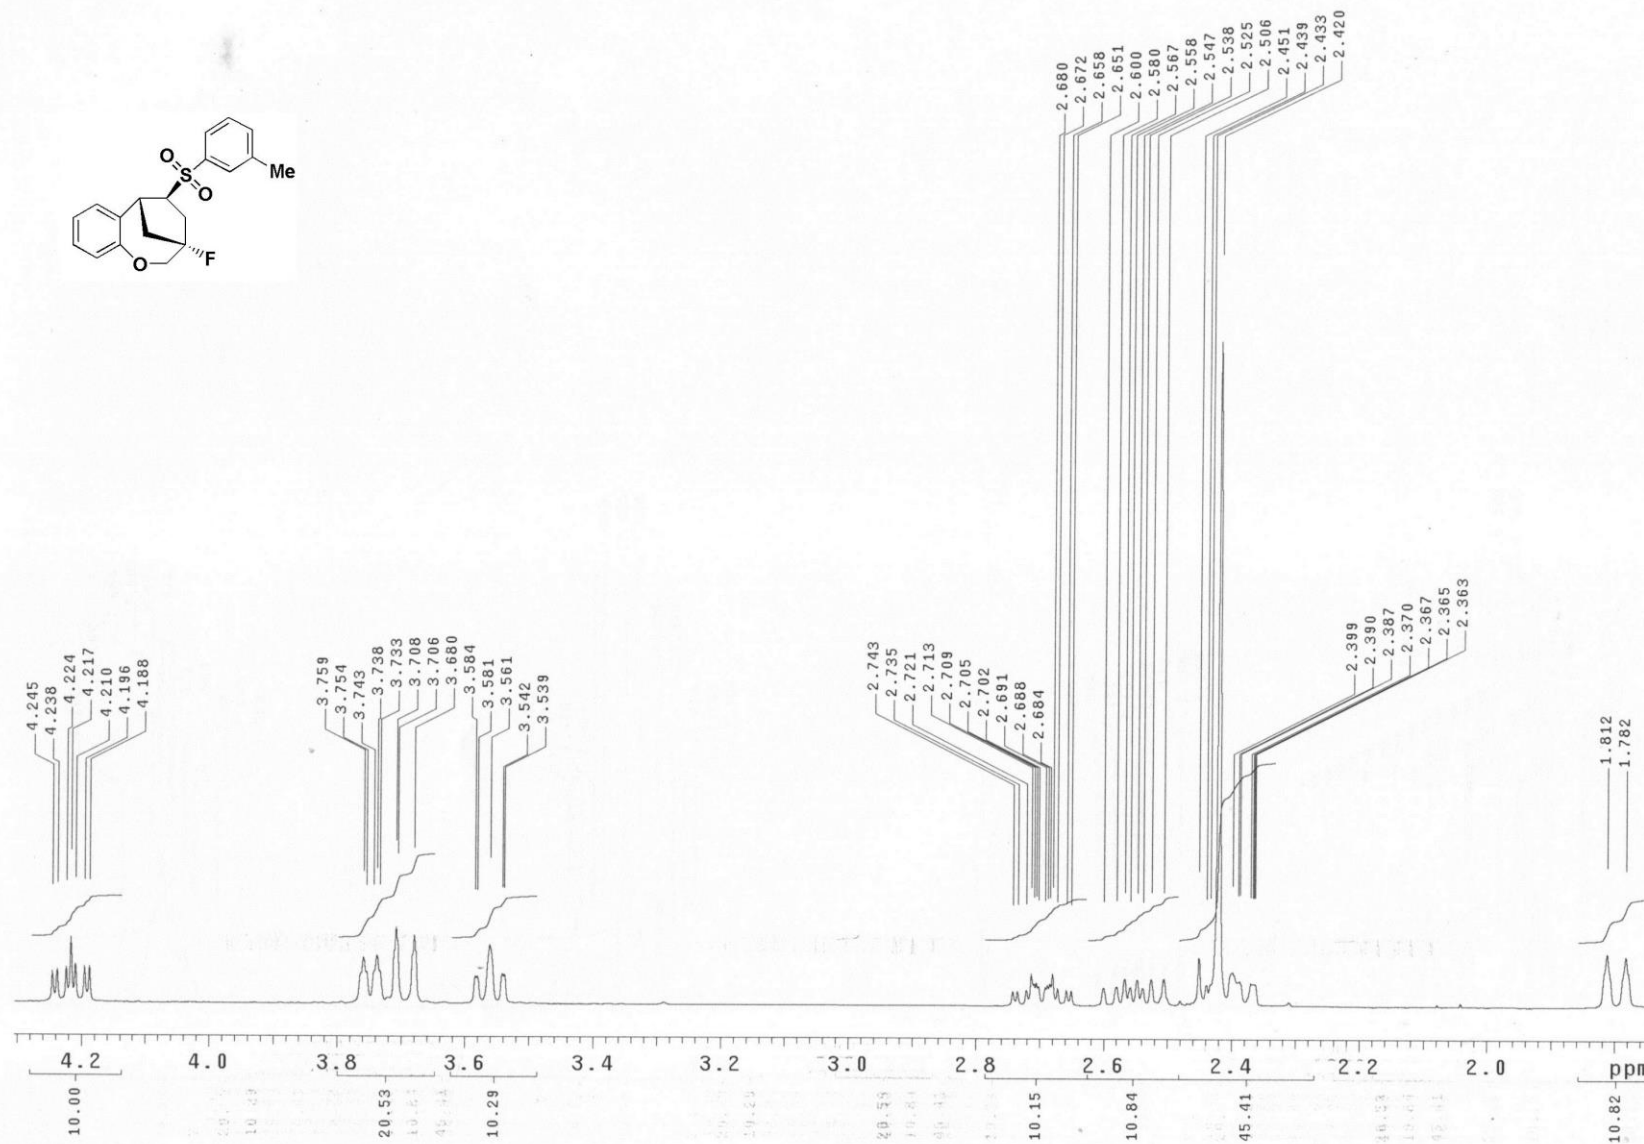

# Compound 5e (<sup>13</sup>C-NMR spectral data)

NC1211NB

Pulse Sequence: s2pu1  
UNITYplus-400 "unity400"  
Date: Jan 6 2020  
Solvent: CDC13  
Ambient temperature  
Total 1424 repetitions

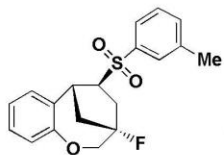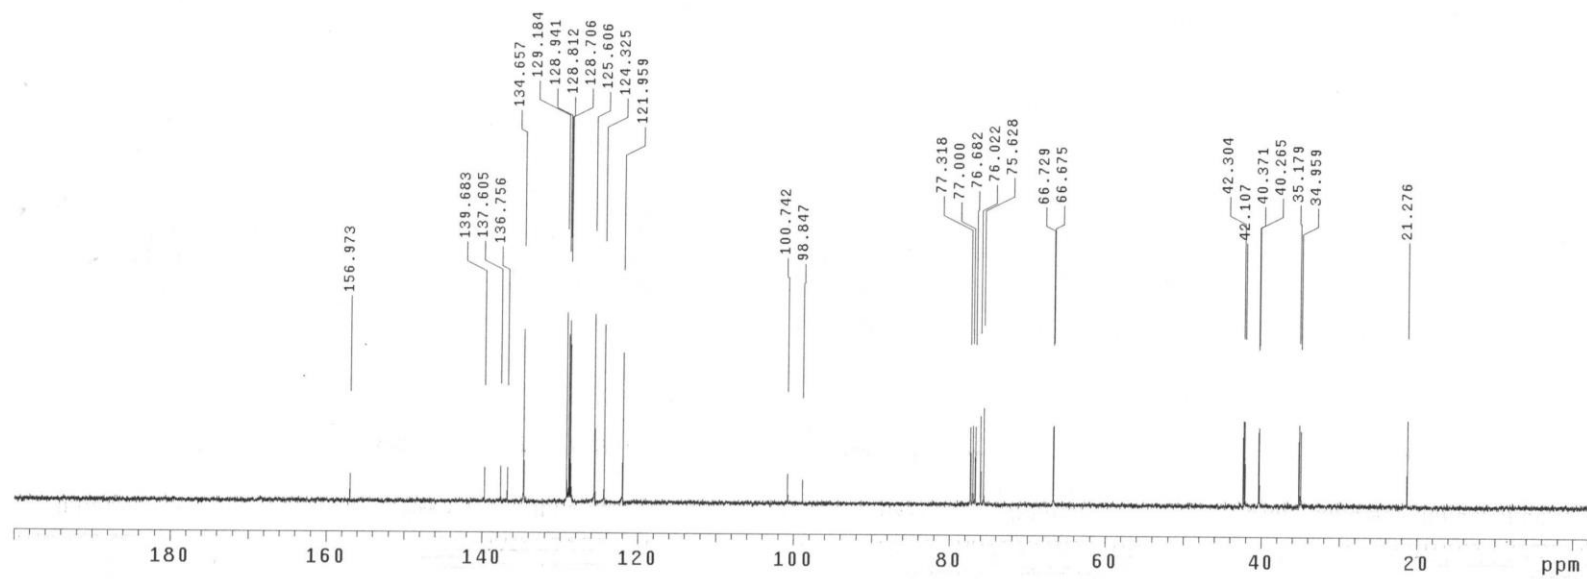

# Compound 5f (<sup>1</sup>H-NMR spectral data)

NC1202BF

Pulse Sequence: s2pu1  
 UNITYplus-400 "unity400"  
 Date: Mar 20 2020  
 Solvent: CDCl<sub>3</sub>  
 Ambient temperature  
 Total 64 repetitions

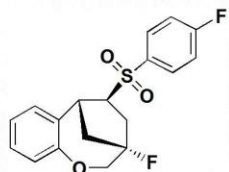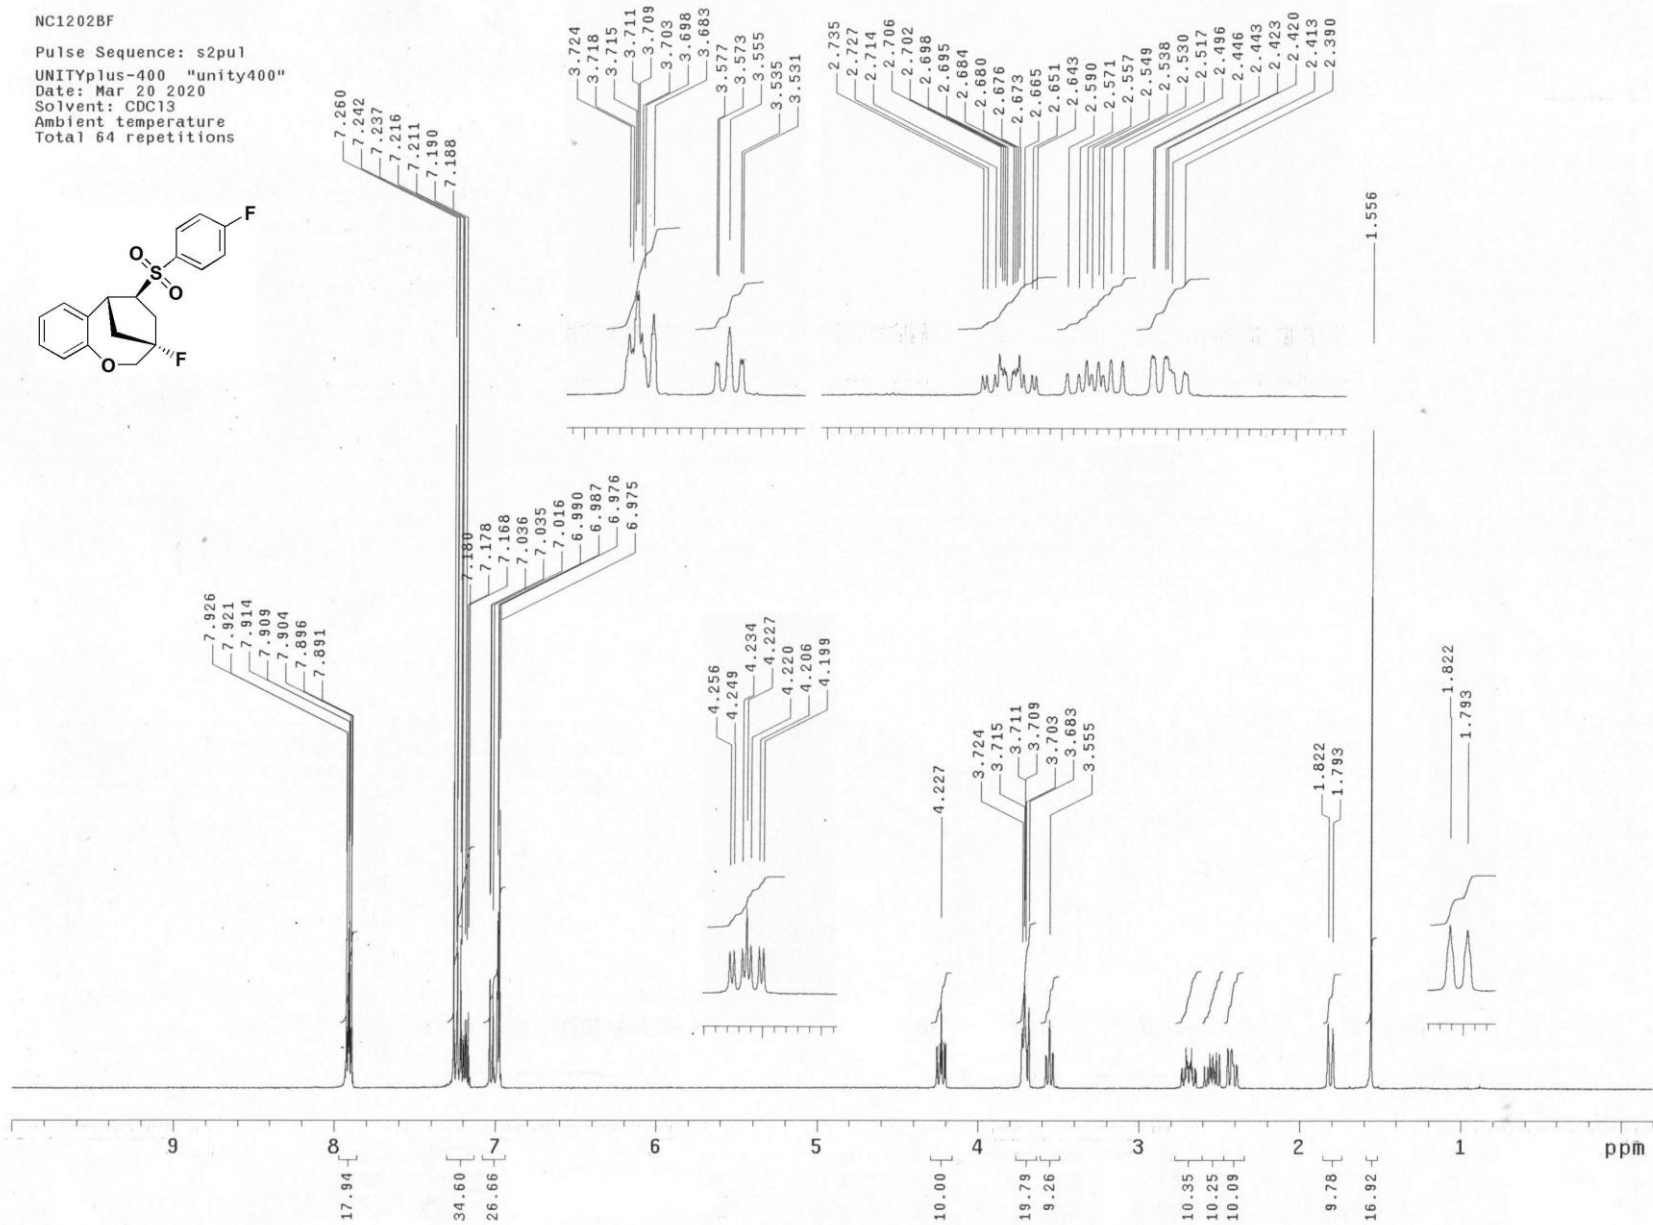

# Compound 5f (<sup>13</sup>C-NMR spectral data)

NC1202BF

Pulse Sequence: s2pu1

UNITYplus-400 "unity400"

Date: Mar 20 2020

Solvent: CDCl<sub>3</sub>

Ambient temperature

Total 13648 repetitions

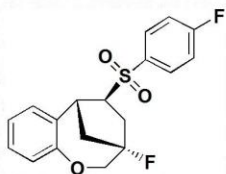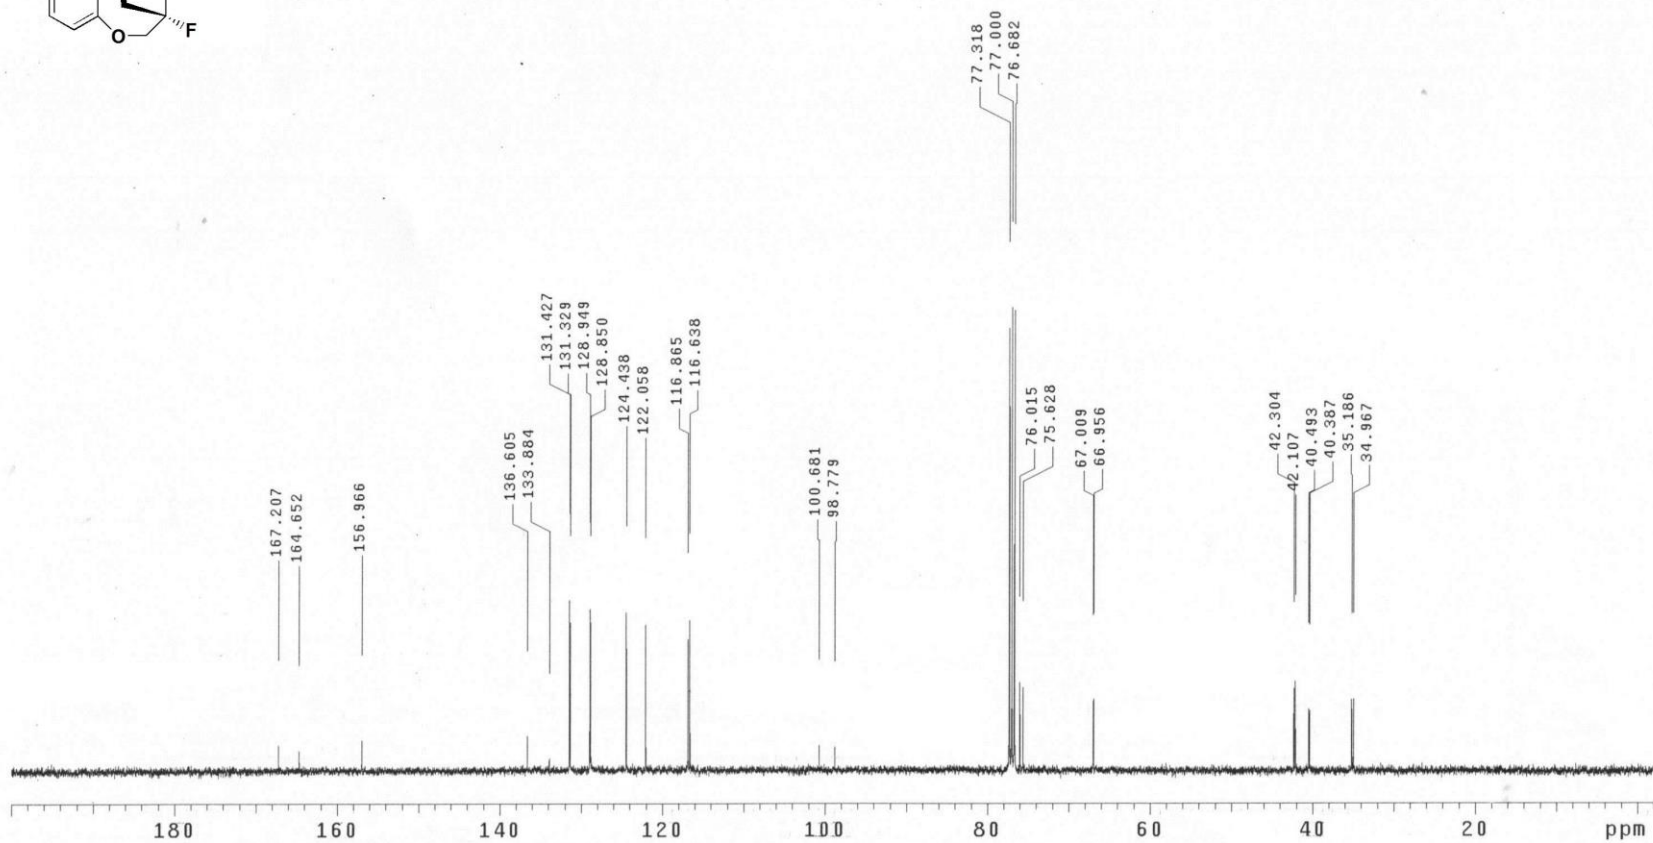

# Compound 5g (<sup>1</sup>H-NMR spectral data)

NC1130NB

Pulse Sequence: s2pu1

UNITYplus-400 "unity400"

Date: Dec 10 2019

Solvent: CDCl<sub>3</sub>

Ambient temperature

Total 32 repetitions

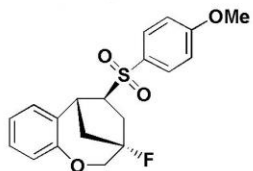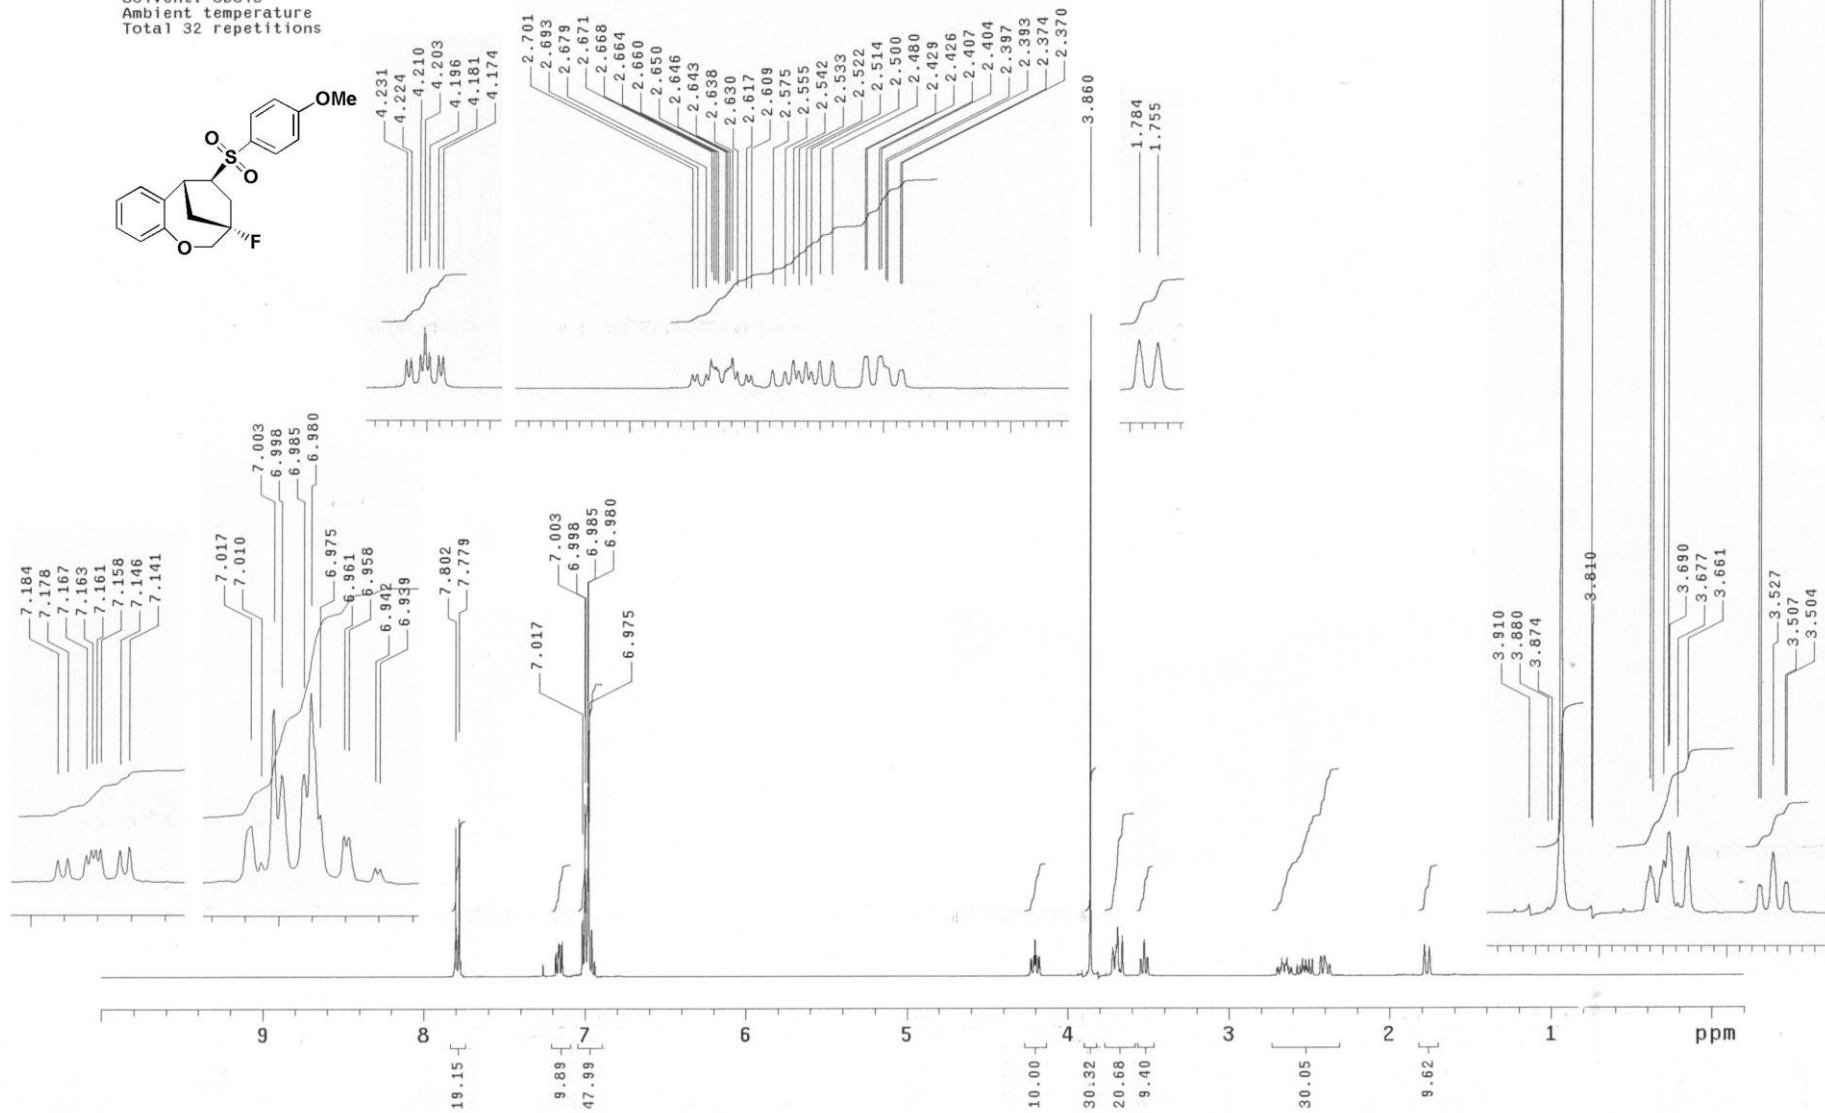



# Compound 5g (<sup>13</sup>C-NMR spectral data)

NC1130NB

Pulse Sequence: s2pu1  
UNITYplus-400 "unity400"  
Date: Dec 10 2019  
Solvent: CDC13  
Ambient temperature  
Total 448 repetitions

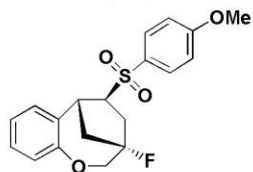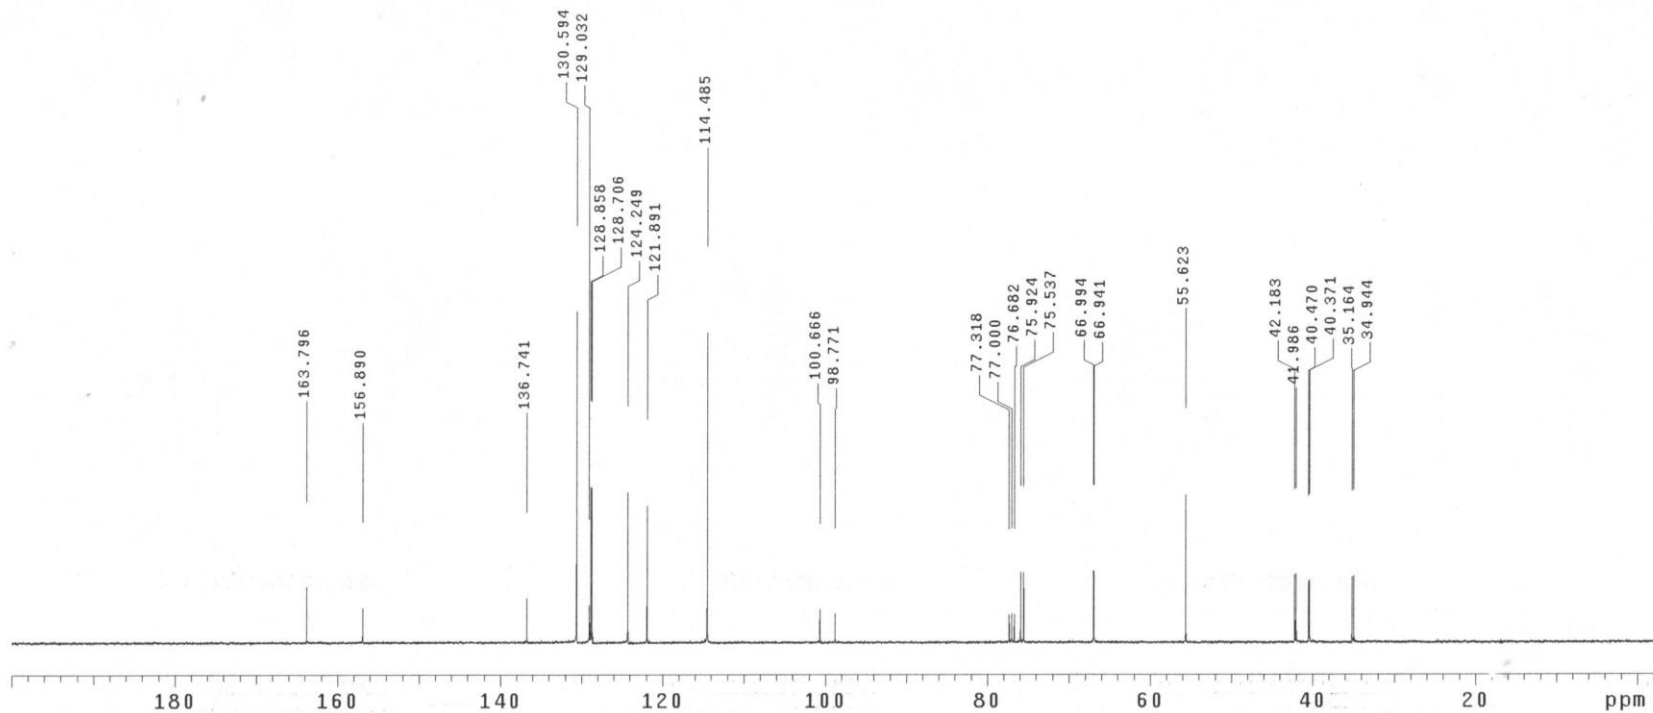

# Compound 5h (<sup>1</sup>H-NMR spectral data)

NC1220NB

Pulse Sequence: s2pu1

UNITYplus-400 "unity400"

Date: Dec 30 2019

Solvent: CDCl<sub>3</sub>

Ambient temperature

Total 32 repetitions

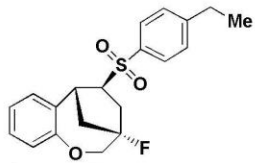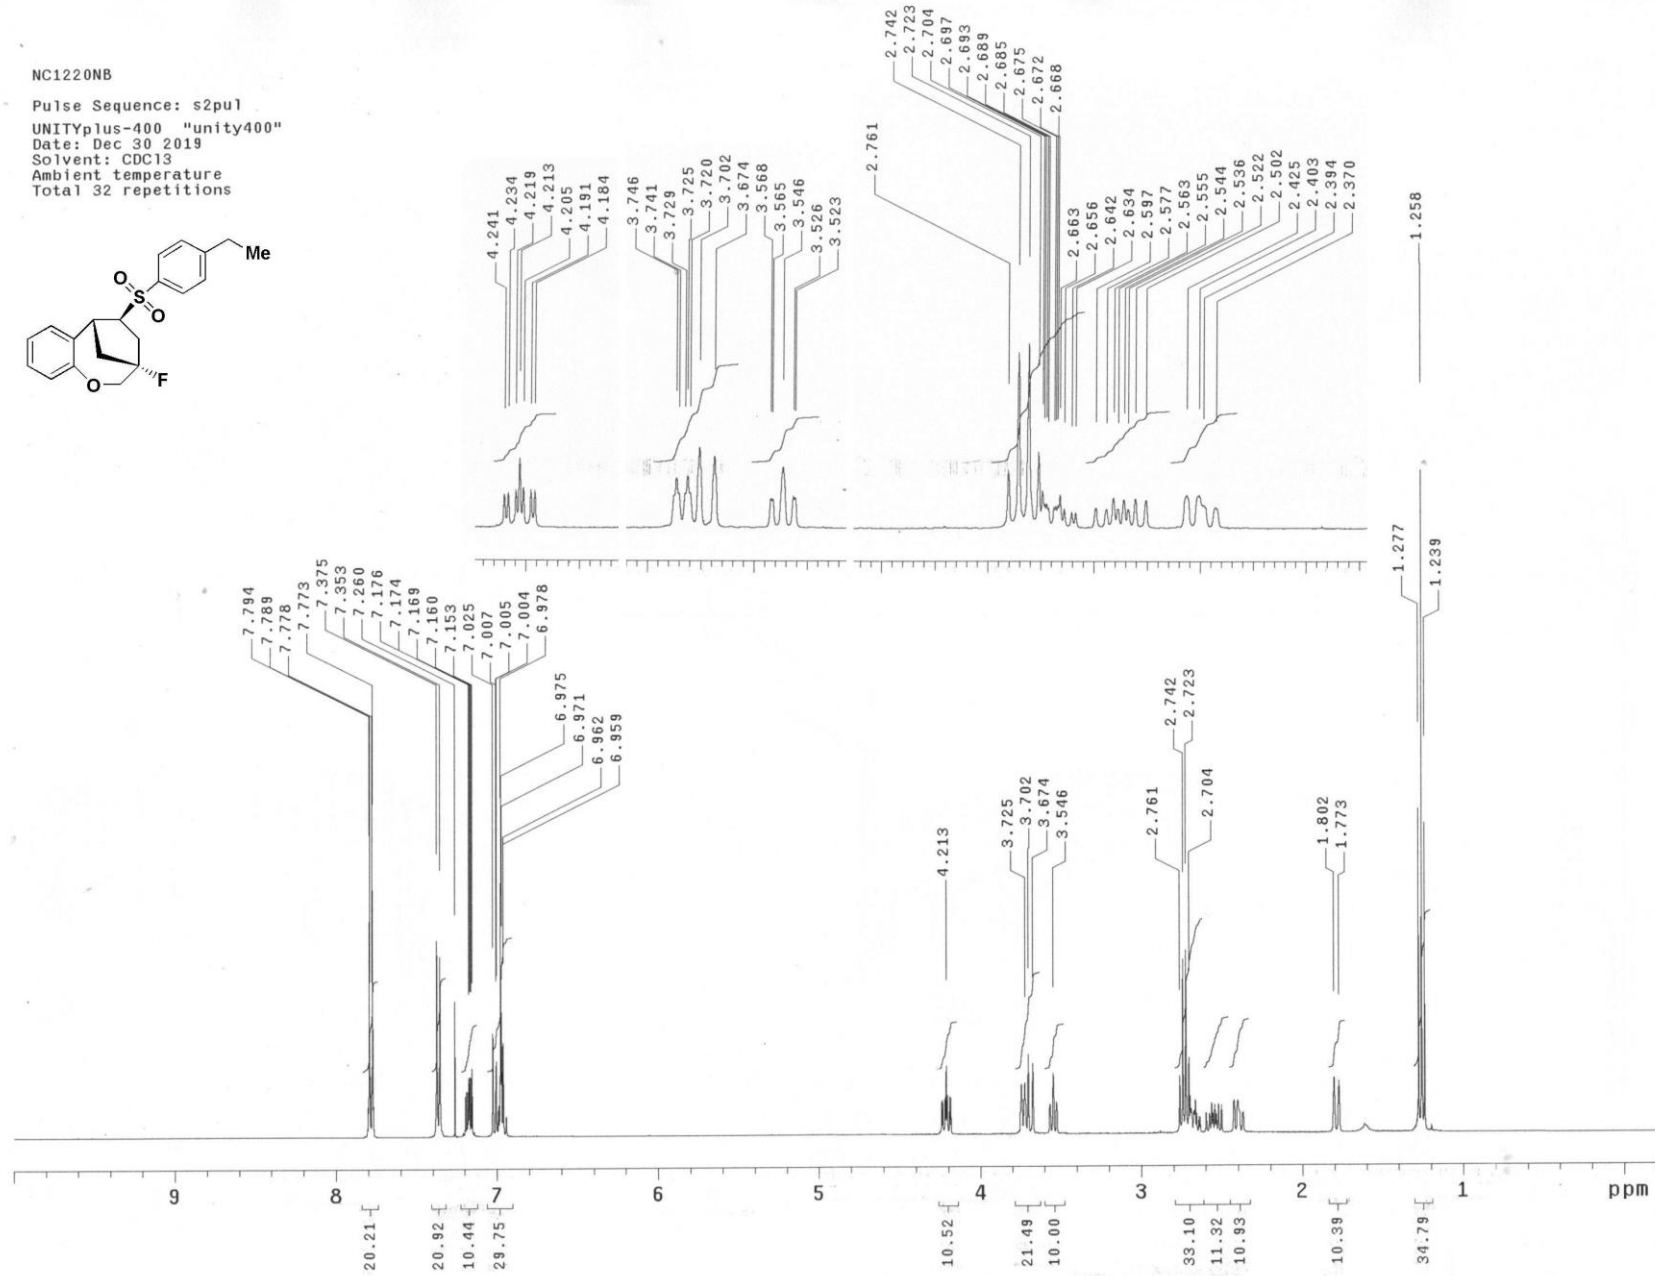

# Compound 5h (<sup>13</sup>C-NMR spectral data)

NC1220NB

Pulse Sequence: s2pu1

UNITYplus-400 "unity400"

Date: Dec 30 2019

Solvent: CDCl<sub>3</sub>

Ambient temperature

Total 1632 repetitions

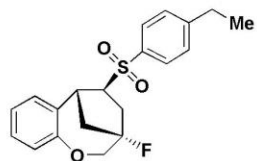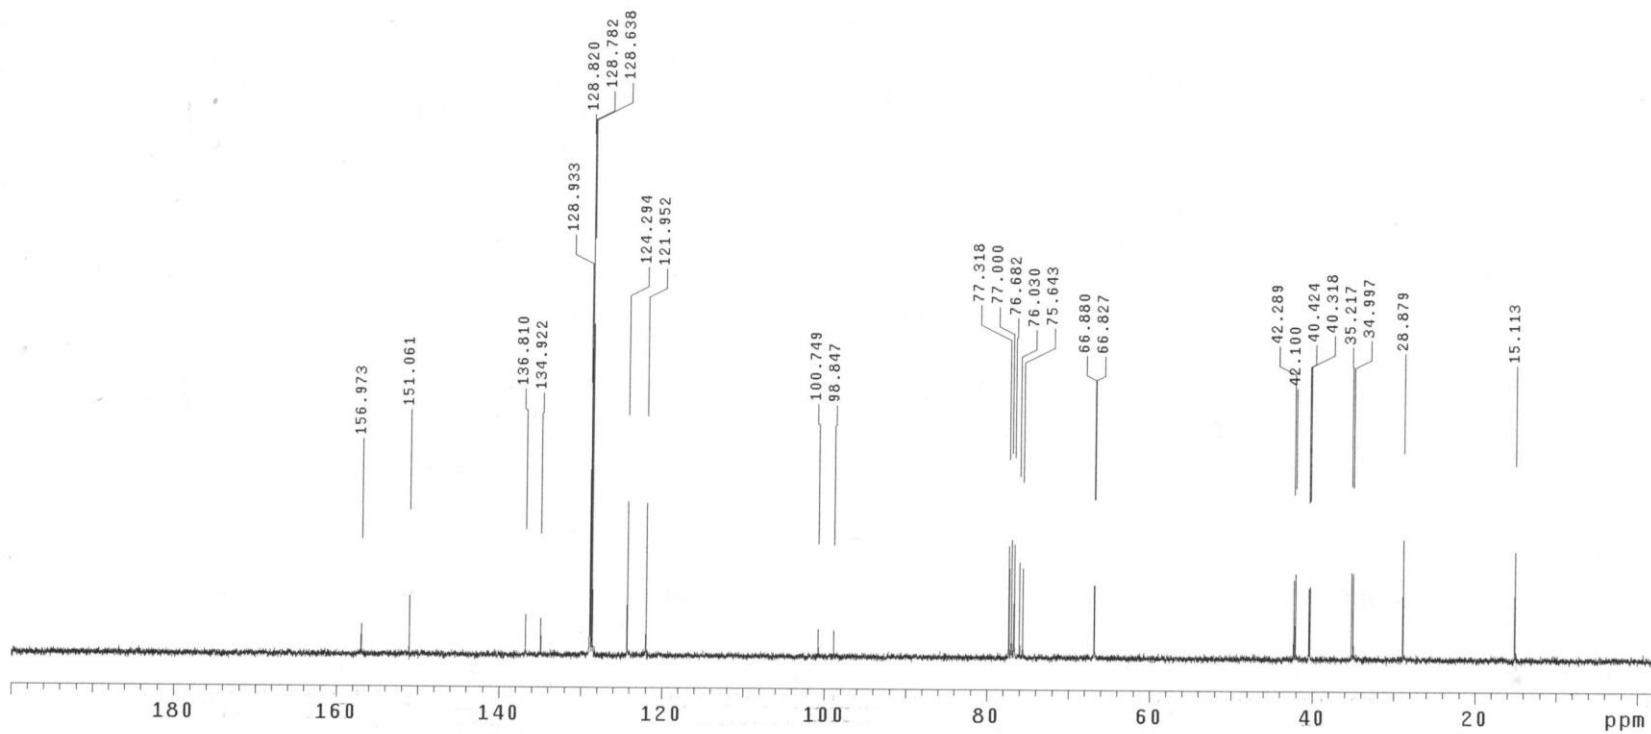

# Compound 5i (<sup>1</sup>H-NMR spectral data)

931729

NC1210NB

Pulse Sequence: s2pu1

UNITYplus-400 "unity400"

Date: Dec 20 2019

Solvent: CDCl<sub>3</sub>

Ambient temperature

Total 32 repetitions

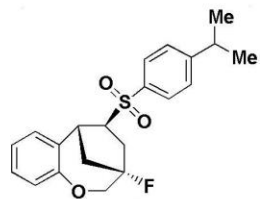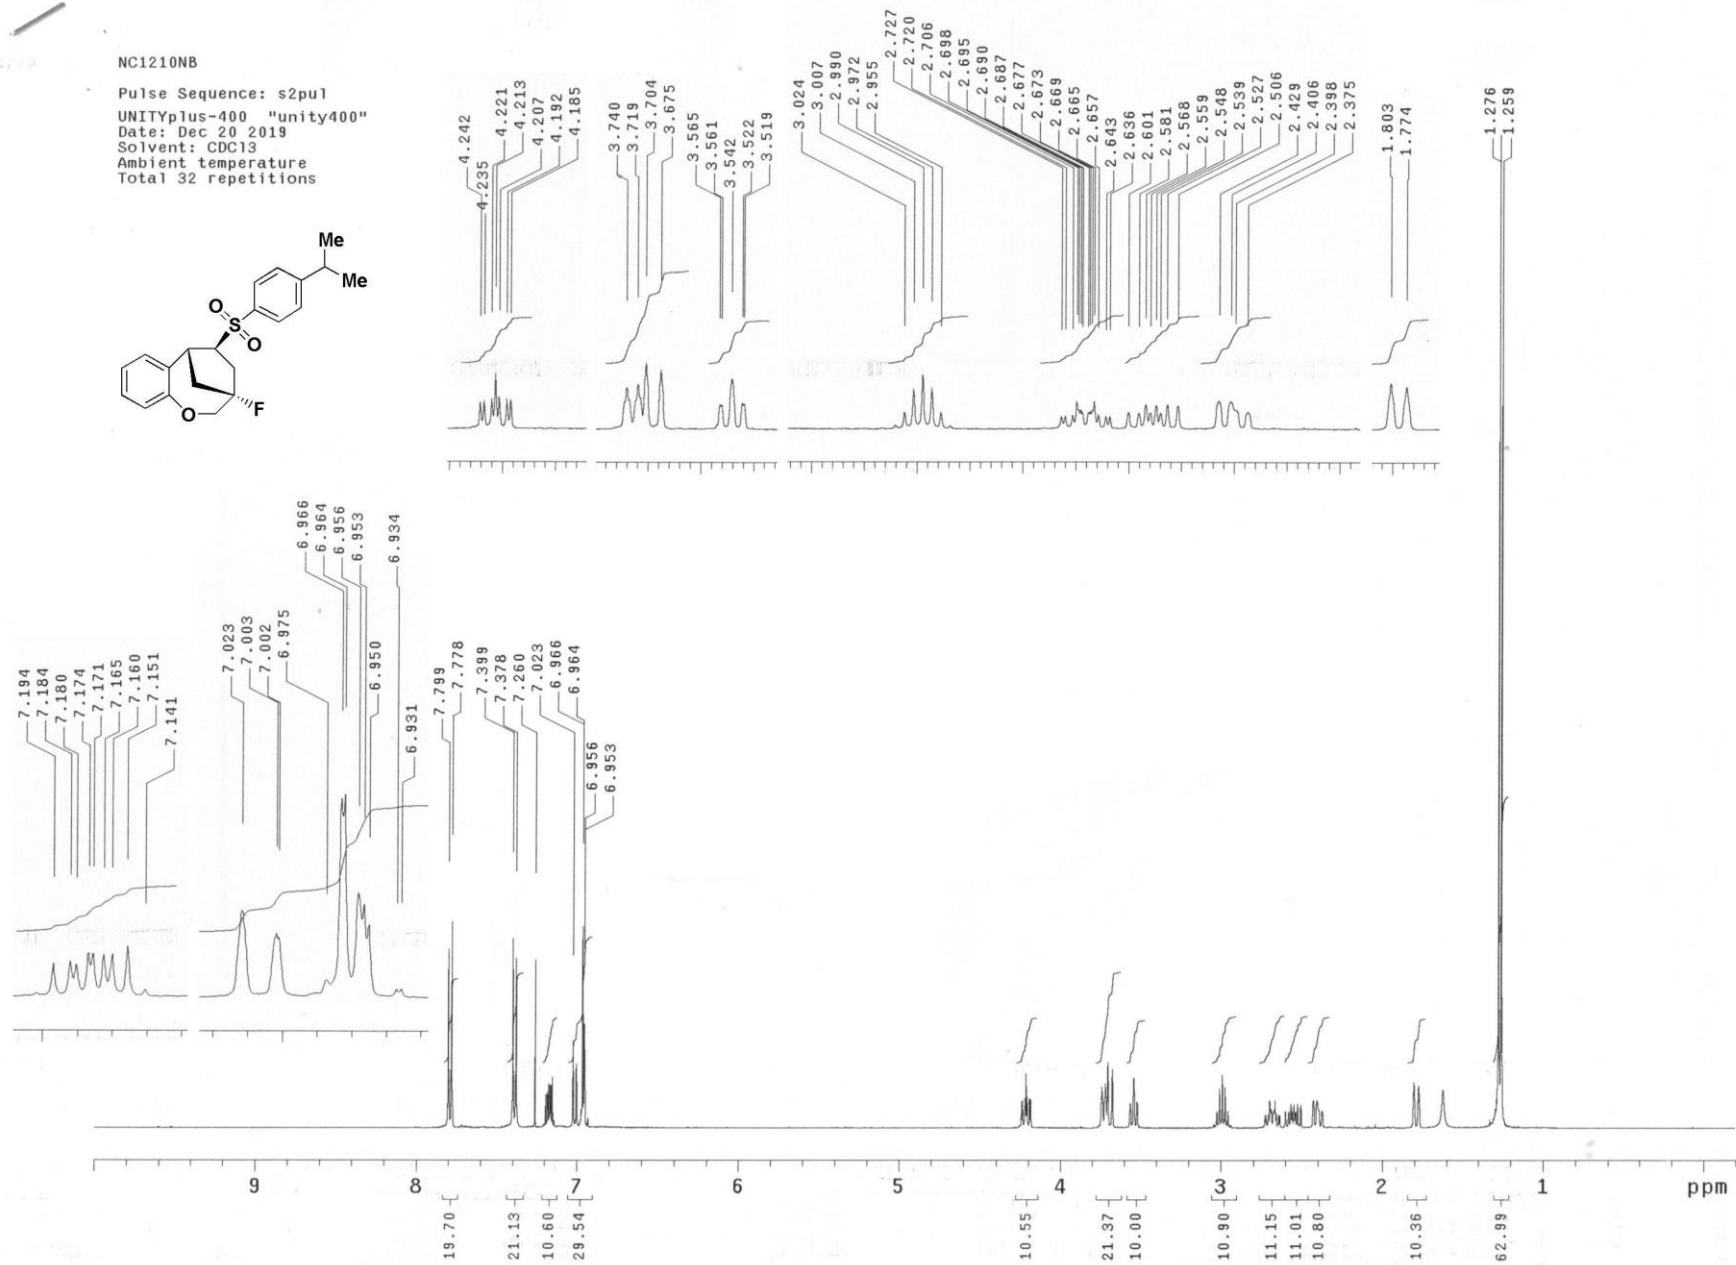

# Compound 5i (<sup>13</sup>C-NMR spectral data)

NC1210NB

Pulse Sequence: s2pu1  
UNITYplus-400 "unity400"  
Date: Dec 20 2019  
Solvent: CDCl<sub>3</sub>  
Ambient temperature  
Total 2400 repetitions

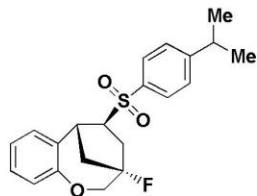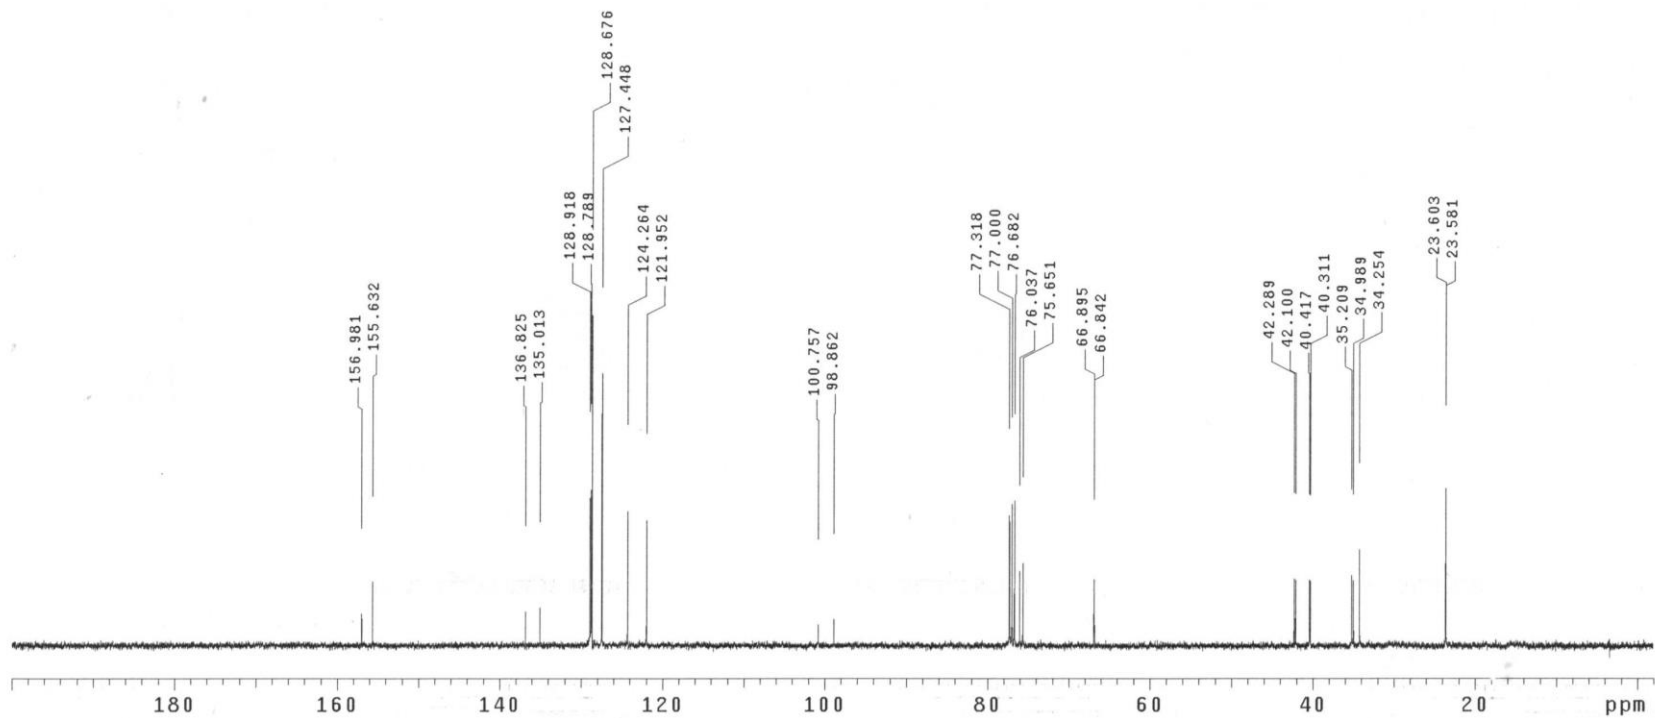

# Compound 5j (<sup>1</sup>H-NMR spectral data)

NC1216NB

Pulse Sequence: s2pu1

UNITYplus-400 "unity400"

Date: Dec 27 2019

Solvent: CDCl<sub>3</sub>

Ambient temperature

Total 32 repetitions

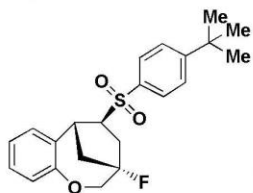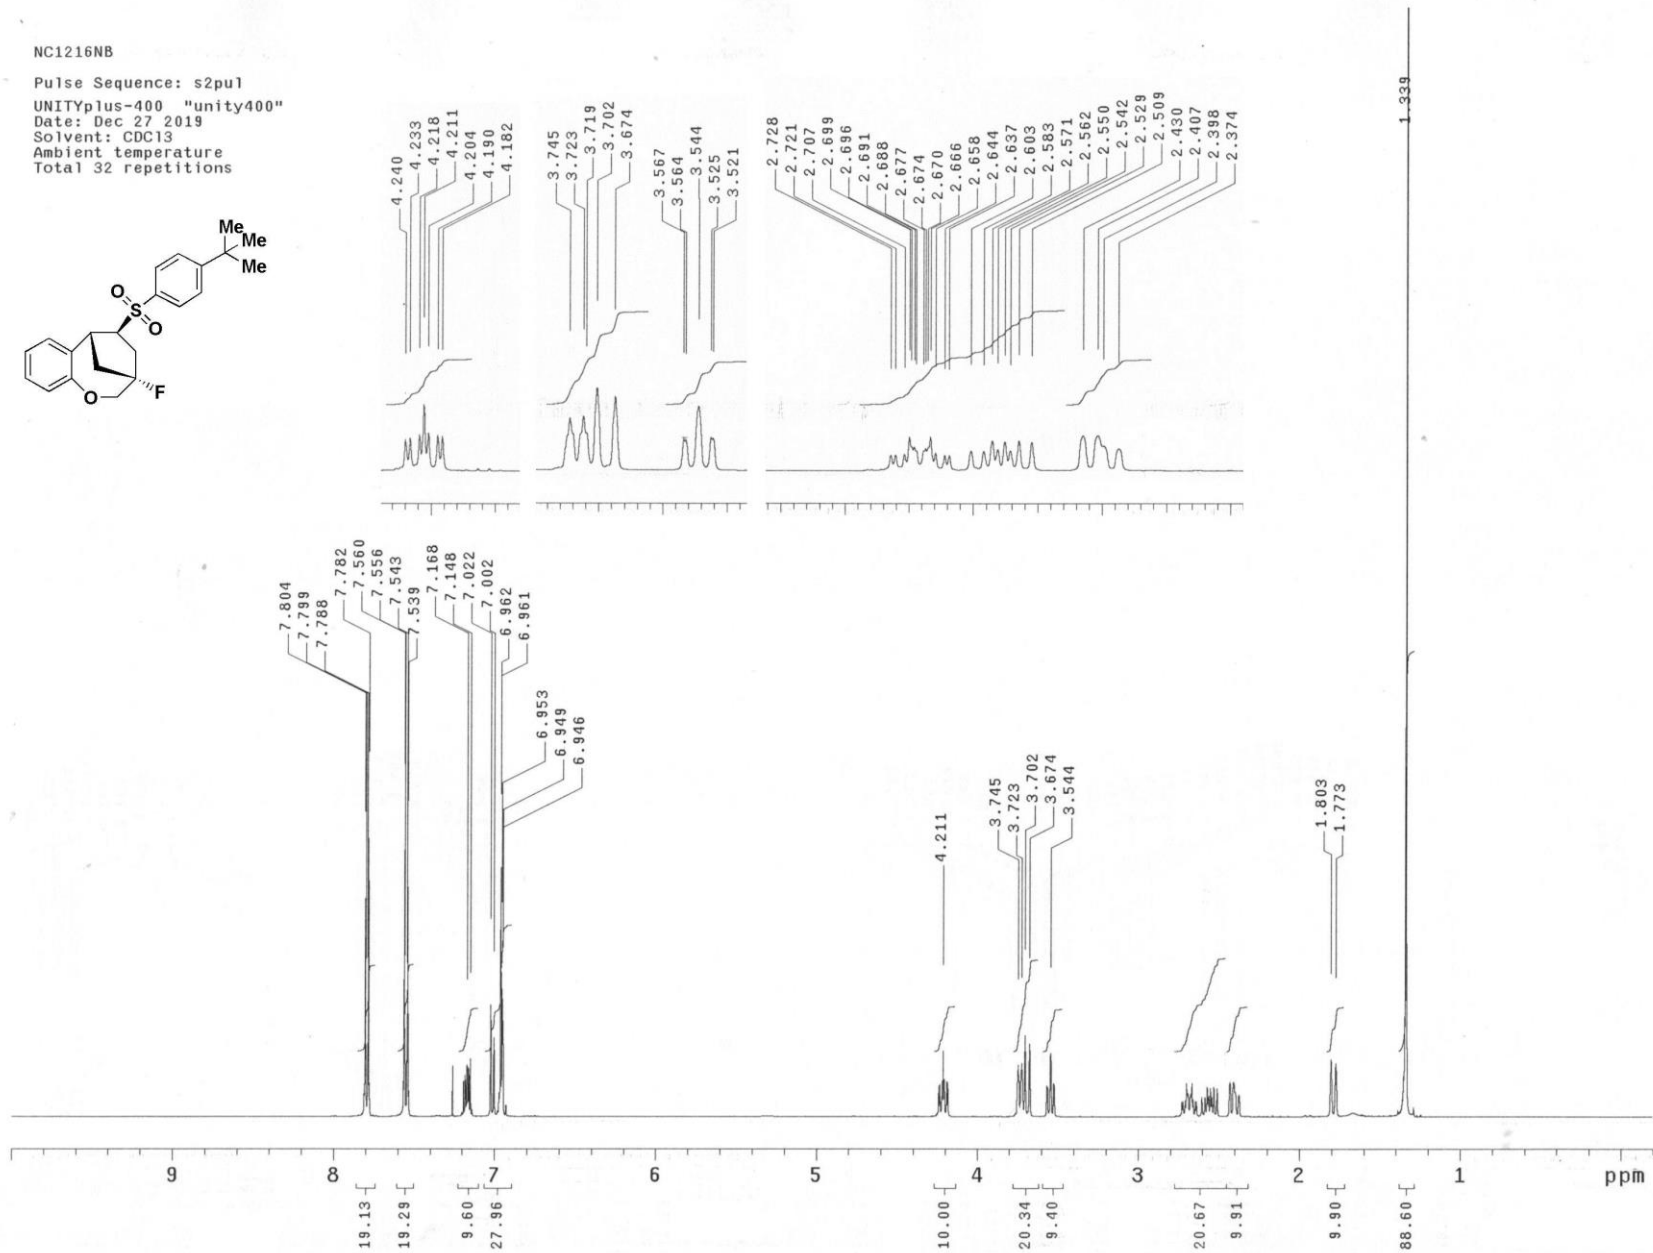

# Compound 5j (<sup>13</sup>C-NMR spectral data)

NC1216NB

Pulse Sequence: s2pu1

UNITYplus-400 "unity400"

Date: Dec 27 2019

Solvent: CDCl<sub>3</sub>

Ambient temperature

Total 800 repetitions

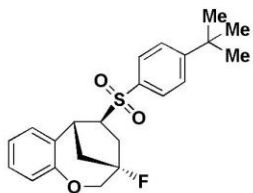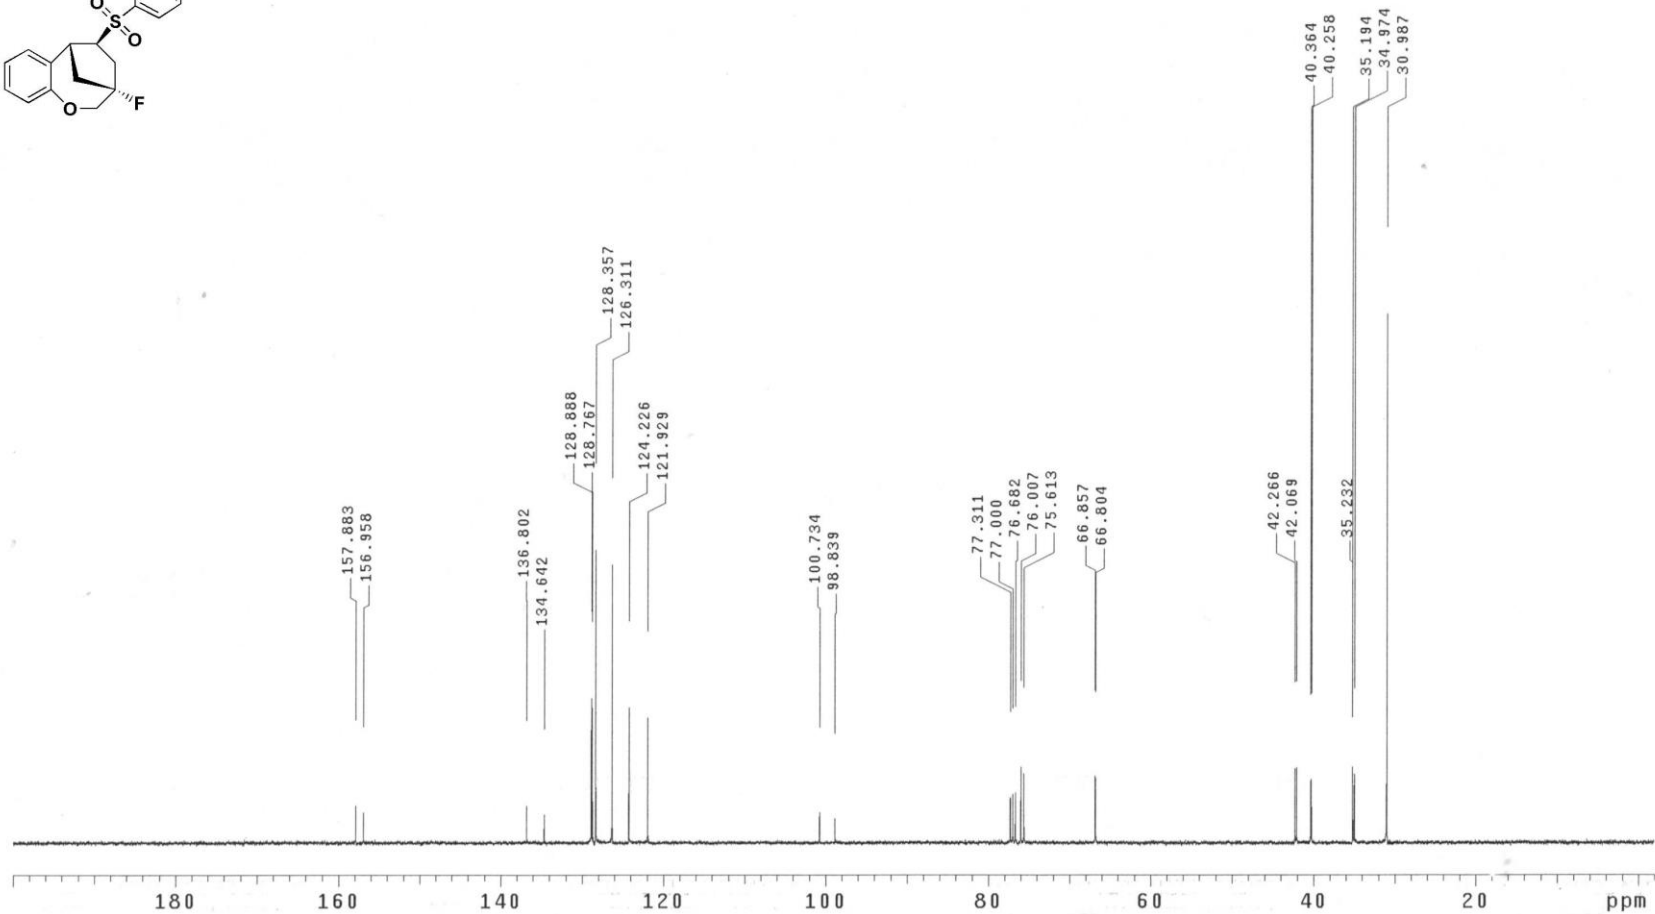

# Compound 5k (<sup>1</sup>H-NMR spectral data)

NC1212NB

Pulse Sequence: s2pu1

UNITYplus-400 "unity400"

Date: Dec 24 2019

Solvent: CDC13

Ambient temperature

Total 32 repetitions

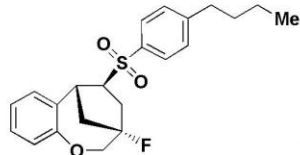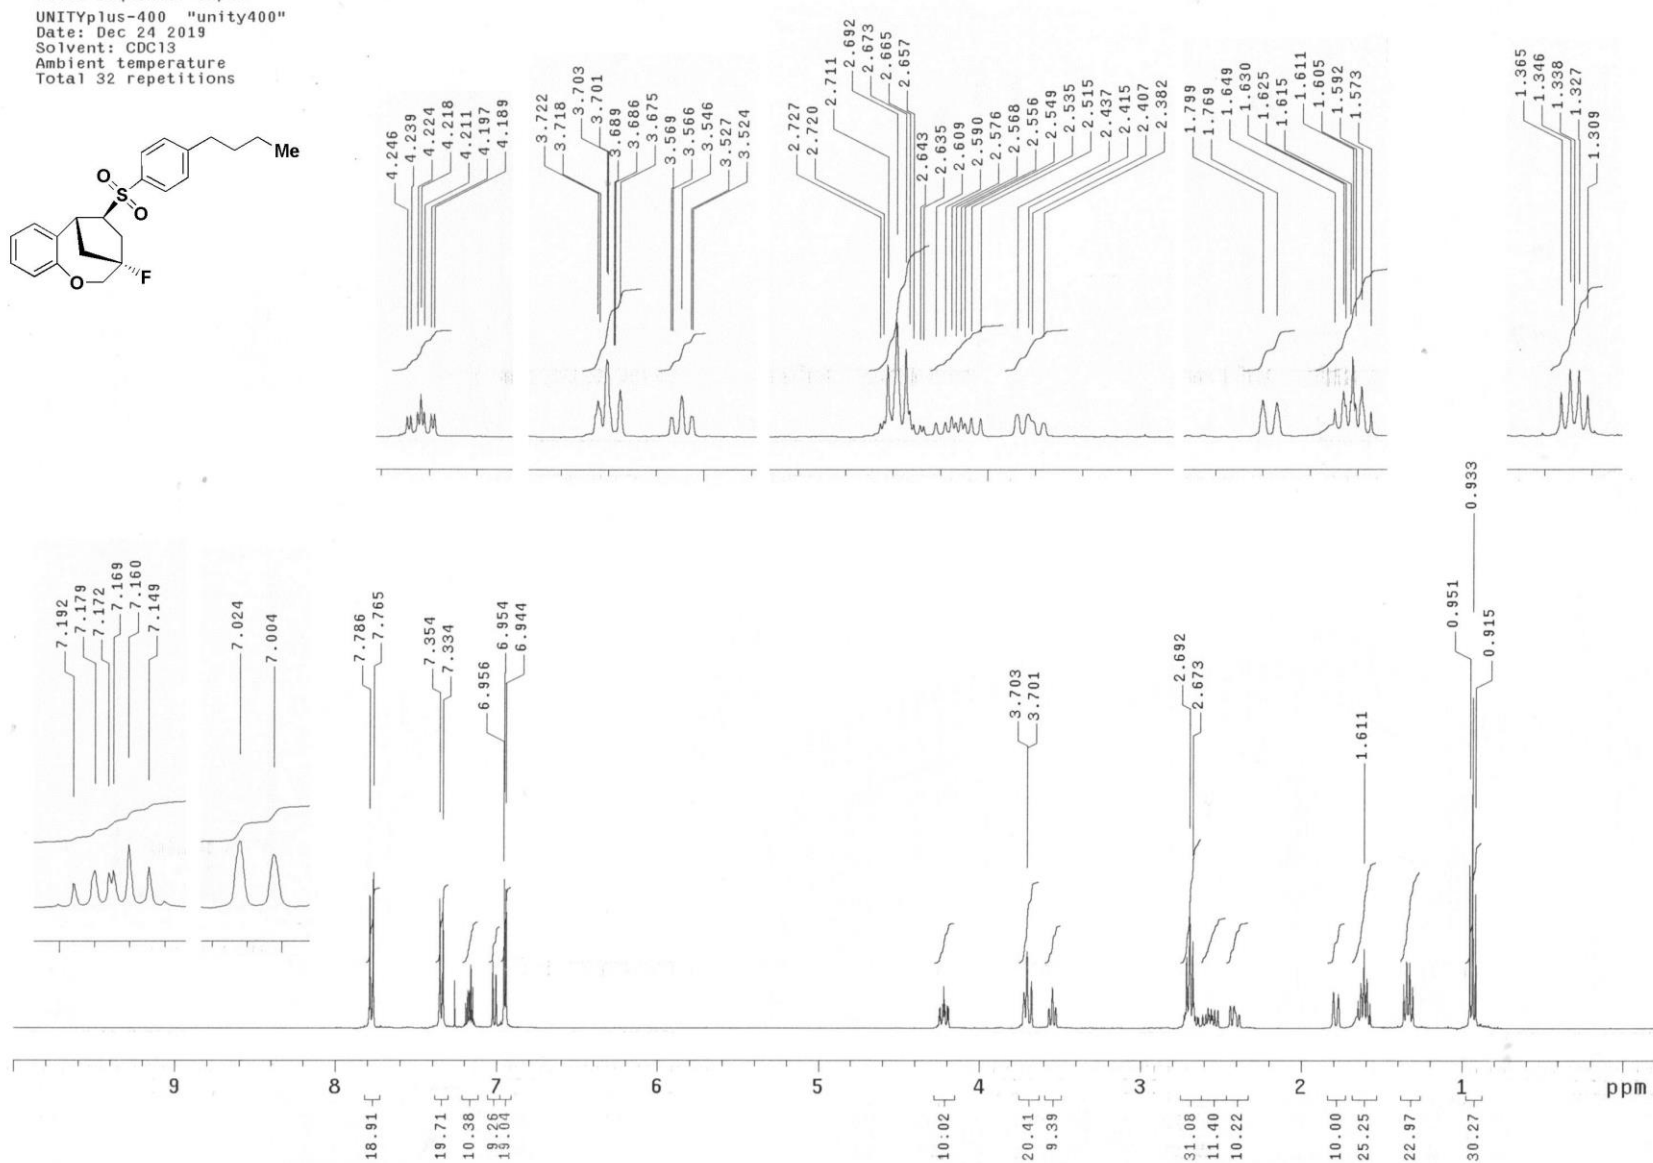



# Compound 5k (<sup>13</sup>C-NMR spectral data)

NC1212NB

Pulse Sequence: s2pu1

UNITYplus-400 "unity400"

Date: Dec 24 2019

Solvent: CDC13

Ambient temperature

Total 1152 repetitions

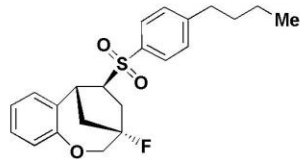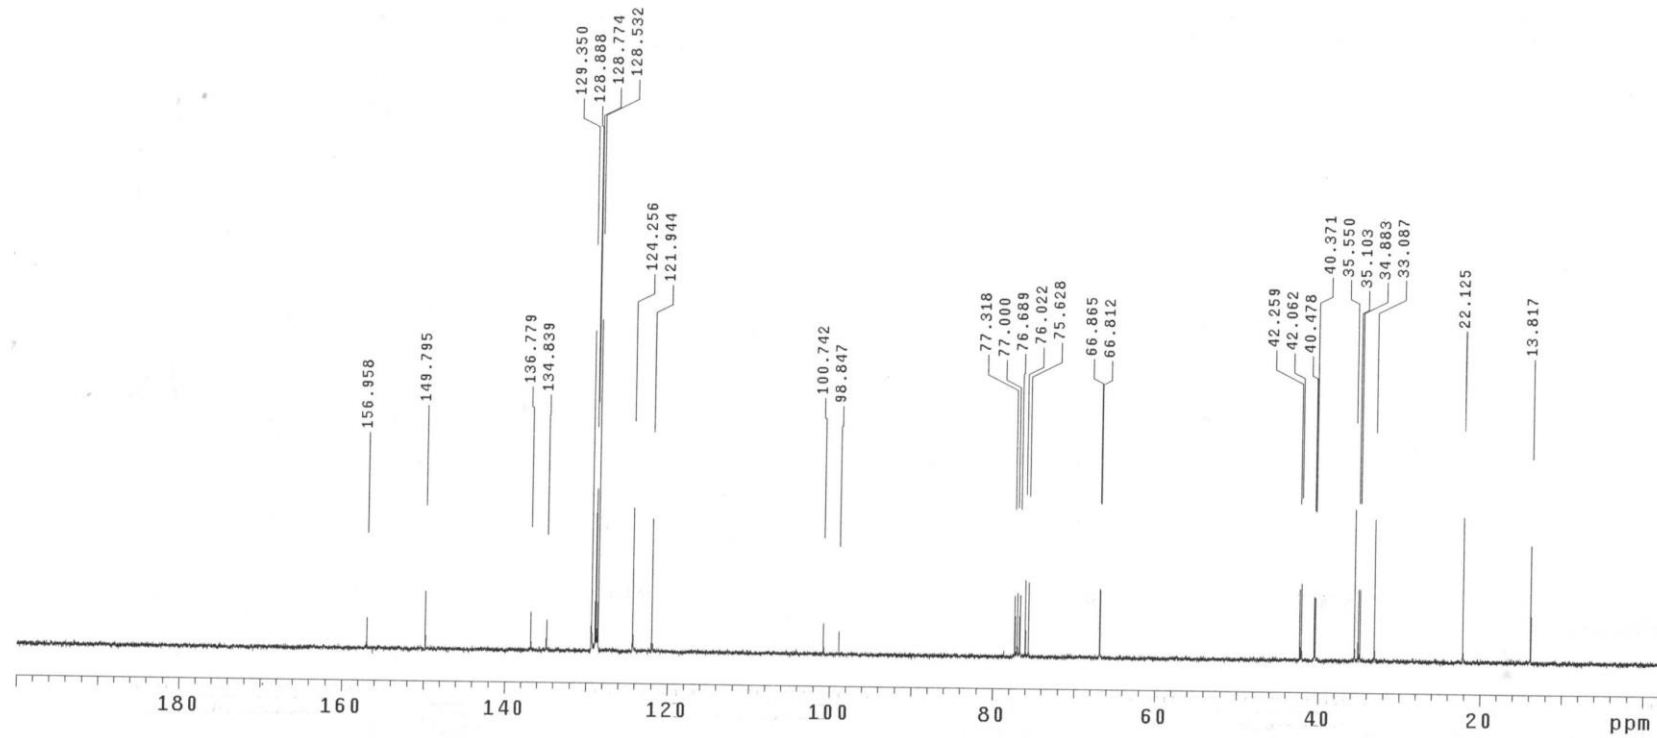

# Compound 5I (<sup>1</sup>H-NMR spectral data-1)

NC1204NB

Pulse Sequence: s2pu1

UNITYplus-400 "unity400"

Date: Dec 23 2019

Solvent: CDCl<sub>3</sub>

Ambient temperature

Total 32 repetitions

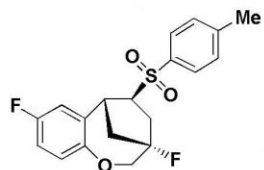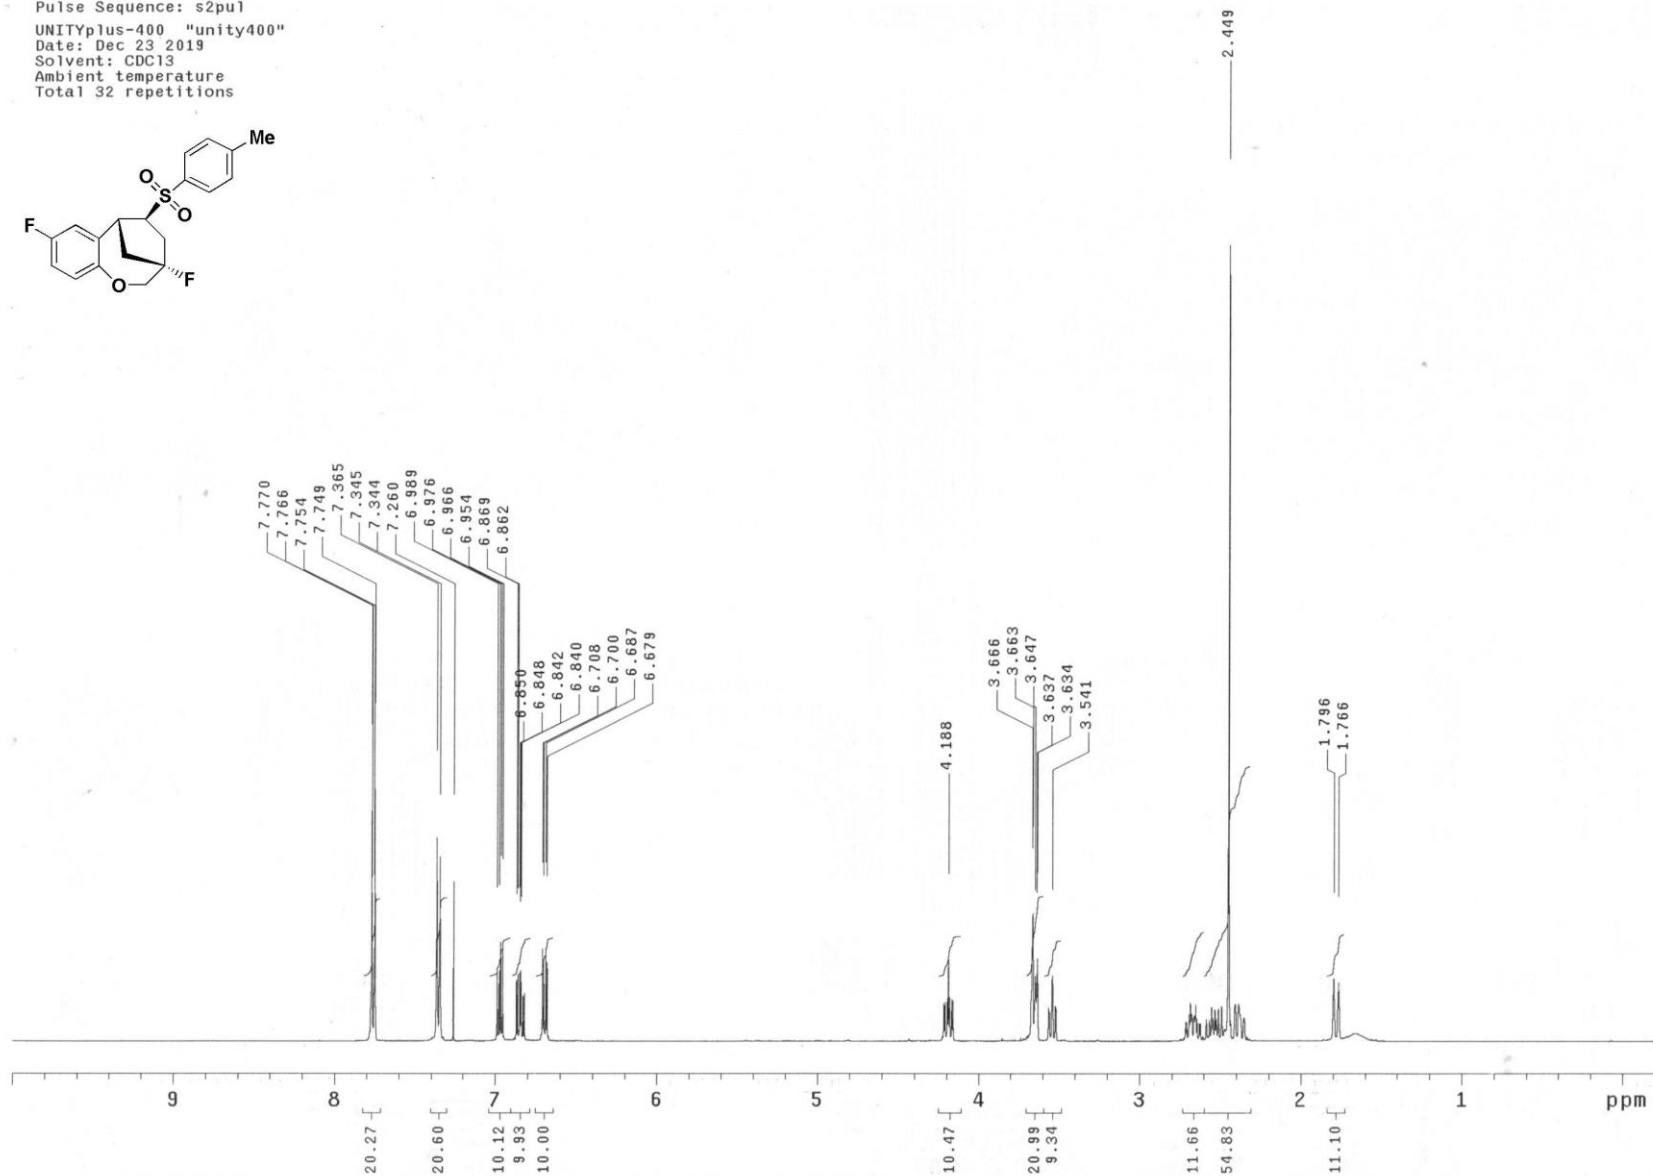

# Compound 5l (<sup>1</sup>H-NMR spectral data-2)

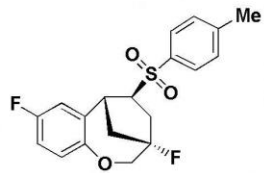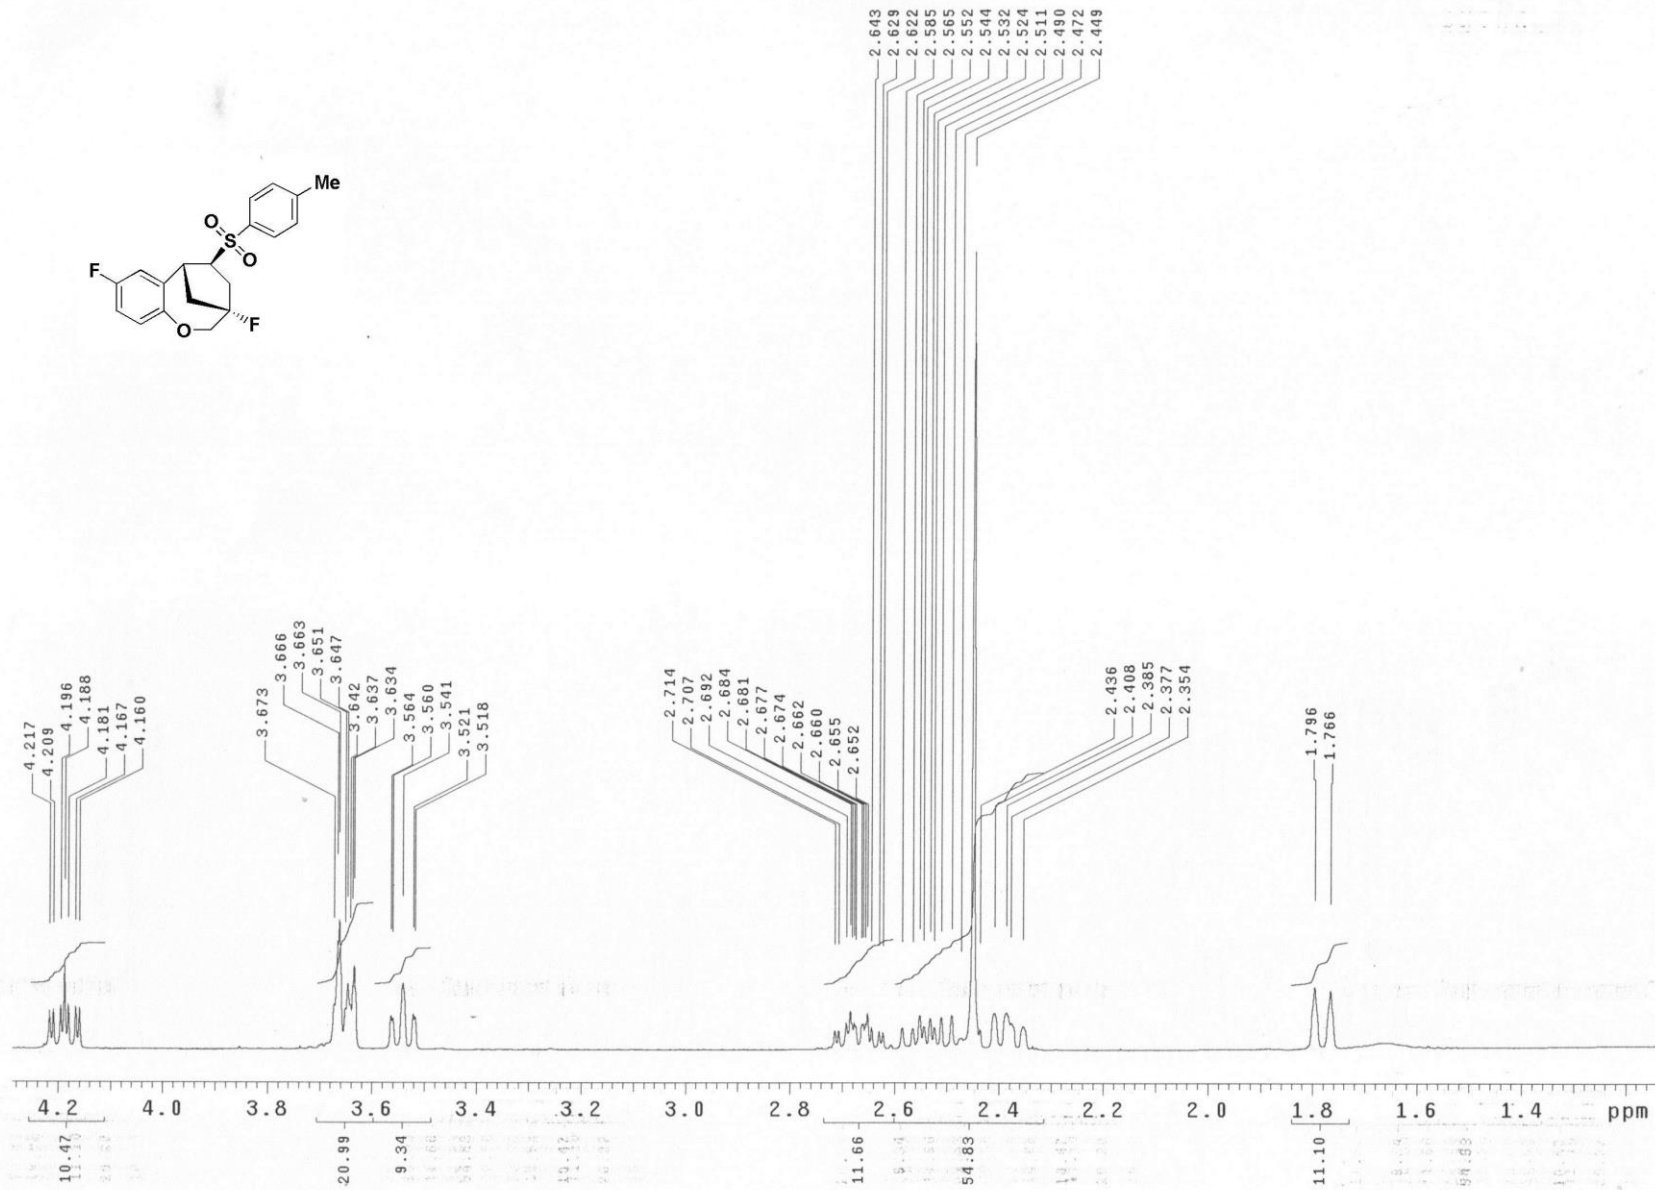

# Compound 5I (<sup>13</sup>C-NMR spectral data)

NC1204NB

Pulse Sequence: s2pu1

UNITYplus-400 "unity400"

Date: Dec 23 2019

Solvent: CDC13

Ambient temperature

Total 2688 repetitions

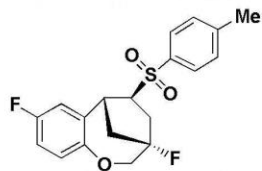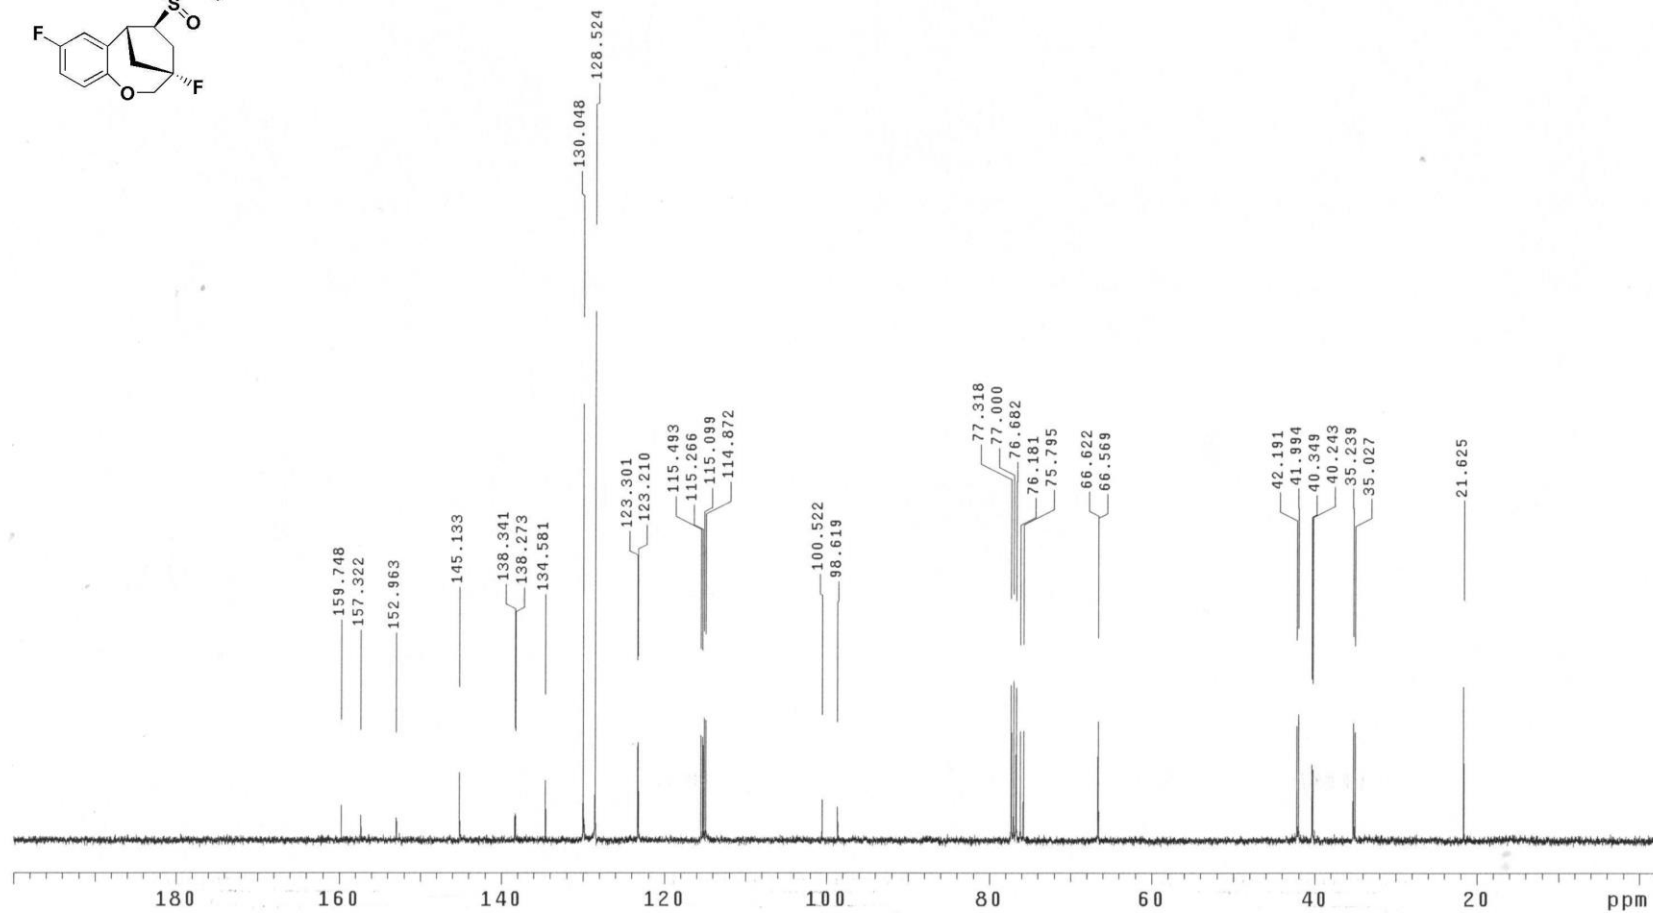

# Compound 5m (<sup>1</sup>H-NMR spectral data)

NC0115NB

Pulse Sequence: s2pu1

UNITYplus-400 "unity400"

Date: Feb 14 2020

Solvent: CDC13

Ambient temperature

Total 32 repetitions

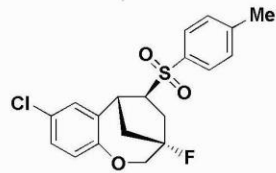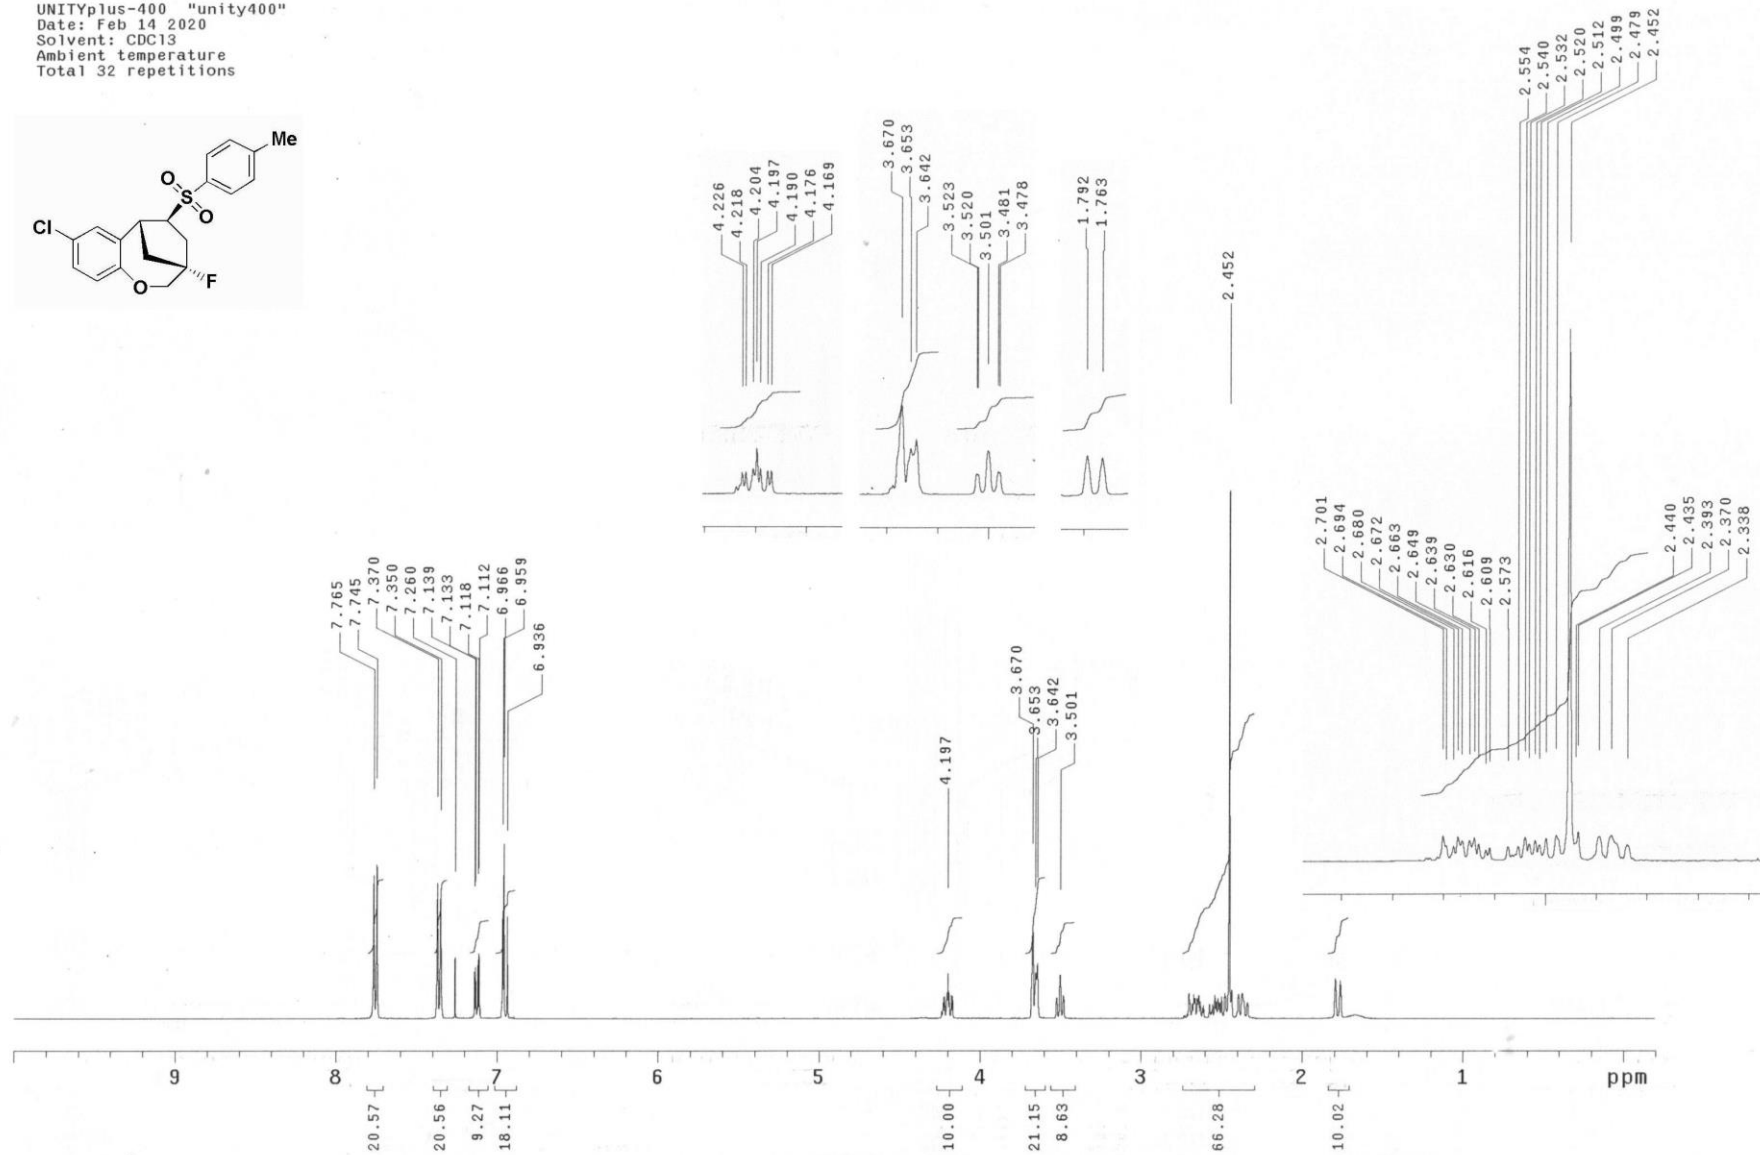

# Compound 5m (<sup>13</sup>C-NMR spectral data)

NC0115NB

Pulse Sequence: s2pu1

UNITYplus-400 "unity400"

Date: Feb 14 2020

Solvent: CDCl<sub>3</sub>

Ambient temperature

Total 1136 repetitions

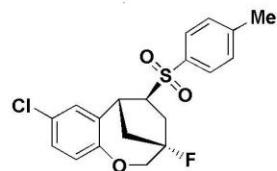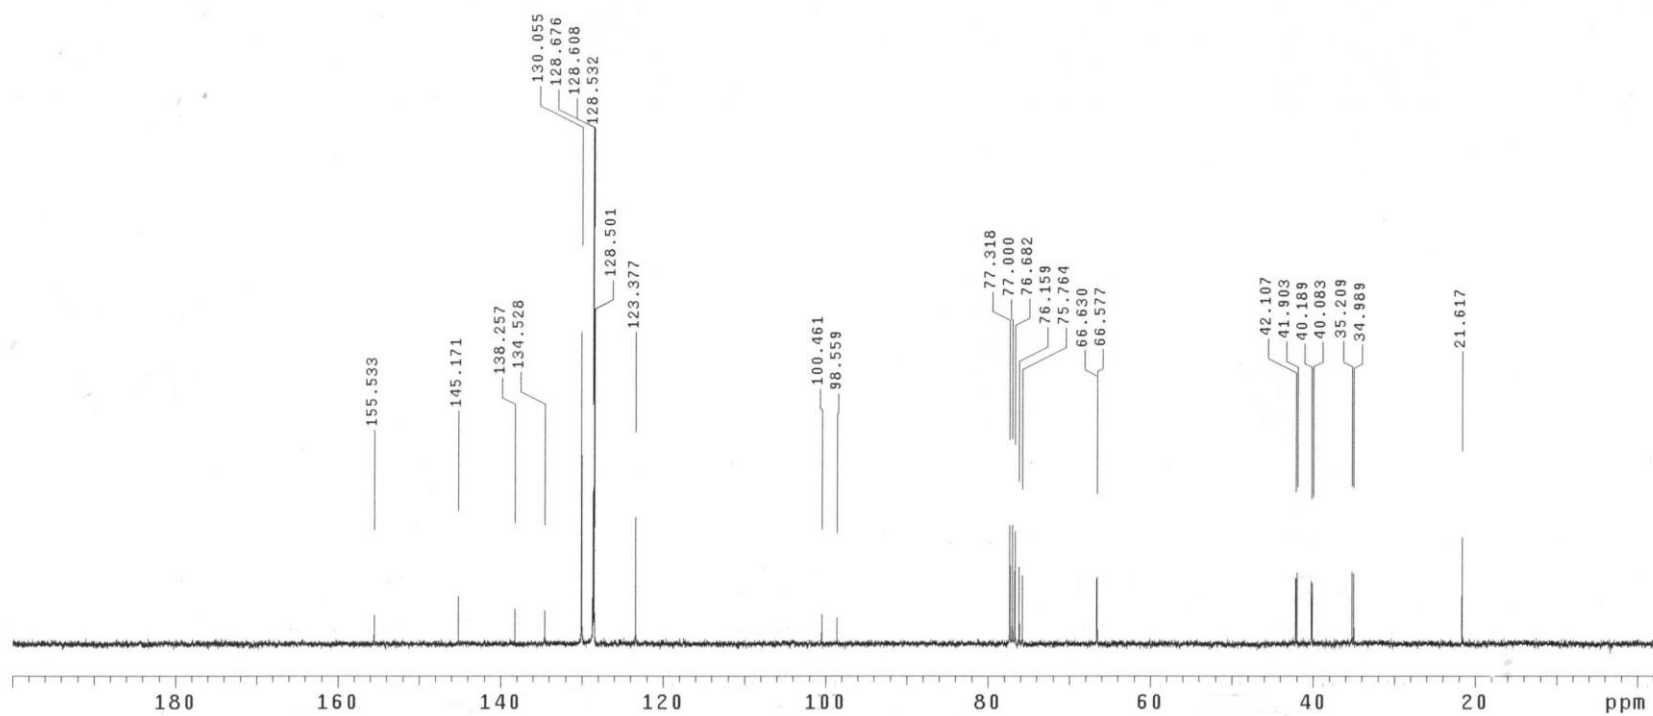

# Compound 5n (<sup>1</sup>H-NMR spectral data-1)

NC0131NB

Pulse Sequence: s2pu1

UNITYplus-400 "unity400"

Date: Feb 11 2020

Solvent: CDCl<sub>3</sub>

Ambient temperature

Total 32 repetitions

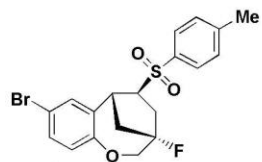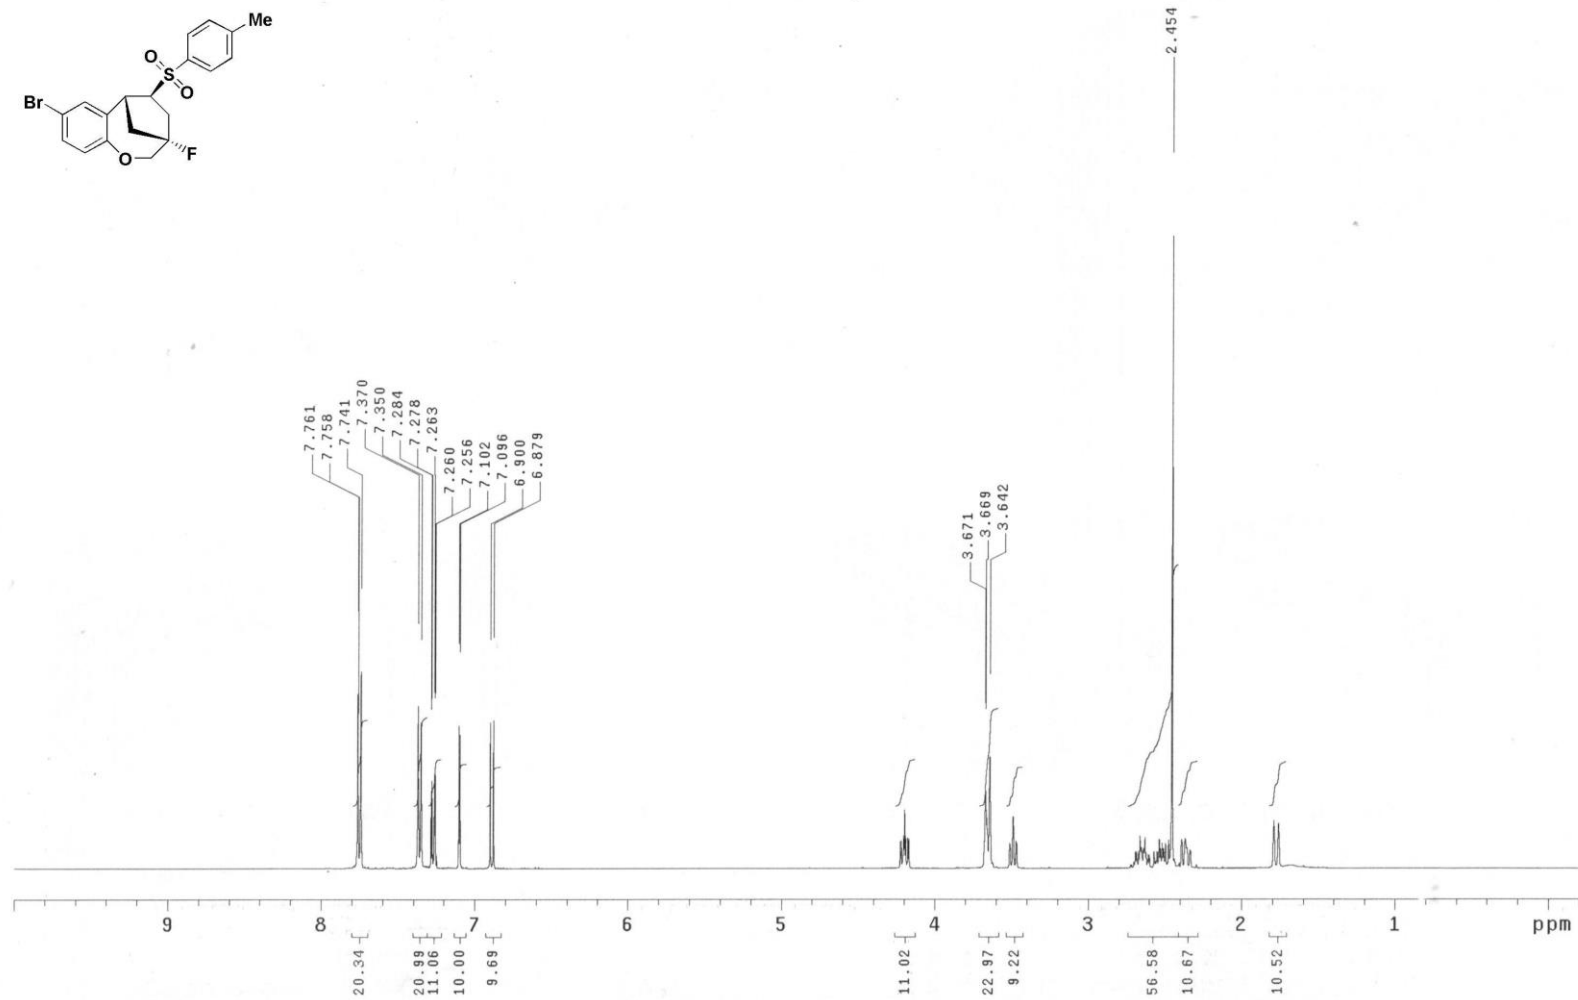

# Compound 5n (<sup>1</sup>H-NMR spectral data-2)

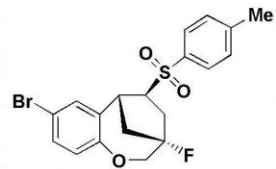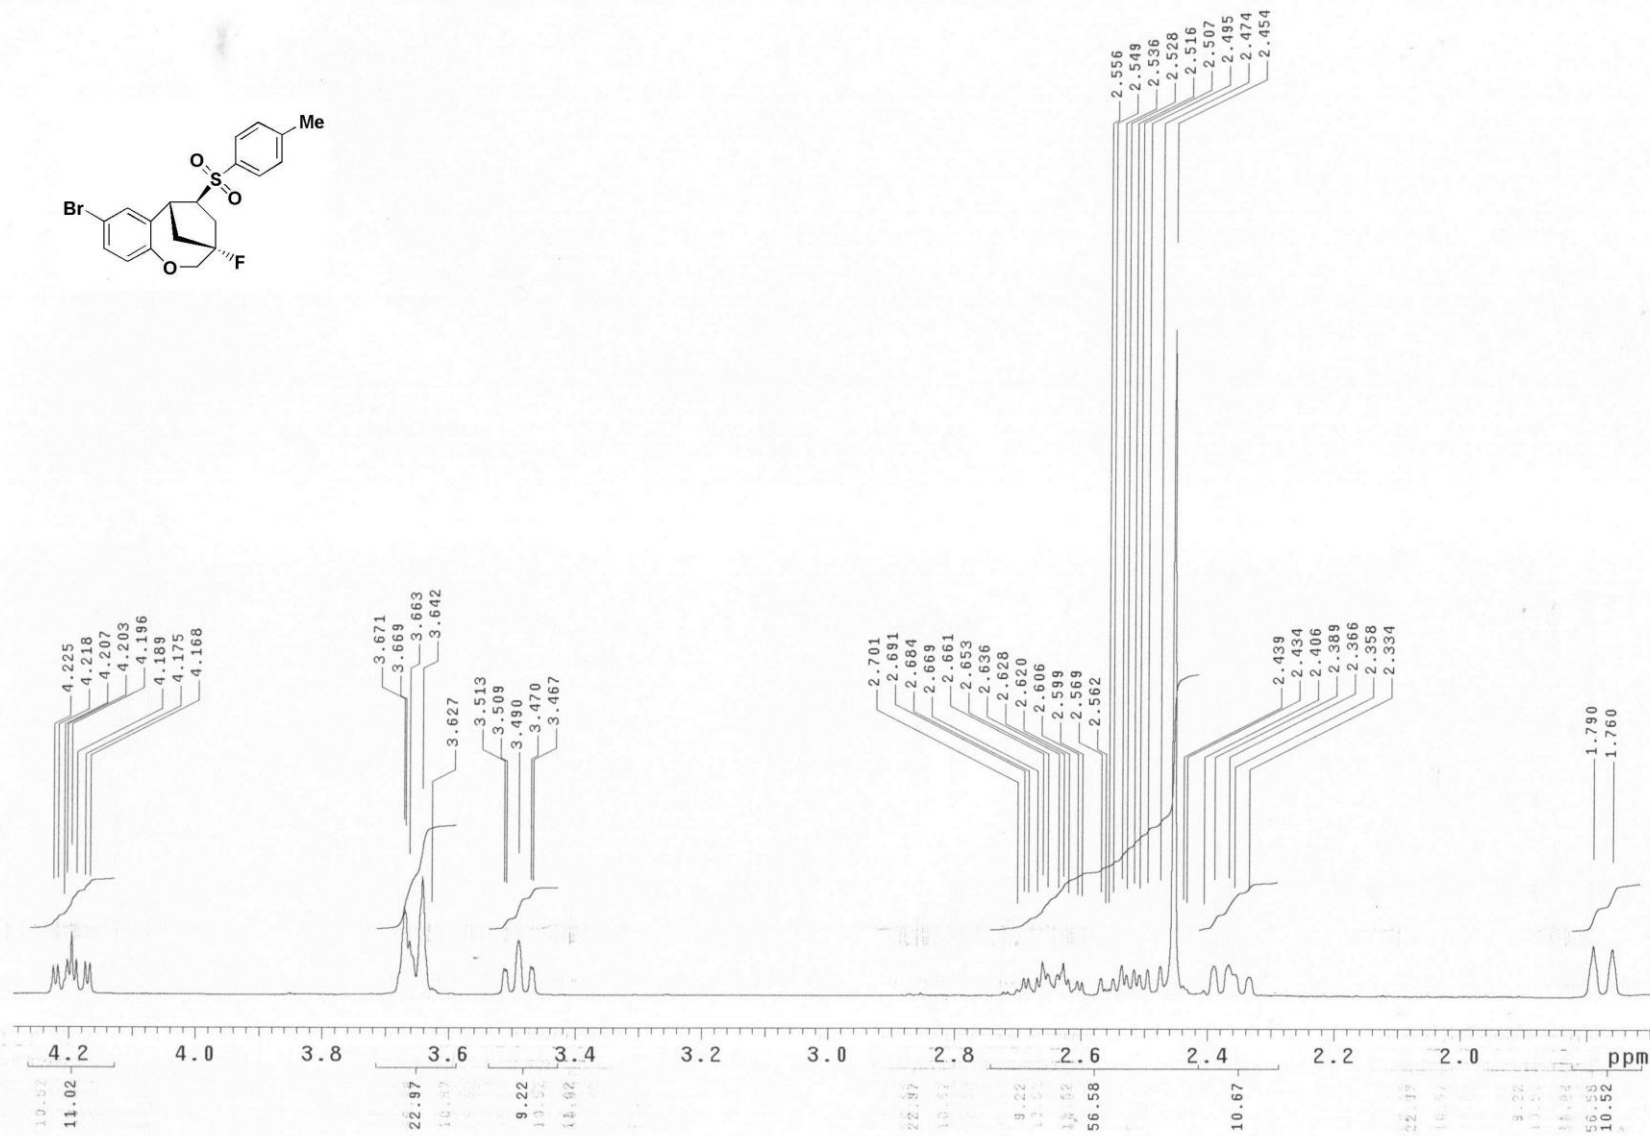



# Compound 5n (<sup>13</sup>C-NMR spectral data)

NC0131NB

Pulse Sequence: s2pu1  
UNITYplus-400 "unity400"  
Date: Feb 11 2020  
Solvent: CDCl<sub>3</sub>  
Ambient temperature  
Total 1024 repetitions

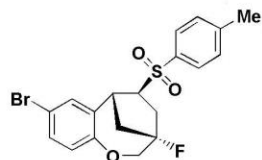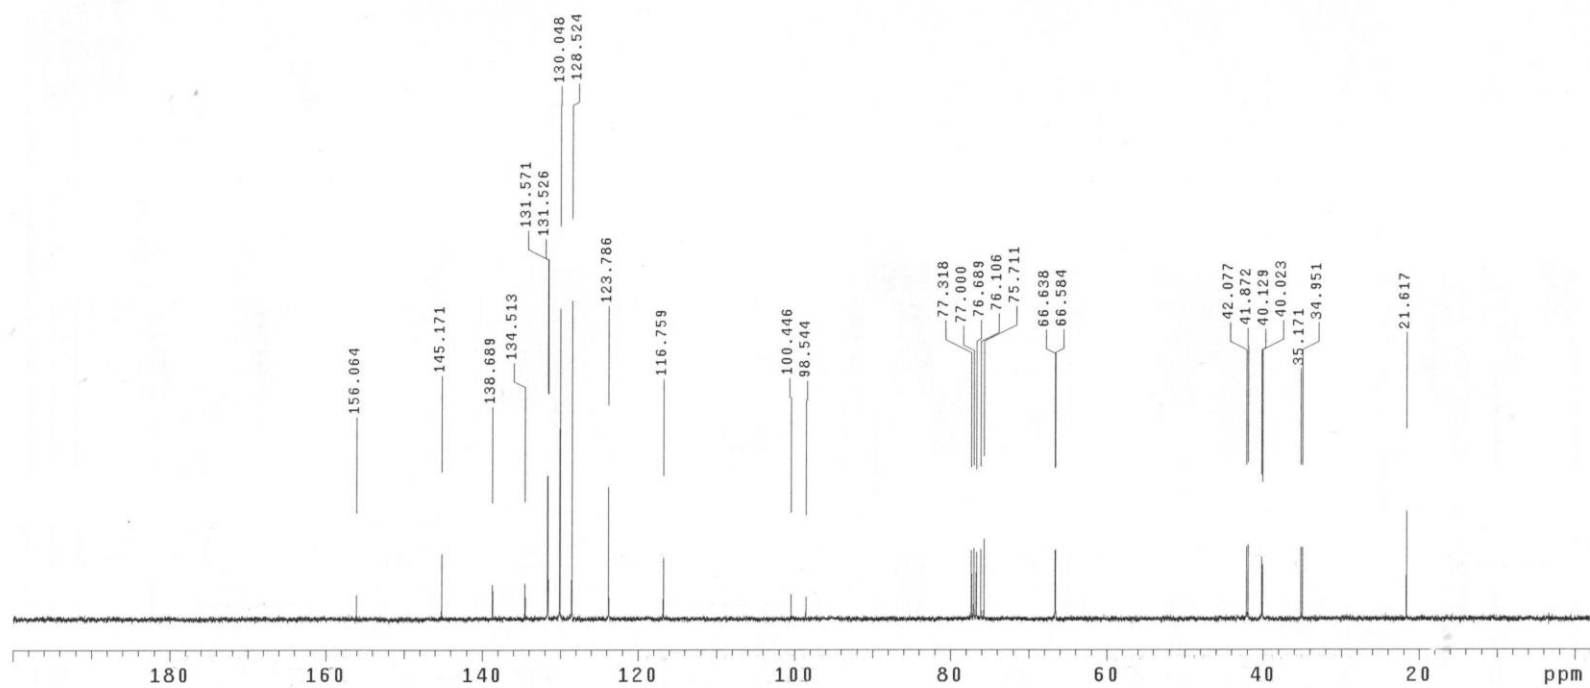

# Compound 5o (<sup>1</sup>H-NMR spectral data-1)

NC1226NB

Pulse Sequence: s2pu1

UNITYplus-400 "unity400"

Date: Feb 18 2020

Solvent: CDCl<sub>3</sub>

Ambient temperature

Total 32 repetitions

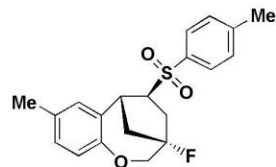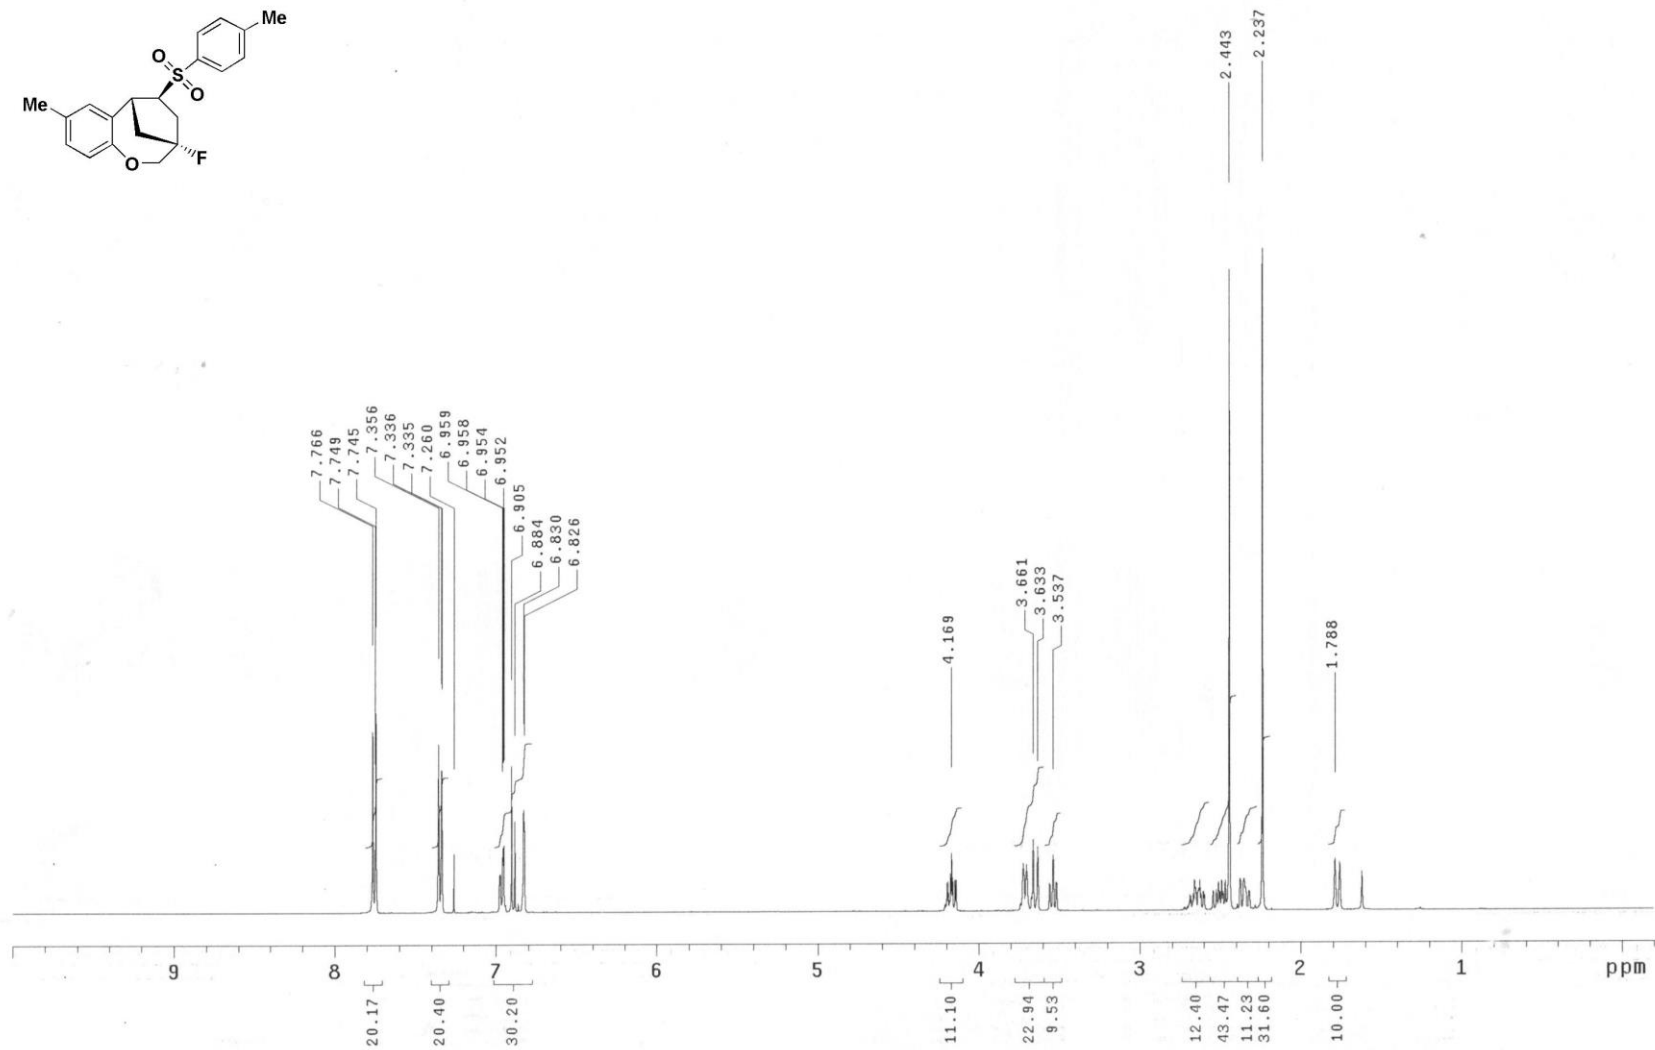

# Compound 5o (<sup>1</sup>H-NMR spectral data-2)

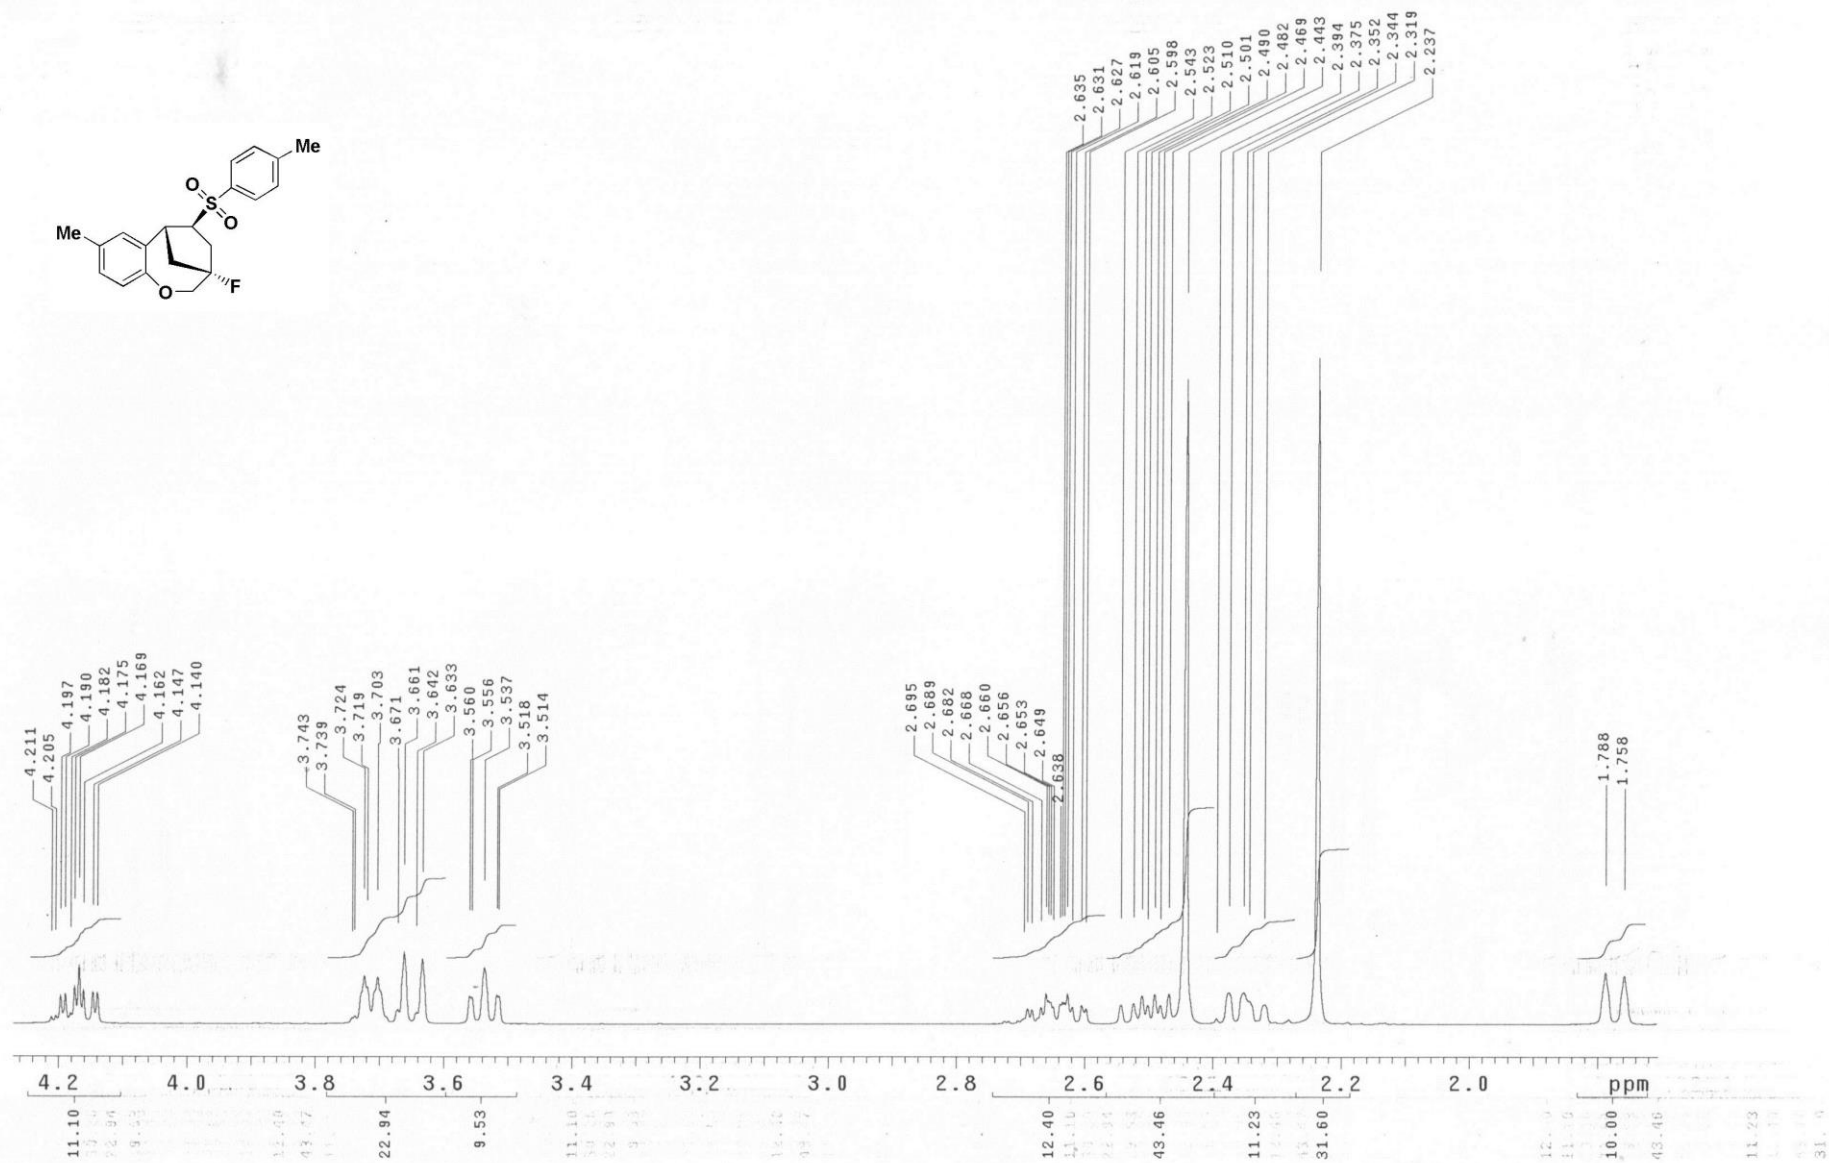

# Compound 5o (<sup>13</sup>C-NMR spectral data)

NC1226NB

Pulse Sequence: s2pu1  
UNITYplus-400 "unity400"  
Date: Feb 18 2020  
Solvent: CDCl<sub>3</sub>  
Ambient temperature  
Total 800 repetitions

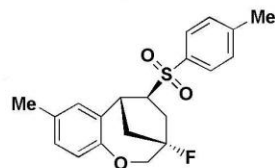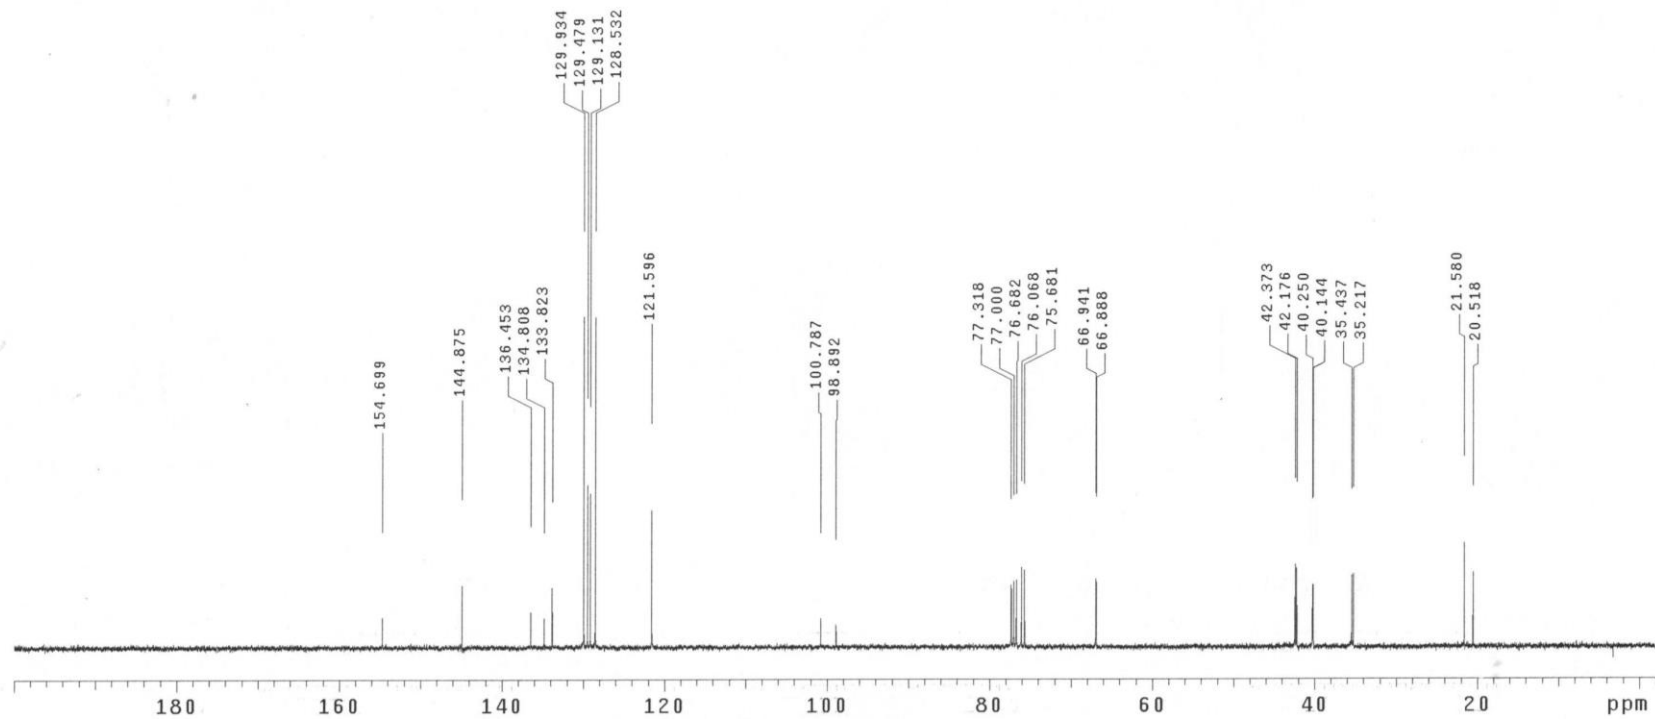

# Compound 5p (<sup>1</sup>H-NMR spectral data)

NC0106NB

Pulse Sequence: s2pu1  
 UNITYplus-400 "unity400"  
 Date: Feb 10 2020  
 Solvent: CDC13  
 Ambient temperature  
 Total 32 repetitions

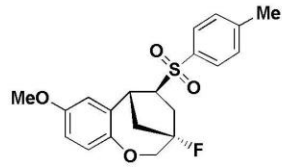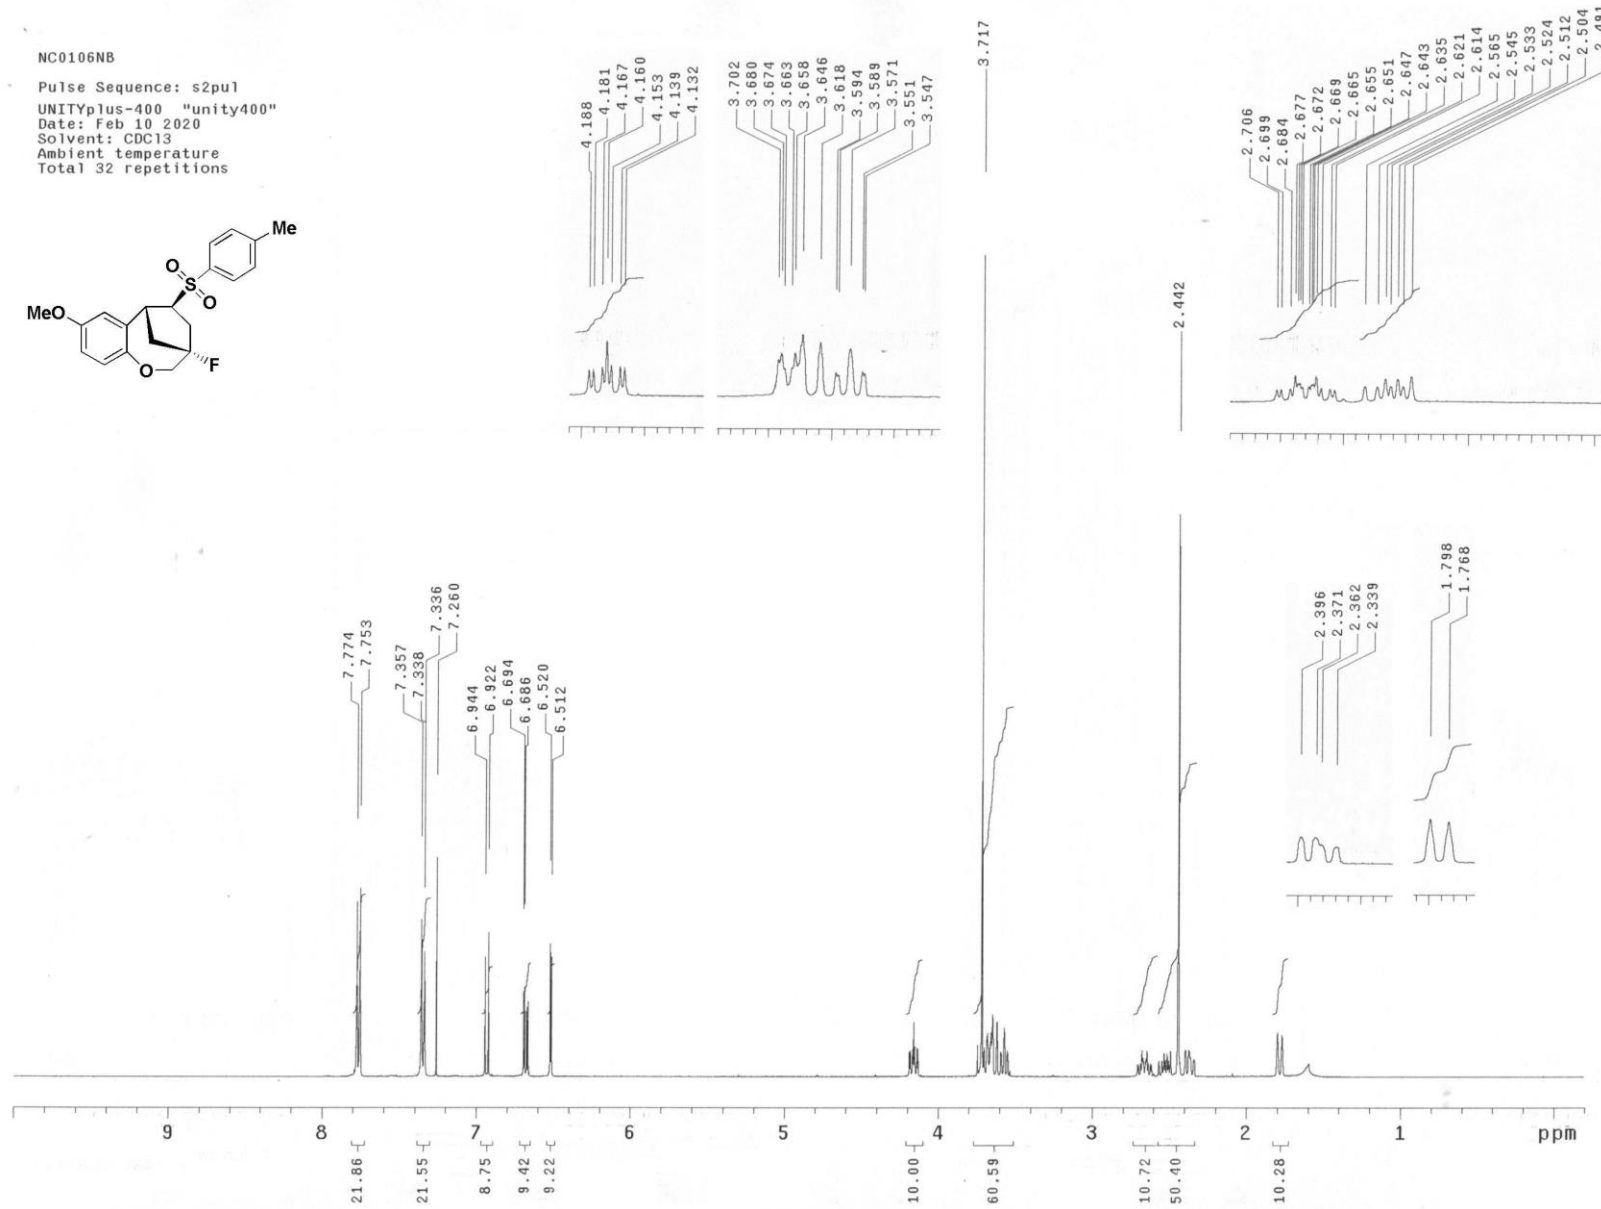

# Compound 5p (<sup>13</sup>C-NMR spectral data)

NC0106NB

Pulse Sequence: s2pu1  
UNITYplus-400 "unity400"  
Date: Feb 10 2020  
Solvent: CDCl<sub>3</sub>  
Ambient temperature  
Total 4192 repetitions

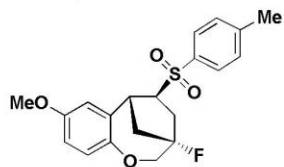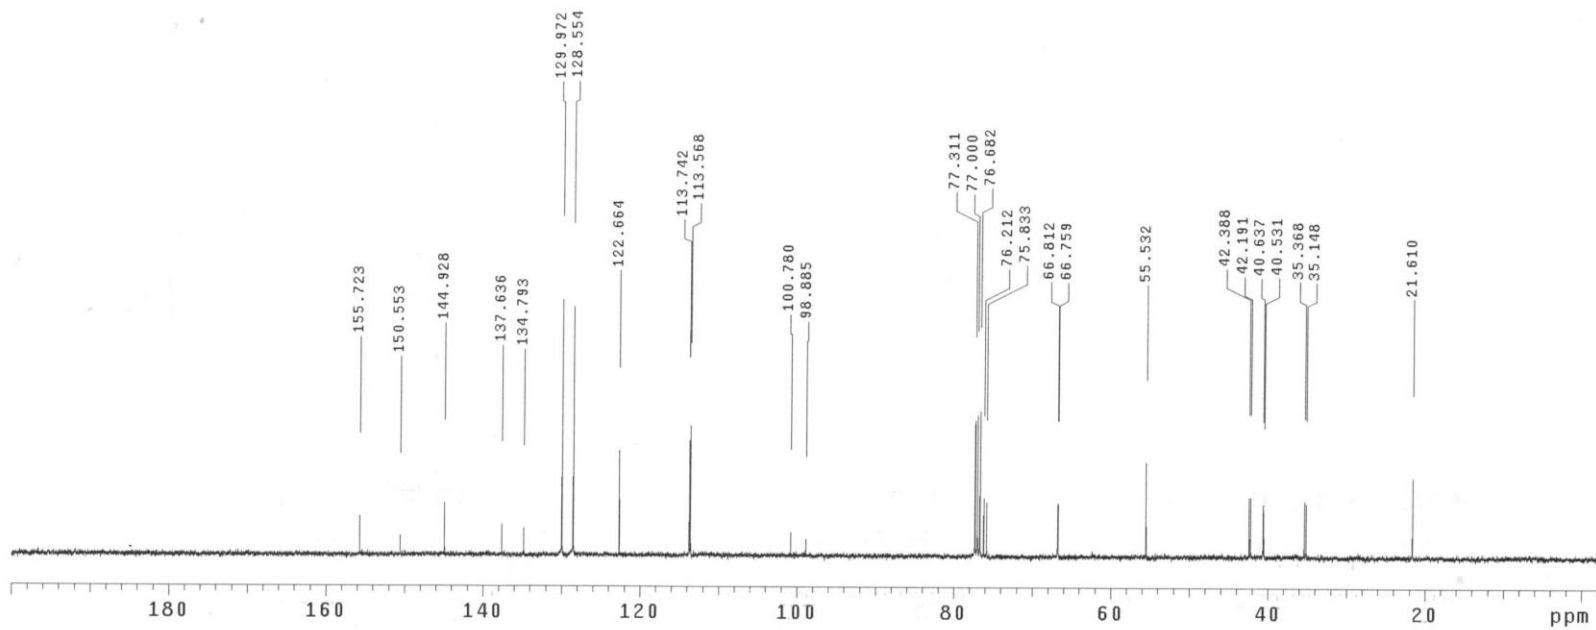

# Compound 5q (<sup>1</sup>H-NMR spectral data)

NC1230NB  
 Pulse Sequence: s2pu1  
 UNITYplus-400 "unity400"  
 Date: Jan 14 2020  
 Solvent: CDC13  
 Ambient temperature  
 Total 64 repetitions

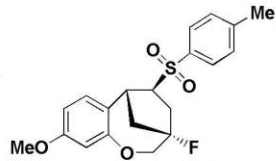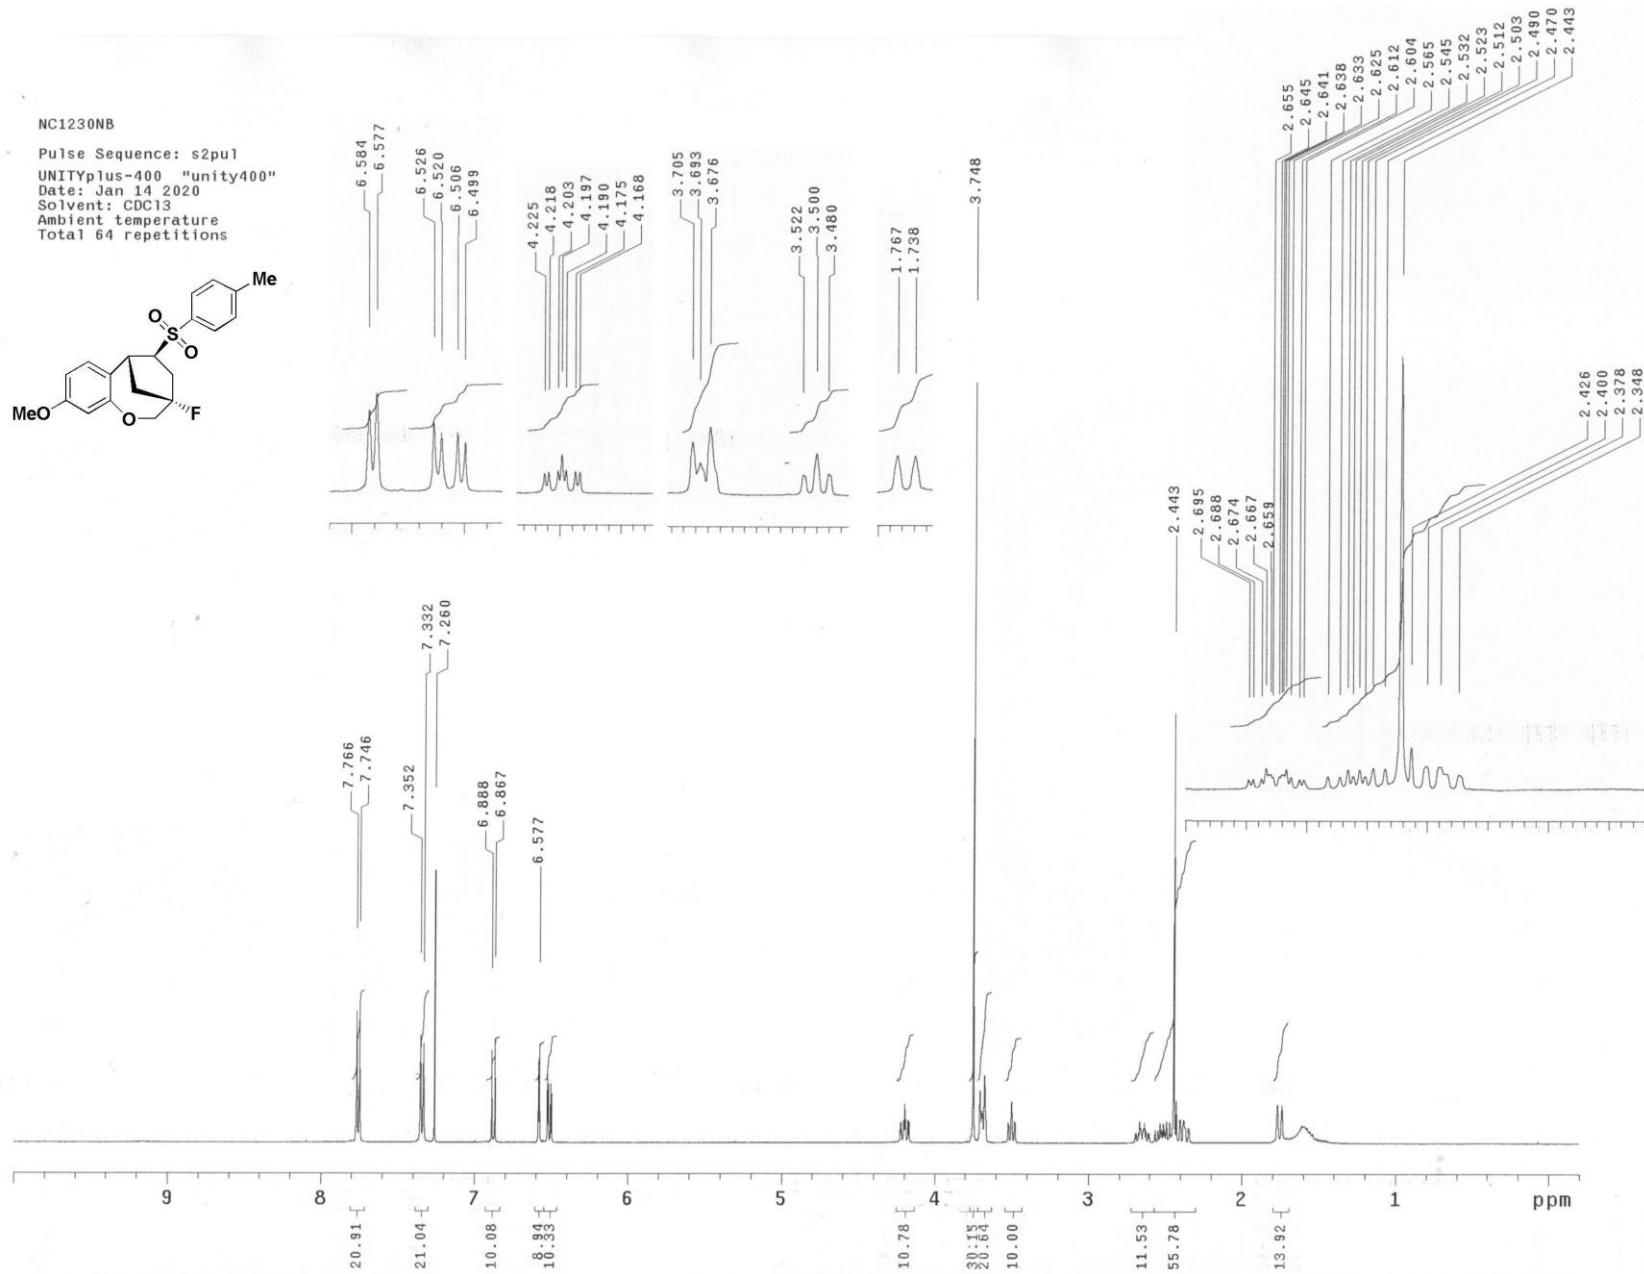

# Compound 5q (<sup>13</sup>C-NMR spectral data)

NC1230NB

Pulse Sequence: s2pu1  
UNITYplus-400 "unity400"  
Date: Jan 14 2020  
Solvent: CDCl<sub>3</sub>  
Ambient temperature  
Total 8304 repetitions

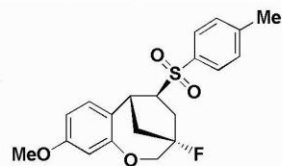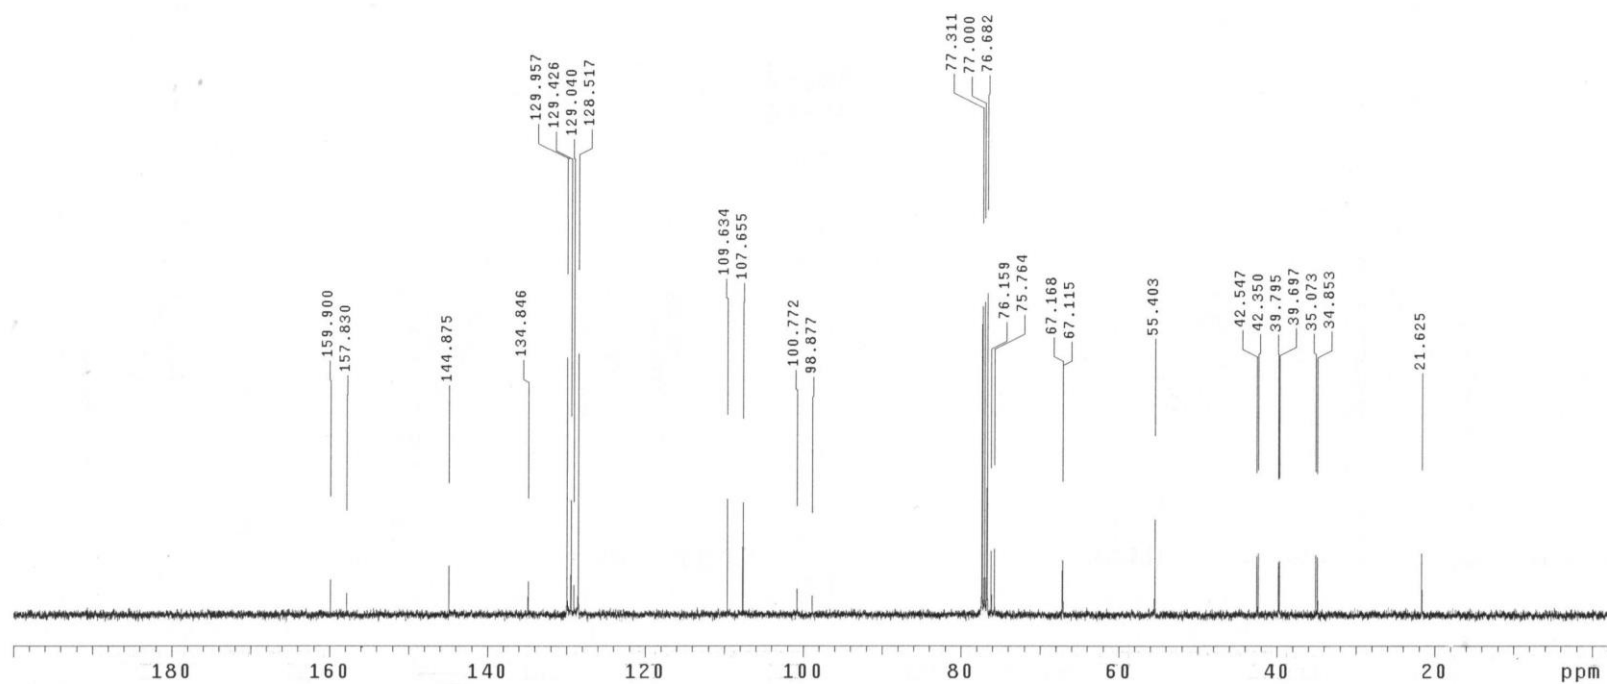



# Compound 5r (<sup>1</sup>H-NMR spectral data-1)

NC0317Bu

Pulse Sequence: s2pu1  
 UNITYplus-400 "unity400"  
 Date: Mar 17 2020  
 Solvent: CDC13  
 Ambient temperature  
 Total 112 repetitions

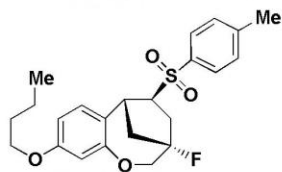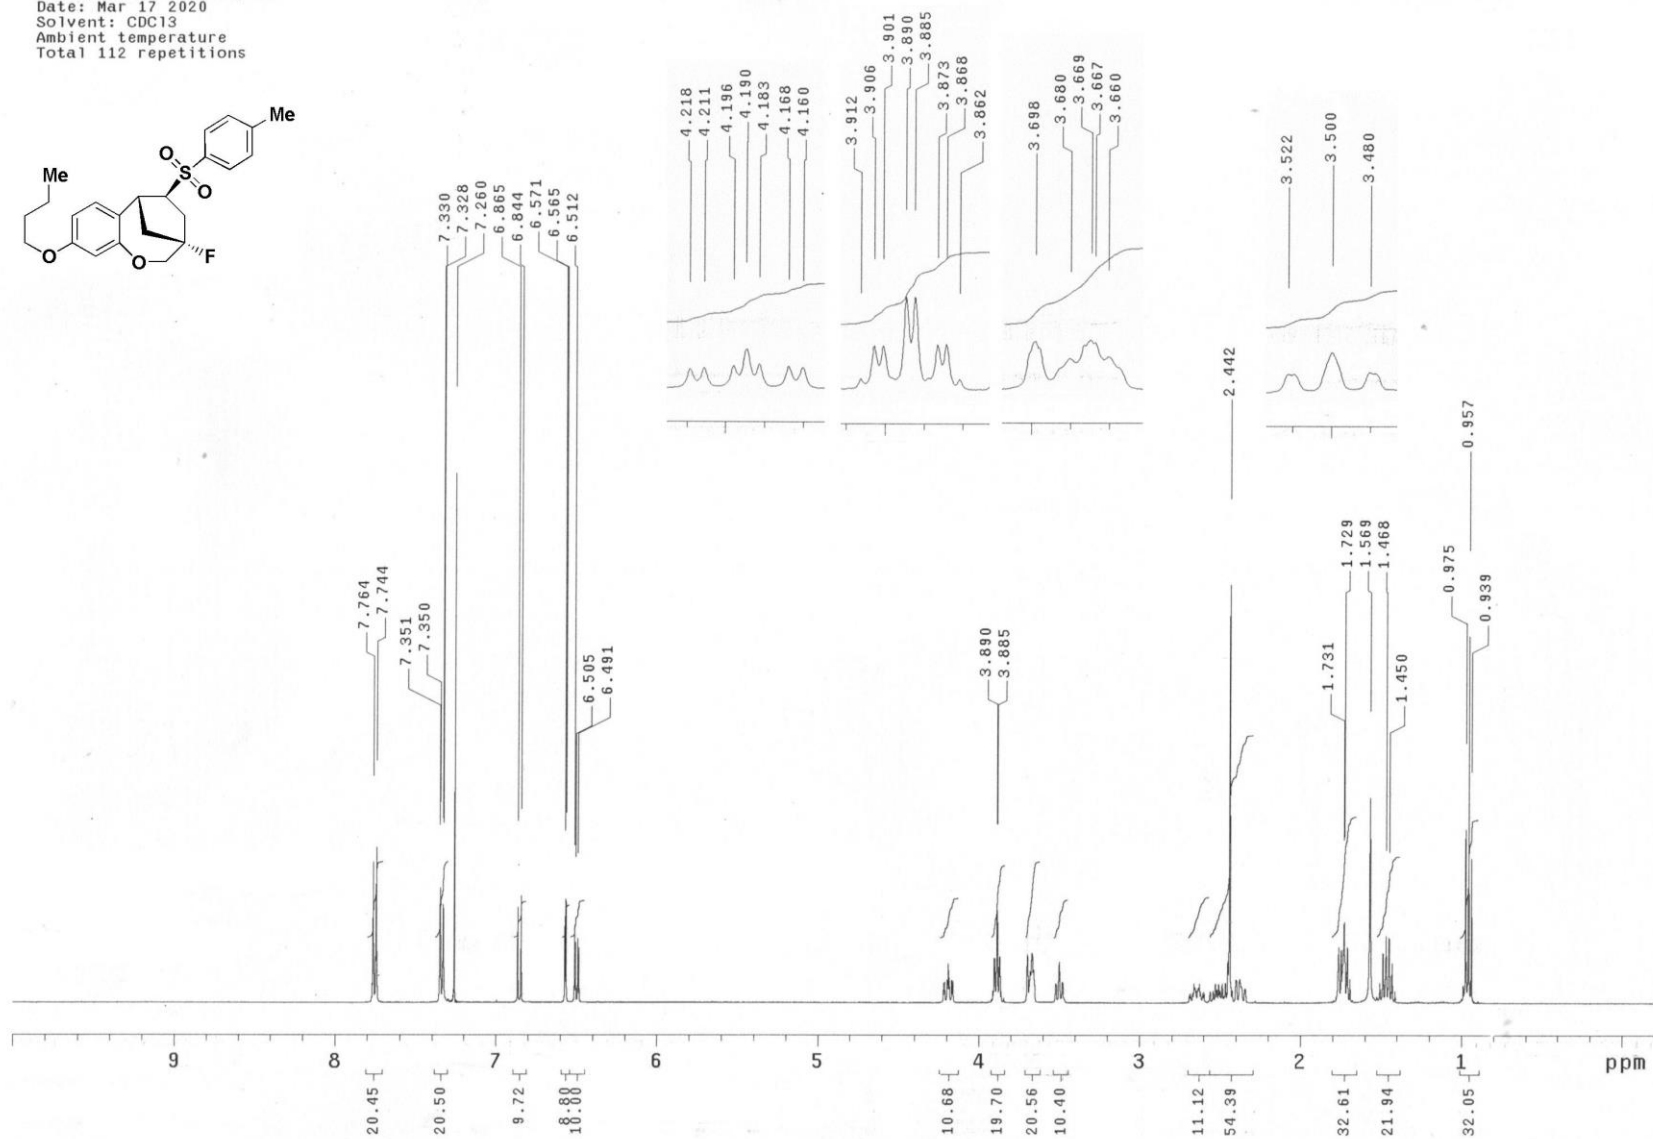

# Compound 5r (<sup>1</sup>H-NMR spectral data-2)

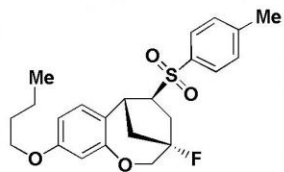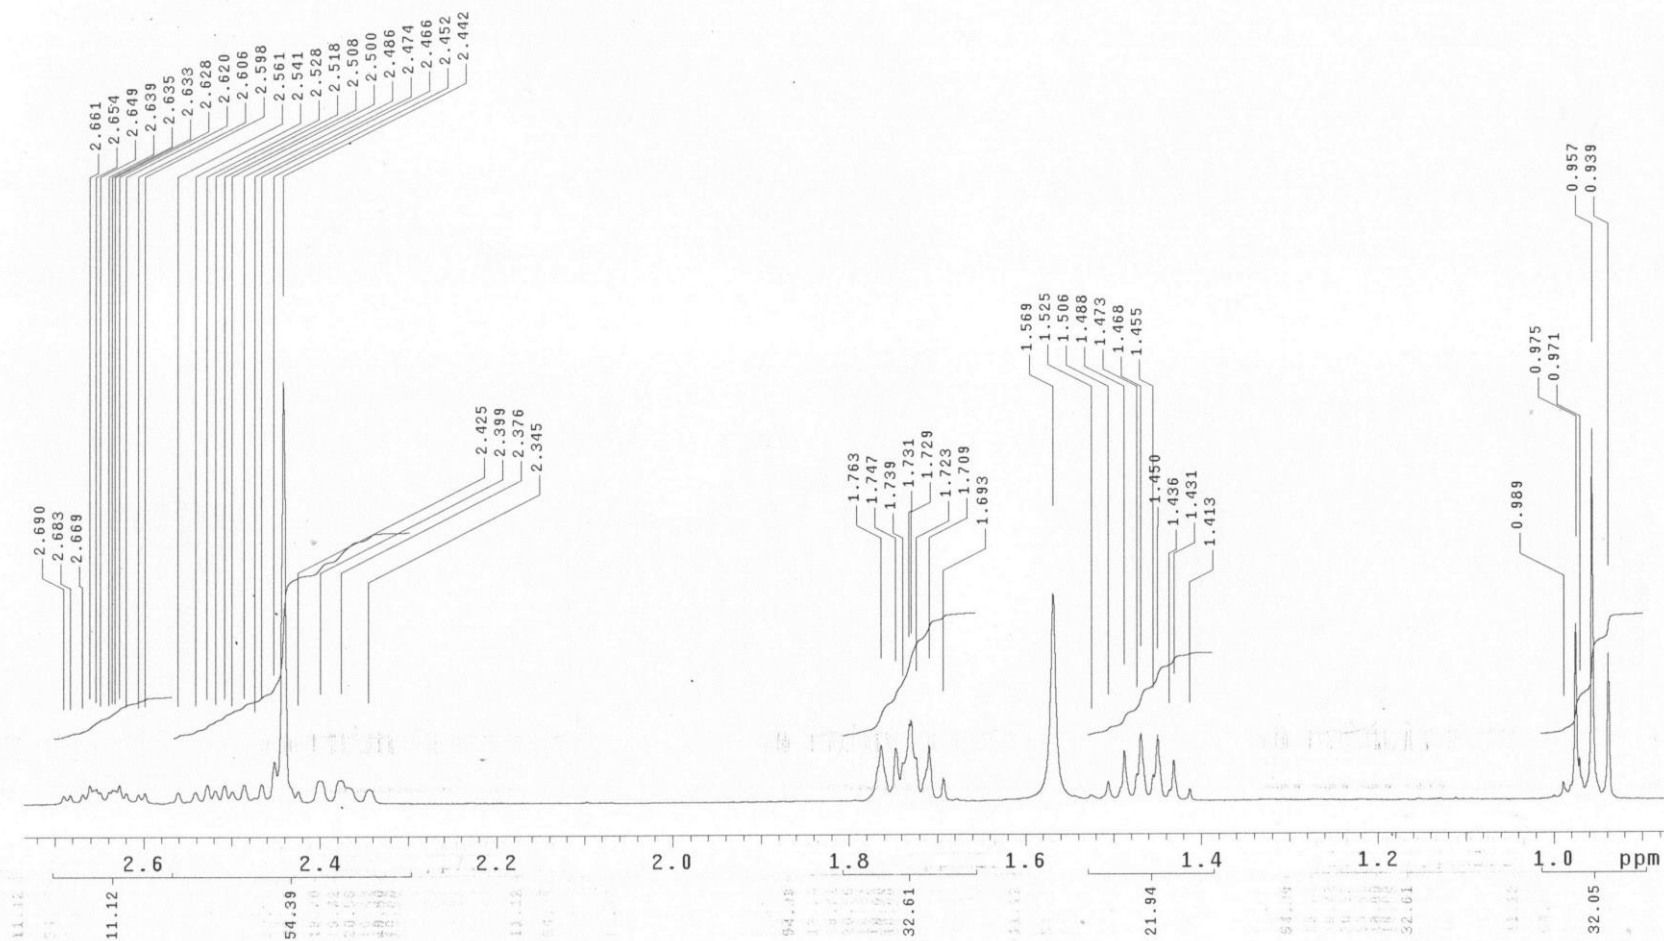

# Compound 5r (<sup>13</sup>C-NMR spectral data)

NC0317Bu

Pulse Sequence: s2pu1

UNITYplus-400 "unity400"

Date: Mar 17 2020

Solvent: CDCl<sub>3</sub>

Ambient temperature

Total 13952 repetitions

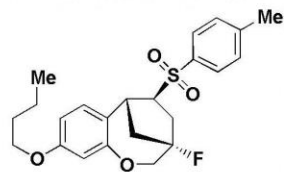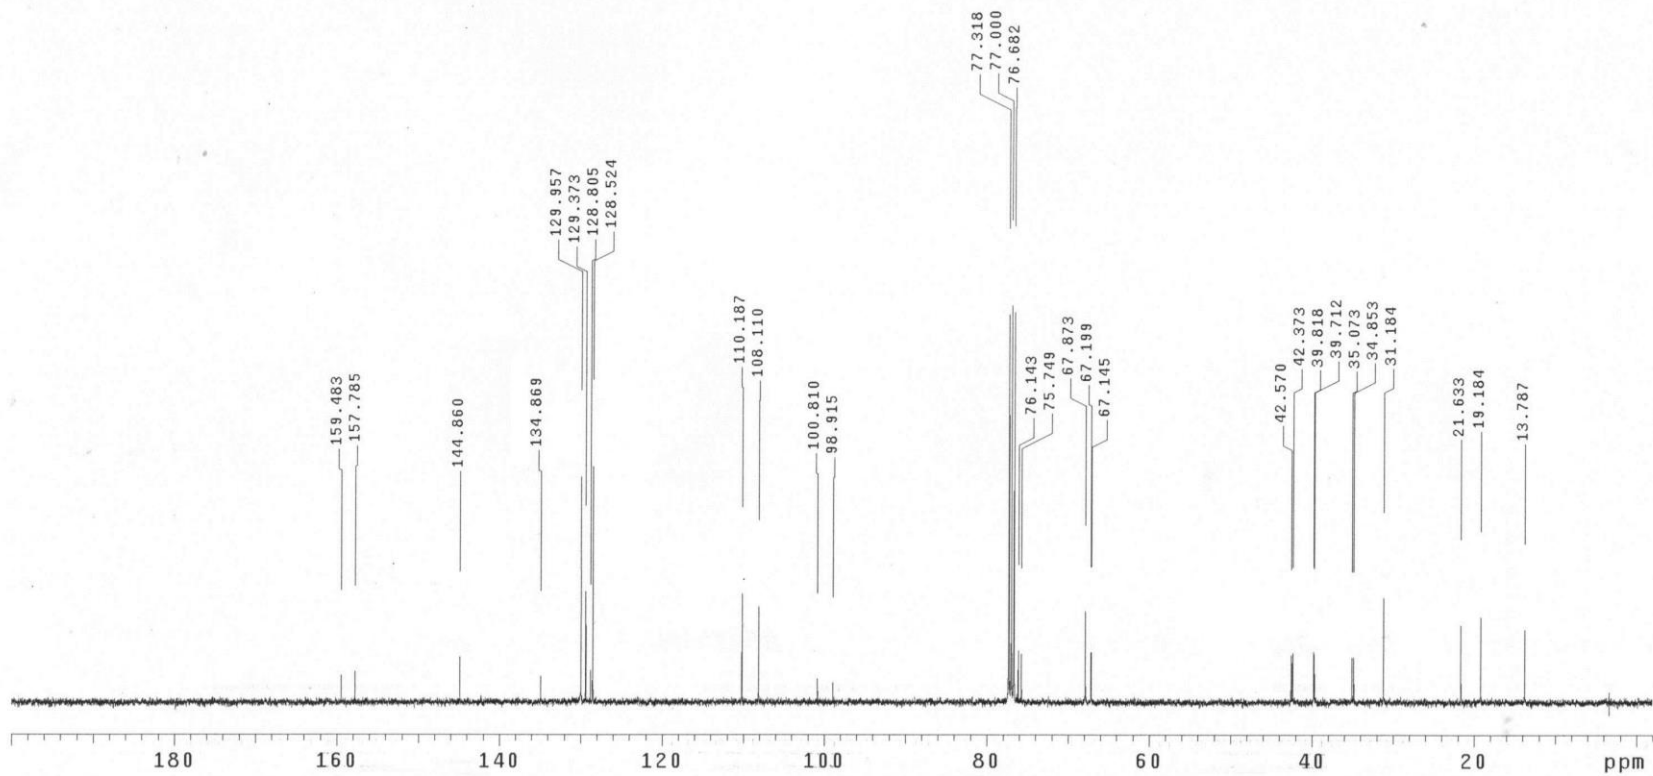

# Compound 5r-1 (<sup>1</sup>H-NMR spectral data)

NCK62931

Pulse Sequence: s2pu1  
 UNITYplus-400 "unity400"  
 Date: Mar 6 2020  
 Solvent: CDC13  
 Ambient temperature  
 Total 160 repetitions

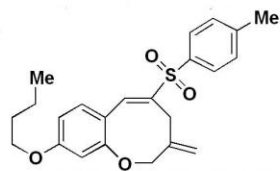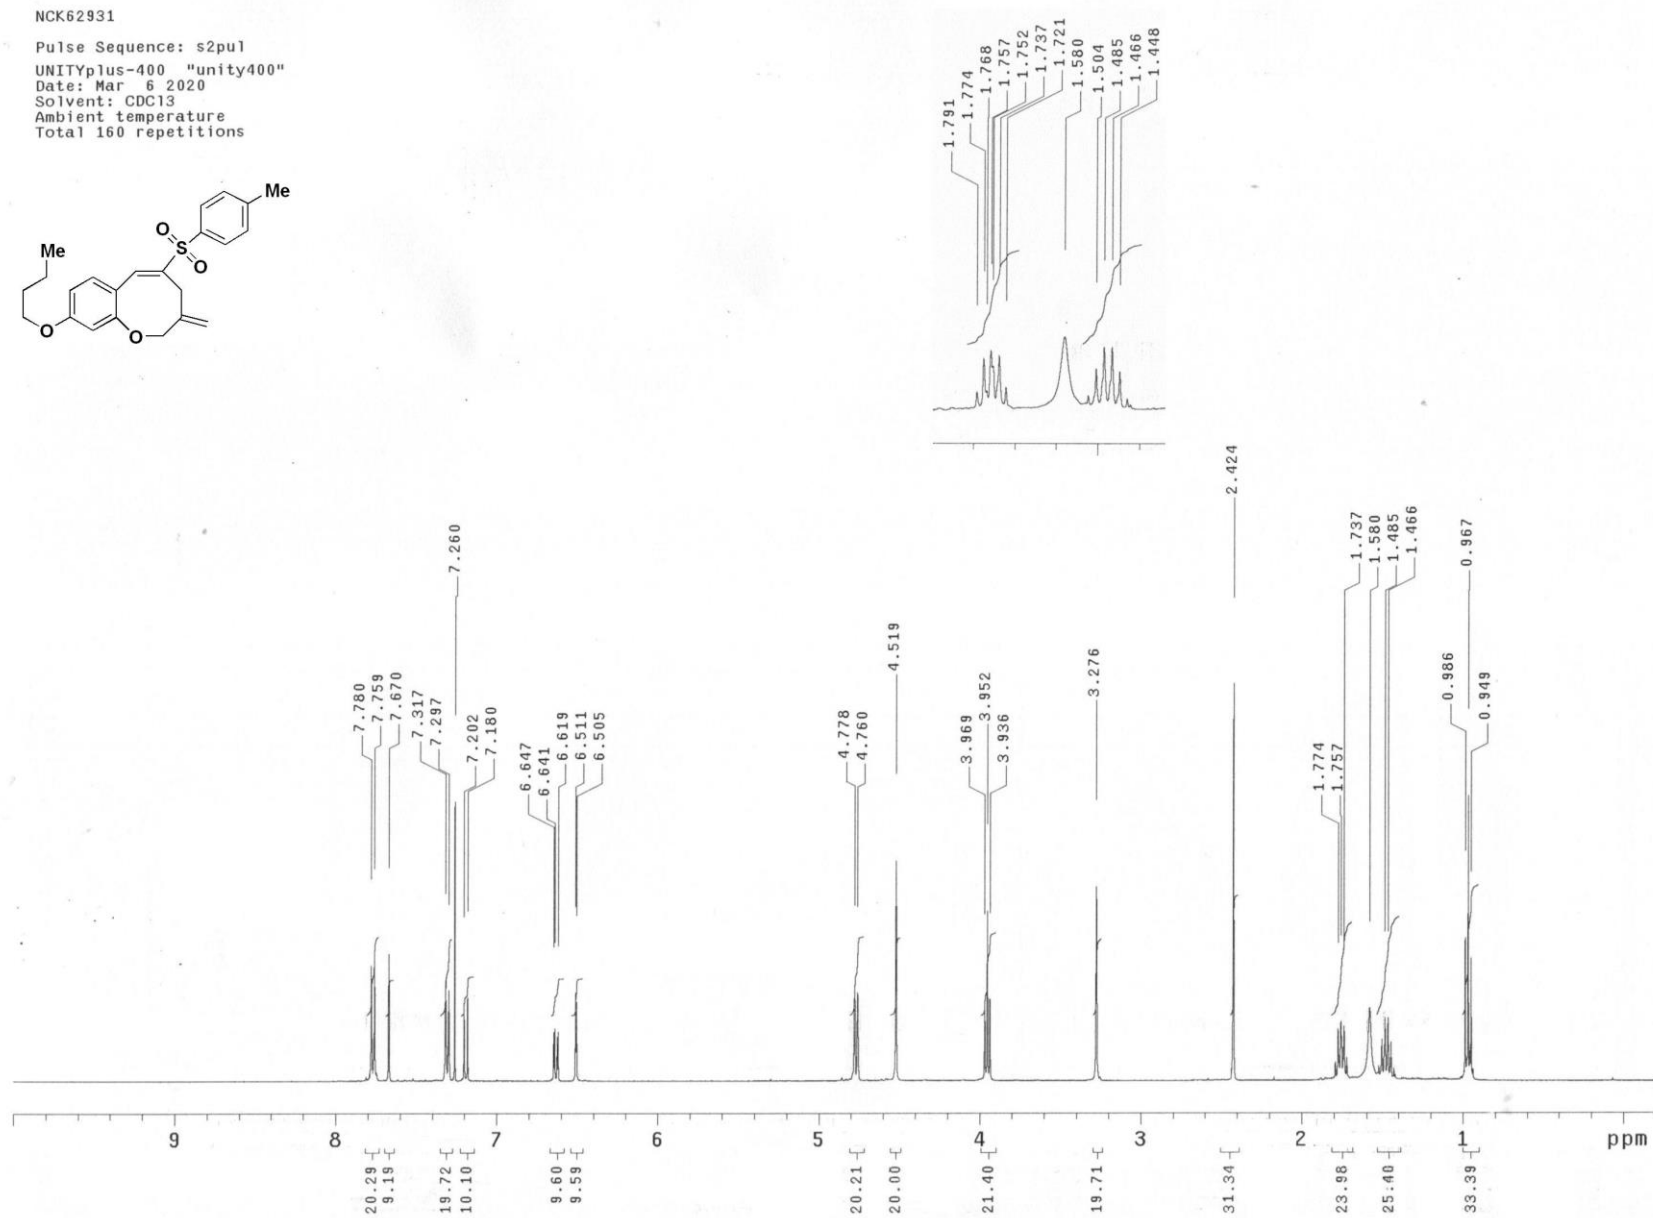

# Compound 5r-1 (<sup>13</sup>C-NMR spectral data)

NCK62931

Pulse Sequence: s2pu1  
UNITYplus-400 "unity400"  
Date: Mar 6 2020  
Solvent: CDCl<sub>3</sub>  
Ambient temperature  
Total 32000 repetitions

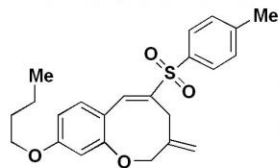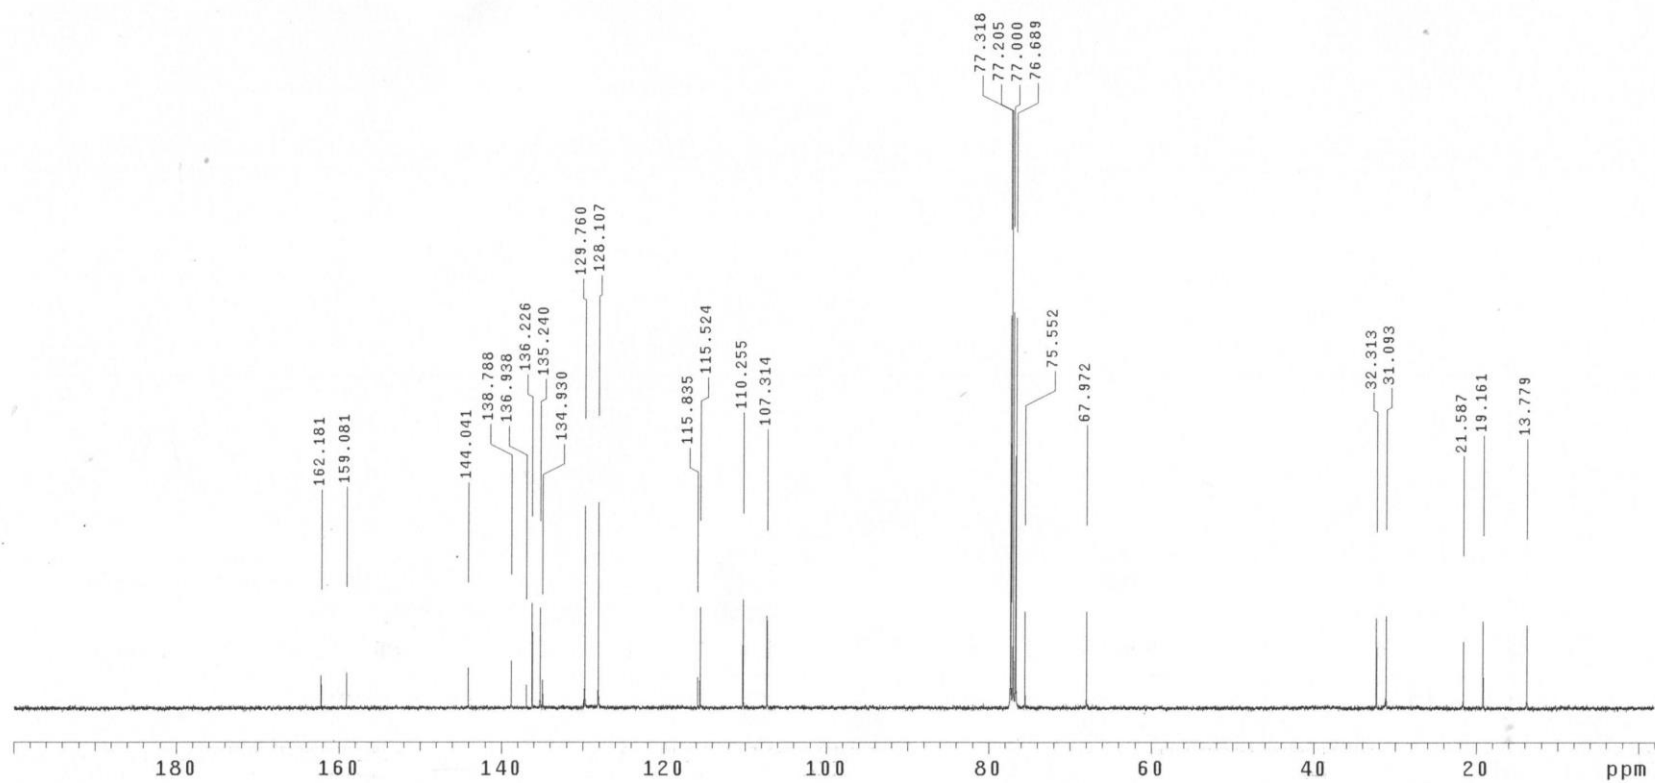

# Compound 5s (<sup>1</sup>H-NMR spectral data)

NC0130NB

Pulse Sequence: s2pu1  
 UNITYplus-400 "unity400"  
 Date: Feb 27 2020  
 Solvent: CDC13  
 Ambient temperature  
 Total 32 repetitions

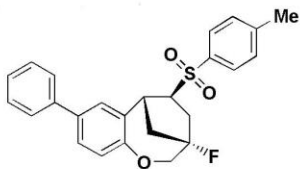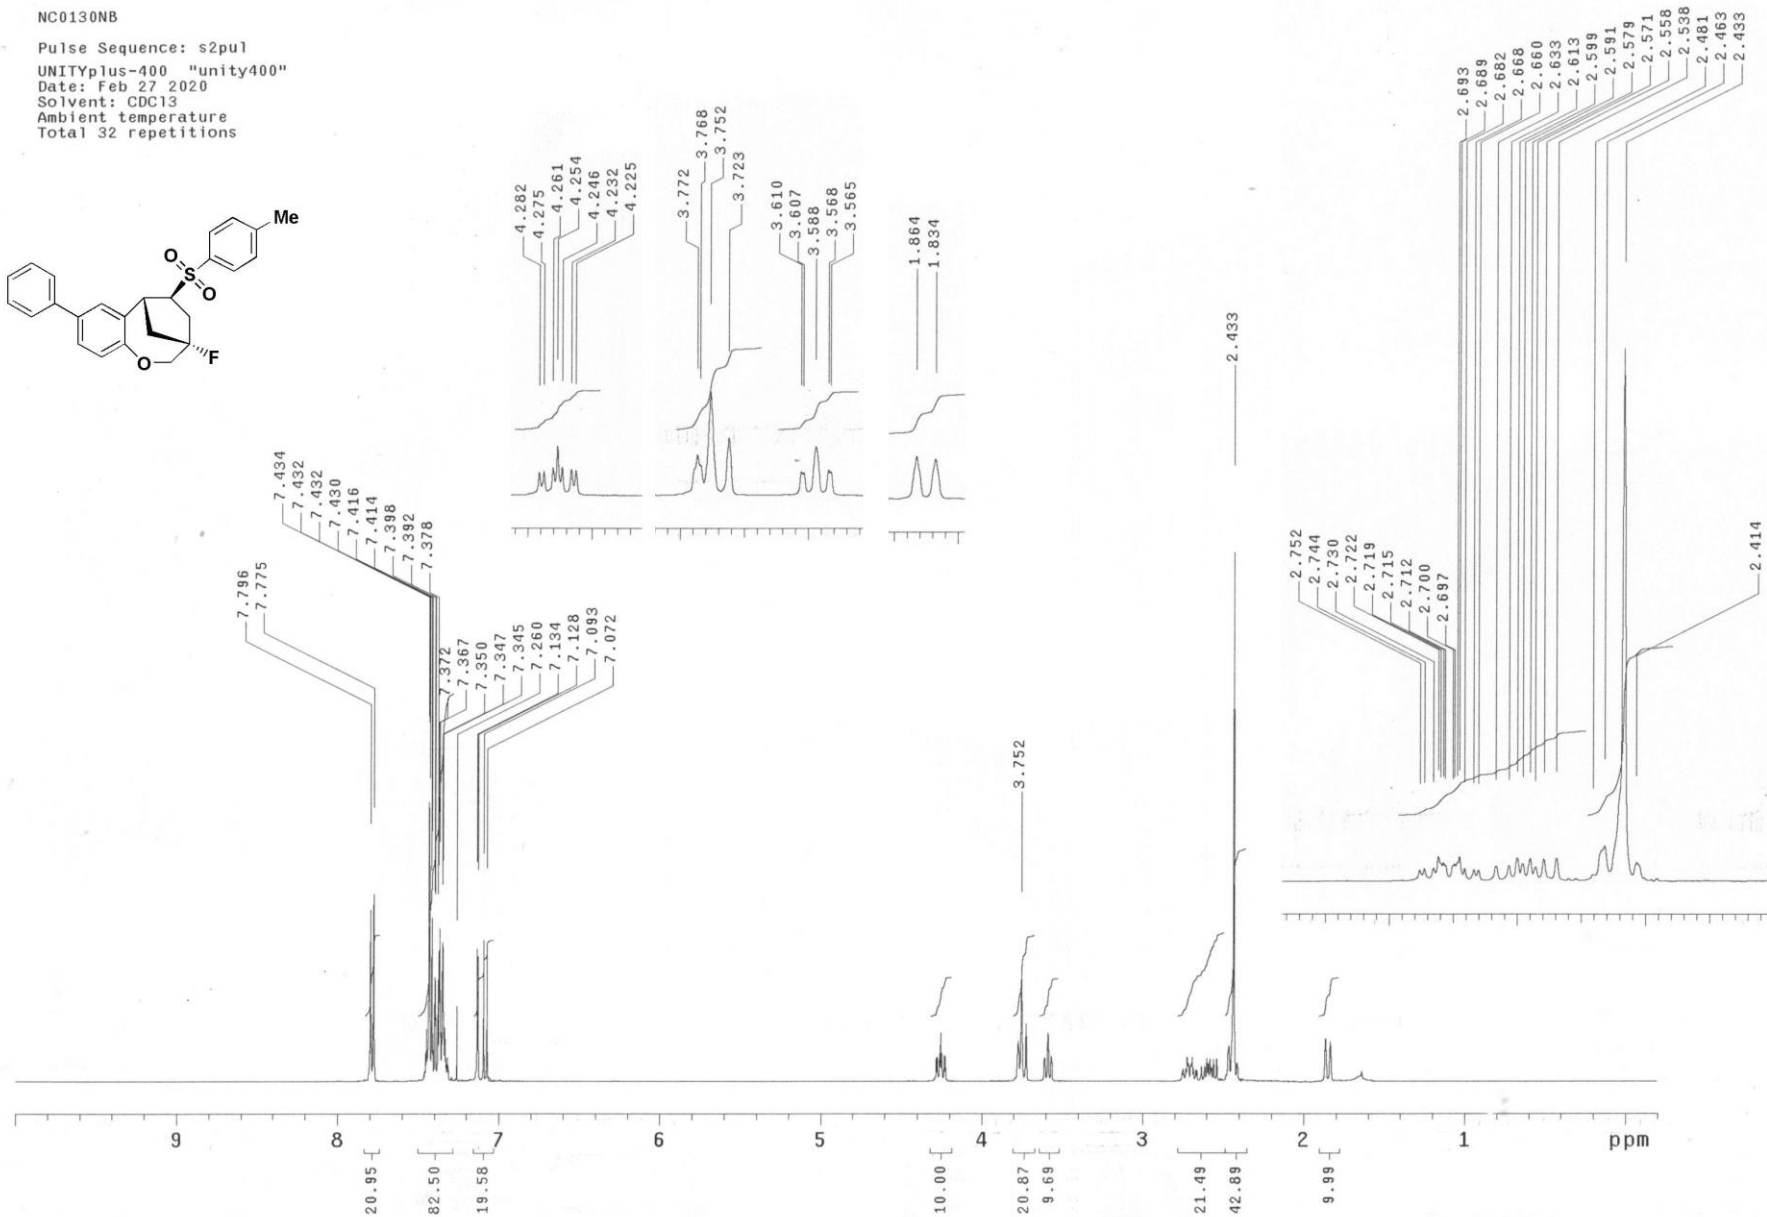

# Compound 5s (<sup>13</sup>C-NMR spectral data)

NC0130NB

Pulse Sequence: s2pu1

UNITYplus-400 "unity400"

Date: Feb 27 2020

Solvent: CDCl<sub>3</sub>

Ambient temperature

Total 1056 repetitions

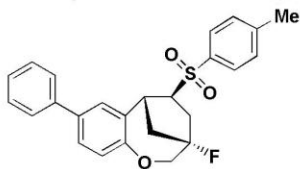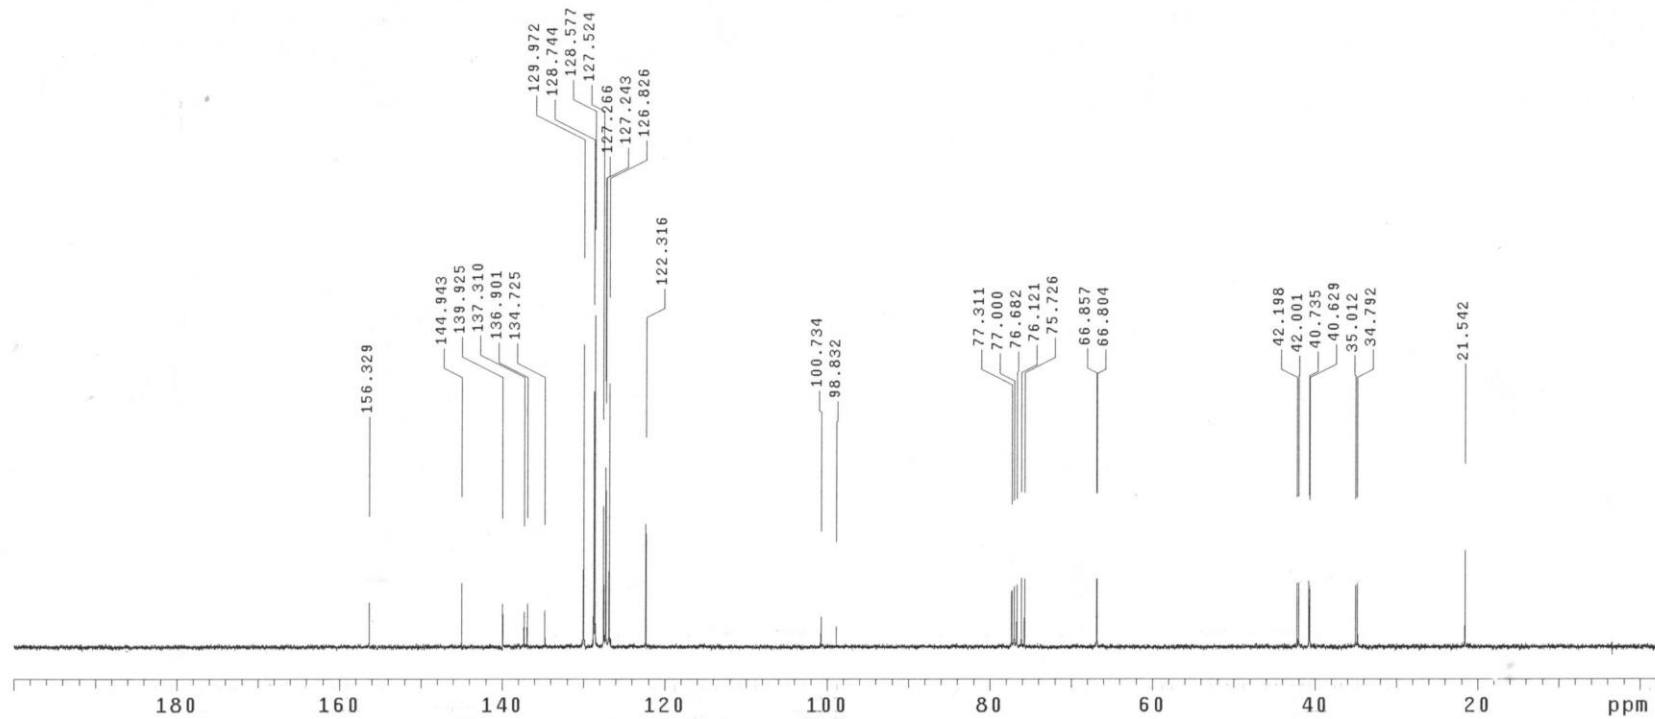

# Compound 6t (<sup>1</sup>H-NMR spectral data)

NC0109NB

Pulse Sequence: s2pu1  
 UNITYplus-400 "unity400"  
 Date: Jan 10 2020  
 Solvent: CDC13  
 Ambient temperature  
 Total 32 repetitions

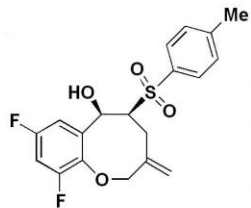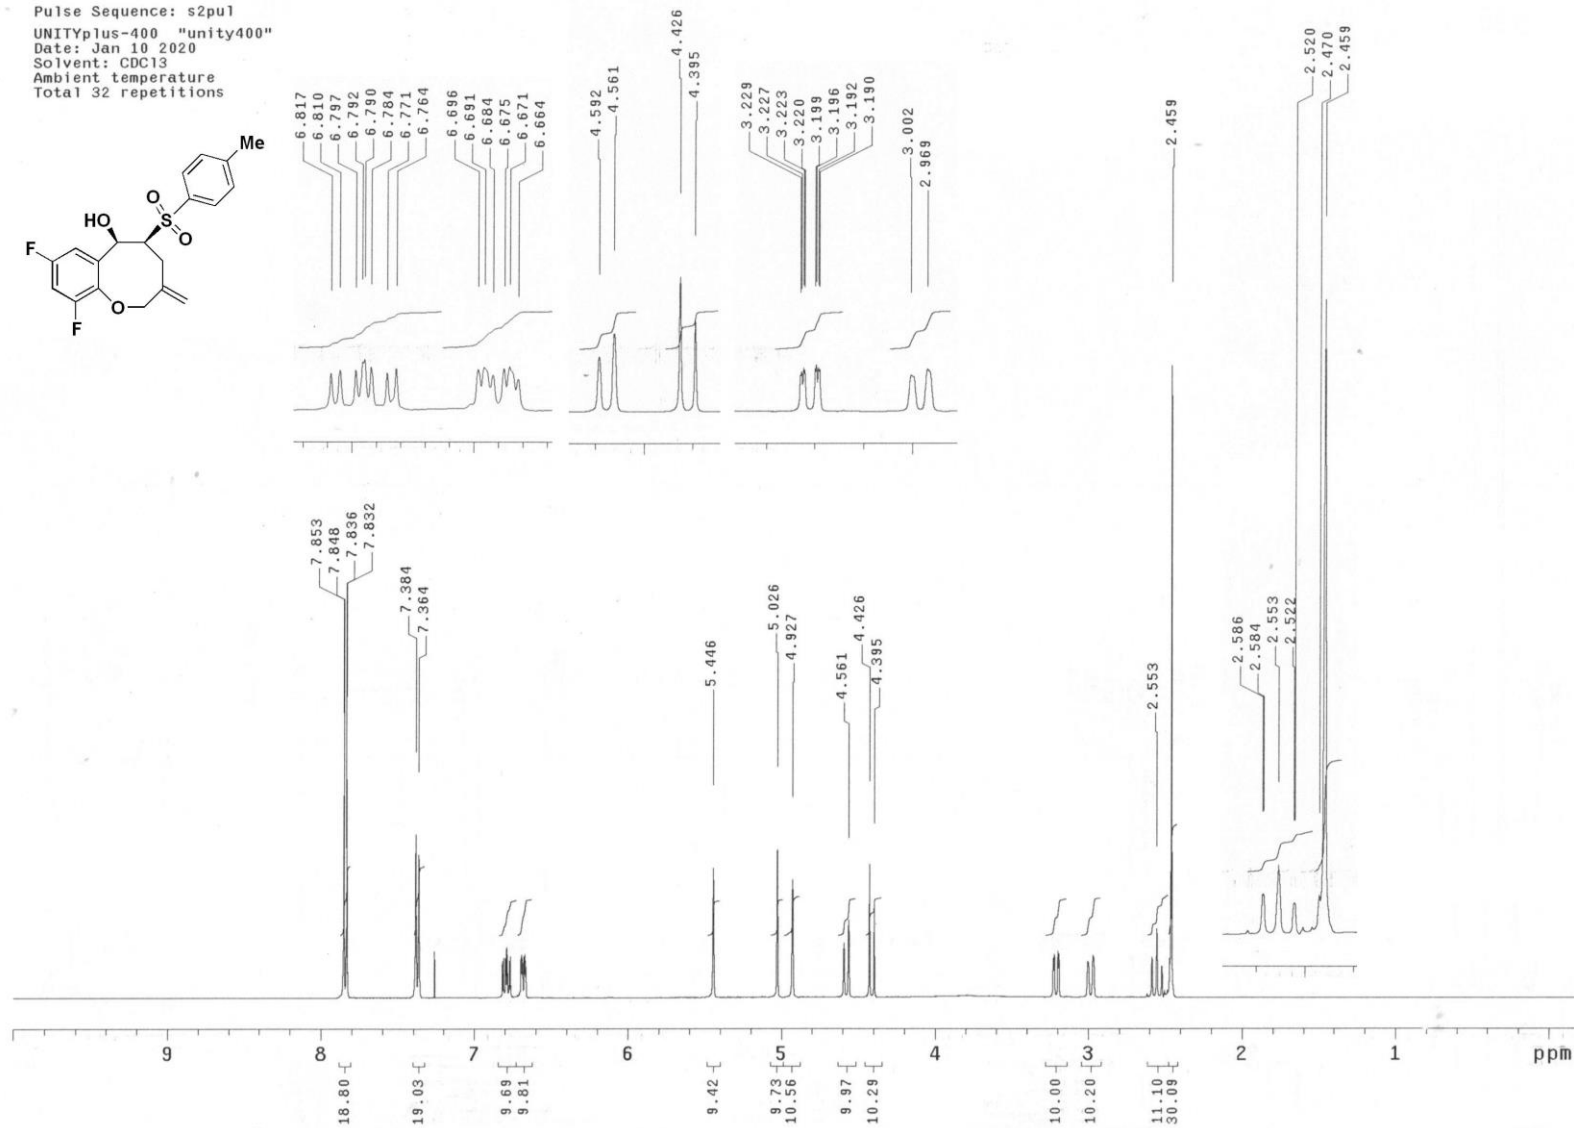



# Compound 6t (<sup>13</sup>C-NMR spectral data)

NC0109NB

Pulse Sequence: s2pu1  
UNITYplus-400 "unity400"  
Date: Jan 10 2020  
Solvent: CDCl<sub>3</sub>  
Ambient temperature  
Total 1440 repetitions

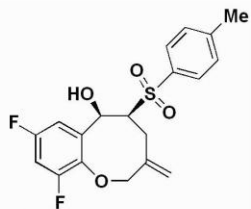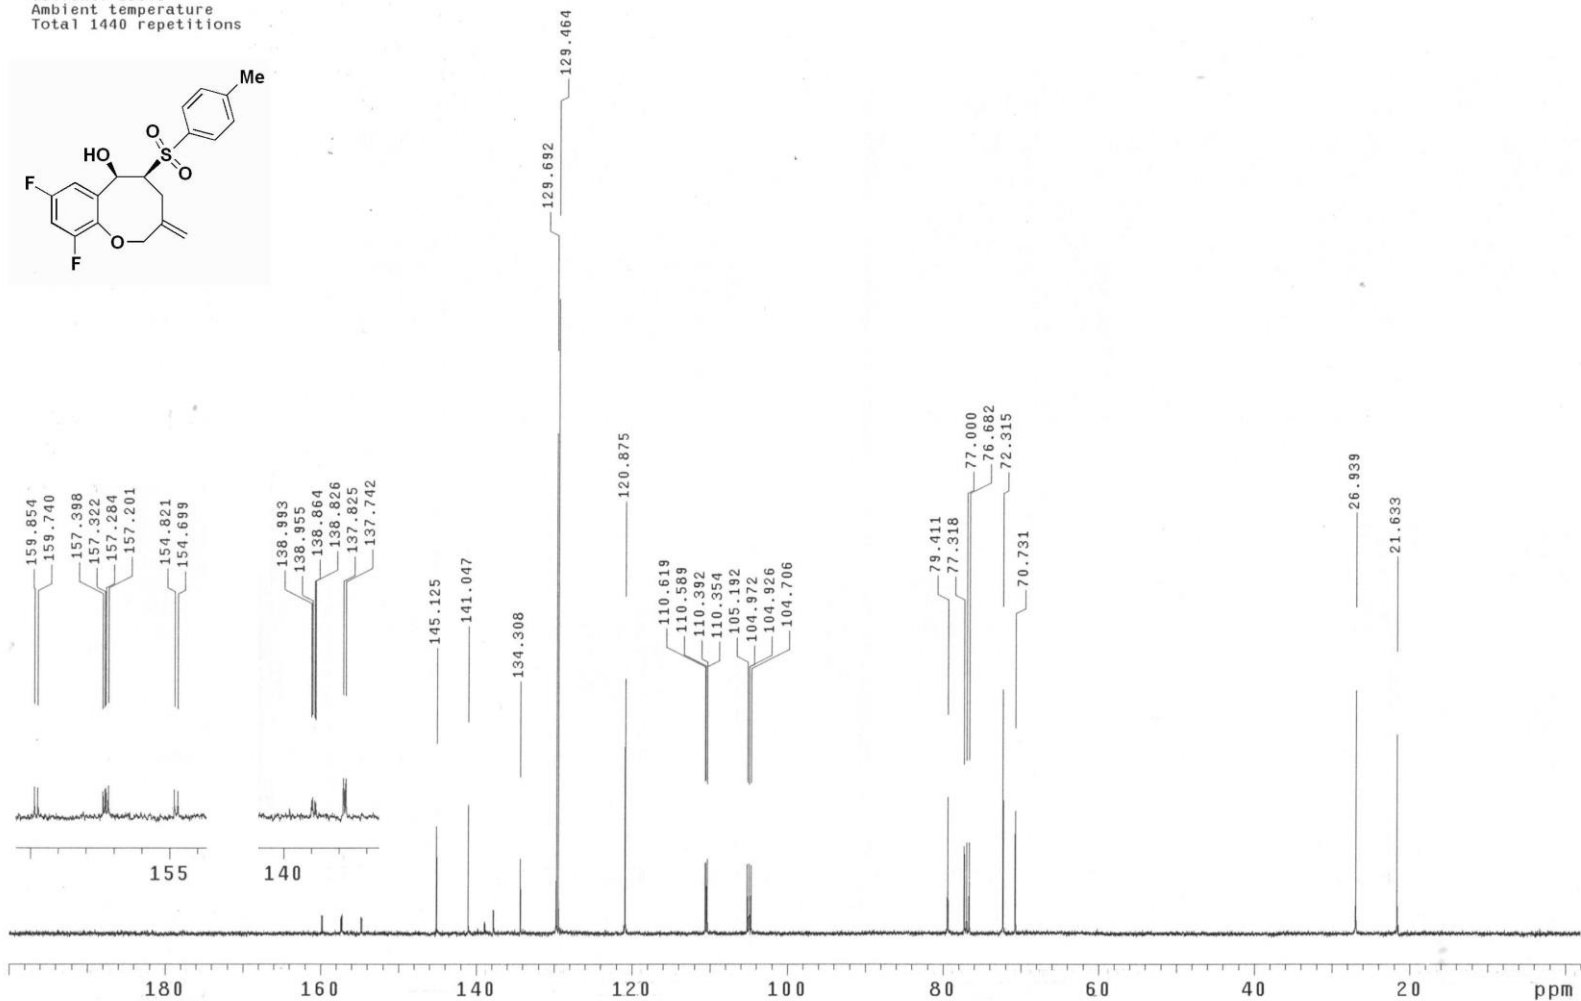

# Compound 5u (<sup>1</sup>H-NMR spectral data)

NC0102NB

Pulse Sequence: s2pu1  
UNITYplus-400 "unity400"  
Date: Jan 31 2020  
Solvent: CDCl<sub>3</sub>  
Ambient temperature  
Total 64 repetitions

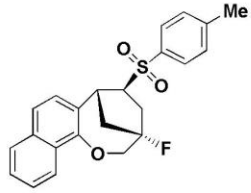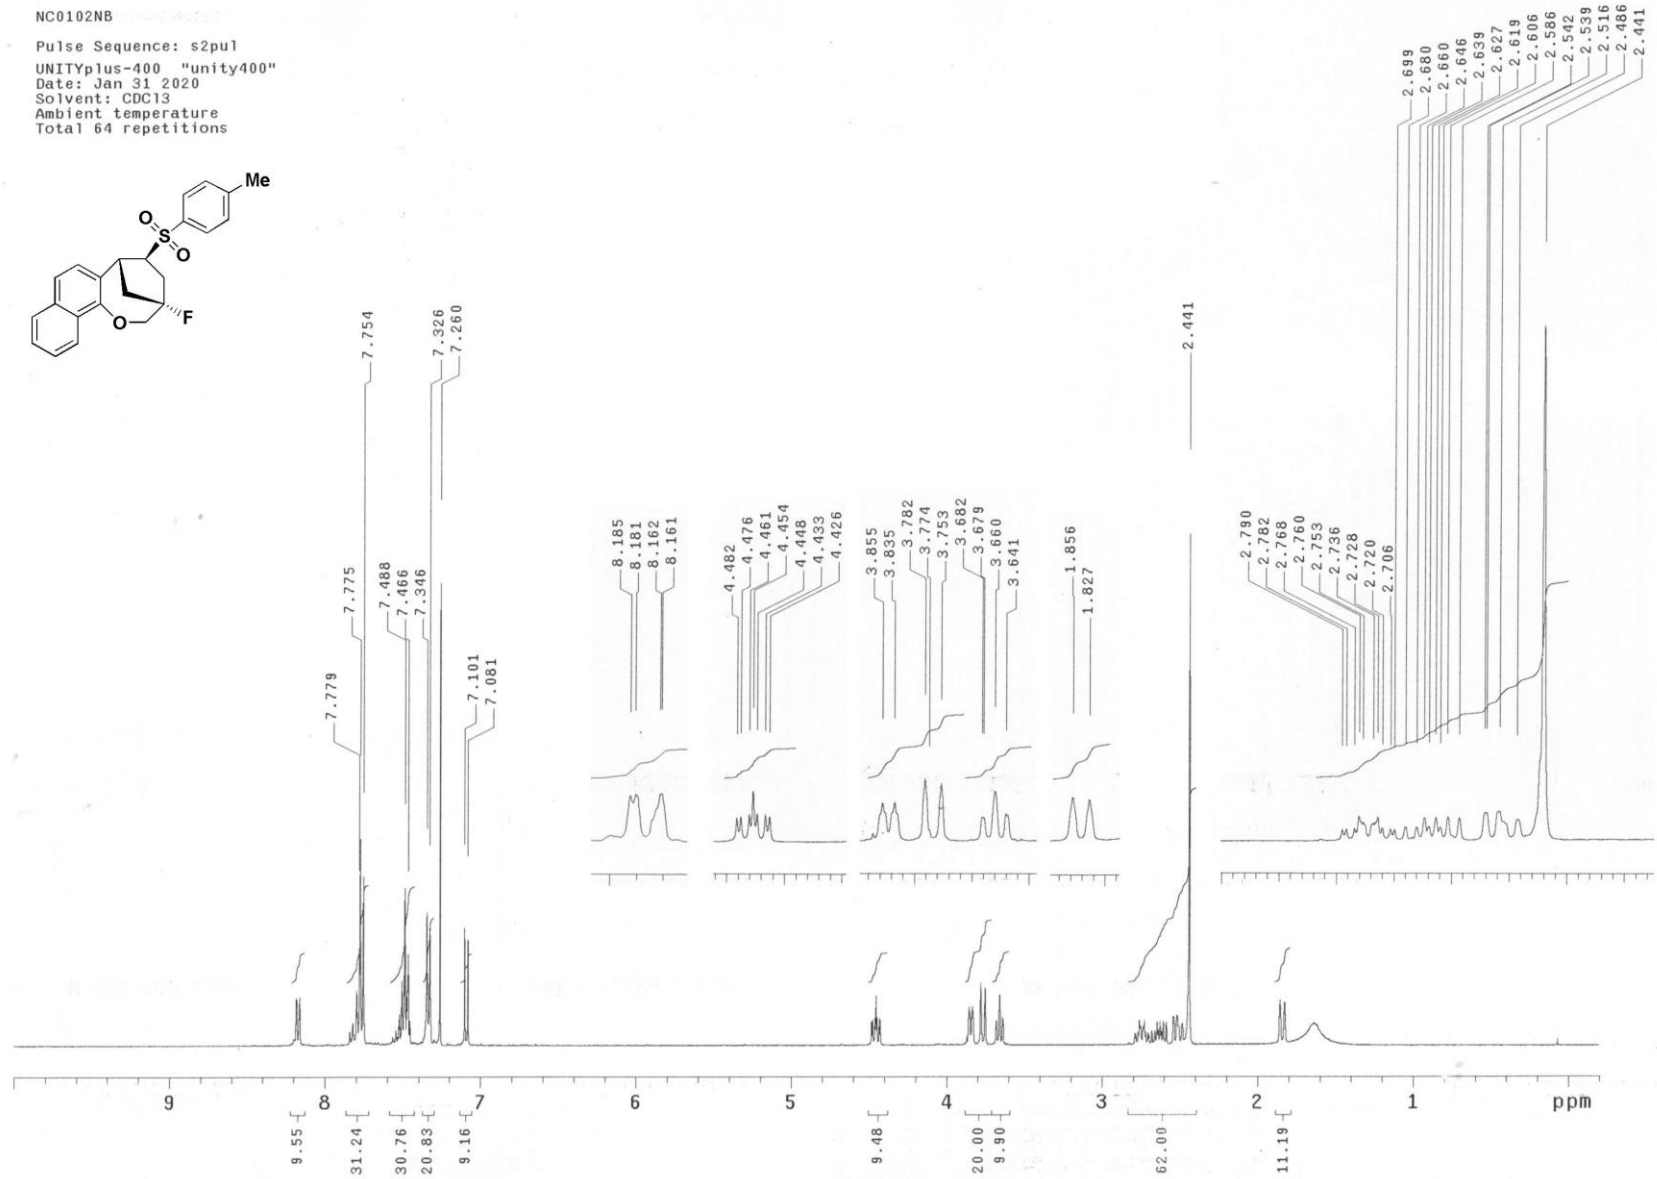

# Compound 5u (<sup>13</sup>C-NMR spectral data)

NC0102NB

Pulse Sequence: s2pu1  
UNITYplus-400 "unity400"  
Date: Jan 31 2020  
Solvent: CDC13  
Ambient temperature  
Total 6720 repetitions

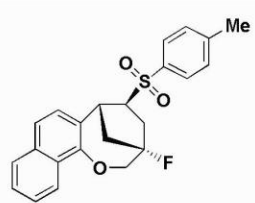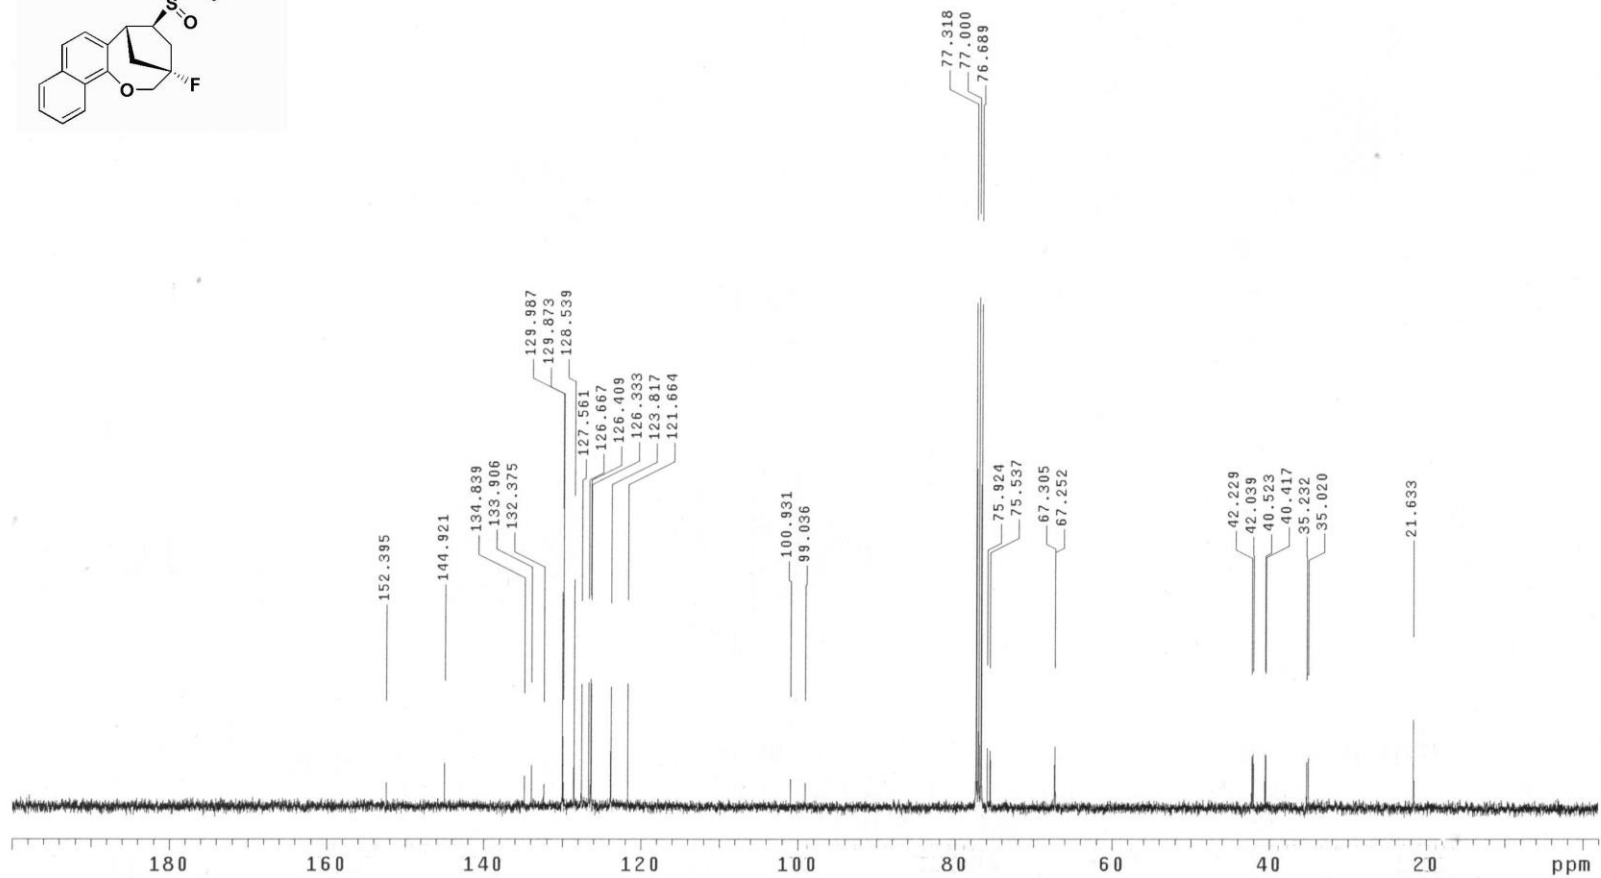

# Compound 5v (<sup>1</sup>H-NMR spectral data)

NC0204NB

Pulse Sequence: s2pu1

UNITYplus-400 "unity400"

Date: Mar 13 2020

Solvent: CDC13

Ambient temperature

Total 32 repetitions

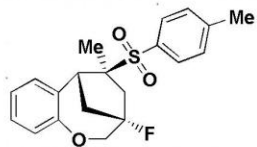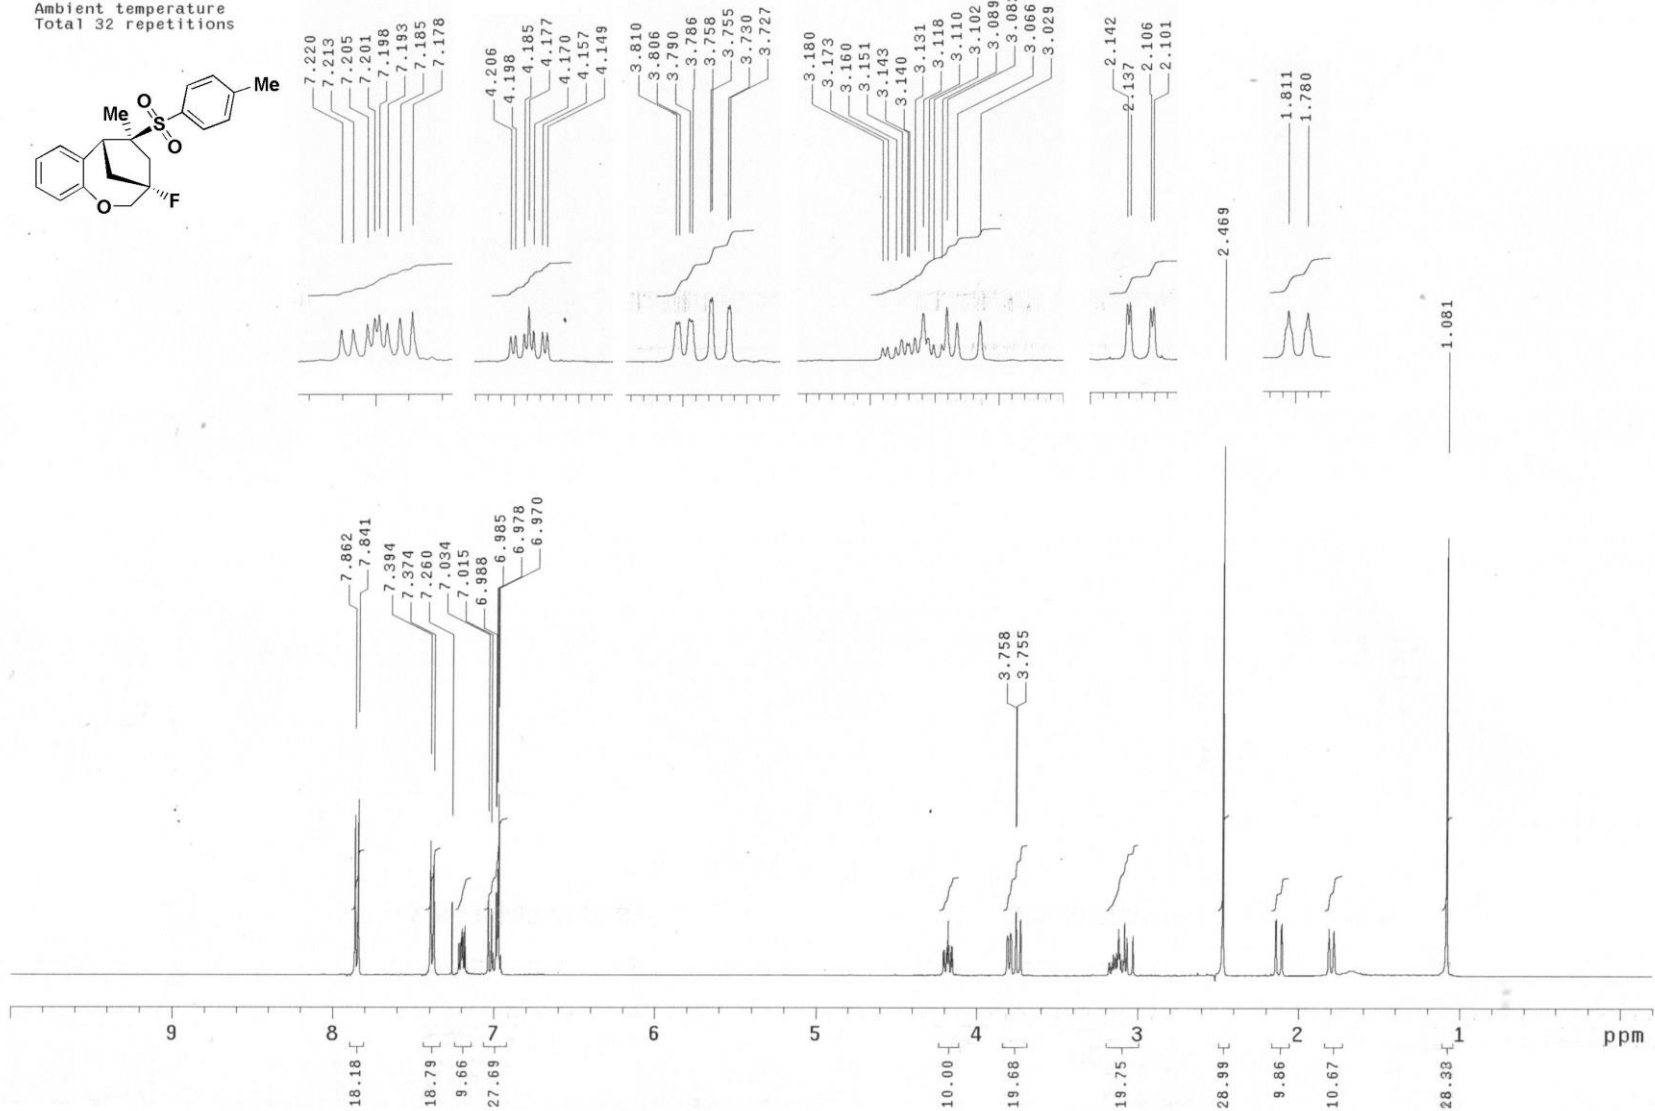

# Compound 5v (<sup>13</sup>C-NMR spectral data)

NC0204NB

Pulse Sequence: s2pu1  
UNITYplus-400 "unity400"  
Date: Mar 13 2020  
Solvent: CDC13  
Ambient temperature  
Total 2640 repetitions

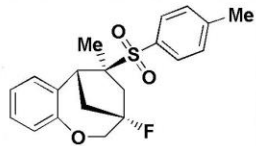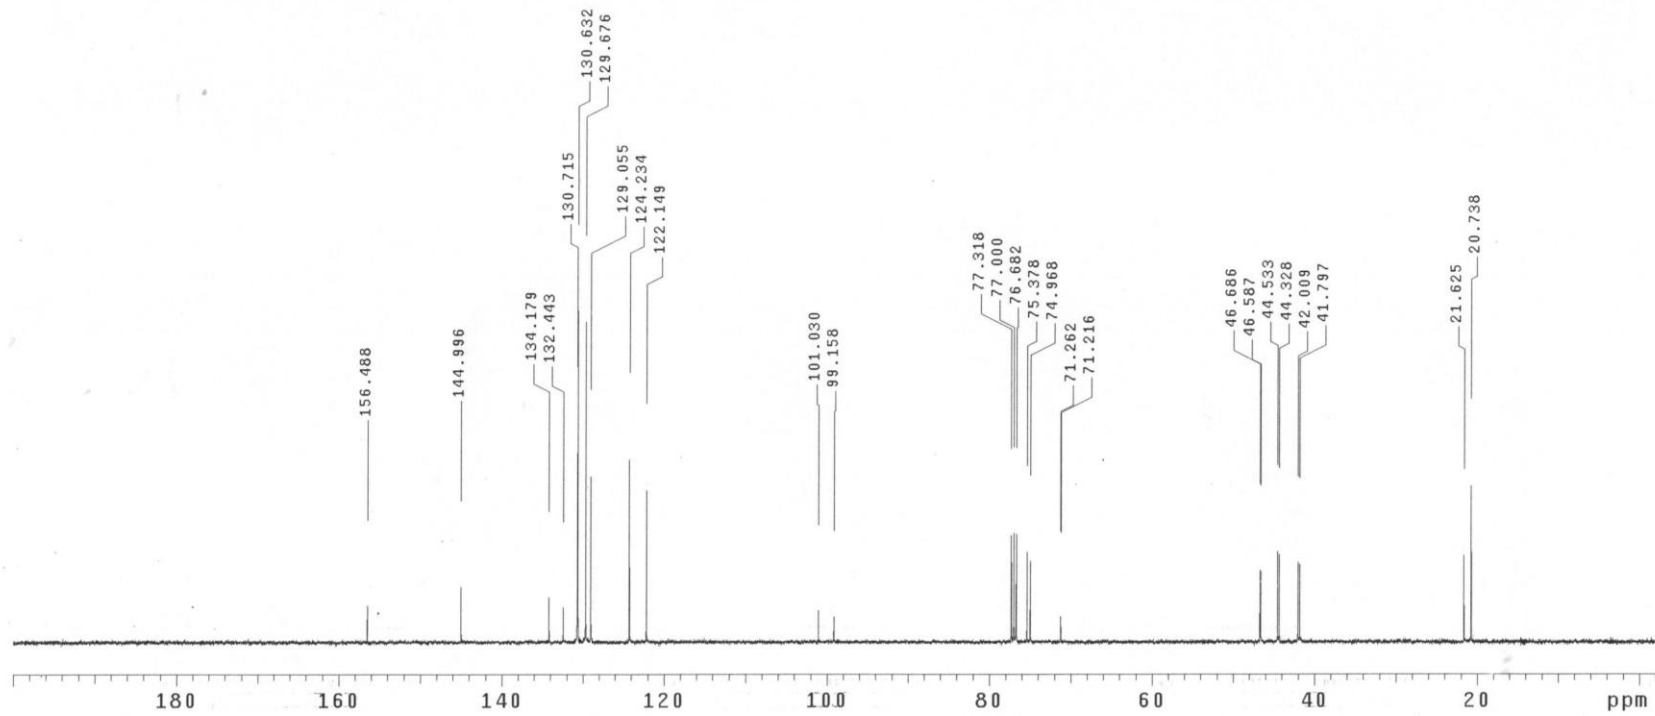

# Compound 5y (<sup>1</sup>H-NMR spectral data)

NC27-28

Pulse Sequence: s2pu1

UNITYplus-400 "unity400"

Date: Apr 13 2020

Solvent: CDCl<sub>3</sub>

Ambient temperature

Total 32 repetitions

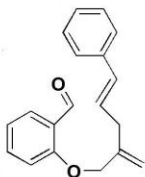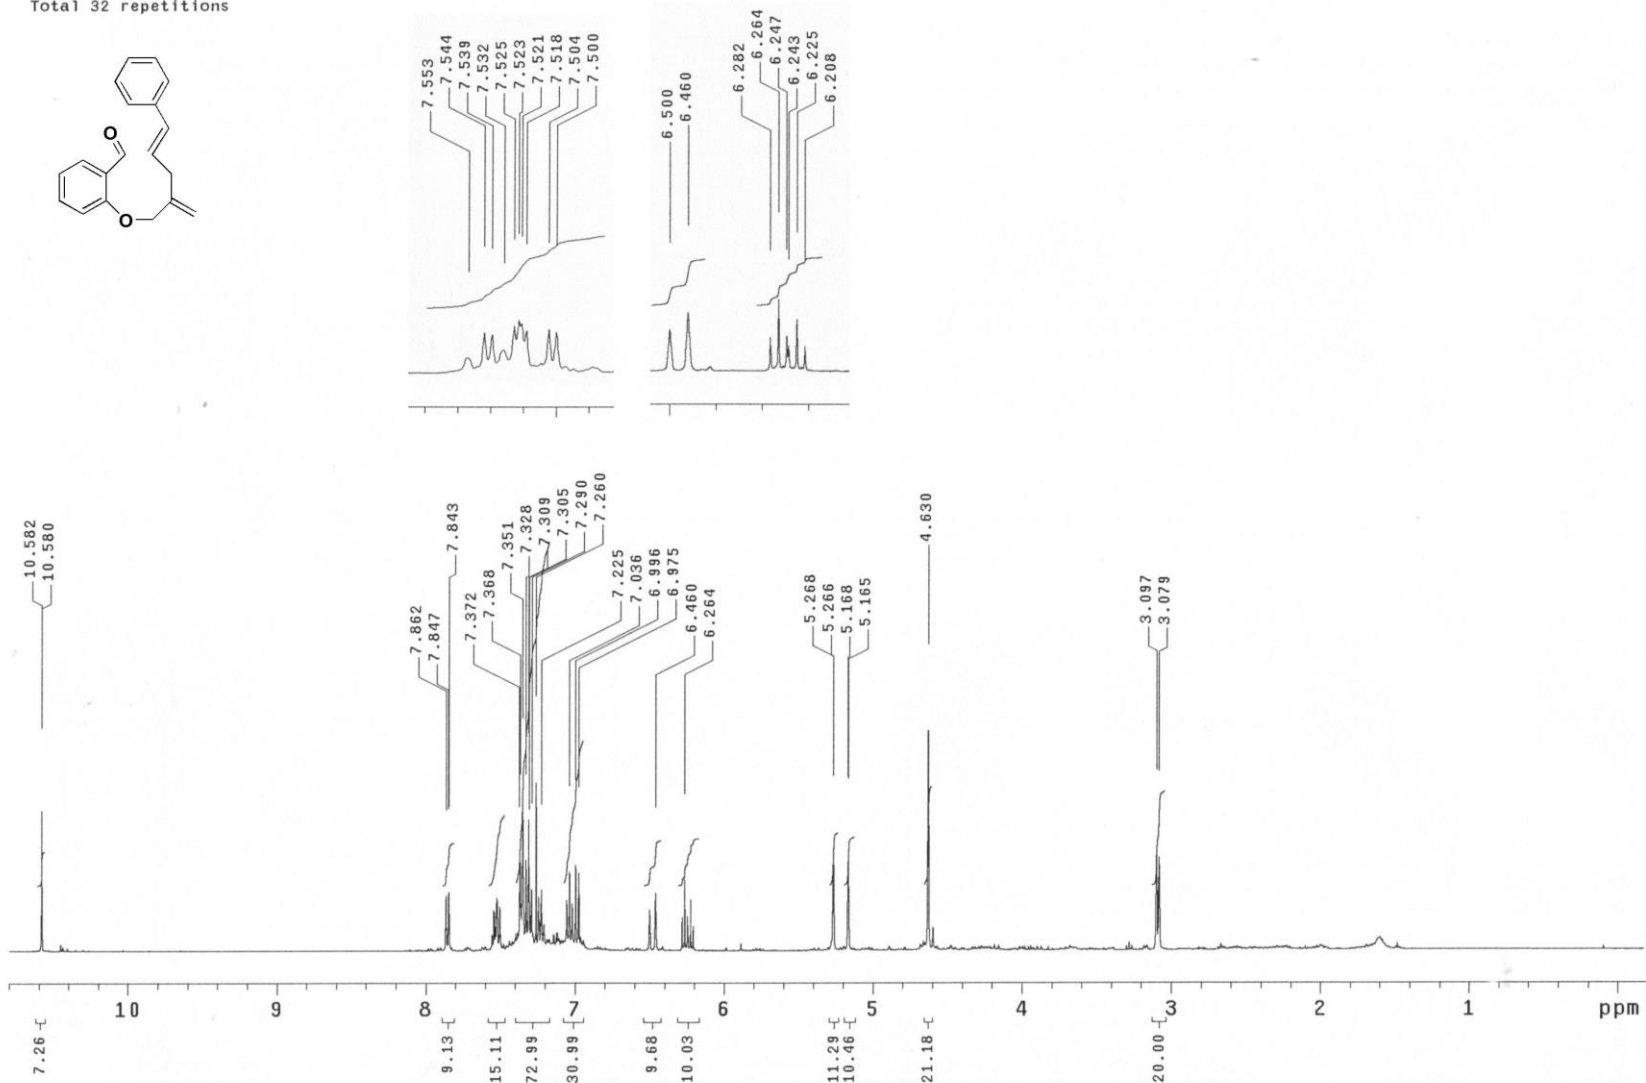

# Compound 5y (<sup>13</sup>C-NMR spectral data)

NC27-28

Pulse Sequence: s2pu1  
UNITYplus-400 "unity400"  
Date: Apr 13 2020  
Solvent: CDCl<sub>3</sub>  
Ambient temperature  
Total 9248 repetitions

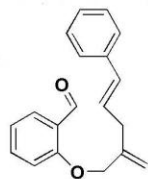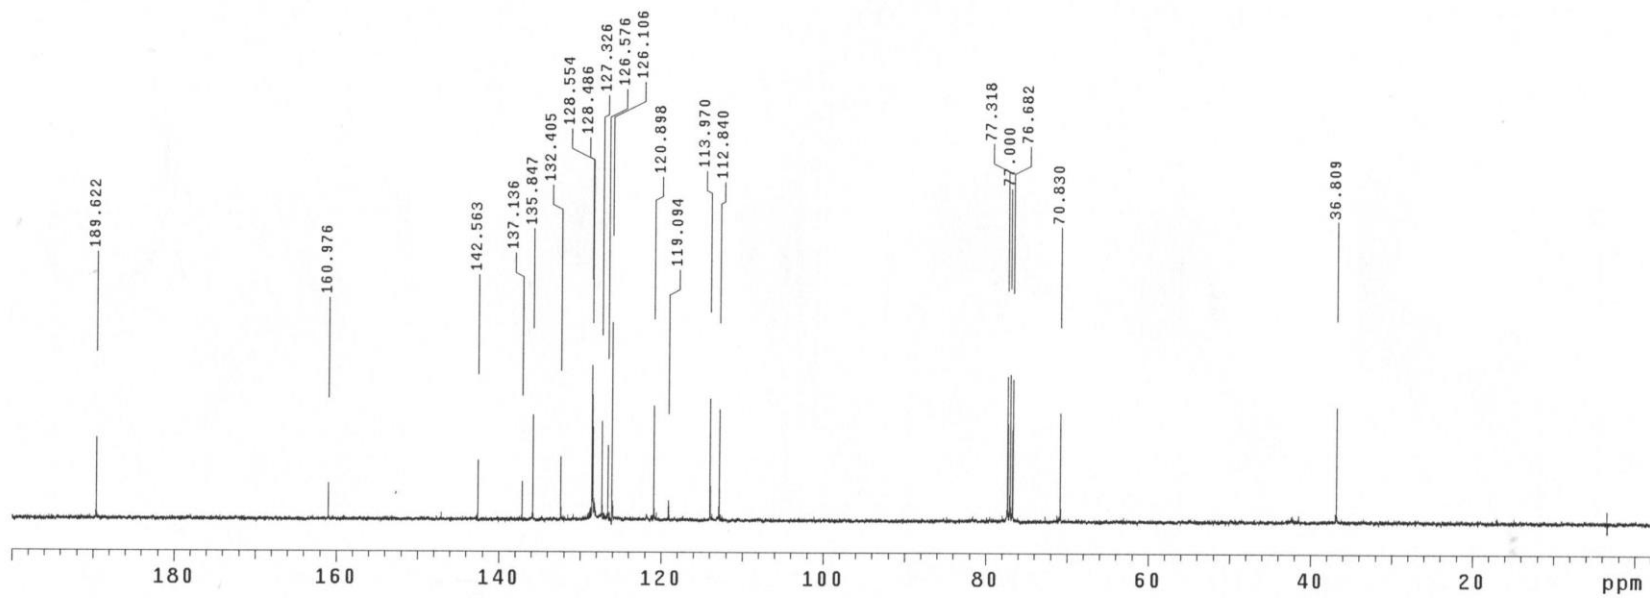

# Compound 7a (<sup>1</sup>H-NMR spectral data)

NC1217NBF

Pulse Sequence: s2pu1

UNITYplus-400 "unity400"

Date: Feb 20 2020

Solvent: CDC13

Ambient temperature

Total 32 repetitions

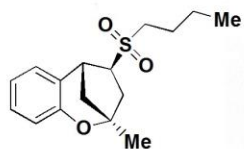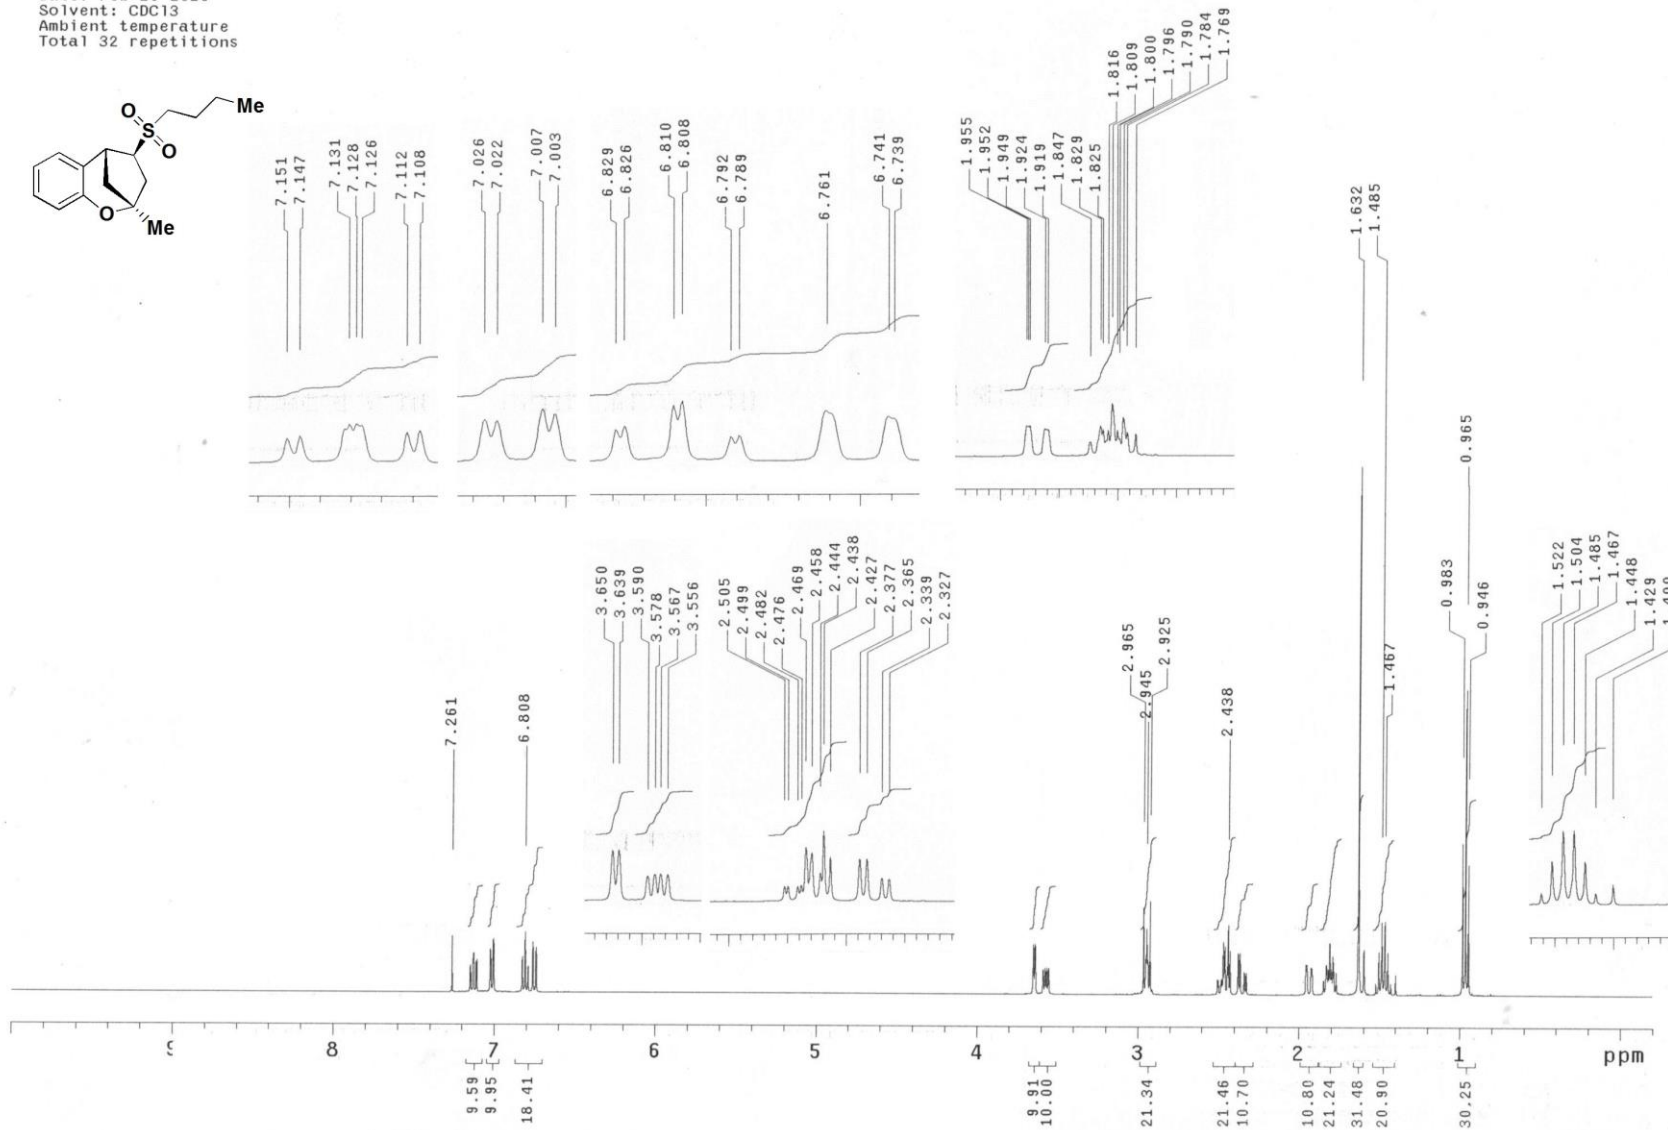



# Compound 7a (<sup>13</sup>C-NMR spectral data)

NC1217NBF

Pulse Sequence: s2pu1

UNITYplus-400 "unity400"

Date: Feb 20 2020

Solvent: CDC13

Ambient temperature

Total 1248 repetitions

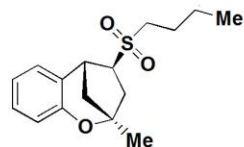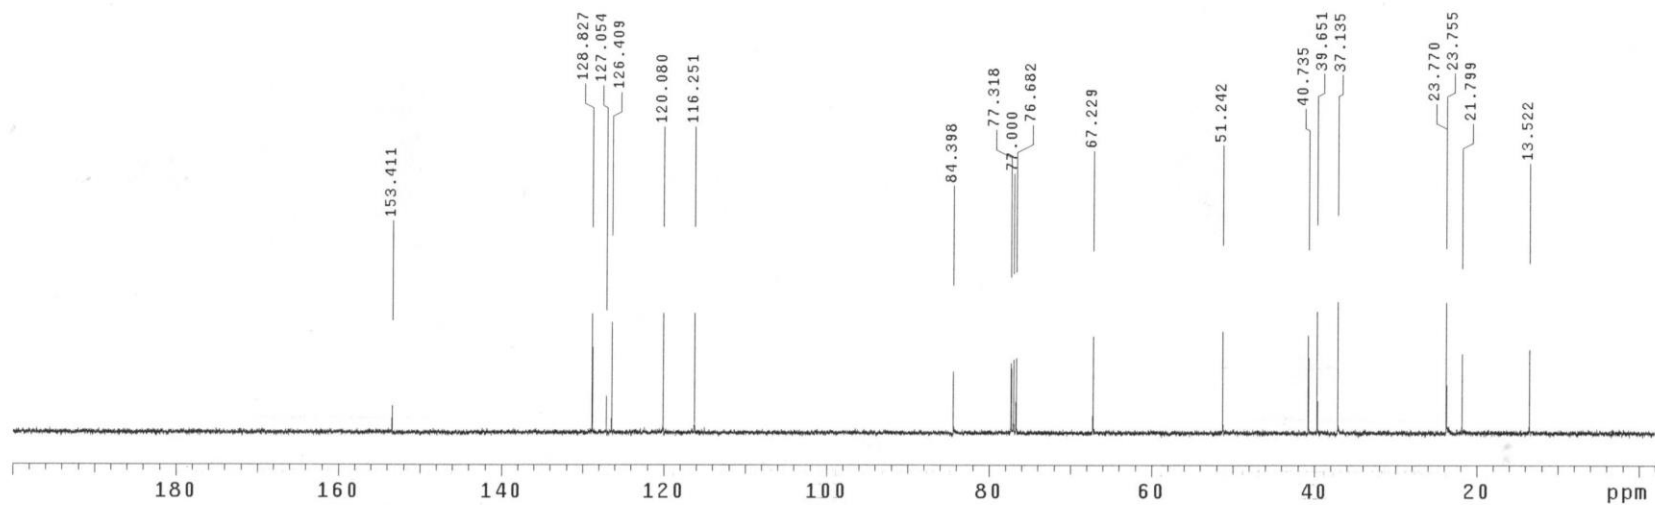

# Compound 7b (<sup>1</sup>H-NMR spectral data)

NC1202NB

Pulse Sequence: s2pu1  
 UNITYplus-400 "unity400"  
 Date: Dec 18 2019  
 Solvent: CDCl<sub>3</sub>  
 Ambient temperature  
 Total 32 repetitions

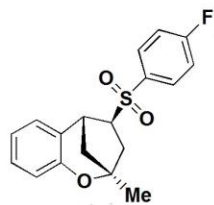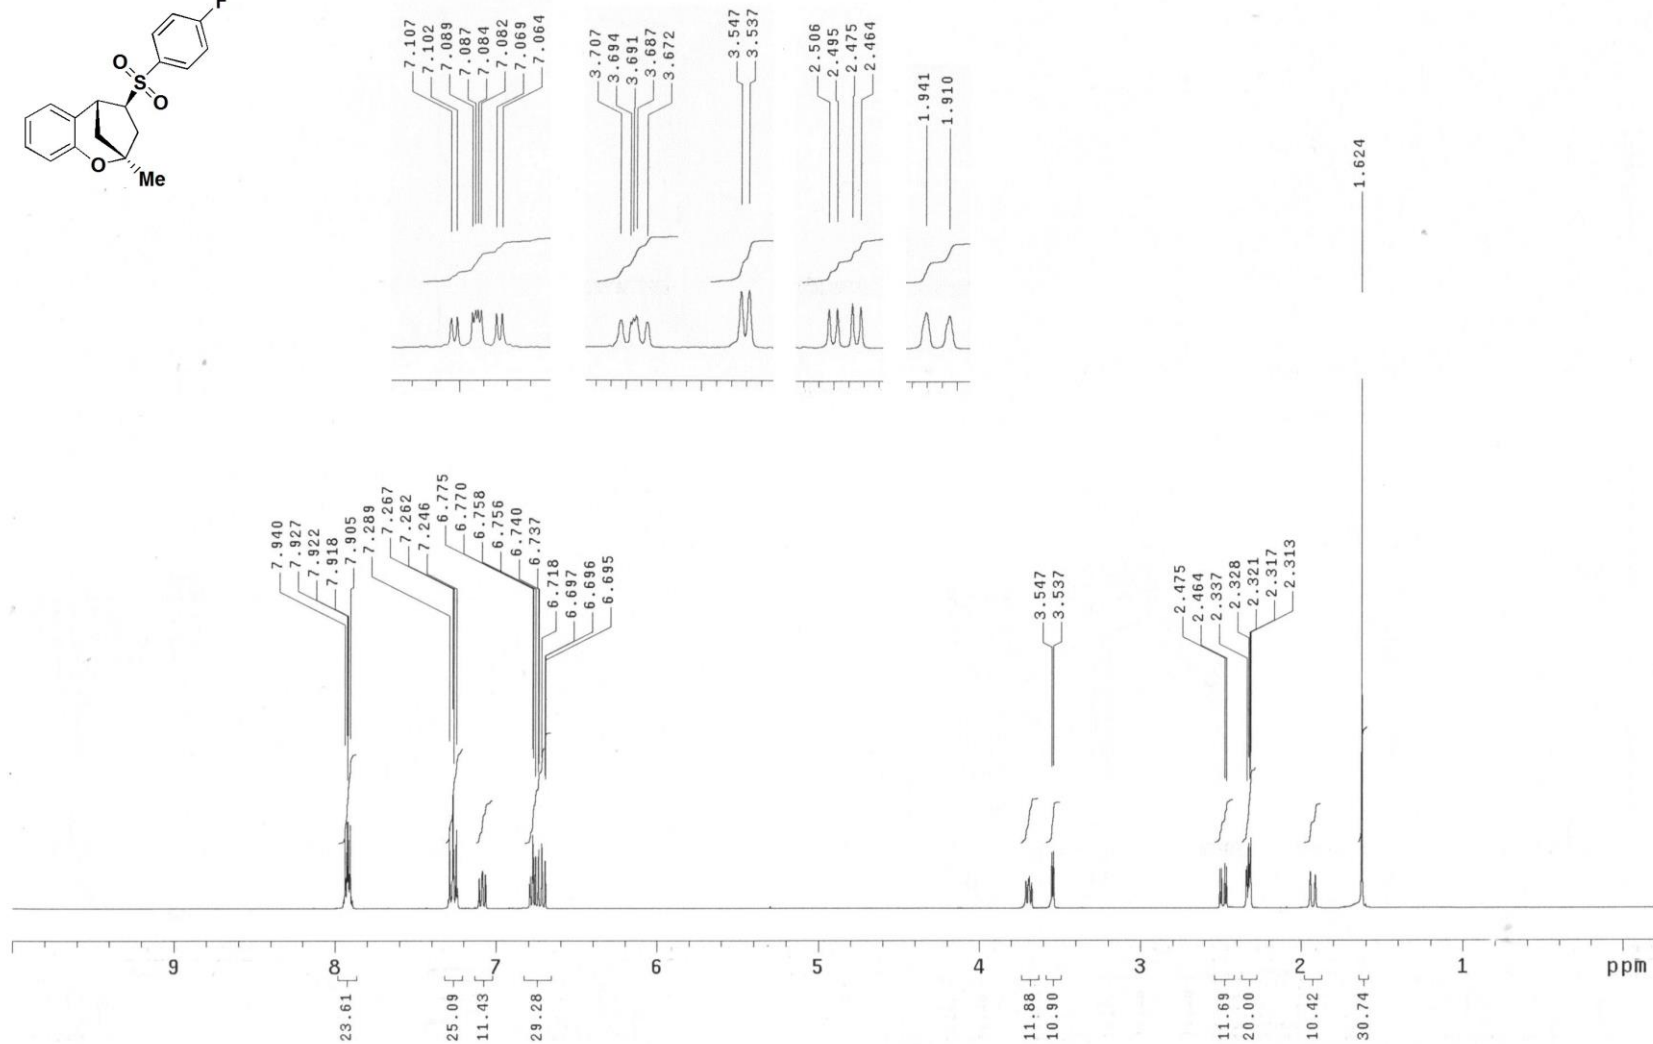

# Compound 7b (<sup>13</sup>C-NMR spectral data)

NC1202NB

Pulse Sequence: s2pu1  
UNITYplus-400 "unity400"  
Date: Dec 18 2019  
Solvent: CDCl<sub>3</sub>  
Ambient temperature  
Total 1520 repetitions

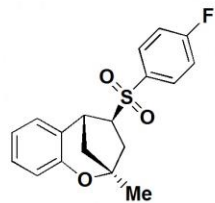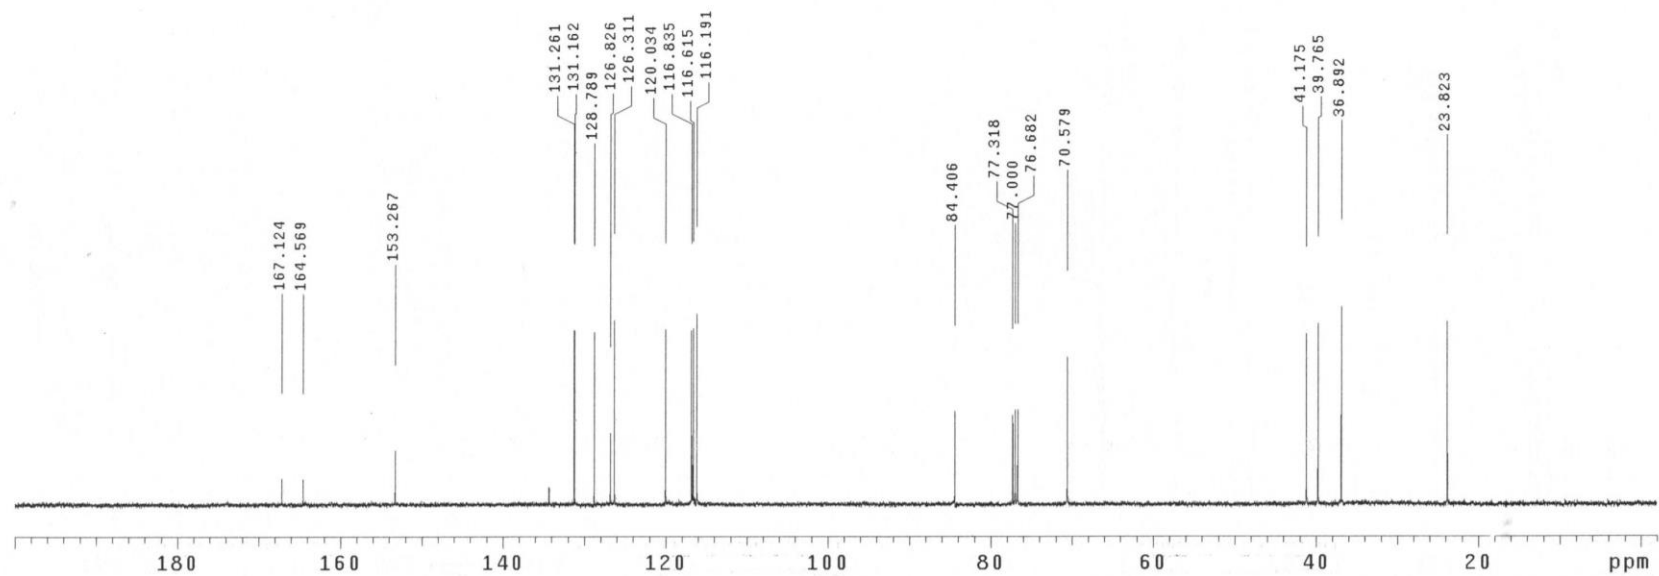

# Compound 9 (<sup>1</sup>H-NMR spectral data)

NC0527C1

Pulse Sequence: s2pu1

UNITYplus-400 "unity400"

Date: May 27 2020

Solvent: CDCl<sub>3</sub>

Ambient temperature

Total 32 repetitions

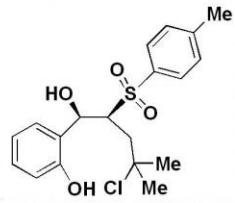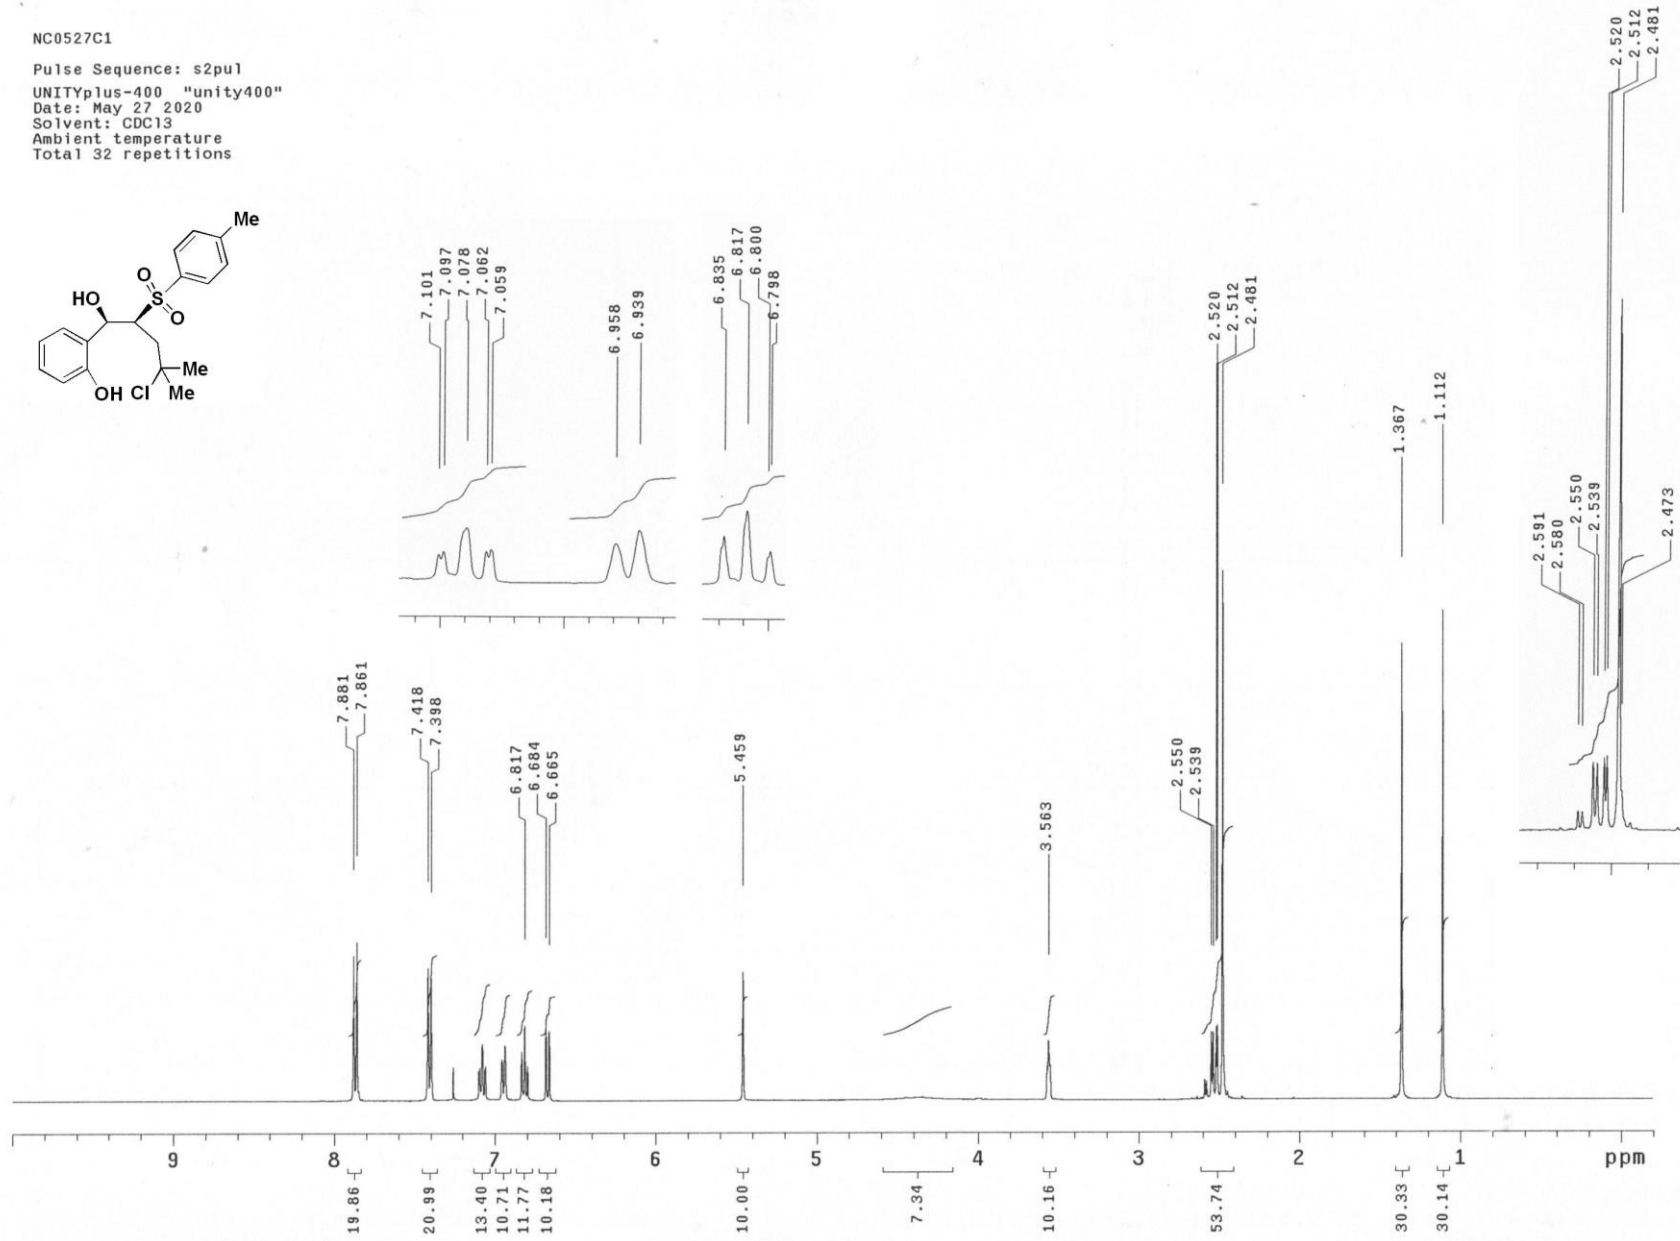

# Compound 9 (<sup>13</sup>C-NMR spectral data)

NC0527C1

Pulse Sequence: s2pu1

UNITYplus-400 "unity400"

Date: May 27 2020

Solvent: CDC13

Ambient temperature

Total 672 repetitions

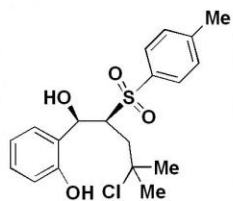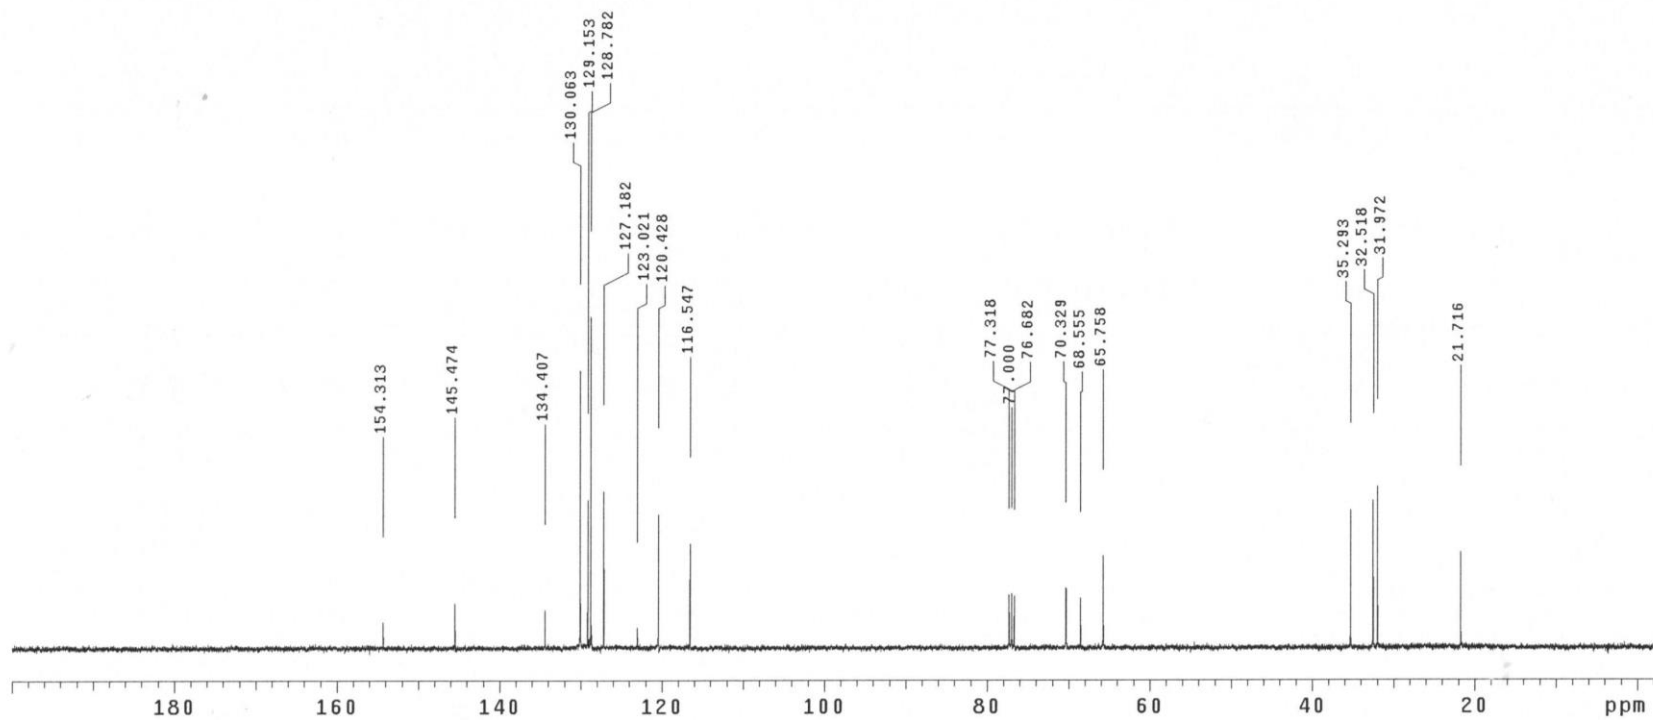

## X-ray crystal data of compound 4I (CCDC 2003255)

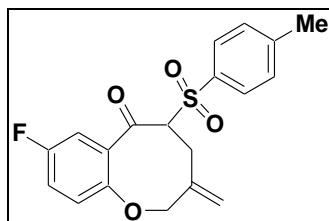

**Sample preparation** : A solution of compound **4I** (30 mg) in CH<sub>2</sub>Cl<sub>2</sub> (10 mL) was placed in a tube (10 mL). EtOAc (2 mL) was added slowly to the vial with a dropper. The vial was closed with little cotton and kept at room temperature for 2 days. Then, colorless prisms were observed.

**Crystal measurement** : X-ray crystal structures were determined with a Bruker Enraf-Nonius single-crystal diffractometer (CAD4, Kappa CCD). Thermal ellipsoids are drawn at 50% probability level.

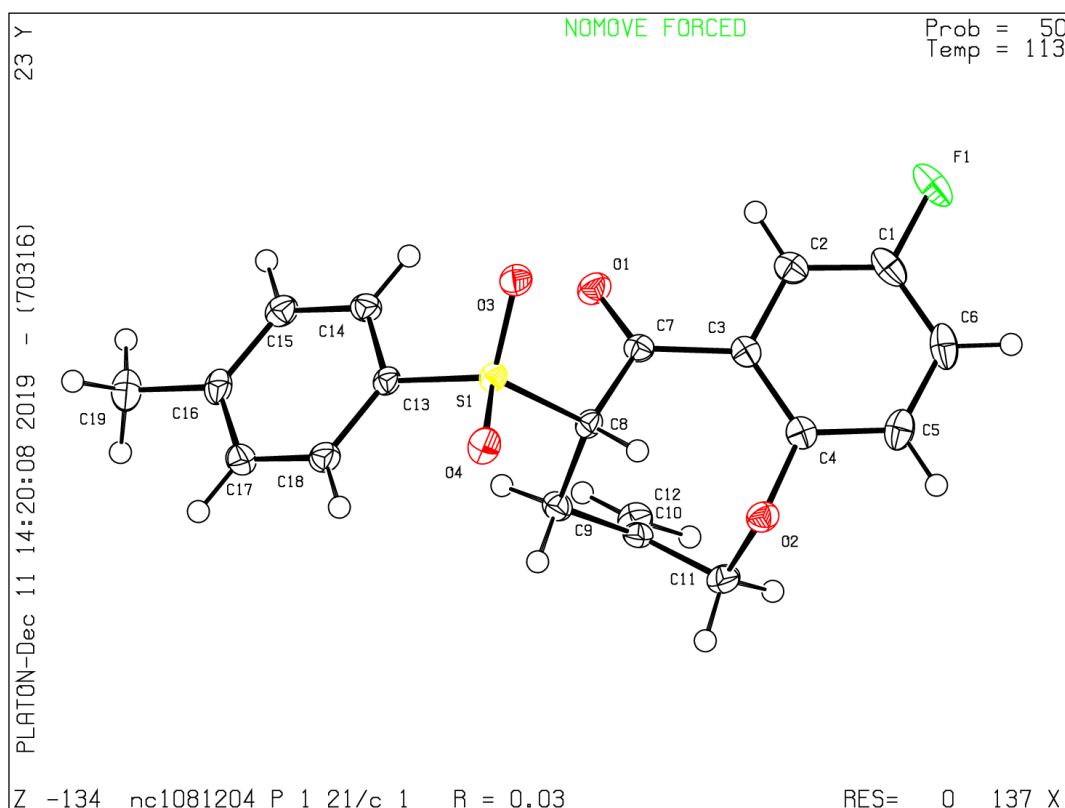

|                                   |                                                    |                 |
|-----------------------------------|----------------------------------------------------|-----------------|
| Empirical formula                 | C <sub>19</sub> H <sub>17</sub> F O <sub>4</sub> S |                 |
| Formula weight                    | 360.38                                             |                 |
| Temperature                       | 113(2) K                                           |                 |
| Wavelength                        | 0.71073 Å                                          |                 |
| Crystal system                    | Monoclinic                                         |                 |
| Space group                       | P 1 21/c 1                                         |                 |
| Unit cell dimensions              | a = 9.0958(2) Å                                    | α = 90°.        |
|                                   | b = 11.0238(3) Å                                   | β = 98.035(2)°. |
|                                   | c = 16.3016(3) Å                                   | γ = 90°.        |
| Volume                            | 1618.52(6) Å <sup>3</sup>                          |                 |
| Z                                 | 4                                                  |                 |
| Density (calculated)              | 1.479 Mg/m <sup>3</sup>                            |                 |
| Absorption coefficient            | 0.233 mm <sup>-1</sup>                             |                 |
| F(000)                            | 752                                                |                 |
| Crystal size                      | 0.25 x 0.2 x 0.1 mm <sup>3</sup>                   |                 |
| Theta range for data collection   | 2.237 to 26.990°.                                  |                 |
| Index ranges                      | -11<=h<=11, -13<=k<=14, -20<=l<=20                 |                 |
| Reflections collected             | 16444                                              |                 |
| Independent reflections           | 3383 [R(int) = 0.0259]                             |                 |
| Completeness to theta = 25.242°   | 100.0 %                                            |                 |
| Absorption correction             | Semi-empirical from equivalents                    |                 |
| Max. and min. transmission        | 1.00000 and 0.47803                                |                 |
| Refinement method                 | Full-matrix least-squares on F <sup>2</sup>        |                 |
| Data / restraints / parameters    | 3383 / 0 / 235                                     |                 |
| Goodness-of-fit on F <sup>2</sup> | 1.037                                              |                 |
| Final R indices [I>2sigma(I)]     | R1 = 0.0332, wR2 = 0.0755                          |                 |
| R indices (all data)              | R1 = 0.0415, wR2 = 0.0783                          |                 |
| Extinction coefficient            | n/a                                                |                 |
| Largest diff. peak and hole       | 0.333 and -0.384 e.Å <sup>-3</sup>                 |                 |

## X-ray crystal data of compound 5d (CCDC 2003256)

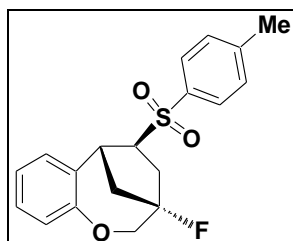

**Sample preparation** : A solution of compound **5d** (30 mg) in CH<sub>2</sub>Cl<sub>2</sub> (10 mL) was placed in a tube (10 mL). EtOAc (2 mL) was added slowly to the vial with a dropper. The vial was closed with little cotton and kept at room temperature for 2 days. Then, colorless prisms were observed.

**Crystal measurement** : X-ray crystal structures were determined with a Bruker Enraf-Nonius single-crystal diffractometer (CAD4, Kappa CCD). Thermal ellipsoids are drawn at 50% probability level.

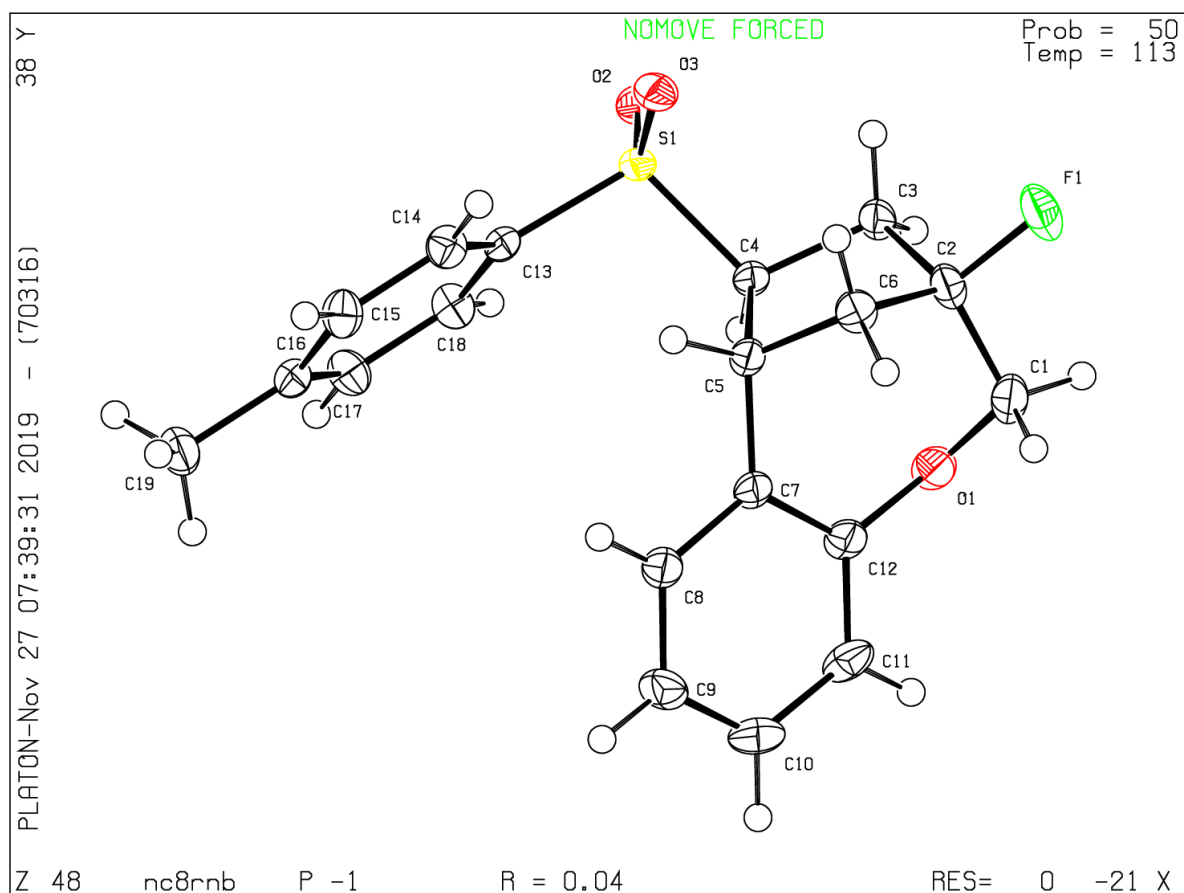



|                                   |                                                    |                 |
|-----------------------------------|----------------------------------------------------|-----------------|
| Empirical formula                 | C <sub>19</sub> H <sub>19</sub> F O <sub>3</sub> S |                 |
| Formula weight                    | 346.40                                             |                 |
| Temperature                       | 113(2) K                                           |                 |
| Wavelength                        | 0.71073 Å                                          |                 |
| Crystal system                    | Triclinic                                          |                 |
| Space group                       | P-1                                                |                 |
| Unit cell dimensions              | a = 8.1798(3) Å                                    | α = 88.093(4)°. |
|                                   | b = 8.2382(4) Å                                    | β = 81.665(4)°. |
|                                   | c = 12.9438(7) Å                                   | γ = 73.510(4)°. |
| Volume                            | 827.50(7) Å <sup>3</sup>                           |                 |
| Z                                 | 2                                                  |                 |
| Density (calculated)              | 1.390 Mg/m <sup>3</sup>                            |                 |
| Absorption coefficient            | 0.220 mm <sup>-1</sup>                             |                 |
| F(000)                            | 364                                                |                 |
| Crystal size                      | 0.3 x 0.25 x 0.25 mm <sup>3</sup>                  |                 |
| Theta range for data collection   | 2.578 to 27.055°.                                  |                 |
| Index ranges                      | -10 ≤ h ≤ 10, -10 ≤ k ≤ 7, -16 ≤ l ≤ 16            |                 |
| Reflections collected             | 12519                                              |                 |
| Independent reflections           | 3425 [R(int) = 0.0379]                             |                 |
| Completeness to theta = 25.242°   | 99.7 %                                             |                 |
| Absorption correction             | Semi-empirical from equivalents                    |                 |
| Max. and min. transmission        | 1.00000 and 0.56378                                |                 |
| Refinement method                 | Full-matrix least-squares on F <sup>2</sup>        |                 |
| Data / restraints / parameters    | 3425 / 0 / 219                                     |                 |
| Goodness-of-fit on F <sup>2</sup> | 1.060                                              |                 |
| Final R indices [I > 2σ(I)]       | R1 = 0.0375, wR2 = 0.0928                          |                 |
| R indices (all data)              | R1 = 0.0459, wR2 = 0.0971                          |                 |
| Extinction coefficient            | 0.009(2)                                           |                 |
| Largest diff. peak and hole       | 0.300 and -0.426 e.Å <sup>-3</sup>                 |                 |

## X-ray crystal data of compound 5j (CCDC 2003257)

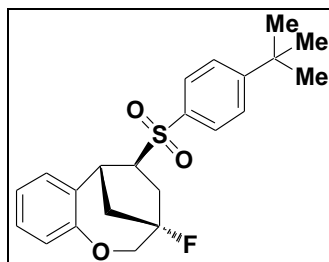

**Sample preparation** : A solution of compound **5j** (30 mg) in CH<sub>2</sub>Cl<sub>2</sub> (10 mL) was placed in a tube (10 mL). EtOAc (2 mL) was added slowly to the vial with a dropper. The vial was closed with little cotton and kept at room temperature for 2 days. Then, colorless prisms were observed.

**Crystal measurement** : X-ray crystal structures were determined with a Bruker Enraf-Nonius single-crystal diffractometer (CAD4, Kappa CCD). Thermal ellipsoids are drawn at 50% probability level.

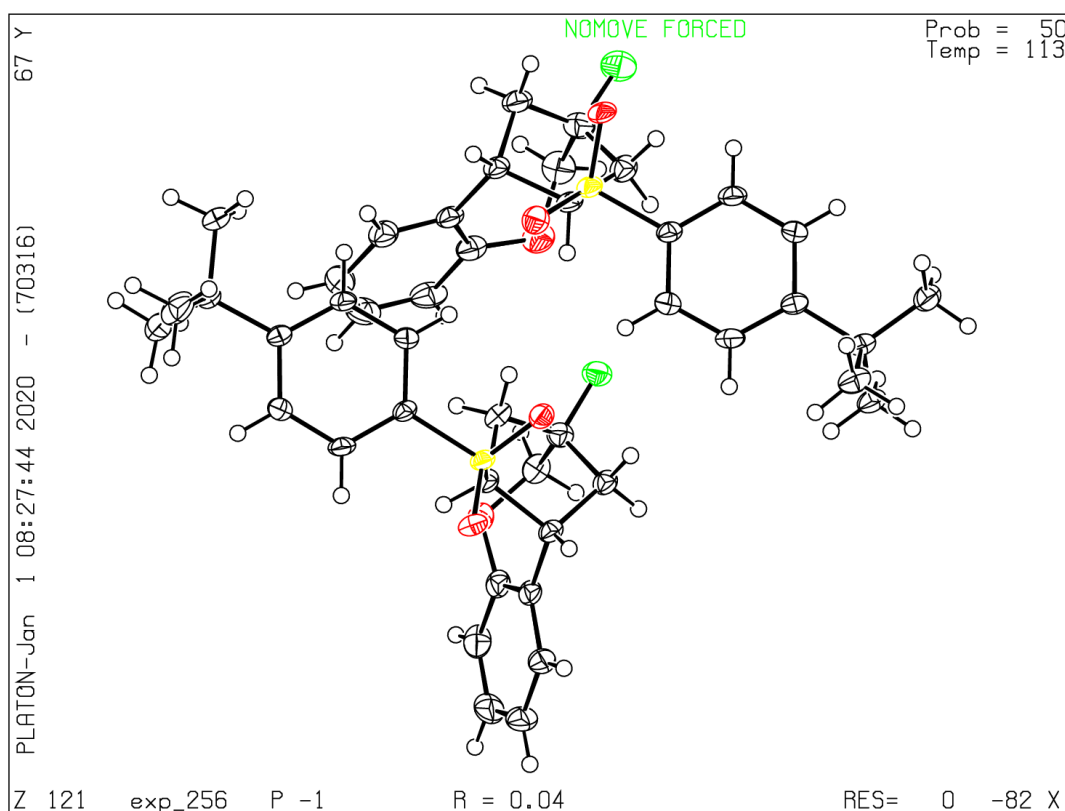

|                                   |                                             |                               |
|-----------------------------------|---------------------------------------------|-------------------------------|
| Formula weight                    | 194.24                                      |                               |
| Temperature                       | 113(2) K                                    |                               |
| Wavelength                        | 0.71073 Å                                   |                               |
| Crystal system                    | Triclinic                                   |                               |
| Space group                       | P-1                                         |                               |
| Unit cell dimensions              | a = 10.5216(3) Å                            | $\alpha = 114.737(2)^\circ$ . |
|                                   | b = 14.9812(4) Å                            | $\beta = 100.424(2)^\circ$ .  |
|                                   | c = 15.0603(3) Å                            | $\gamma = 104.503(2)^\circ$ . |
| Volume                            | 1974.08(9) Å <sup>3</sup>                   |                               |
| Z                                 | 8                                           |                               |
| Density (calculated)              | 1.307 Mg/m <sup>3</sup>                     |                               |
| Absorption coefficient            | 0.192 mm <sup>-1</sup>                      |                               |
| F(000)                            | 824                                         |                               |
| Crystal size                      | 0.2 x 0.2 x 0.15 mm <sup>3</sup>            |                               |
| Theta range for data collection   | 2.114 to 27.076°.                           |                               |
| Index ranges                      | -13<=h<=13, -18<=k<=19, -19<=l<=19          |                               |
| Reflections collected             | 33783                                       |                               |
| Independent reflections           | 8215 [R(int) = 0.0422]                      |                               |
| Completeness to theta = 25.242°   | 99.7 %                                      |                               |
| Absorption correction             | Semi-empirical from equivalents             |                               |
| Max. and min. transmission        | 1.00000 and 0.57917                         |                               |
| Refinement method                 | Full-matrix least-squares on F <sup>2</sup> |                               |
| Data / restraints / parameters    | 8215 / 0 / 493                              |                               |
| Goodness-of-fit on F <sup>2</sup> | 1.079                                       |                               |
| Final R indices [I>2sigma(I)]     | R1 = 0.0432, wR2 = 0.1083                   |                               |
| R indices (all data)              | R1 = 0.0626, wR2 = 0.1150                   |                               |
| Extinction coefficient            | n/a                                         |                               |
| Largest diff. peak and hole       | 0.463 and -0.462 e.Å <sup>-3</sup>          |                               |

## X-ray crystal data of compound 5I (CCDC 2003258)

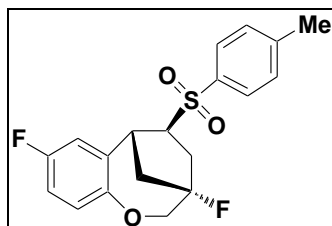

**Sample preparation** : A solution of compound **5I** (30 mg) in CH<sub>2</sub>Cl<sub>2</sub> (10 mL) was placed in a tube (10 mL). EtOAc (2 mL) was added slowly to the vial with a dropper. The vial was closed with little cotton and kept at room temperature for 2 days. Then, colorless prisms were observed.

**Crystal measurement** : X-ray crystal structures were determined with a Bruker Enraf-Nonius single-crystal diffractometer (CAD4, Kappa CCD). Thermal ellipsoids are drawn at 50% probability level.

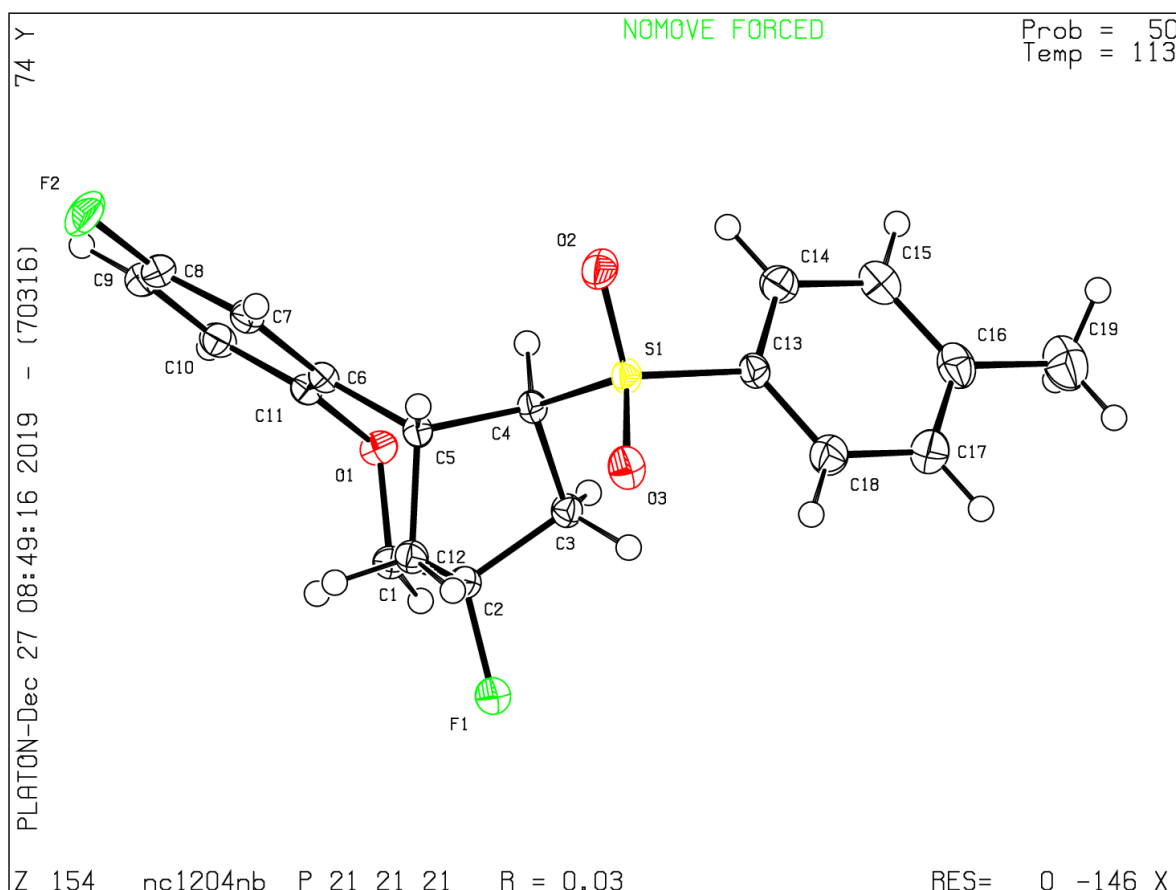

|                                   |                                                                                                    |
|-----------------------------------|----------------------------------------------------------------------------------------------------|
| Empirical formula                 | C <sub>19</sub> H <sub>18</sub> F <sub>2</sub> O <sub>3</sub> S                                    |
| Formula weight                    | 364.39                                                                                             |
| Temperature                       | 113(2) K                                                                                           |
| Wavelength                        | 0.71073 Å                                                                                          |
| Crystal system                    | Orthorhombic                                                                                       |
| Space group                       | P2 <sub>1</sub> 2 <sub>1</sub> 2 <sub>1</sub>                                                      |
| Unit cell dimensions              | a = 5.88630(10) Å      α = 90°.<br>b = 9.4890(2) Å      β = 90°.<br>c = 29.6414(7) Å      γ = 90°. |
| Volume                            | 1655.62(6) Å <sup>3</sup>                                                                          |
| Z                                 | 4                                                                                                  |
| Density (calculated)              | 1.462 Mg/m <sup>3</sup>                                                                            |
| Absorption coefficient            | 0.232 mm <sup>-1</sup>                                                                             |
| F(000)                            | 760                                                                                                |
| Crystal size                      | 0.25 x 0.25 x 0.2 mm <sup>3</sup>                                                                  |
| Theta range for data collection   | 2.254 to 27.000°.                                                                                  |
| Index ranges                      | -7 ≤ h ≤ 7, -12 ≤ k ≤ 12, -33 ≤ l ≤ 37                                                             |
| Reflections collected             | 31130                                                                                              |
| Independent reflections           | 3504 [R(int) = 0.0346]                                                                             |
| Completeness to theta = 25.242°   | 99.9 %                                                                                             |
| Absorption correction             | Semi-empirical from equivalents                                                                    |
| Max. and min. transmission        | 1.00000 and 0.42029                                                                                |
| Refinement method                 | Full-matrix least-squares on F <sup>2</sup>                                                        |
| Data / restraints / parameters    | 3504 / 115 / 227                                                                                   |
| Goodness-of-fit on F <sup>2</sup> | 1.034                                                                                              |
| Final R indices [I > 2σ(I)]       | R1 = 0.0314, wR2 = 0.0767                                                                          |
| R indices (all data)              | R1 = 0.0336, wR2 = 0.0780                                                                          |
| Absolute structure parameter      | 0.00(2)                                                                                            |
| Extinction coefficient            | n/a                                                                                                |
| Largest diff. peak and hole       | 0.324 and -0.282 e.Å <sup>-3</sup>                                                                 |

## X-ray crystal data of compound 5m (CCDC 2003259)

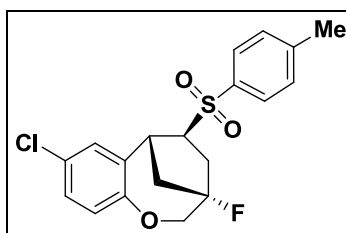

**Sample preparation** : A solution of compound **5m** (30 mg) in  $\text{CH}_2\text{Cl}_2$  (10 mL) was placed in a tube (10 mL). EtOAc (2 mL) was added slowly to the vial with a dropper. The vial was closed with little cotton and kept at room temperature for 2 days. Then, colorless prisms were observed.

**Crystal measurement** : X-ray crystal structures were determined with a Bruker Enraf-Nonius single-crystal diffractometer (CAD4, Kappa CCD). Thermal ellipsoids are drawn at 50% probability level.

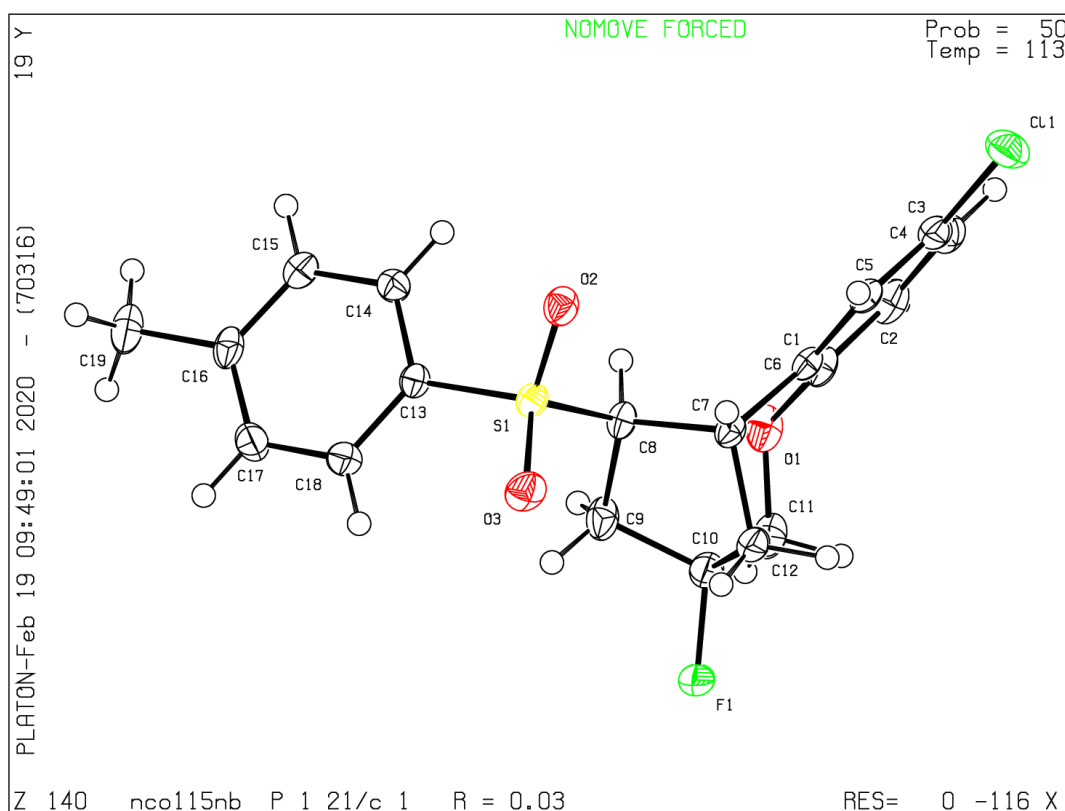

|                                             |                                                               |
|---------------------------------------------|---------------------------------------------------------------|
| Empirical formula                           | C <sub>19</sub> H <sub>18</sub> ClFO <sub>3</sub> S           |
| Formula weight                              | 380.84                                                        |
| Temperature/K                               | 113(2)                                                        |
| Crystal system                              | monoclinic                                                    |
| Space group                                 | P2 <sub>1</sub> /c                                            |
| a/Å                                         | 14.9529(3)                                                    |
| b/Å                                         | 7.52540(10)                                                   |
| c/Å                                         | 15.8144(3)                                                    |
| α/°                                         | 90.00                                                         |
| β/°                                         | 106.409(2)                                                    |
| γ/°                                         | 90.00                                                         |
| Volume/Å <sup>3</sup>                       | 1707.06(5)                                                    |
| Z                                           | 4                                                             |
| ρ <sub>calc</sub> /cm <sup>3</sup>          | 1.482                                                         |
| μ/mm <sup>-1</sup>                          | 0.372                                                         |
| F(000)                                      | 792.0                                                         |
| Crystal size/mm <sup>3</sup>                | 0.2 × 0.2 × 0.2                                               |
| Radiation                                   | MoKα (λ = 0.71073)                                            |
| 2θ range for data collection/°              | 5.32 to 52                                                    |
| Index ranges                                | -18 ≤ h ≤ 17, -9 ≤ k ≤ 9, -19 ≤ l ≤ 17                        |
| Reflections collected                       | 31146                                                         |
| Independent reflections                     | 3362 [R <sub>int</sub> = 0.0313, R <sub>sigma</sub> = 0.0181] |
| Data/restraints/parameters                  | 3362/0/227                                                    |
| Goodness-of-fit on F <sup>2</sup>           | 1.062                                                         |
| Final R indexes [I ≥ 2σ (I)]                | R <sub>1</sub> = 0.0307, wR <sub>2</sub> = 0.0783             |
| Final R indexes [all data]                  | R <sub>1</sub> = 0.0343, wR <sub>2</sub> = 0.0799             |
| Largest diff. peak/hole / e Å <sup>-3</sup> | 0.30/-0.39                                                    |

## X-ray crystal data of compound 6a (CCDC 2003260)

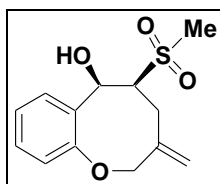

**Sample preparation** : A solution of compound **6a** (30 mg) in  $\text{CH}_2\text{Cl}_2$  (10 mL) was placed in a tube (10 mL). EtOAc (2 mL) was added slowly to the vial with a dropper. The vial was closed with little cotton and kept at room temperature for 2 days. Then, colorless prisms were observed.

**Crystal measurement** : X-ray crystal structures were determined with a Bruker Enraf-Nonius single-crystal diffractometer (CAD4, Kappa CCD). Thermal ellipsoids are drawn at 50% probability level.

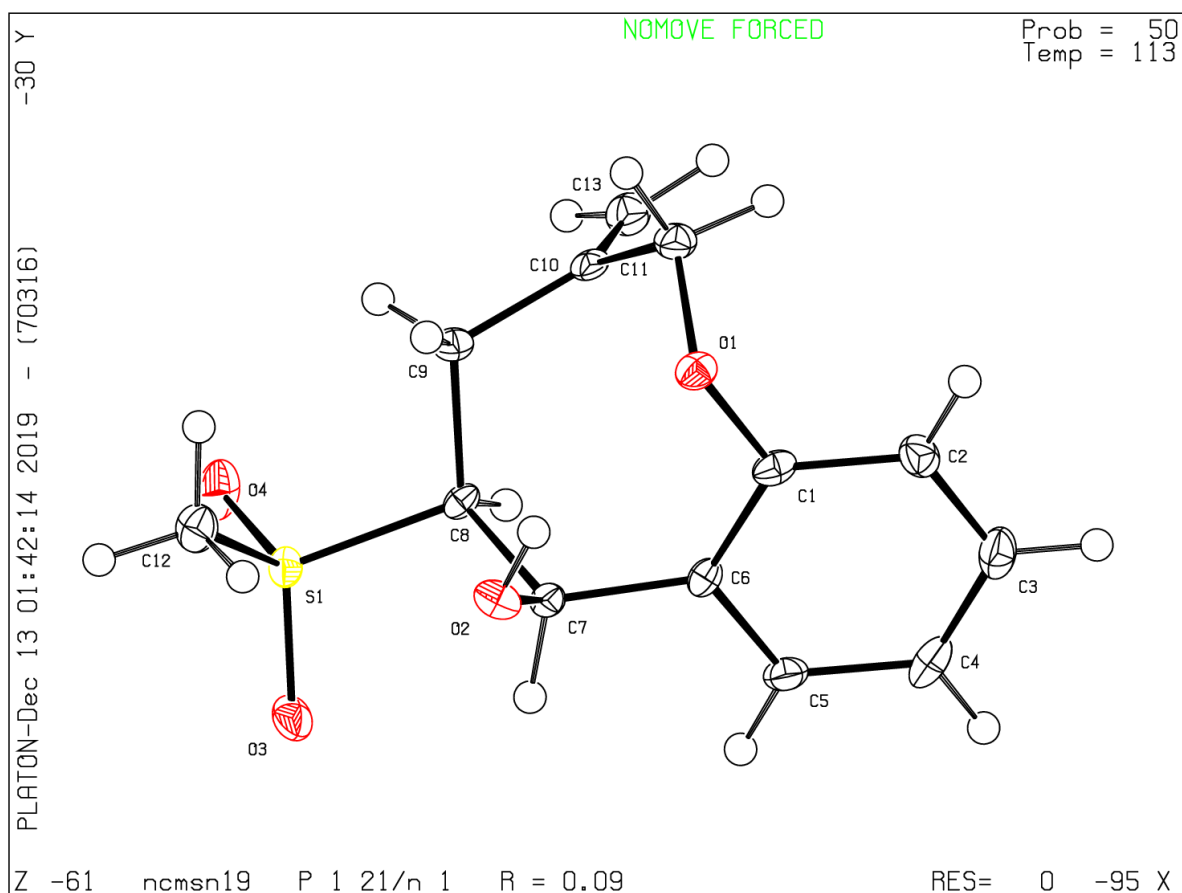



|                                   |                                                                                                        |
|-----------------------------------|--------------------------------------------------------------------------------------------------------|
| Empirical formula                 | C <sub>13</sub> H <sub>16</sub> O <sub>4</sub> S                                                       |
| Formula weight                    | 268.32                                                                                                 |
| Temperature                       | 113(2) K                                                                                               |
| Wavelength                        | 0.71073 Å                                                                                              |
| Crystal system                    | Monoclinic                                                                                             |
| Space group                       | P 1 21/n 1                                                                                             |
| Unit cell dimensions              | a = 8.1912(3) Å      α = 90°.<br>b = 6.0583(2) Å      β = 92.806(4)°.<br>c = 25.2332(11) Å    γ = 90°. |
| Volume                            | 1250.69(8) Å <sup>3</sup>                                                                              |
| Z                                 | 4                                                                                                      |
| Density (calculated)              | 1.425 Mg/m <sup>3</sup>                                                                                |
| Absorption coefficient            | 0.263 mm <sup>-1</sup>                                                                                 |
| F(000)                            | 568                                                                                                    |
| Crystal size                      | 0.25 x 0.2 x 0.2 mm <sup>3</sup>                                                                       |
| Theta range for data collection   | 2.580 to 27.034°.                                                                                      |
| Index ranges                      | -10 ≤ h ≤ 10, -7 ≤ k ≤ 7, -31 ≤ l ≤ 29                                                                 |
| Reflections collected             | 10768                                                                                                  |
| Independent reflections           | 2550 [R(int) = 0.0372]                                                                                 |
| Completeness to theta = 25.242°   | 98.3 %                                                                                                 |
| Absorption correction             | Semi-empirical from equivalents                                                                        |
| Max. and min. transmission        | 1.00000 and 0.47989                                                                                    |
| Refinement method                 | Full-matrix least-squares on F <sup>2</sup>                                                            |
| Data / restraints / parameters    | 2550 / 0 / 173                                                                                         |
| Goodness-of-fit on F <sup>2</sup> | 1.195                                                                                                  |
| Final R indices [I > 2σ(I)]       | R1 = 0.0854, wR2 = 0.2050                                                                              |
| R indices (all data)              | R1 = 0.0921, wR2 = 0.2070                                                                              |
| Extinction coefficient            | n/a                                                                                                    |
| Largest diff. peak and hole       | 1.228 and -0.464 e.Å <sup>-3</sup>                                                                     |

## X-ray crystal data of compound 7a (CCDC 2003261)

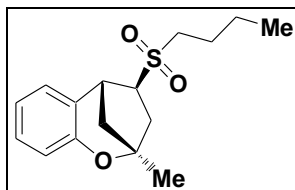

**Sample preparation** : A solution of compound **7a** (30 mg) in CH<sub>2</sub>Cl<sub>2</sub> (10 mL) was placed in a tube (10 mL). EtOAc (2 mL) was added slowly to the vial with a dropper. The vial was closed with little cotton and kept at room temperature for 2 days. Then, colorless prisms were observed.

**Crystal measurement** : X-ray crystal structures were determined with a Bruker Enraf-Nonius single-crystal diffractometer (CAD4, Kappa CCD). Thermal ellipsoids are drawn at 50% probability level.

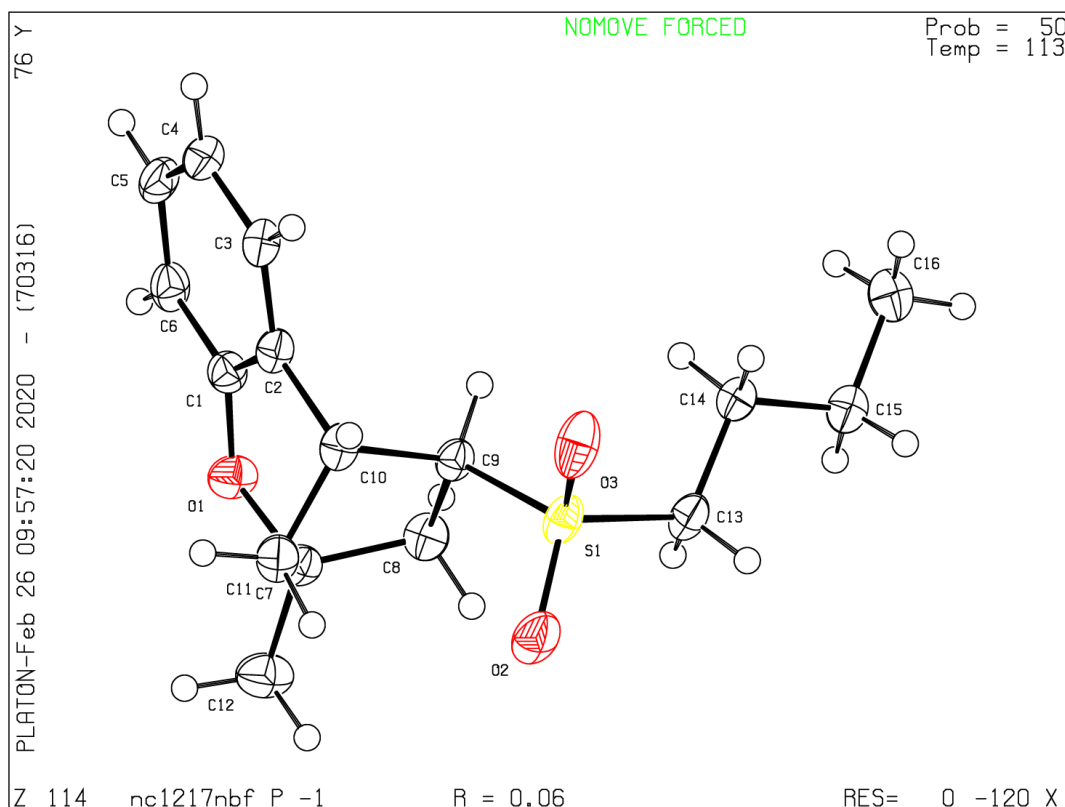

|                                             |                                                               |
|---------------------------------------------|---------------------------------------------------------------|
| Empirical formula                           | C <sub>16</sub> H <sub>22</sub> O <sub>3</sub> S              |
| Formula weight                              | 294.39                                                        |
| Temperature/K                               | 113(2)                                                        |
| Crystal system                              | triclinic                                                     |
| Space group                                 | P-1                                                           |
| a/Å                                         | 5.5686(2)                                                     |
| b/Å                                         | 9.5682(3)                                                     |
| c/Å                                         | 15.1726(5)                                                    |
| α/°                                         | 105.346(3)                                                    |
| β/°                                         | 92.676(2)                                                     |
| γ/°                                         | 102.631(3)                                                    |
| Volume/Å <sup>3</sup>                       | 756.02(5)                                                     |
| Z                                           | 2                                                             |
| ρ <sub>calc</sub> /cm <sup>3</sup>          | 1.293                                                         |
| μ/mm <sup>-1</sup>                          | 0.219                                                         |
| F(000)                                      | 316.0                                                         |
| Crystal size/mm <sup>3</sup>                | 0.15 × 0.1 × 0.1                                              |
| Radiation                                   | Mo Kα (λ = 0.71073)                                           |
| 2θ range for data collection/°              | 4.548 to 54.142                                               |
| Index ranges                                | -7 ≤ h ≤ 6, -12 ≤ k ≤ 11, -19 ≤ l ≤ 19                        |
| Reflections collected                       | 16987                                                         |
| Independent reflections                     | 3170 [R <sub>int</sub> = 0.0451, R <sub>sigma</sub> = 0.0366] |
| Data/restraints/parameters                  | 3170/0/191                                                    |
| Goodness-of-fit on F <sup>2</sup>           | 1.088                                                         |
| Final R indexes [I ≥ 2σ (I)]                | R <sub>1</sub> = 0.0572, wR <sub>2</sub> = 0.1449             |
| Final R indexes [all data]                  | R <sub>1</sub> = 0.0670, wR <sub>2</sub> = 0.1489             |
| Largest diff. peak/hole / e Å <sup>-3</sup> | 0.61/-0.38                                                    |

## X-ray crystal data of compound 7b (CCDC 2003262)

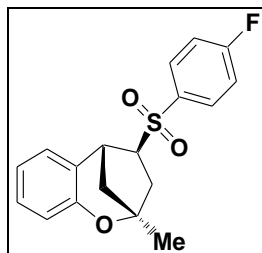

**Sample preparation** : A solution of compound **7b** (30 mg) in CH<sub>2</sub>Cl<sub>2</sub> (10 mL) was placed in a tube (10 mL). EtOAc (2 mL) was added slowly to the vial with a dropper. The vial was closed with little cotton and kept at room temperature for 2 days. Then, colorless prisms were observed.

**Crystal measurement** : X-ray crystal structures were determined with a Bruker Enraf-Nonius single-crystal diffractometer (CAD4, Kappa CCD). Thermal ellipsoids are drawn at 50% probability level.

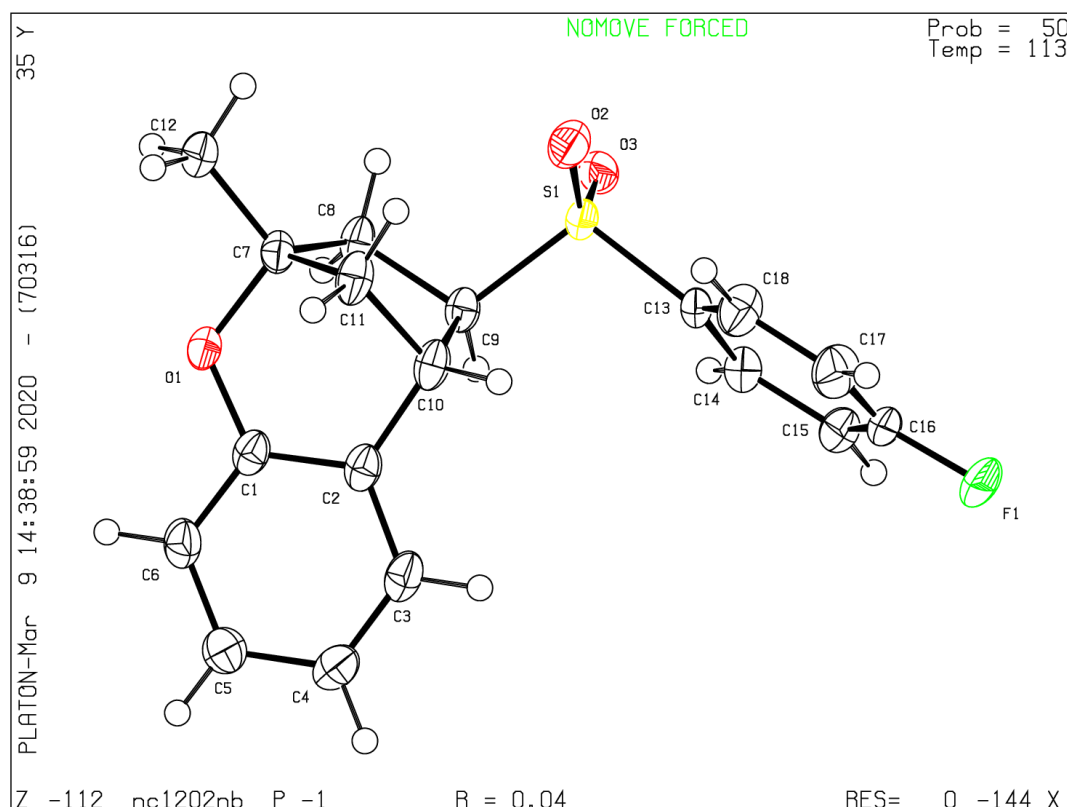

|                                             |                                                               |
|---------------------------------------------|---------------------------------------------------------------|
| Empirical formula                           | C <sub>18</sub> H <sub>17</sub> FO <sub>3</sub> S             |
| Formula weight                              | 332.38                                                        |
| Temperature/K                               | 113(2)                                                        |
| Crystal system                              | triclinic                                                     |
| Space group                                 | P-1                                                           |
| a/Å                                         | 6.87130(10)                                                   |
| b/Å                                         | 10.4176(3)                                                    |
| c/Å                                         | 11.8932(3)                                                    |
| α/°                                         | 99.558(2)                                                     |
| β/°                                         | 105.692(2)                                                    |
| γ/°                                         | 96.770(2)                                                     |
| Volume/Å <sup>3</sup>                       | 796.26(3)                                                     |
| Z                                           | 2                                                             |
| ρ <sub>calc</sub> /cm <sup>3</sup>          | 1.386                                                         |
| μ/mm <sup>-1</sup>                          | 0.226                                                         |
| F(000)                                      | 348.0                                                         |
| Crystal size/mm <sup>3</sup>                | 0.15 × 0.15 × 0.1                                             |
| Radiation                                   | MoKα (λ = 0.71073)                                            |
| 2θ range for data collection/°              | 3.64 to 52                                                    |
| Index ranges                                | -8 ≤ h ≤ 8, -12 ≤ k ≤ 12, -14 ≤ l ≤ 14                        |
| Reflections collected                       | 12550                                                         |
| Independent reflections                     | 3134 [R <sub>int</sub> = 0.0226, R <sub>sigma</sub> = 0.0250] |
| Data/restraints/parameters                  | 3134/0/209                                                    |
| Goodness-of-fit on F <sup>2</sup>           | 1.076                                                         |
| Final R indexes [I ≥ 2σ (I)]                | R <sub>1</sub> = 0.0416, wR <sub>2</sub> = 0.1025             |
| Final R indexes [all data]                  | R <sub>1</sub> = 0.0484, wR <sub>2</sub> = 0.1059             |
| Largest diff. peak/hole / e Å <sup>-3</sup> | 0.71/-0.52                                                    |

## X-ray crystal data of compound 9 (CCDC 2008547)

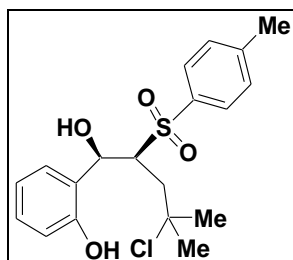

**Sample preparation** : A solution of compound **9** (30 mg) in CH<sub>2</sub>Cl<sub>2</sub> (10 mL) was placed in a tube (10 mL). EtOAc (2 mL) was added slowly to the vial with a dropper. The vial was closed with little cotton and kept at room temperature for 2 days. Then, colorless prisms were observed.

**Crystal measurement** : X-ray crystal structures were determined with a Bruker Enraf-Nonius single-crystal diffractometer (CAD4, Kappa CCD). Thermal ellipsoids are drawn at 50% probability level.

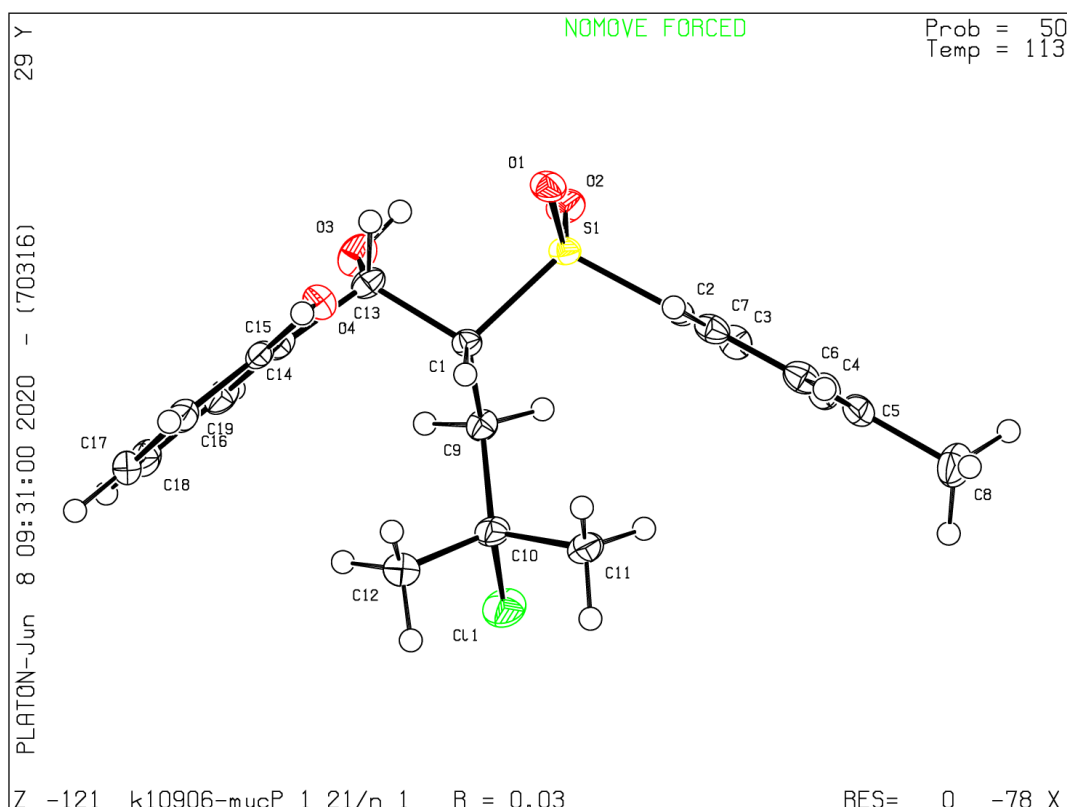

|                                             |                                                               |
|---------------------------------------------|---------------------------------------------------------------|
| Empirical formula                           | C <sub>19</sub> H <sub>23</sub> ClO <sub>4</sub> S            |
| Formula weight                              | 389.36                                                        |
| Temperature/K                               | 113(2)                                                        |
| Crystal system                              | monoclinic                                                    |
| Space group                                 | P2 <sub>1</sub> /n                                            |
| a/Å                                         | 14.5435(3)                                                    |
| b/Å                                         | 6.0581(2)                                                     |
| c/Å                                         | 20.5872(4)                                                    |
| α/°                                         | 90.00                                                         |
| β/°                                         | 93.464(2)                                                     |
| γ/°                                         | 90.00                                                         |
| Volume/Å <sup>3</sup>                       | 1810.54(8)                                                    |
| Z                                           | 4                                                             |
| ρ <sub>calc</sub> /cm <sup>3</sup>          | 1.428                                                         |
| μ/mm <sup>-1</sup>                          | 0.353                                                         |
| F(000)                                      | 825.0                                                         |
| Crystal size/mm <sup>3</sup>                | 0.3 × 0.3 × 0.2                                               |
| Radiation                                   | MoKα (λ = 0.71073)                                            |
| 2θ range for data collection/°              | 3.96 to 54.14                                                 |
| Index ranges                                | -18 ≤ h ≤ 18, -6 ≤ k ≤ 7, -26 ≤ l ≤ 25                        |
| Reflections collected                       | 38190                                                         |
| Independent reflections                     | 3861 [R <sub>int</sub> = 0.0328, R <sub>sigma</sub> = 0.0190] |
| Data/restraints/parameters                  | 3861/0/231                                                    |
| Goodness-of-fit on F <sup>2</sup>           | 1.072                                                         |
| Final R indexes [I ≥ 2σ (I)]                | R <sub>1</sub> = 0.0332, wR <sub>2</sub> = 0.0874             |
| Final R indexes [all data]                  | R <sub>1</sub> = 0.0379, wR <sub>2</sub> = 0.0898             |
| Largest diff. peak/hole / e Å <sup>-3</sup> | 0.38/-0.35                                                    |
